# Supplementary material
Source: PubMed Central journal article supplement (PMC3337885)

## Supporting Information

# Divergent Total Synthesis of (–)-Aspidospermine and (+)-Spegazzinine

James P. Lajiness, Wanlong Jiang, and Dale L. Boger

*Contribution from the Department of Chemistry and The Skaggs Institute for Chemical Biology, The Scripps Research Institute, 10650 North Torrey Pines Road, La Jolla, California 92037*

*boger@scripps.edu*

### Table of Contents

|                                                                                                          |         |
|----------------------------------------------------------------------------------------------------------|---------|
| Supporting Information Scheme 1.....                                                                     | S2      |
| Supporting Information Scheme 2.....                                                                     | S2      |
| Experimental Details for compounds <b>1</b> , <b>2</b> , <b>4-40</b> .....                               | S3-S17  |
| <sup>1</sup> H NMR and <sup>13</sup> C NMR spectrum of compounds <b>1</b> , <b>2</b> , <b>4-40</b> ..... | S18-S76 |

### Supporting Information Scheme 1.

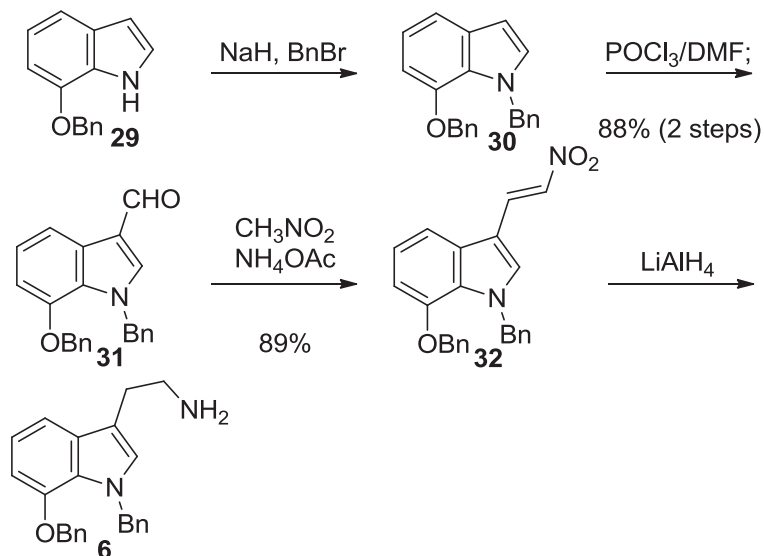

### Supporting Information Scheme 2.

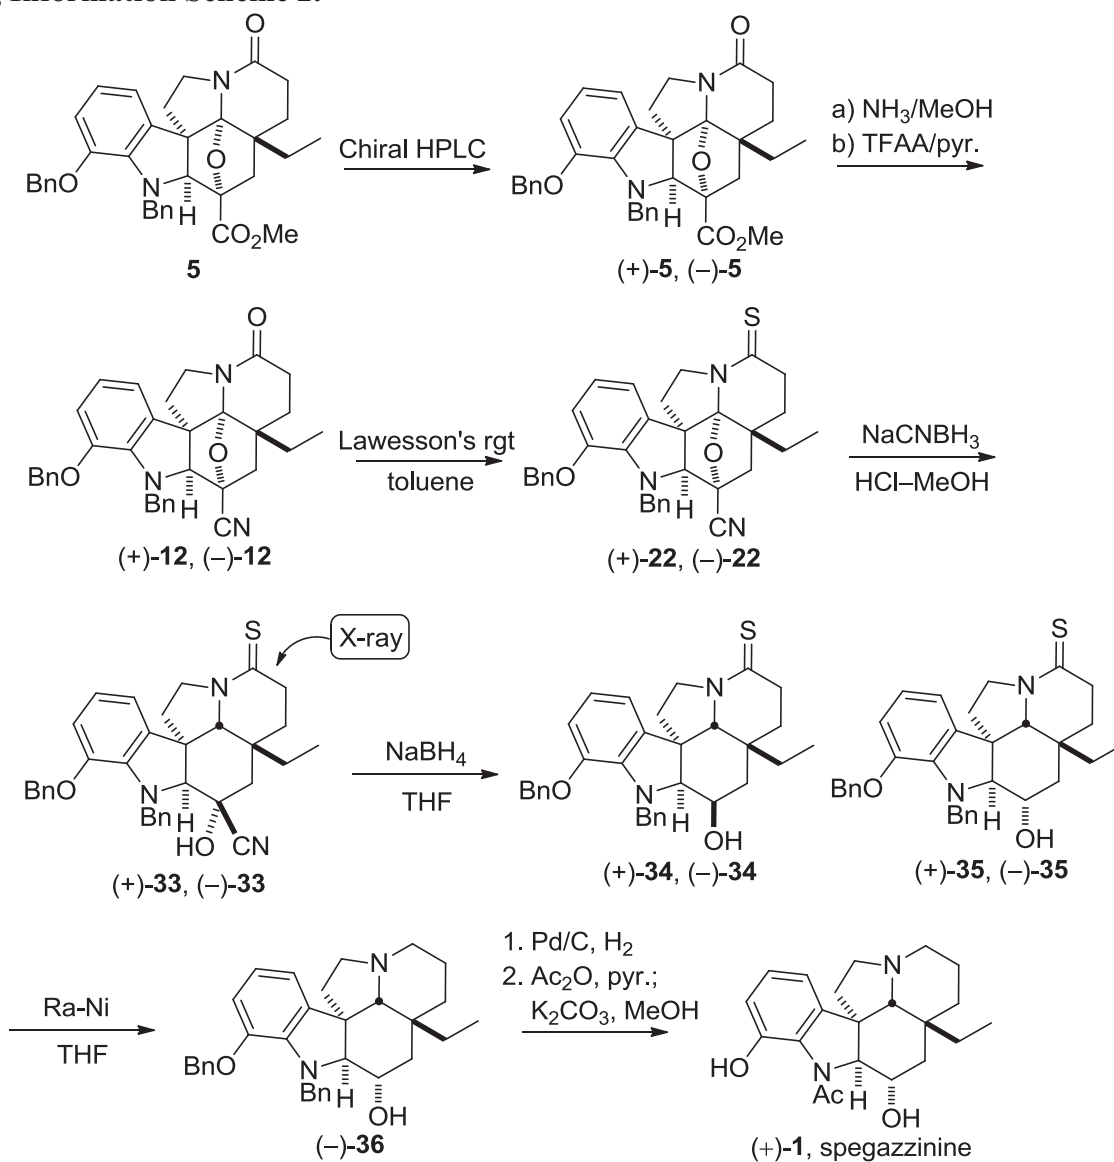

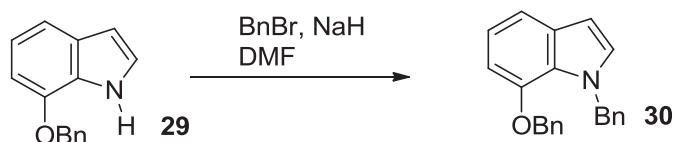

A suspension of NaH (0.367 g, 9.17 mmol, 60% dispersion in mineral oil) in DMF (30 mL) was treated with 7-benzyloxyindole (**29**, 1.02 g, 4.58 mmol) in small portions at room temperature. The reaction mixture was stirred at room temperature for 1 h followed by the addition of BnBr (1.64 mL, 13.8 mmol). The reaction mixture was warmed at 55 °C overnight, cooled to room temperature, and concentrated under reduced pressure to provide **30** as a brown oil that was used in the next step without further purification.

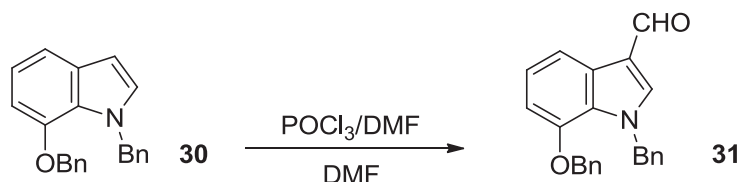

A solution of **30** (1.43 g, 4.58 mmol) in DMF (2 mL) at 0 °C was added slowly to the Vilsmeier reagent, prepared from slow addition of POCl<sub>3</sub> (0.47 mL, 5.04 mmol) to DMF (4.3 mL, 55.0 mmol) at 0 °C. The reaction mixture was warmed to 35 °C and stirred for 95 min before it was poured into crushed ice. An aqueous NaOH solution (4.4 mL of aqueous 20% solution, 22.0 mmol) was added dropwise to the reaction mixture and the solution was quickly boiled for 5 min. The reaction mixture was cooled and diluted with CH<sub>2</sub>Cl<sub>2</sub>, washed with H<sub>2</sub>O and saturated aqueous NaCl, and dried (Na<sub>2</sub>SO<sub>4</sub>). The solvent was removed under reduced pressure and the residue was purified by flash chromatography (15–20% EtOAc/hexanes) to provide **31** as a colorless crystalline solid (1.38 g, 88% over two steps): mp 133 °C; <sup>1</sup>H NMR (CDCl<sub>3</sub>, 400 MHz) δ 10.00 (s, 1H), 7.94 (d, *J* = 8.0 Hz, 1H), 7.63 (s, 1H), 7.30–7.35 (m, 3H), 7.24–7.29 (m, 3H), 7.16–7.24 (m, 3H), 6.91–6.98 (m, 2H), 6.81 (d, *J* = 7.8 Hz, 1H), 5.63 (s, 2H), 5.08 (s, 2H); <sup>13</sup>C NMR (CDCl<sub>3</sub>, 100 MHz) δ 184.6, 146.5, 139.3, 137.5, 136.2, 128.7, 128.5, 128.1, 127.9, 127.8, 127.6, 127.0, 126.5, 123.7, 118.4, 114.6, 106.2, 70.4, 53.5; IR (film) ν<sub>max</sub> 3105, 2798, 1649, 1533 cm<sup>-1</sup>; ESI-TOF HRMS *m/z* 342.1489 (M+H<sup>+</sup>, C<sub>23</sub>H<sub>20</sub>NO<sub>2</sub> requires 342.1488).

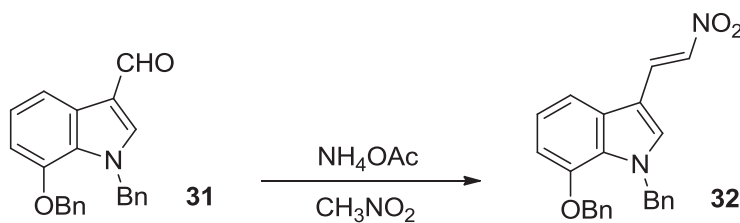

A solution of **31** (2.36 g, 6.91 mmol) in nitromethane (15 mL) was treated with ammonium acetate (586 mg, 7.60 mmol). The reaction mixture was warmed at reflux under nitrogen for 1 h and then cooled to room temperature. The solution was diluted with CH<sub>2</sub>Cl<sub>2</sub>, washed with H<sub>2</sub>O and saturated aqueous NaCl, and dried (Na<sub>2</sub>SO<sub>4</sub>). The solvent was removed under reduced pressure and the residue was recrystallized from 30% EtOAc/hexanes to provide **32** as yellow needle-like crystals (2.36 g, 89%): mp 145–146 °C; <sup>1</sup>H NMR (CDCl<sub>3</sub>, 400 MHz) δ 8.24 (d, *J* = 13.4 Hz, 1H), 7.74 (d, *J* = 13.4 Hz, 1H), 7.46 (s, 1H), 7.37 (d, *J* = 8.0 Hz, 1H), 7.30–7.35 (m, 3H), 7.24–7.29 (m, 3H), 7.16–7.20 (m, 3H), 6.90–6.96 (m, 2H), 6.82 (d, *J* = 7.8 Hz, 1H), 5.62 (s, 2H), 5.09 (s, 2H); <sup>13</sup>C NMR (CDCl<sub>3</sub>, 100 MHz) δ 147.1, 137.5, 136.7, 136.0, 133.3, 132.2, 128.7, 128.6, 128.2, 128.2, 127.8, 127.6, 127.5, 126.4, 123.4, 113.2, 108.6, 106.1, 70.5, 53.4; IR (film) ν<sub>max</sub> 3107, 3031, 1611, 1527 cm<sup>-1</sup>; ESI-TOF HRMS *m/z* 385.1541 (M+H<sup>+</sup>, C<sub>24</sub>H<sub>21</sub>N<sub>2</sub>O<sub>3</sub> requires 385.1547).

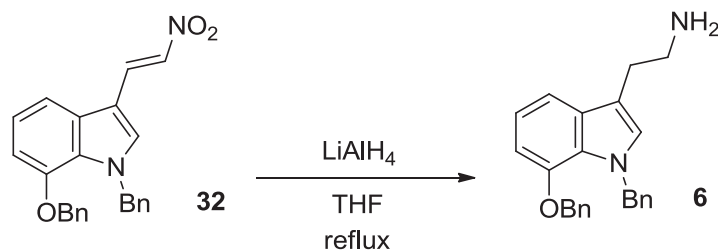

A solution of **32** (2.38 g, 6.18 mmol) in THF (10 mL) was added dropwise to a suspension of LiAlH<sub>4</sub> (1.41 g, 37.1 mmol) in anhydrous THF (40 mL) at 0 °C. The reaction mixture was warmed at reflux for 1.5 h and then the excess reagent was destroyed by addition of Na<sub>2</sub>SO<sub>4</sub>•10H<sub>2</sub>O (19.9 g, 61.8 mmol). The resulting mixture was filtered through Celite and washed with CH<sub>2</sub>Cl<sub>2</sub>. The filtrate was concentrated to provide crude **6** as a colorless oil that was used in the next step without purification.

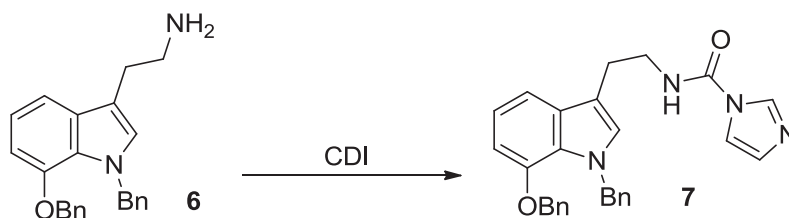

A solution of crude **6** (6.18 mmol) in anhydrous CH<sub>2</sub>Cl<sub>2</sub> (20 mL) was added to a solution of 1,1'-carbonyldiimidazole (CDI, 2.00 g, 12.4 mmol) in anhydrous THF (50.0 mL) at 0 °C. The reaction mixture was allowed to warm to room temperature slowly and was stirred overnight. The reaction mixture was diluted with CH<sub>2</sub>Cl<sub>2</sub>, washed with saturated aqueous NaCl, and dried (Na<sub>2</sub>SO<sub>4</sub>). The solvent was removed under reduced pressure and the residue was purified by flash chromatography (60–90% EtOAc/hexanes gradient) to provide **7** as a white colorless crystalline solid (2.14 g, 77% over two steps): mp 129 °C; <sup>1</sup>H NMR (CDCl<sub>3</sub>, 400 MHz) δ 7.91 (s, 1H), 7.28–7.33 (m, 3H), 7.16–7.25 (m, 6H), 7.07 (s, 1H), 7.01 (t, *J* = 7.9 Hz, 1H), 6.99 (s, 1H), 6.91–6.95 (m, 2H), 6.91 (s, 1H), 6.71 (d, *J* = 7.7 Hz, 1H), 5.78 (bs, 1H, NH), 5.57 (s, 2H), 5.10 (s, 2H), 3.71 (q, *J* = 6.4 Hz, 2H), 3.06 (t, *J* = 6.4 Hz, 2H); <sup>13</sup>C NMR (CDCl<sub>3</sub>, 100 MHz) δ 148.7, 146.9, 139.4, 136.6, 130.2, 130.1, 128.5, 128.5, 127.9, 127.6, 127.5, 127.1, 126.5, 126.4, 120.1, 115.7, 111.6, 111.5, 104.2, 70.3, 52.3, 41.3, 25.0; IR (film) ν<sub>max</sub> 3031, 2928, 1715, 1548 cm<sup>-1</sup>; ESI-TOF HRMS *m/z* 451.2131 (M+H<sup>+</sup>, C<sub>28</sub>H<sub>27</sub>N<sub>4</sub>O<sub>2</sub> requires 451.2128).

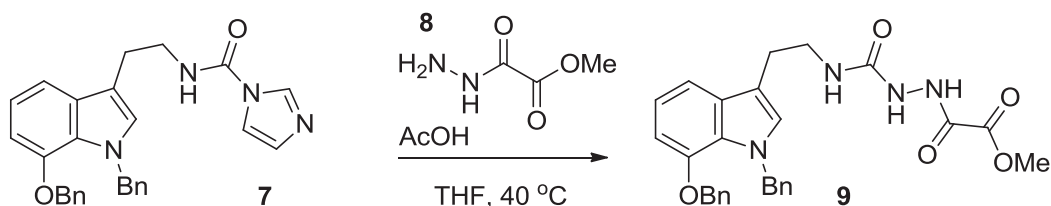

Methyl oxalyl hydrazide (**8**, 204 mg, 1.73 mmol) was added to a solution of **7** (648 mg, 1.44 mmol) and AcOH (91 μL, 1.58 mmol) in THF (15 mL). The mixture was warmed to 40 °C overnight, then cooled to room temperature and concentrated under reduced pressure. The resulting residue was diluted with CH<sub>2</sub>Cl<sub>2</sub> and washed with aqueous citric acid (10%, 30 mL). The aqueous layer was extracted quickly with CH<sub>2</sub>Cl<sub>2</sub> (3 × 20 mL). The combined organic layers were dried (Na<sub>2</sub>SO<sub>4</sub>) and concentrated to provide **9** as a light brown powder that was used immediately in the next step without purification.

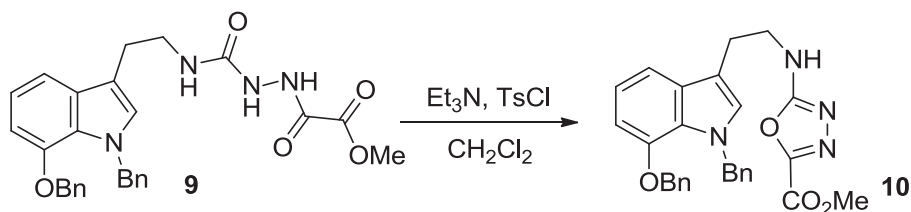

A solution of **9** (1.44 mmol) in  $\text{CH}_2\text{Cl}_2$  (50 mL) at  $0\text{ }^\circ\text{C}$  was treated with  $\text{Et}_3\text{N}$  (0.50 mL, 3.60 mmol) and  $\text{TsCl}$  (302 mg, 1.58 mmol). The reaction mixture was warmed slowly to room temperature over 6 h and poured into saturated aqueous  $\text{NaHCO}_3$  (20 mL). The mixture was extracted with  $\text{EtOAc}$  ( $3 \times 15$  mL). The combined organic layers were washed with water and saturated aqueous  $\text{NaCl}$ , dried over anhydrous  $\text{Na}_2\text{SO}_4$  and concentrated under reduced pressure. The residue was purified by flash chromatography (40–45%  $\text{EtOAc}$ /hexanes) to provide **10** as a white solid (489 mg, 70% over two steps): mp  $132\text{ }^\circ\text{C}$ ;  $^1\text{H NMR}$  ( $\text{CDCl}_3$ , 400 MHz)  $\delta$  7.27–7.33 (m, 3H), 7.16–7.24 (m, 6H), 7.01 (t,  $J = 7.9$  Hz, 1H), 6.90–6.93 (m, 2H), 6.90 (s, 1H), 6.70 (d,  $J = 7.7$  Hz, 1H), 5.57 (s, 2H), 5.08 (s, 2H), 3.98 (s, 3H), 3.76 (q,  $J = 6.5$  Hz, 2H), 3.09 (t,  $J = 6.5$  Hz, 2H);  $^{13}\text{C NMR}$  ( $\text{CDCl}_3$ , 100 MHz)  $\delta$  164.6, 155.0, 151.2, 147.0, 139.7, 36.9, 130.3, 128.69, 128.68, 128.1, 128.0, 127.8, 127.2, 126.7, 126.5, 70.5, 53.4, 52.5, 43.8, 25.4; IR (film)  $\nu_{\text{max}}$  3031, 2927, 1738, 1618,  $1572\text{ cm}^{-1}$ ; ESI-TOF HRMS  $m/z$  483.2014 ( $\text{M}+\text{H}^+$ ,  $\text{C}_{28}\text{H}_{27}\text{N}_4\text{O}_4$  requires 483.2027).

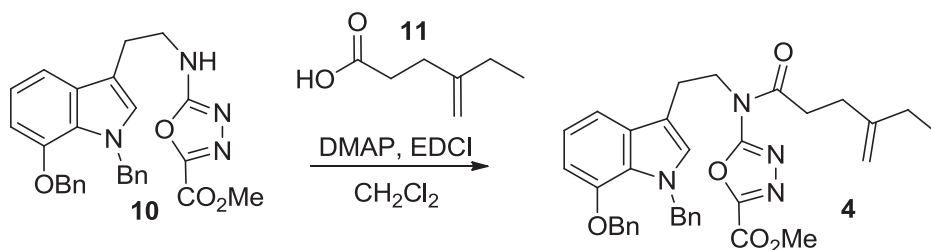

A solution of **10** (458 mg, 0.950 mmol) in  $\text{CH}_2\text{Cl}_2$  (20 mL) was treated with DMAP (174 mg, 1.43 mmol) and EDCI (273 mg, 1.43 mmol). 4-Ethyl-4-pentenoic acid (**11**, 183 mg, 1.43 mmol) in  $\text{CH}_2\text{Cl}_2$  (5 mL) was added and the reaction mixture was stirred for 18 h at room temperature. The reaction mixture was treated with saturated aqueous  $\text{NaHCO}_3$ , diluted with  $\text{EtOAc}$ , washed with water, saturated aqueous  $\text{NaCl}$ , and dried ( $\text{Na}_2\text{SO}_4$ ). The solvent was removed under reduced pressure and the residue was purified by flash chromatography (15–20%  $\text{EtOAc}$ /hexanes) to provide **4** as a white wax-like crystalline solid (489 mg, 87%): mp  $102\text{ }^\circ\text{C}$ ;  $^1\text{H NMR}$  ( $\text{CDCl}_3$ , 400 MHz)  $\delta$  7.23–7.32 (m, 4H), 7.14–7.21 (m, 5H), 6.98 (dd,  $J = 7.8$  Hz, 1H), 6.87 (dd,  $J = 7.7$  Hz, 2.0 Hz, 2H), 6.84 (s, 1H), 6.64 (d,  $J = 7.7$  Hz, 1H), 5.51 (s, 2H), 5.03 (s, 2H), 4.73 (s, 1H), 4.67 (s, 1H), 4.18–4.24 (m, 2H), 3.98 (s, 3H), 3.07 (t,  $J = 7.6$  Hz, 2H), 2.94 (t,  $J = 7.5$  Hz, 2H), 2.37 (t,  $J = 7.8$  Hz, 2H), 2.01 (q,  $J = 7.3$  Hz, 2H), 1.01 (t,  $J = 7.4$  Hz, 3H);  $^{13}\text{C NMR}$  ( $\text{CDCl}_3$ , 100 MHz)  $\delta$  172.0, 162.0, 154.1, 153.4, 149.4, 146.7, 139.5, 136.8, 130.1, 128.4, 127.9, 127.8, 127.6, 126.9, 126.3, 126.2, 119.8, 111.9, 110.8, 108.3, 103.9, 70.2, 53.6, 52.2, 47.7, 34.8, 30.9, 28.9, 24.2, 12.3; IR (film)  $\nu_{\text{max}}$  3030, 2962, 1746, 1702,  $1559\text{ cm}^{-1}$ ; ESI-TOF HRMS  $m/z$  593.2756 ( $\text{M}+\text{H}^+$ ,  $\text{C}_{35}\text{H}_{37}\text{N}_4\text{O}_5$  requires 593.2758).

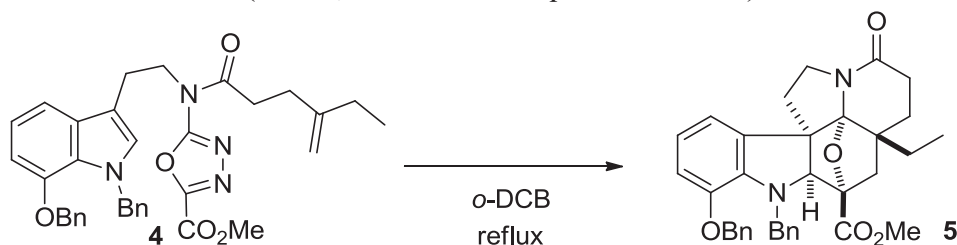

A solution of **4** (268 mg, 0.452 mmol) in anhydrous, degassed 1,2-dichlorobenzene (450 mL) was warmed at reflux for 13 h. The cooled reaction mixture was loaded onto a silica gel column pre-equilibrated in hexanes.

The 1,2-dichlorobenzene was first eluted with hexanes and the product was purified (50–100% EtOAc/hexanes gradient) to provide **5** as a tan oil (181 mg, 71%):  $^1\text{H NMR}$  ( $\text{CDCl}_3$ , 400 MHz)  $\delta$  7.27–7.35 (m, 6H), 7.16–7.24 (m, 2H), 7.07–7.12 (m, 2H), 6.84 (d,  $J = 8.1$  Hz, 1H), 6.69 (dd,  $J = 8.1, 7.5$  Hz, 1H), 6.54 (d,  $J = 7.5$  Hz, 1H), 5.19 (d,  $J = 15.7$  Hz, 1H), 5.17 (d,  $J = 11.9$  Hz, 1H), 5.07 (d,  $J = 11.9$  Hz, 1H), 4.47 (d,  $J = 15.7$  Hz, 1H), 4.19 (s, 1H), 3.82–3.98 (m, 2H), 3.74 (s, 3H), 2.02–2.38 (m, 4H), 2.37 (d,  $J = 12.5$  Hz, 1H), 1.79 (d,  $J = 12.5$  Hz, 1H), 1.68–1.72 (m, 1H), 0.76–0.89 (m, 2H), 0.59 (t,  $J = 7.3$  Hz, 3H), 0.10–0.20 (m, 1H);  $^{13}\text{C NMR}$  ( $\text{CDCl}_3$ , 100 MHz)  $\delta$  171.1, 170.4, 145.3, 141.0, 138.6, 136.7, 131.5, 128.5, 128.3, 128.1, 127.9, 127.4, 127.0, 120.3, 117.1, 114.2, 106.9, 85.6, 79.9, 70.6, 65.1, 53.3, 52.5, 46.9, 43.9, 38.6, 37.2, 29.2, 27.8, 22.2, 9.8; IR (film)  $\nu_{\text{max}}$  2932, 1720, 1654, 1560  $\text{cm}^{-1}$ ; ESI-TOF HRMS  $m/z$  565.2698 ( $\text{M}+\text{H}^+$ ,  $\text{C}_{35}\text{H}_{37}\text{N}_2\text{O}_5$  requires 565.2697).

Racemic **5** was resolved by chiral phase HPLC ( $\alpha = 1.40$ , Chiralcel OD; 20% *i*-PrOH/hexanes; 7 mL/min).

(–)-**5**:  $[\alpha]_{\text{D}}^{23} -35$  ( $c$  3.7,  $\text{CH}_2\text{Cl}_2$ ).

ent-(+)-**5**:  $[\alpha]_{\text{D}}^{23} +36$  ( $c$  3.4,  $\text{CH}_2\text{Cl}_2$ ).

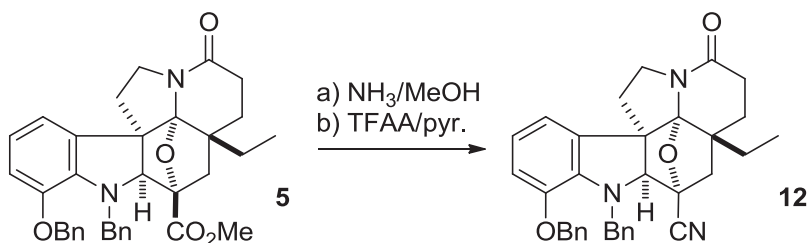

A solution of **5** (280 mg, 0.498 mmol) in MeOH (70 mL) in a heavy-wall reaction vessel was cooled to 0 °C. Ammonia gas was bubbled through the solution for 30 min before the vessel was sealed and warmed at 70 °C for 3 h under glass-shield protection. The reaction mixture was cooled to room temperature and concentrated under reduced pressure. The residue containing the primary amide was dissolved in 1,4-dioxane (4 mL) and pyridine (0.167 mL, 2.08 mmol) and cooled to 0 °C. Trifluoroacetic anhydride (133  $\mu\text{L}$ , 1.04 mmol) was added to the mixture, and the solution was allowed to warm to room temperature. After 16 h, the reaction mixture was diluted with EtOAc and quenched with the addition of saturated aqueous  $\text{NaHCO}_3$ . The organic layer was washed with saturated aqueous NaCl, dried ( $\text{MgSO}_4$ ), and concentrated under reduced pressure. The residue was purified by flash chromatography (40–80% EtOAc/hexanes gradient) to provide **12** (224 mg, 85%) as a white solid: mp 170 °C;  $^1\text{H NMR}$  ( $\text{CDCl}_3$ , 400 MHz)  $\delta$  7.23–7.38 (m, 8H), 7.15–7.23 (m, 2H), 6.88 (d,  $J = 7.7$  Hz, 1H), 6.73 (dd,  $J = 7.7, 7.2$  Hz, 1H), 6.52 (d,  $J = 7.2$  Hz, 1H), 5.19 (d,  $J = 11.9$  Hz, 1H), 5.17 (d,  $J = 11.9$  Hz, 1H), 4.98 (d,  $J = 15.3$  Hz, 1H), 4.58 (d,  $J = 15.3$  Hz, 1H), 4.25 (s, 1H), 3.82–3.97 (m, 2H), 2.39 (d,  $J = 12.5$  Hz, 1H), 2.20–2.32 (m, 2H), 2.08–2.20 (m, 2H), 1.85 (d,  $J = 12.5$  Hz, 1H), 1.67–1.76 (m, 1H), 0.76–0.91 (m, 2H), 0.59 (t,  $J = 6.8$  Hz, 3H), 0.02–0.17 (m, 1H);  $^{13}\text{C NMR}$  ( $\text{CDCl}_3$ , 100 MHz)  $\delta$  170.1, 145.5, 140.3, 137.7, 136.5, 130.8, 128.6, 128.6, 128.3, 128.1, 127.6, 127.3, 121.0, 117.9, 117.0, 114.2, 107.8, 82.2, 74.1, 70.6, 64.6, 54.5, 46.9, 43.7, 40.4, 37.1, 29.1, 27.8, 22.1, 9.8; IR (film)  $\nu_{\text{max}}$  2931, 1665, 1587  $\text{cm}^{-1}$ ; ESI-TOF HRMS  $m/z$  532.2612 ( $\text{M}+\text{H}^+$ ,  $\text{C}_{34}\text{H}_{34}\text{N}_3\text{O}_3$  requires 532.2595).

(–)-**12**:  $[\alpha]_{\text{D}}^{23} -58$  ( $c$  3.1,  $\text{CH}_2\text{Cl}_2$ ).

ent-(+)-**12**:  $[\alpha]_{\text{D}}^{23} +60$  ( $c$  2.4,  $\text{CH}_2\text{Cl}_2$ ).

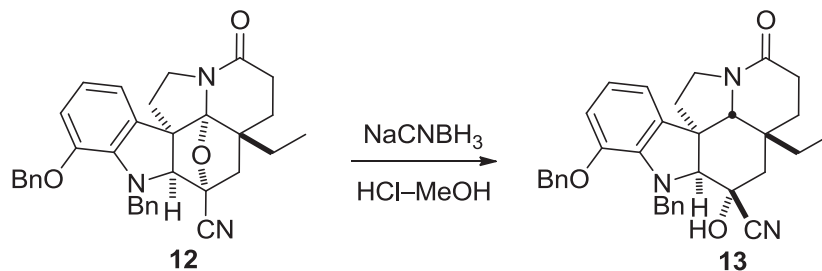



A solution of **12** (115 mg, 0.216 mmol) in MeOH (9 mL) was treated with acetyl chloride (9 drops) at 23 °C under argon. After 30 min of stirring (liberation of HCl), NaCNBH<sub>3</sub> (128 mg, 1.298 mmol) was added and the reaction mixture was stirred for 2 h at 23 °C. The reaction mixture was quenched with the addition of saturated aqueous NaHCO<sub>3</sub>, and the organic layer was extracted with EtOAc, washed with saturated aqueous NaCl, dried (Na<sub>2</sub>SO<sub>4</sub>), and concentrated under reduced pressure. The residue was purified by flash chromatography (5% MeOH/CH<sub>2</sub>Cl<sub>2</sub>) to provide **13** as a white solid (104 mg, 90%): <sup>1</sup>H NMR (CD<sub>3</sub>OD, 400 MHz) δ 7.80 (s, 1H), 7.71 (d, *J* = 5.6 Hz, 1H), 7.54–7.61 (m, 3H), 7.47–7.49 (m, 3H), 7.42–7.47 (m, 2H), 7.13 (d, *J* = 6.0 Hz, 1H), 7.01 (t, *J* = 6.0 Hz, 1H), 6.86 (d, *J* = 5.2 Hz, 1H), 5.70 (d, *J* = 12 Hz, 1H), 5.46 (d, *J* = 9.2 Hz, 1H), 5.41 (d, *J* = 9.2 Hz, 1H), 4.68 (d, *J* = 12 Hz, 1H), 3.98 (s, 1H), 3.60–3.63 (m, 1H), 3.42 (s, 1H), 3.28–3.35 (m, 1H), 2.44–2.59 (m, 2H), 2.10–2.15 (m, 1H), 2.05 (d, *J* = 11.6 Hz, 1H), 1.93–1.96 (m, 1H), 1.90 (d, *J* = 11.6 Hz, 1H), 1.77–1.81 (m, 1H), 1.63–1.70 (m, 1H), 1.36–1.40 (m, 1H), 1.09–1.13 (m, 2H), 1.07 (t, *J* = 6.0 Hz, 3H); <sup>13</sup>C NMR (CD<sub>3</sub>OD, 100 MHz) δ 170.9, 146.2, 138.7, 138.6, 137.2, 133.9, 129.2, 128.73, 128.71, 128.1, 127.9, 127.8, 122.0, 121.3, 115.6, 115.1, 77.4, 72.9, 71.5, 70.3, 64.7, 55.4, 53.9, 49.1, 42.8, 38.7, 35.2, 35.0, 31.4, 30.7, 28.3, 7.5; IR (film) ν<sub>max</sub> 2932, 1680, 1629 cm<sup>-1</sup>; ESI-TOF HRMS *m/z* 534.2750 (M+H<sup>+</sup>, C<sub>34</sub>H<sub>36</sub>N<sub>3</sub>O<sub>3</sub> requires 534.2751).

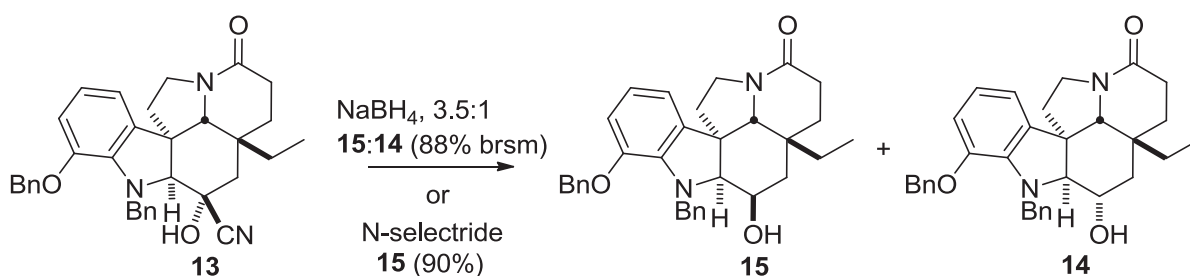

A solution of **13** (31.9 mg, 0.060 mmol) in anhydrous THF (6 mL) was treated with NaBH<sub>4</sub> (6.8 mg, 0.18 mmol) at 23 °C. The reaction mixture was stirred for 2 h, after which it was quenched by the addition of aqueous 1 M HCl, diluted with EtOAc, washed with saturated aqueous NaCl, dried (Na<sub>2</sub>SO<sub>4</sub>), and concentrated under reduced pressure. The residue was purified by PTLC (5% MeOH/CH<sub>2</sub>Cl<sub>2</sub>) to provide **15** (15.4 mg, 51%), **14** (4.4 mg, 15%), and recovered ketone (7.6 mg, 25%) as white solids.

A solution of **13** (4.9 mg, 0.0092 mmol) in anhydrous THF (1.0 mL) was treated with N-selectride (1 M in THF, 28 μL, 0.028 mmol) at 23 °C. The reaction mixture was stirred for 2 h, after which it was quenched by the addition of aqueous 1 M HCl, diluted with EtOAc, washed with saturated aqueous NaCl, dried (Na<sub>2</sub>SO<sub>4</sub>), and concentrated under reduced pressure. The residue was purified by PTLC (5% MeOH/CH<sub>2</sub>Cl<sub>2</sub>) to provide **15** (4.2 mg, 90%) as a white solid.

For **15**: <sup>1</sup>H NMR (CDCl<sub>3</sub>, 600 MHz) δ 7.45 (d, *J* = 7.2 Hz, 2H), 7.37 (t, *J* = 7.2 Hz, 2H), 7.32–7.34 (m, 1H), 7.21–7.25 (m, 3H), 7.10–7.15 (m, 2H), 6.88 (d, *J* = 8.4 Hz, 1H), 6.84 (t, *J* = 7.8 Hz, 1H), 6.59 (d, *J* = 7.2 Hz, 1H), 5.17–5.22 (m, 2H), 4.97 (d, *J* = 14 Hz, 1H), 4.32 (d, *J* = 14 Hz, 1H), 3.65 (br s, 1H), 3.47–3.52 (m, 2H), 3.30 (d, *J* = 5.4 Hz, 1H), 3.20–3.25 (m, 1H), 2.72 (br s, 1H), 2.27 (t, *J* = 6.6 Hz, 1H), 1.56–1.65 (m, 2H), 1.25–1.35 (m, 3H), 1.16–1.22 (m, 1H), 0.99–1.05 (m, 2H), 0.70 (t, *J* = 7.2 Hz, 3H); <sup>13</sup>C NMR (CDCl<sub>3</sub>, 150 MHz) δ 170.8, 146.6, 139.8, 138.1, 136.7, 136.2, 132.0, 129.1, 128.6, 128.5, 128.1, 127.7, 122.0, 115.4, 112.8, 70.7, 67.0, 66.9, 65.6, 56.1, 55.1, 42.4, 39.8, 35.0, 33.0, 32.7, 30.6, 29.2, 7.7; IR (film) ν<sub>max</sub> 3382, 2931, 2870, 1619 cm<sup>-1</sup>; ESI-TOF HRMS *m/z* 509.2804 (M+H<sup>+</sup>, C<sub>33</sub>H<sub>37</sub>N<sub>2</sub>O<sub>3</sub> requires 509.2799).

The structure and relative stereochemistry of **15** were established with a single X-ray structure determination (CCDC850758) conducted on white needles grown from 1:1 hexanes:CH<sub>2</sub>Cl<sub>2</sub>.

For **14**: <sup>1</sup>H NMR (CDCl<sub>3</sub>, 600 MHz) δ 7.42 (d, *J* = 7.2 Hz, 2H), 7.32 (t, *J* = 7.2 Hz, 2H), 7.21–7.30 (m, 6H), 6.84 (d, *J* = 7.8 Hz, 1H), 6.81 (t, *J* = 7.8 Hz, 1H), 6.60 (d, *J* = 7.2 Hz, 1H), 5.13 (s, 2H), 4.73 (d, *J* = 14 Hz, 1H),

4.39 (d,  $J = 14$  Hz, 1H), 3.66 (s, 1H), 3.37–3.47 (m, 3H), 2.72 (d,  $J = 7.8$  Hz, 1H), 2.34–2.38 (m, 1H), 2.22–2.28 (m, 1H), 1.71–1.75 (m, 1H), 1.48–1.59 (m, 5H), 1.38–1.42 (m, 1H), 1.21–1.33 (m, 1H), 0.68 (t,  $J = 7.2$  Hz, 3H);  $^{13}\text{C}$  NMR ( $\text{CDCl}_3$ , 150 MHz)  $\delta$  169.2, 147.5, 140.1, 138.4, 136.9, 136.7, 128.94, 128.92, 128.6, 128.1, 127.8, 127.7, 121.9, 114.8, 112.5, 71.2, 70.6, 69.8, 65.0, 57.0, 56.5, 42.8, 39.2, 36.1, 30.6, 29.2, 29.0, 27.8, 7.2; IR (film)  $\nu_{\text{max}}$  3326, 2927, 2870, 1612  $\text{cm}^{-1}$ ; ESI-TOF HRMS  $m/z$  509.2799 ( $\text{M}+\text{H}^+$ ,  $\text{C}_{33}\text{H}_{37}\text{N}_2\text{O}_3$  requires 509.2799).

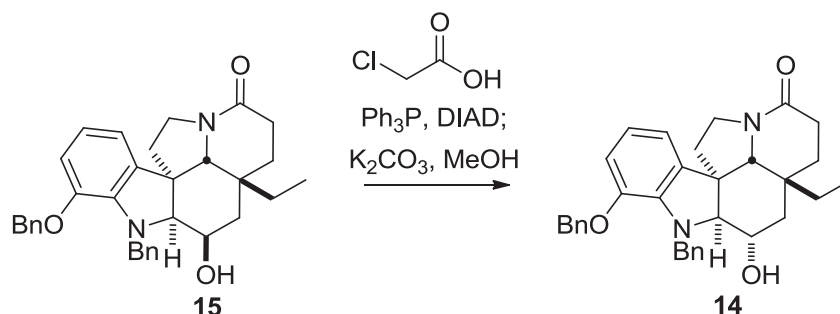

A solution of **15** (12.1 mg, 0.0238 mmol), 2-chloroacetic acid (6.8 mg, 0.0715 mmol), and  $\text{Ph}_3\text{P}$  (25.0 mg, 0.0953 mmol) in anhydrous toluene (1.0 mL) at 23 °C was treated dropwise with diisopropyl azodicarboxylate (DIAD, 18.8  $\mu\text{L}$ , 0.0953 mmol). The reaction mixture was stirred for 16 h, after which the solvent was removed under a stream of  $\text{N}_2$ . The residue was taken up in aqueous MeOH (2 mL) and  $\text{K}_2\text{CO}_3$  (33 mg, 0.238 mmol) was added. The reaction mixture was stirred for 2 h, after which it was diluted with EtOAc, washed with saturated aqueous NaCl, dried ( $\text{Na}_2\text{SO}_4$ ), and concentrated under reduced pressure. The residue was purified by PTLC (5% MeOH/ $\text{CH}_2\text{Cl}_2$ ) to provide **14** (6.8 mg, 56%) as a white solid.

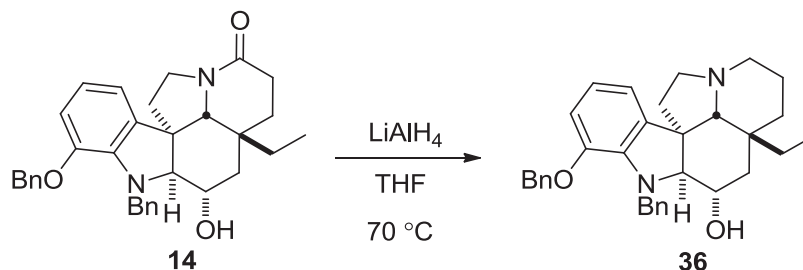

A solution of **14** (7.7 mg, 0.015 mmol) in anhydrous THF (1.5 mL) at 23 °C was treated with  $\text{LiAlH}_4$  (1 M in THF, 75.3  $\mu\text{L}$ , 0.0753 mmol). The reaction mixture was warmed at 70 °C and stirred for 3 h, after which the reaction was quenched with the addition of  $\text{H}_2\text{O}$ . The resulting mixture was diluted with EtOAc, washed with saturated aqueous NaCl, dried ( $\text{Na}_2\text{SO}_4$ ), and concentrated under reduced pressure. The residue was purified by PTLC (5% MeOH/ $\text{CH}_2\text{Cl}_2$ ) to afford **36** (4.9 mg, 63%) in addition to a singly debenzylated product (1.4 mg, 22%), which could be carried forward together to the next reaction. For **36**:  $^1\text{H}$  NMR ( $\text{CDCl}_3$ , 600 MHz)  $\delta$  7.74 (d,  $J = 7.2$  Hz, 1H), 7.72 (d,  $J = 7.8$  Hz, 1H), 7.45–7.55 (m, 3H), 7.18–7.30 (m, 5H), 6.78 (dd,  $J = 6.6, 3.0$  Hz, 1H), 6.70–6.72 (m, 2H), 5.10 (d,  $J = 12$  Hz, 1H), 5.02 (d,  $J = 12$  Hz, 1H), 4.83 (d,  $J = 15$  Hz, 1H), 4.57 (d,  $J = 16$  Hz, 1H), 3.79 (m, 1H), 3.47 (s, 1H), 3.11 (t,  $J = 8.4$  Hz, 1H), 3.05 (d,  $J = 9.6$  Hz, 1H), 2.27 (q,  $J = 12.6, 9.0$  Hz, 1H), 2.10 (t,  $J = 10.8$  Hz, 1H), 1.93–2.04 (m, 3H), 1.75–1.80 (m, 1H), 1.59–1.67 (m, 2H), 1.54 (d,  $J = 13.2$  Hz, 1H), 1.47 (d,  $J = 13.8$  Hz, 1H), 1.13–1.18 (m, 1H), 1.06–1.11 (m, 1H), 0.85–0.89 (q,  $J = 13.8, 7.2$  Hz, 2H), 0.55 (t,  $J = 7.2$  Hz, 3H);  $^{13}\text{C}$  NMR ( $\text{CDCl}_3$ , 150 MHz) 145.3, 140.2, 137.0, 131.8, 130.5, 128.7, 128.4, 128.2, 127.7, 127.3, 126.8, 119.7, 116.3, 112.9, 73.8, 70.6, 68.1, 54.3, 53.0, 52.7, 52.5, 43.4, 35.4, 34.9, 33.7, 29.7, 21.4, 7.3; IR (film)  $\nu_{\text{max}}$  3370, 2912, 1640, 1598  $\text{cm}^{-1}$ ; ESI-TOF HRMS  $m/z$  495.3012 ( $\text{M}+\text{H}^+$ ,  $\text{C}_{33}\text{H}_{38}\text{N}_2\text{O}_2$  requires 495.3017).

(–)-**36**:  $[\alpha]_{\text{D}}^{23} -18$  ( $c$  0.38,  $\text{CH}_2\text{Cl}_2$ ).



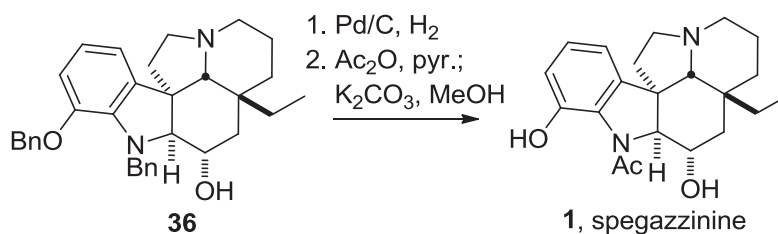

A solution of **36** (4.9 mg, 0.0099 mmol) in 2:1 anhydrous MeOH:CH<sub>2</sub>Cl<sub>2</sub> (3 mL) at 23 °C was treated with 10% Pd/C (20 mg). H<sub>2</sub> gas was bubbled through the reaction mixture for 10 min and then stirred for 45 min, after which the solution was filtered through a pad of Celite. The catalyst was washed (4 × 5 mL) with 1:1 MeOH:CH<sub>2</sub>Cl<sub>2</sub>, and then the catalyst was re-suspended in 1:1 MeOH:CH<sub>2</sub>Cl<sub>2</sub> (5 mL). The solution was sonicated for 5 min and then was filtered through a pad of Celite. The resulting filtrates were combined and concentrated under reduced pressure to afford the crude product **16**. Crude **16** was dissolved in pyridine (1.5 mL) and treated with Ac<sub>2</sub>O (15 drops) at 23 °C. The reaction mixture was stirred for 18 h, after which the solvent was removed under a stream of N<sub>2</sub>. The resulting residue was dissolved in aqueous MeOH and K<sub>2</sub>CO<sub>3</sub> (20 mg, 0.144 mmol) was added. The reaction mixture was stirred for 2 h, after which it was diluted with EtOAc, washed with saturated aqueous NaCl, dried (Na<sub>2</sub>SO<sub>4</sub>), and concentrated under reduced pressure. The residue was purified by PTLC (5% MeOH/CH<sub>2</sub>Cl<sub>2</sub>) to provide **1** (2.0 mg, 57% over 2 steps) as a white solid, which matched a natural sample of spigazzinine in all respects: <sup>1</sup>H NMR (CDCl<sub>3</sub>, 600 MHz) δ 10.72 (s, 1H), 7.04 (t, *J* = 7.8 Hz, 1H), 6.82 (d, *J* = 7.8 Hz, 1H), 6.65 (d, *J* = 7.2 Hz, 1H), 4.08 (d, *J* = 7.8 Hz, 1H), 3.67–3.73 (m, 1H), 3.16–3.20 (m, 1H), 3.07–3.09 (m, 1H), 2.50 (s, 3H), 2.29–2.32 (m, 2H), 2.07–2.15 (m, 2H), 2.02 (t, *J* = 11 Hz, 1H), 1.84–1.87 (m, 1H), 1.72–1.79 (m, 1H), 1.68 (d, *J* = 14 Hz, 1H), 1.56–1.63 (m, 2H), 1.41 (dd, *J* = 13, 3.6 Hz, 1H), 1.21–1.26 (m, 1H), 1.13 (dt, *J* = 13, 4.8 Hz, 1H), 0.88–0.92 (m, 2H), 0.68 (t, *J* = 7.2 Hz, 3H); <sup>13</sup>C NMR (CDCl<sub>3</sub>, 150 MHz) δ 172.4, 147.3, 140.8, 127.9, 127.8, 117.9, 113.2, 75.7, 70.3, 69.4, 54.3, 53.3, 52.1, 38.1, 37.2, 33.9, 32.9, 31.1, 23.7, 21.2, 6.9; IR (film) ν<sub>max</sub> 3390, 2932, 2787, 1625, 1600, 1572 cm<sup>-1</sup>; ESI-TOF HRMS *m/z* 357.2179 (M+H<sup>+</sup>, C<sub>21</sub>H<sub>29</sub>N<sub>2</sub>O<sub>3</sub> requires 357.2173).

Racemic **1** was resolved by chiral phase HPLC ( $\alpha$  = 1.28, Chiralcel OD; 50% *i*-PrOH/hexanes; 7 mL/min; 10.4 min unnatural; 13.3 min natural).

Synthetic sample: (+)-**1**: [ $\alpha$ ]<sub>D</sub><sup>23</sup> +125 (*c* 0.11, CHCl<sub>3</sub>).

Authentic sample: (+)-**1**: [ $\alpha$ ]<sub>D</sub><sup>23</sup> +131 (*c* 0.18, CHCl<sub>3</sub>).

Lit: [ $\alpha$ ]<sub>D</sub><sup>23</sup> +176 (*c* 0.65, CHCl<sub>3</sub>), Reference 1 (*J. Org. Chem.* **1956**, *21*, 979).

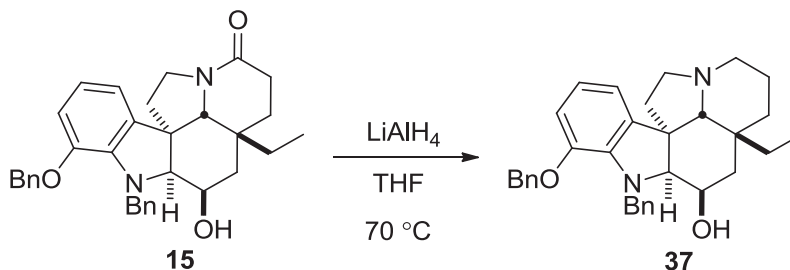

A solution of **15** (1.8 mg, 0.00354 mmol) in anhydrous THF (0.3 mL) at 23 °C was treated with LiAlH<sub>4</sub> (1 M in THF, 18.0 μL, 0.0177 mmol). The reaction mixture was warmed at 70 °C and stirred for 3 h, after which the reaction was quenched with the addition of H<sub>2</sub>O. The resulting mixture was diluted with EtOAc, washed with saturated aqueous NaCl, dried (Na<sub>2</sub>SO<sub>4</sub>), and concentrated under reduced pressure. The residue was purified by PTLC (5% MeOH/CH<sub>2</sub>Cl<sub>2</sub>) to afford **37** (1.2 mg, 69%) in addition to a singly debenzylated product (0.2 mg, 14%), which could be carried forward together to the next reaction. For **37**: <sup>1</sup>H NMR (CDCl<sub>3</sub>, 600 MHz) δ 7.40 (d, *J* = 6.8 Hz, 2H), 7.21–7.35 (m, 3H), 7.18–7.30 (m, 8H), 6.79–6.82 (m, 2H), 6.70–6.72 (dd, *J* = 5.6, 2.8 Hz,

1H), 5.10 (dd,  $J = 14, 13$  Hz, 1H), 4.83 (d,  $J = 14$  Hz, 1H), 4.50 (d,  $J = 14$  Hz, 1H), 3.79 (q,  $J = 9.6, 4.8$  Hz, 1H), 3.39 (d,  $J = 5.6$  Hz, 1H), 2.98–3.02 (m, 2H), 2.15 (q,  $J = 18, 9.2$  Hz, 1H), 2.08 (s, 1H), 1.90 (t,  $J = 11$  Hz, 1H), 1.78 (dd,  $J = 14, 4.0$  Hz, 1H), 1.67–1.72 (m, 2H), 1.58–1.63 (m, 2H), 1.45–1.54 (m, 3H), 0.97 (m, 1H), 0.79 (m, 1H), 0.67 (t,  $J = 7.2$  Hz, 3H);  $^{13}\text{C}$  NMR ( $\text{CDCl}_3$ , 150 MHz) 146.3, 141.0, 139.5, 139.0, 137.0, 128.7, 128.5, 128.3, 127.8, 127.4, 127.2, 121.5, 115.4, 111.6, 72.8, 72.3, 70.3, 67.5, 56.2, 53.6, 53.5, 52.9, 44.6, 35.2, 34.8, 33.2, 29.5, 21.7, 7.4; IR (film)  $\nu_{\text{max}}$  3382, 2922, 1641, 1592  $\text{cm}^{-1}$ ; ESI-TOF HRMS  $m/z$  459.3017 ( $\text{M}+\text{H}^+$ ,  $\text{C}_{33}\text{H}_{38}\text{N}_2\text{O}_2$  requires 459.3006).

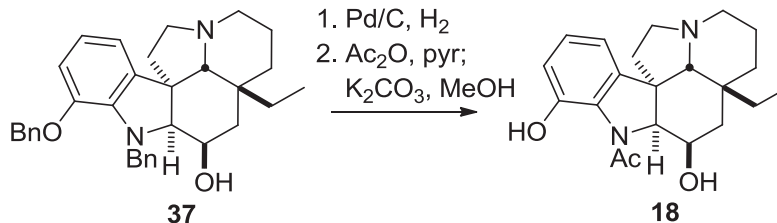

A solution of **37** (9.3 mg, 0.0188 mmol) in 2:1 anhydrous MeOH: $\text{CH}_2\text{Cl}_2$  (5.0 mL) at 23 °C was treated with 10% Pd/C (40 mg).  $\text{H}_2$  gas was bubbled through the reaction mixture for 10 min and then stirred for 45 min, after which the solution was filtered through a pad of Celite. The catalyst was washed ( $4 \times 5$  mL) with 1:1 MeOH: $\text{CH}_2\text{Cl}_2$ , and then the catalyst was re-suspended in 1:1 MeOH: $\text{CH}_2\text{Cl}_2$  (5 mL). The solution was sonicated for 5 min and then was filtered through a pad of Celite. The resulting filtrates were combined and concentrated under reduced pressure to afford the crude product **17**. Crude **17** was dissolved in pyridine (2.5 mL) and treated with  $\text{Ac}_2\text{O}$  (25 drops) at 23 °C. The reaction mixture was stirred for 18 h, after which the solvent was removed under a stream of  $\text{N}_2$ . The resulting residue was dissolved in aqueous MeOH and  $\text{K}_2\text{CO}_3$  (30 mg, 0.216 mmol) was added. The reaction mixture was stirred for 2 h, after which it was diluted with EtOAc, washed with saturated aqueous NaCl, dried ( $\text{Na}_2\text{SO}_4$ ), and concentrated under reduced pressure. The residue was purified by PTLC (5% MeOH/ $\text{CH}_2\text{Cl}_2$ ) to provide **18** (4.2 mg, 63% over 2 steps) as a white solid:  $^1\text{H}$  NMR ( $\text{CDCl}_3$ , 500 MHz)  $\delta$  10.55 (s, 1H), 7.03 (t,  $J = 7.8$  Hz, 1H), 6.79 (d,  $J = 7.8$  Hz, 1H), 6.68 (d,  $J = 7.2$  Hz, 1H), 4.33 (s, 1H), 4.12 (d,  $J = 5.5$  Hz, 1H), 3.09–3.13 (m, 1H), 3.04 (d,  $J = 10$  Hz, 1H), 2.38 (s, 1H), 2.35 (s, 3H), 2.25–2.32 (m, 1H), 1.99–2.09 (m, 3H), 1.56–1.71 (m, 7H), 1.01–1.05 (m, 1H), 0.91–0.95 (m, 1H), 0.73 (t,  $J = 7.5$  Hz, 3H); IR (film)  $\nu_{\text{max}}$  3350, 2931, 2787, 1629, 1600, 1574  $\text{cm}^{-1}$ ; ESI-TOF HRMS  $m/z$  357.2177 ( $\text{M}+\text{H}^+$ ,  $\text{C}_{21}\text{H}_{29}\text{N}_2\text{O}_3$  requires 357.2173).

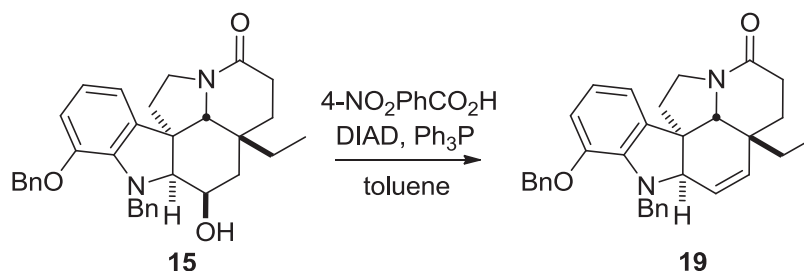

A solution of **15** (22.0 mg, 0.0433 mmol), 4-nitrobenzoic acid (21.7 mg, 0.130 mmol), and  $\text{Ph}_3\text{P}$  (45.4 mg, 0.173) in anhydrous toluene (1.0 mL) at 23 °C was treated dropwise with diisopropyl azodicarboxylate (DIAD, 34.1  $\mu\text{L}$ , 0.173 mmol). The reaction mixture was stirred for 5 h before it was diluted with EtOAc, washed with saturated aqueous  $\text{NaHCO}_3$ , saturated aqueous NaCl, dried ( $\text{Na}_2\text{SO}_4$ ), and concentrated under reduced pressure. The product **19** (>95% conversion by LCMS) was usually taken on crude to the next reaction due to its co-elution with triphenylphosphine oxide. However, a small sample of **19** was purified by PTLC (1:1 EtOAc:hexanes  $\times 2$ ) for characterization purposes:  $^1\text{H}$  NMR ( $\text{CDCl}_3$ , 500 MHz)  $\delta$  7.38 (d,  $J = 7.0$  Hz, 2H), 7.25–7.34 (m, 7H), 7.21 (d,  $J = 7.0$  Hz, 1H), 6.82 (d,  $J = 8.0$  Hz, 1H), 6.73 (t,  $J = 8.0$  Hz, 1H), 6.67 (d,  $J = 7.0$  Hz, 1H), 5.62 (dd,  $J = 10, 3.5$  Hz, 1H), 5.39 (d,  $J = 10$  Hz, 1H), 5.12 (s, 2H), 4.95 (d,  $J = 14.5$  Hz, 1H), 4.41 (d,

$J = 15$  Hz, 1H), 3.78 (s, 1H), 3.50 (d,  $J = 3.0$  Hz, 1H), 3.35–3.43 (m, 2H), 2.34 (dd,  $J = 18, 5.5$  Hz, 1H), 2.09–2.16 (m, 1H), 1.65–1.74 (m, 2H), 1.25–1.35 (m, 3H), 1.37–1.41 (m, 1H), 1.05–1.11 (m, 1H), 0.86–0.90 (m, 2H), 0.73 (t,  $J = 7.5$  Hz, 3H);  $^{13}\text{C}$  NMR ( $\text{CDCl}_3$ , 150 MHz)  $\delta$  169.2, 145.7, 139.0, 138.6, 136.9, 134.0, 129.8, 128.6, 128.5, 128.4, 128.0, 127.9, 127.5, 127.3, 119.9, 115.7, 112.9, 70.5, 64.6, 62.9, 53.8, 52.8, 42.6, 39.7, 36.9, 33.6, 29.6, 28.6, 7.8; IR (film)  $\nu_{\text{max}}$  3233, 2977, 2787, 2361, 1716, 1618,  $\text{cm}^{-1}$ ; ESI-TOF HRMS  $m/z$  491.2685 ( $\text{M}+\text{H}^+$ ,  $\text{C}_{33}\text{H}_{34}\text{N}_2\text{O}_2$  requires 491.2693).

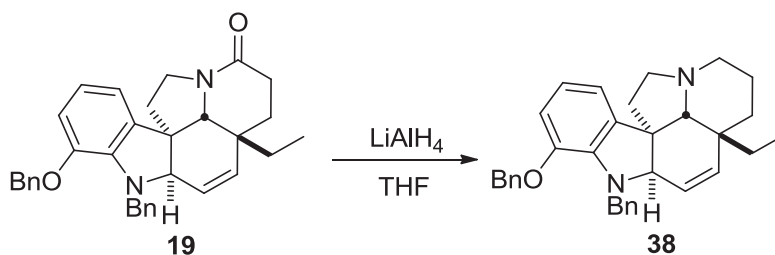

A solution of **19** (0.0755 mmol) in anhydrous THF (5.0 mL) at 23 °C was treated with  $\text{LiAlH}_4$  (1 M in THF, 0.604 mL, 0.604 mmol). The reaction mixture was warmed at 70 °C and stirred for 5 h, after which the reaction was quenched with the addition of  $\text{H}_2\text{O}$ . The resulting mixture was diluted with EtOAc, washed with saturated aqueous NaCl, dried ( $\text{Na}_2\text{SO}_4$ ), and concentrated under reduced pressure. The residue was purified by PTLC (5% MeOH/ $\text{CH}_2\text{Cl}_2$ ) to provide **38** (25.0 mg, 70%) as a white solid:  $^1\text{H}$  NMR ( $\text{CDCl}_3$ , 600 MHz)  $\delta$  7.52 (d,  $J = 6.6$  Hz, 4H), 7.32 (m, 2H), 7.21–7.29 (m, 4H), 6.66–6.75 (m, 3H), 5.68–5.71 (m, 1H), 5.60 (d,  $J = 9.0$  Hz, 1H), 5.07 (q,  $J = 11$  Hz, 2H), 4.93 (d,  $J = 14$  Hz, 1H), 4.49 (d,  $J = 14$  Hz, 1H), 3.76 (s, 1H), 3.00–3.05 (m, 2H), 2.18–2.24 (m, 2H), 1.93–1.97 (m, 1H), 1.53–1.82 (m, 3H), 1.28–1.35 (m, 1H), 1.09–1.13 (m, 2H), 0.92–0.96 (m, 1H), 0.82–0.87 (m, 1H), 0.64 (t,  $J = 7.8$  Hz, 3H);  $^{13}\text{C}$  NMR ( $\text{CDCl}_3$ , 150 MHz)  $\delta$  144.9, 138.9, 135.5, 134.3, 133.6, 131.7, 131.0, 128.4, 128.1, 127.7, 127.4, 126.8, 126.1, 119.1, 116.6, 112.4, 73.6, 70.5, 69.0, 53.8, 52.9, 52.6, 44.7, 38.5, 35.3, 34.1, 29.7, 23.0, 7.6; IR (film)  $\nu_{\text{max}}$  2927, 2854, 1670  $\text{cm}^{-1}$ ; ESI-TOF HRMS  $m/z$  477.2895 ( $\text{M}+\text{H}^+$ ,  $\text{C}_{33}\text{H}_{37}\text{N}_2\text{O}$  requires 477.2906).

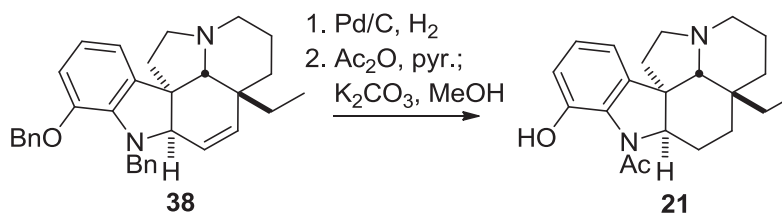

A solution of **38** (9.7 mg, 0.02035 mmol) in 2:1 anhydrous MeOH: $\text{CH}_2\text{Cl}_2$  (5.0 mL) at 23 °C was treated with 10% Pd/C (40 mg).  $\text{H}_2$  gas was bubbled through the reaction mixture for 10 min and then stirred for 3 h, after which the solution was filtered through a pad of Celite. The catalyst was washed ( $4 \times 5$  mL) with 1:1 MeOH: $\text{CH}_2\text{Cl}_2$ , and then the catalyst was re-suspended in 1:1 MeOH: $\text{CH}_2\text{Cl}_2$  (5 mL). The solution was sonicated for 5 min and then was filtered through a pad of Celite. The resulting filtrates were combined and concentrated under reduced pressure to afford the crude product **20**. Crude **20** was dissolved in pyridine (2.5 mL) and treated with  $\text{Ac}_2\text{O}$  (25 drops) at 23 °C. The reaction mixture was stirred for 18 h, after which the solvent was removed under a stream of  $\text{N}_2$ . The resulting residue was dissolved in aqueous MeOH and  $\text{K}_2\text{CO}_3$  (30 mg, 0.216 mmol) was added. The reaction mixture was stirred for 2 h, after which it was diluted with EtOAc, washed with saturated aqueous NaCl, dried ( $\text{Na}_2\text{SO}_4$ ), and concentrated under reduced pressure. The residue was purified by PTLC (5% MeOH/ $\text{CH}_2\text{Cl}_2$ ) to provide **21** (3.9 mg, 57% over 2 steps) as a white solid:  $^1\text{H}$  NMR ( $\text{CDCl}_3$ , 600 MHz)  $\delta$  10.88 (s, 1H), 7.05 (t,  $J = 7.8$  Hz, 1H), 6.81 (d,  $J = 7.8$  Hz, 1H), 6.70 (d,  $J = 7.2$  Hz, 1H), 4.06–4.09 (m, 1H), 3.14 (t,  $J = 7.2$  Hz, 1H), 3.06 (t,  $J = 10$  Hz, 1H), 2.32 (s, 3H), 2.26–2.30 (m, 2H), 2.05–2.07 (m, 1H), 1.95–1.99 (m, 2H), 1.84–1.87 (m, 1H), 1.51–1.71 (m, 4H), 1.33–1.37 (m, 1H), 1.08–1.17 (m, 2H), 0.82–0.89 (m, 2H), 0.63 (t,  $J = 7.2$  Hz, 3H);  $^{13}\text{C}$  NMR ( $\text{CDCl}_3$ , 150 MHz)  $\delta$  169.2, 147.2, 141.2, 127.8,

126.9, 117.5, 113.5, 70.9, 69.7, 53.7, 52.8, 52.5, 39.1, 35.5, 34.0, 30.1, 29.7, 25.0, 22.7, 21.5, 6.8; IR (film)  $\nu_{\max}$  2928, 1630, 1598  $\text{cm}^{-1}$ ; ESI-TOF HRMS  $m/z$  341.2215 ( $\text{M}+\text{H}^+$ ,  $\text{C}_{21}\text{H}_{29}\text{N}_2\text{O}_2$  requires 341.2223).

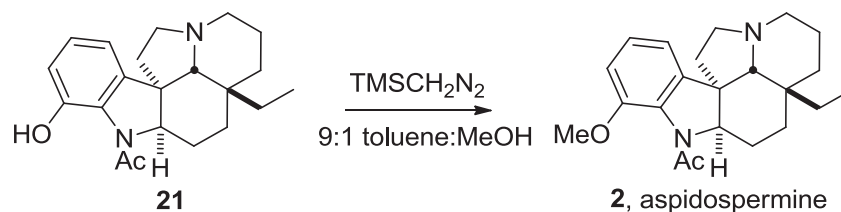

A solution of **21** (2.0 mg, 0.00587 mmol) in 9:1 toluene:MeOH (0.6 mL) at 23 °C was treated with  $\text{TMSCH}_2\text{N}_2$  (14.8  $\mu\text{L}$ , 0.0294 mmol, 2.0 M in  $\text{Et}_2\text{O}$ ). The reaction was stirred for 16 h, followed by the addition of 59  $\mu\text{L}$  of 2.0 M  $\text{TMSCH}_2\text{N}_2$ . The reaction was stirred for 24 h, and 150  $\mu\text{L}$  of 2.0 M  $\text{TMSCH}_2\text{N}_2$  was added. After 24 h of stirring, the reaction was complete. The solvent was removed under a stream of  $\text{N}_2$ , and the resulting residue was purified by PTLC (5% MeOH/  $\text{CH}_2\text{Cl}_2$ ) to provide **2** (1.4 mg, 67%) as a clear oil:  $^1\text{H}$  NMR ( $\text{CDCl}_3$ , 600 MHz)  $\delta$  7.07 (t,  $J = 7.8$  Hz, 1H), 6.77–6.84 (m, 2H), 4.65 (br s, 1H), 3.88 (s, 3H), 3.10–3.14 (m, 1H), 3.01–3.05 (m, 1H), 2.16–2.24 (m, 5H), 1.95–2.03 (m, 2H), 1.90–1.96 (m, 2H), 1.71–1.75 (m, 1H), 1.52–1.62 (m, 3H), 1.14–1.28 (m, 2H), 1.02–1.10 (m, 2H), 0.74–0.81 (m, 1H), 0.61 (t,  $J = 7.2$  Hz, 3H);  $^{13}\text{C}$  NMR ( $\text{CDCl}_3$ , 150 MHz)  $\delta$  171.5, 149.2, 143.9, 129.3, 126.0, 115.5, 110.9, 71.2, 69.5, 55.3, 53.6, 52.5, 38.0, 35.5, 34.2, 30.1, 29.7, 24.7, 23.1, 23.0, 21.6, 6.8; IR (film)  $\nu_{\max}$  2924, 2854, 1652  $\text{cm}^{-1}$ ; ESI-TOF HRMS  $m/z$  355.2388 ( $\text{M}+\text{H}^+$ ,  $\text{C}_{22}\text{H}_{30}\text{N}_2\text{O}_2$  requires 355.2380); data consistent with literature (*Spectroscopy Letters* **1993**, 26, 707; *Org. Lett.* **2003**, 5, 749; *Angew. Chem. Int. Ed.* **2007**, 46, 6159).

Racemic **2** was resolved by chiral phase HPLC ( $\alpha = 1.17$ , Chiralcel AD; 10% *i*-PrOH/hexanes; 7 mL/min).

**2**:  $[\alpha]_{\text{D}}^{23} -85$  ( $c$  0.071,  $\text{CHCl}_3$ ).

Lit:  $[\alpha]_{\text{D}}^{23} -90.5$  ( $c$  0.48,  $\text{CHCl}_3$ ), Reference 10m.

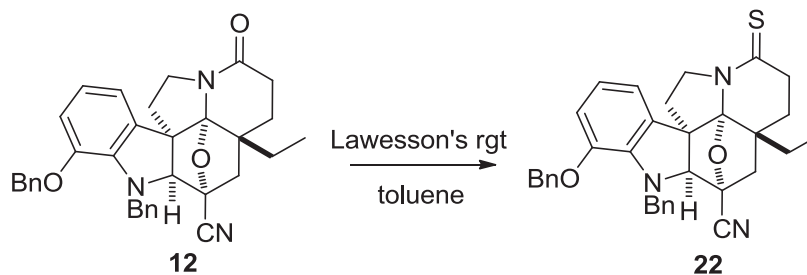

Lawesson's reagent (17.0 mg, 0.0421 mmol) was added to a solution of **12** (37.3 mg, 0.0702 mmol) in anhydrous toluene (treated with freshly activated 4 Å MS, 4 mL) at 23 °C under Ar. The reaction mixture was warmed to 80 °C for 1 h under microwave irradiation. The reaction mixture was concentrated under reduced pressure and purified by flash chromatography (10–20% EtOAc/hexanes) to provide **22** (33.8 mg, 88%) as a white solid:  $^1\text{H}$  NMR ( $\text{CDCl}_3$ , 400 MHz)  $\delta$  7.27–7.36 (m, 8H), 7.17–7.23 (m, 2H), 6.90 (d,  $J = 8.0$  Hz, 1H), 6.74 (dd,  $J = 8.0, 7.6$  Hz, 1H), 6.53 (d,  $J = 7.6$  Hz, 1H), 5.20 (d,  $J = 11.9$  Hz, 1H), 5.13 (d,  $J = 11.9$  Hz, 1H), 4.97 (d,  $J = 15.2$  Hz, 1H), 4.59 (d,  $J = 15.2$  Hz, 1H), 4.29 (s, 1H), 4.13–4.30 (m, 2H), 3.08 (dd,  $J = 4.9, 19.8$  Hz, 1H), 2.67–2.80 (m, 1H), 2.44 (d,  $J = 12.5$  Hz, 1H), 2.18–2.29 (m, 1H), 2.22 (dd,  $J = 12.6, 7.9$  Hz, 1H), 2.03–2.14 (m, 1H), 1.87 (d,  $J = 12.5$  Hz, 1H), 1.68 (m, 1H), 0.76–0.91 (m, 2H), 0.58 (t,  $J = 7.4$  Hz, 3H), 0.05–0.17 (m, 1H);  $^{13}\text{C}$  NMR ( $\text{CDCl}_3$ , 100 MHz)  $\delta$  202.4, 145.6, 140.4, 137.6, 136.4, 130.2, 128.7, 128.6, 128.4, 128.1, 127.7, 127.3, 121.2, 117.5, 117.0, 114.3, 105.2, 82.6, 74.8, 70.7, 65.3, 54.5, 44.2, 40.5, 39.0, 36.6, 29.7, 28.0, 22.0, 9.8; ESI-TOF HRMS  $m/z$  548.2392 ( $\text{M}+\text{H}^+$ ,  $\text{C}_{34}\text{H}_{34}\text{N}_3\text{O}_2\text{S}$  requires 548.2366).

(–)-**22**:  $[\alpha]_{\text{D}}^{23} -124$  ( $c$  1.00,  $\text{CH}_2\text{Cl}_2$ ).

ent-(+)-**22**:  $[\alpha]_{\text{D}}^{23} +127$  ( $c$  2.27,  $\text{CH}_2\text{Cl}_2$ ).

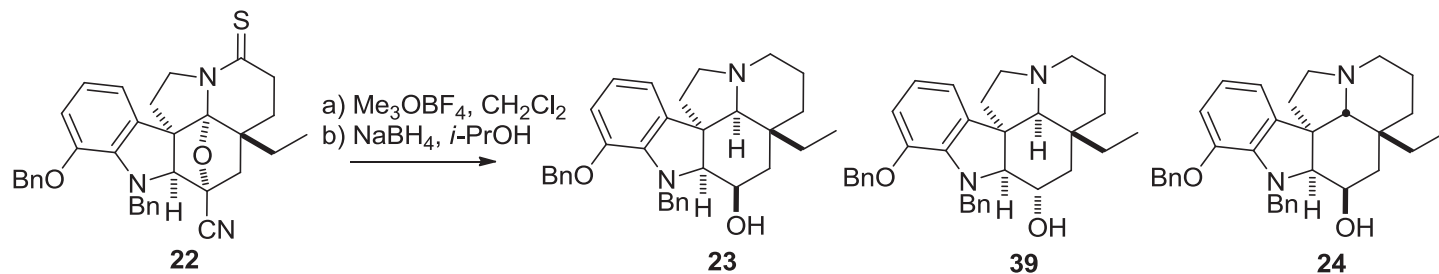

Trimethyloxonium tetrafluoroborate (71.8 mg, 0.485 mmol) was added to a solution of **22** (133.0 mg, 0.243 mmol) in  $\text{CH}_2\text{Cl}_2$  (5 mL) at 0 °C, and the reaction mixture was warmed to 23 °C and stirred for 1.5 h. The solvent was removed in vacuo and the residue was dissolved in *i*-PrOH (5 mL) and cooled to 0 °C. The reaction mixture was treated with  $\text{NaBH}_4$  (55.1 mg, 1.46 mmol) in small portions, followed by stirring at 23 °C for 2 h. The reaction mixture was treated with 10% aqueous HCl, stirred for 5 min, and basified with the addition of 10% aqueous NaOH to pH~10. The reaction mixture was diluted with EtOAc, washed with  $\text{H}_2\text{O}$  and saturated aqueous NaCl, and dried ( $\text{Na}_2\text{SO}_4$ ). The solvent was removed under reduced pressure and the residue was purified by PTLC (5% MeOH/ $\text{CH}_2\text{Cl}_2$ ) to provide compounds **23** (119 mg, 65%), **39** (9 mg, 5%), and **24** (26 mg, 15%) as colorless oils.

For **23**:  $^1\text{H}$  NMR ( $\text{CDCl}_3$ , 400 MHz)  $\delta$  7.46 (d,  $J = 7.0$  Hz, 2H), 7.28–7.39 (m, 3H), 7.17–7.23 (m, 3H), 7.07–7.13 (m, 2H), 6.92–6.96 (m, 1H), 6.77–6.83 (m, 2H), 5.18 (s, 2H), 4.87 (d,  $J = 14.3$  Hz, 1H), 4.24 (d,  $J = 14.3$  Hz, 1H), 3.96–4.03 (m, 1H), 3.60 (d,  $J = 5.6$  Hz, 1H), 3.18–3.32 (m, 2H), 2.06–2.14 (m, 1H), 2.08 (s, 1H), 1.85–1.93 (m, 1H), 1.56–1.68 (m, 1H), 1.35–1.55 (m, 4H), 1.31 (dd,  $J = 14.0, 4.7$  Hz, 1H), 1.17–1.26 (m, 1H), 0.84 (dd,  $J = 13.0, 3.2$  Hz, 1H), 0.46–0.56 (m, 4H);  $^{13}\text{C}$  NMR ( $\text{CDCl}_3$ , 100 MHz)  $\delta$  146.5, 141.5, 139.1, 138.3, 137.1, 129.1, 128.5, 128.1, 127.9, 127.6, 127.2, 122.0, 119.6, 111.9, 74.8, 71.7, 70.5, 67.5, 57.3, 56.7, 53.5, 52.9, 41.0, 39.6, 35.3, 34.2, 24.3, 22.3, 7.7; ESI-TOF HRMS  $m/z$  495.3017 ( $\text{M}+\text{H}^+$ ,  $\text{C}_{33}\text{H}_{39}\text{N}_2\text{O}_2$  requires 495.3006).

For **39**:  $^1\text{H}$  NMR ( $\text{CDCl}_3$ , 400 MHz)  $\delta$  7.48 (d,  $J = 7.1$  Hz, 2H), 7.32–7.39 (m, 5H), 7.22–7.33 (m, 3H), 7.12 (dd,  $J = 6.6, 1.8$  Hz, 1H), 6.79–6.86 (m, 2H), 5.13 (dd,  $J = 15.1, 11.6$  Hz, 2H), 4.65 (d,  $J = 13.4$  Hz, 1H), 4.07 (d,  $J = 13.4$  Hz, 1H), 3.36–3.47 (m, 1H), 3.30 (dd,  $J = 9.0, 8.4$  Hz, 1H), 3.20–3.25 (m, 1H), 2.83 (d,  $J = 8.0$  Hz, 1H), 2.24 (dd,  $J = 10.2, 2.0$  Hz, 1H), 2.17 (s, 1H), 1.91–1.99 (m, 1H), 1.80–1.89 (m, 2H), 1.73–1.80 (m, 2H), 1.65–1.72 (m, 1H), 1.41–1.46 (m, 1H), 1.33–1.40 (m, 1H), 0.97–1.07 (m, 1H), 0.81 (t,  $J = 12.6$  Hz, 2H), 0.67 (dd,  $J = 13.0, 3.0$  Hz, 1H), 0.61 (t,  $J = 7.5$  Hz, 3H);  $^{13}\text{C}$  NMR ( $\text{CDCl}_3$ , 100 MHz)  $\delta$  148.5, 142.1, 140.5, 138.9, 137.2, 129.1, 128.7, 128.5, 127.9, 127.6, 127.5, 122.4, 119.4, 111.4, 76.1, 75.9, 71.8, 70.4, 56.8, 56.3, 54.4, 52.1, 41.2, 39.3, 36.3, 34.2, 21.9, 20.0, 7.8.

For **24**:  $^1\text{H}$  NMR ( $\text{CDCl}_3$ , 400 MHz)  $\delta$  7.36–7.43 (m, 2H), 7.19–7.36 (m, 8H), 6.77–6.84 (m, 2H), 6.71 (dd,  $J = 5.6, 2.7$  Hz, 1H), 5.13 (dd,  $J = 13.7, 11.8$  Hz, 2H), 4.83 (d,  $J = 14.2$  Hz, 1H), 4.50 (d,  $J = 14.2$  Hz, 1H), 3.84 (d,  $J = 4.6$  Hz, 1H), 3.39 (d,  $J = 5.5$  Hz, 1H), 2.96–3.05 (m, 2H), 2.15 (d,  $J = 9.1$  Hz, 1H), 2.08 (s, 1H), 1.85–1.94 (m, 1H), 1.78 (dd,  $J = 14.3, 4.0$  Hz, 2H), 1.65–1.74 (m, 2H), 1.57–1.65 (m, 1H), 0.96 (dd,  $J = 13.5, 4.5$  Hz, 1H), 0.73–0.84 (m, 1H), 0.67 (t,  $J = 7.2$  Hz, 3H);  $^{13}\text{C}$  NMR ( $\text{CDCl}_3$ , 100 MHz)  $\delta$  146.3, 141.0, 139.5, 139.0, 137.0, 128.7, 128.5, 128.3, 127.8, 127.4, 127.2, 121.5, 115.4, 111.6, 72.8, 72.3, 70.3, 67.5, 56.2, 53.6, 53.5, 52.9, 44.6, 35.2, 34.8, 33.2, 29.5, 21.7, 7.4.



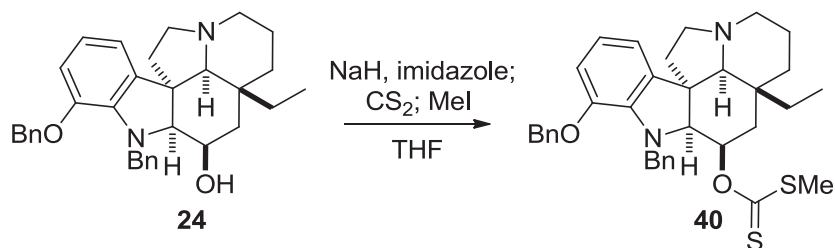

NaH (60% dispersion in mineral oil, 35.0 mg, 1.45 mmol) was added to 2 mL of distilled anhydrous THF and the mixture was stirred for 15 min. The THF was decanted and 2 mL of distilled anhydrous THF was added to the flask at 0 °C followed by addition of imidazole (2.0 mg, 0.0291 mmol) and **24** (72.0 mg, 0.146 mmol) in THF (0.5 mL, rinsed with THF 0.5 mL  $\times$  2). The reaction mixture was stirred at 0 °C for 1 h before CS<sub>2</sub> (70  $\mu$ L, 1.16 mmol) was added. The reaction mixture was warmed to room temperature and stirred for 1 h followed by the addition of MeI (73  $\mu$ L, 1.16 mmol). The reaction mixture was stirred for 1 h before being quenched by adding saturated aqueous NH<sub>4</sub>Cl. The solution was diluted with EtOAc, washed with saturated aqueous NaCl, and dried (Na<sub>2</sub>SO<sub>4</sub>). The solvent was removed under reduced pressure and the residue was purified by flash chromatography (25–80% EtOAc/hexane gradient) to provide **40** (70 mg, 83%) as a colorless oil and recovered starting material **24** (10 mg, 14%): <sup>1</sup>H NMR (CDCl<sub>3</sub>, 400 MHz)  $\delta$  7.39 (d,  $J$  = 7.0 Hz, 2H), 7.27–7.33 (m, 3H), 7.15–7.22 (m, 5H), 7.03 (d,  $J$  = 7.3 Hz, 1H), 6.75 (d,  $J$  = 7.9 Hz, 1H), 6.64 (dd,  $J$  = 7.9, 7.3 Hz, 1H), 6.16–6.22 (m, 1H), 5.35 (d,  $J$  = 15.3 Hz, 1H), 5.10 (d,  $J$  = 11.9 Hz, 1H), 5.06 (d,  $J$  = 11.9 Hz, 1H), 4.03 (d,  $J$  = 15.3 Hz, 1H), 3.69 (d,  $J$  = 4.9 Hz, 1H), 3.32 (dd,  $J$  = 9.8, 8.2 Hz, 1H), 3.25 (dd,  $J$  = 9.2, 1.2 Hz, 1H), 2.18–2.25 (m, 1H), 2.20 (s, 3H), 2.19 (s, 1H), 2.04–2.15 (m, 1H), 1.93–2.04 (m, 1H), 1.75–1.83 (m, 1H), 1.55–1.74 (m, 3H), 1.40–1.53 (m, 2H), 1.24–1.32 (m, 2H), 0.96–1.08 (m, 1H), 0.80 (dd,  $J$  = 13.0, 3.3 Hz, 1H), 0.56 (t,  $J$  = 7.5 Hz, 3H); <sup>13</sup>C NMR (CDCl<sub>3</sub>, 100 MHz)  $\delta$  214.8, 144.6, 139.5, 138.1, 137.4, 128.4, 128.3, 128.1, 127.7, 127.5, 126.8, 119.7, 119.0, 113.1, 80.8, 74.4, 71.0, 68.1, 57.0, 52.7, 52.6, 52.2, 41.2, 35.9, 34.2, 22.3, 22.1, 17.8, 7.6; ESI-TOF HRMS  $m/z$  585.2601 (M+H<sup>+</sup>, C<sub>35</sub>H<sub>41</sub>N<sub>2</sub>O<sub>2</sub>S<sub>2</sub> requires 585.2604).

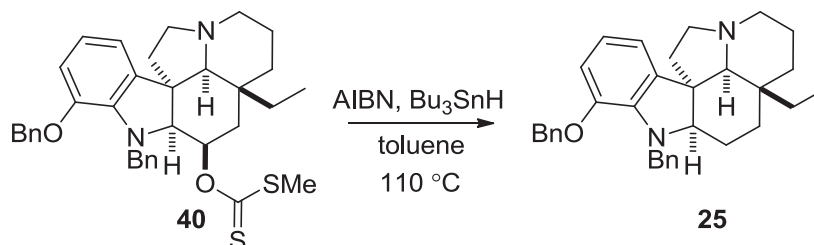

A solution of **40** (54.1 mg, 0.0925 mmol), AIBN (3.0 mg, 0.0185 mmol), and Bu<sub>3</sub>SnH (298  $\mu$ L, 1.11 mmol) in anhydrous toluene (5 mL) was degassed with argon for 30 min. The reaction mixture was warmed at 110 °C for 4 h, cooled to room temperature, and the product purified by flash chromatography (20–40% EtOAc/hexane gradient) to afford **25** (35 mg, 80%) as a clear oil: <sup>1</sup>H NMR (CDCl<sub>3</sub>, 400 MHz)  $\delta$  7.20–7.38 (m, 10H), 7.17 (dd,  $J$  = 7.4, 1.1 Hz, 1H), 6.76 (dd,  $J$  = 8.0, 1.1 Hz, 1H), 6.66 (dd,  $J$  = 8.0, 7.4 Hz, 1H), 5.07 (d,  $J$  = 11.7 Hz, 1H), 5.01 (d,  $J$  = 11.7 Hz, 1H), 4.97 (d,  $J$  = 15.9 Hz, 1H), 4.33 (d,  $J$  = 15.9 Hz, 1H), 3.22–3.30 (m, 2H), 3.08 (dd,  $J$  = 10.1, 5.8 Hz, 1H), 2.14–2.22 (m, 1H), 1.98 (s, 1H), 1.88–1.98 (m, 1H), 1.66–1.80 (m, 4H), 1.56–1.66 (m, 1H), 1.46–1.56 (m, 2H), 1.32–1.46 (m, 2H), 1.18–1.27 (m, 1H), 0.84–0.94 (m, 1H), 0.63–0.73 (m, 1H), 0.60 (t,  $J$  = 7.5 Hz, 3H); <sup>13</sup>C NMR (CDCl<sub>3</sub>, 100 MHz)  $\delta$  146.2, 140.6, 139.6, 138.2, 137.4, 128.3, 128.1, 128.0, 127.6, 127.4, 126.6, 120.5, 119.1, 112.5, 75.6, 70.9, 68.1, 56.9, 52.6, 51.8, 51.7, 36.7, 34.3, 32.5, 27.8, 25.7, 22.3, 19.1, 7.8; ESI-TOF HRMS  $m/z$  479.3046 (M+H<sup>+</sup>, C<sub>33</sub>H<sub>39</sub>N<sub>2</sub>O requires 479.3057).



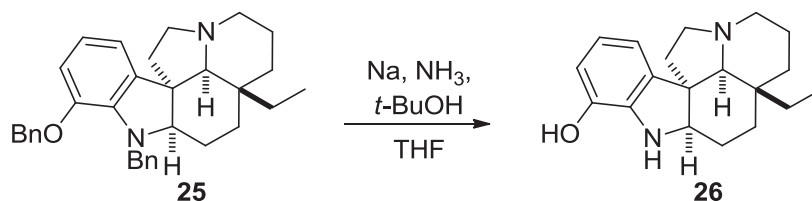

In a vial,  $\text{NH}_3$  was condensed at  $-78\text{ }^\circ\text{C}$  to a volume of  $\sim 1\text{ mL}$ .  $\text{Na}$  (19 mg, 0.84 mmol), freshly cut and washed with hexanes, was added to the vial and a dark blue color appeared immediately. After 3 to 5 min of stirring, a solution of  $t\text{-BuOH}$  in distilled anhydrous THF (0.041 mL  $t\text{-BuOH}$  in 0.25 mL THF) was added to the blue mixture followed by the addition of a solution of **25** (10 mg, 0.021 mmol) in distilled anhydrous THF (0.5 mL). The reaction mixture was stirred until the dark blue color turned white. Ammonium chloride (0.14 g) was added to quench the reaction and the reaction mixture was uncapped and warmed to room temperature. After evaporation of the  $\text{NH}_3$ , the reaction product was purified by PTLC (10% MeOH/ $\text{CH}_2\text{Cl}_2 \times 2$ ) to afford **26** (3.7 mg, 60%):  $^1\text{H NMR}$  ( $\text{CDCl}_3$ , 400 MHz)  $\delta$  7.10 (d,  $J = 6.6\text{ Hz}$ , 1H), 6.64 (dd,  $J = 7.6, 6.6\text{ Hz}$ , 1H), 6.58 (d,  $J = 7.6\text{ Hz}$ , 1H), 4.55 (br s, 1H), 3.49 (s, 1H), 3.38–3.48 (m, 1H), 3.26–3.38 (m, 2H), 2.33 (t,  $J = 10.0\text{ Hz}$ , 1H), 2.13 (s, 1H), 2.01–2.10 (m, 1H), 1.86–1.96 (m, 1H), 1.72–1.86 (m, 2H), 1.54–1.70 (m, 4H), 1.45–1.53 (m, 1H), 1.30–1.44 (m, 1H), 1.10–1.21 (m, 1H), 0.84 (dd,  $J = 13.7, 3.0\text{ Hz}$ , 1H), 0.61–0.71 (m, 1H), 0.58 (t,  $J = 6.5\text{ Hz}$ , 3H);  $^{13}\text{C NMR}$  ( $\text{CDCl}_3$ , 100 MHz)  $\delta$  143.2, 137.7, 136.2, 120.8, 119.4, 114.6, 75.4, 65.4, 56.9, 53.2, 51.9, 39.5, 36.8, 34.2, 32.5, 28.8, 22.1, 18.9, 7.7; ESI-TOF HRMS  $m/z$  299.2111 ( $\text{M}+\text{H}^+$ ,  $\text{C}_{19}\text{H}_{27}\text{N}_2\text{O}$  requires 299.2118).

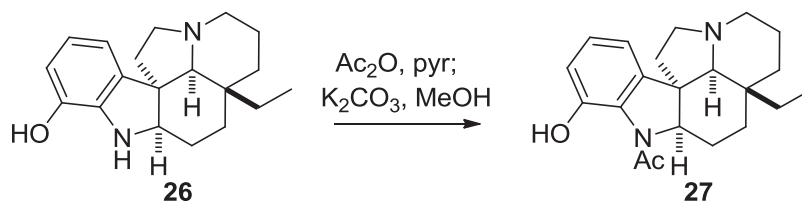

A solution of **26** (5.9 mg, 0.020 mmol) in pyridine (1 mL) at  $23\text{ }^\circ\text{C}$  was treated with  $\text{Ac}_2\text{O}$  (18.7  $\mu\text{L}$ , 0.198 mmol). The reaction mixture was stirred for 18 h, after which the solvent was removed under a stream of  $\text{N}_2$ . The resulting residue was dissolved in wet methanol and  $\text{K}_2\text{CO}_3$  (28 mg, 0.198 mmol) was added. The reaction mixture was stirred for 2 h, after which it was diluted with EtOAc, washed with saturated aqueous  $\text{NaCl}$ , dried ( $\text{Na}_2\text{SO}_4$ ), and concentrated under reduced pressure. The residue was purified by PTLC (5% MeOH/ $\text{CH}_2\text{Cl}_2$ ) to provide **27** (5.4 mg, 80%) as a white solid:  $^1\text{H NMR}$  ( $\text{CDCl}_3$ , 600 MHz)  $\delta$  10.83 (s, 1H), 7.17 (d,  $J = 7.2\text{ Hz}$ , 1H), 7.00 (t,  $J = 7.8\text{ Hz}$ , 1H), 6.79 (d,  $J = 7.8\text{ Hz}$ , 1H), 3.90–3.94 (m, 1H), 3.20–3.40 (m, 2H), 2.33 (s, 3H), 2.08–2.12 (m, 2H), 2.00–2.04 (m, 1H), 1.82–1.92 (m, 2H), 1.69–1.73 (m, 2H), 1.61–1.64 (m, 2H), 1.48–1.55 (m, 2H), 0.99–1.02 (m, 1H), 0.86–0.91 (m, 2H), 0.62–0.67 (m, 1H), 0.59 (t,  $J = 7.2\text{ Hz}$ , 3H);  $^{13}\text{C NMR}$  ( $\text{CDCl}_3$ , 150 MHz)  $\delta$  168.2, 147.0, 140.5, 127.3, 126.3, 117.9, 117.2, 75.4, 69.0, 56.7, 51.4, 51.3, 39.6, 36.6, 34.1, 32.4, 26.4, 22.8, 22.0, 19.3, 7.7; ESI-TOF HRMS  $m/z$  341.2235 ( $\text{M}+\text{H}^+$ ,  $\text{C}_{21}\text{H}_{29}\text{N}_2\text{O}_2$  requires 341.2223).

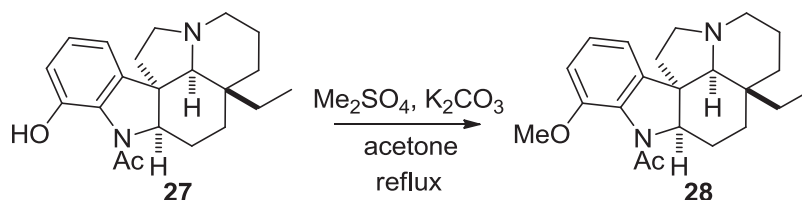

A solution of **27** (2.6 mg, 0.0077 mmol) and  $\text{K}_2\text{CO}_3$  (10.8 mg, 0.077 mmol) in acetone (1 mL) was treated with  $\text{Me}_2\text{SO}_4$  (7.3  $\mu\text{L}$ , 0.077 mmol) and the reaction mixture was warmed at reflux for 18 h. The solution was diluted with  $\text{CH}_2\text{Cl}_2$ , washed with saturated aqueous  $\text{NaCl}$ , dried ( $\text{Na}_2\text{SO}_4$ ), and concentrated under reduced pressure. The residue was purified by PTLC (5% MeOH/ $\text{CH}_2\text{Cl}_2$ ) to provide **28** (1.4 mg, 52%) as a white solid:  $^1\text{H NMR}$

(CDCl<sub>3</sub>, 600 MHz)  $\delta$  7.29 (s, 1H), 7.02 (m, 1H), 6.80 (d,  $J = 7.2$  Hz, 1H), 4.60 (m, 1H), 3.86 (s, 3H), 3.24–3.33 (m, 2H), 2.31 (t,  $J = 10.8$  Hz, 1H), 2.17 (s, 3H), 1.78–1.95 (m, 4H), 1.46–1.71 (m, 5H), 1.25–1.31 (m, 1H), 0.86–0.89 (m, 2H), 0.75–0.82 (m, 1H), 0.61–0.68 (m, 1H), 0.57 (t,  $J = 7.2$  Hz, 3H); <sup>13</sup>C NMR (CDCl<sub>3</sub>, 150 MHz)  $\delta$  171.3, 149.4, 142.9, 128.8, 125.4, 119.7, 110.7, 75.8, 68.2, 56.7, 55.3, 51.4, 38.6, 36.6, 34.1, 32.4, 29.7, 25.9, 23.1, 22.1, 19.3, 7.8; ESI-TOF HRMS  $m/z$  355.2393 (M+H<sup>+</sup>, C<sub>22</sub>H<sub>31</sub>N<sub>2</sub>O<sub>2</sub> requires 355.2380).

The structure and relative stereochemistry of **28** were established with a single crystal X-ray structure determination (CCDC850757) conducted on white needles grown from 1:1 hexanes:CH<sub>2</sub>Cl<sub>2</sub>.

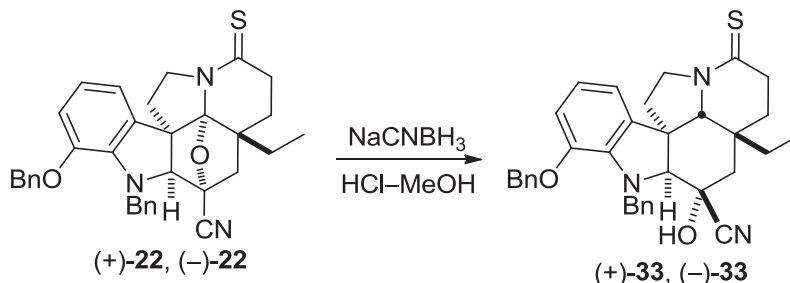

A solution of (–)-**22** (60 mg, 0.110 mmol) in MeOH (3 mL) was treated with acetyl chloride (5 drops) at 23 °C under argon. After 30 min of stirring (liberation of HCl), NaCNBH<sub>3</sub> (65.1 mg, 0.658 mmol) was added and the reaction mixture was stirred for 2 h at 23 °C. The reaction mixture was quenched with the addition of saturated aqueous NaHCO<sub>3</sub>, and the organic layer was extracted with EtOAc, washed with saturated aqueous NaCl, dried (Na<sub>2</sub>SO<sub>4</sub>), and concentrated under reduced pressure. The residue was purified by flash chromatography (5% MeOH/CH<sub>2</sub>Cl<sub>2</sub>) to provide (–)-**33** as a white solid (58.0 mg, 96%): <sup>1</sup>H NMR (THF-d<sub>8</sub>, 600 MHz)  $\delta$  7.49 (d,  $J = 7.2$  Hz, 2H), 7.33 (t,  $J = 7.2$  Hz, 2H), 7.22–7.27 (m, 4H), 7.16 (d,  $J = 7.2$  Hz, 2H), 6.94 (d,  $J = 8.4$  Hz, 1H), 6.75 (t,  $J = 7.8$  Hz, 1H), 6.71 (t,  $J = 7.2$  Hz, 1H), 5.97 (br s, 1H), 5.54 (d,  $J = 15$  Hz, 1H), 5.25 (d,  $J = 12$  Hz, 1H), 5.21 (d,  $J = 12$  Hz, 1H), 4.38 (d,  $J = 15$  Hz, 1H), 3.84–3.87 (m, 1H), 3.74 (s, 1H), 3.30 (s, 1H), 3.23–3.28 (m, 1H), 2.74–2.78 (m, 1H), 2.51–2.57 (m, 2H), 1.77–1.81 (m, 1H), 1.67–1.71 (m, 2H), 1.57–1.63 (m, 2H), 1.17–1.22 (m, 2H), 0.78–0.81 (m, 1H), 0.75 (t,  $J = 7.2$  Hz, 3H); <sup>13</sup>C NMR (THF-d<sub>8</sub>, 150 MHz)  $\delta$  197.4, 147.1, 140.0, 139.4, 138.6, 135.5, 130.3, 129.4, 129.3, 128.74, 128.72, 128.5, 123.0, 122.0, 116.9, 115.8, 73.2, 72.1, 71.6, 68.1, 56.1, 54.5, 50.5, 40.4, 39.9, 38.2, 36.5, 33.8, 32.0, 7.9; IR (film)  $\nu_{\text{max}}$  3174, 2939, 1592 cm<sup>-1</sup>; ESI-TOF HRMS  $m/z$  550.2529 (M+H<sup>+</sup>, C<sub>34</sub>H<sub>35</sub>N<sub>3</sub>O<sub>2</sub>S requires 550.2523).

(–)-**33**:  $[\alpha]_{\text{D}}^{23} -14$  ( $c$  1.4, CH<sub>2</sub>Cl<sub>2</sub>).

*ent*-(+)-**33**:  $[\alpha]_{\text{D}}^{23} +14$  ( $c$  0.9, CH<sub>2</sub>Cl<sub>2</sub>).

The structure and absolute configuration of (–)-**33** were established with a single crystal X-ray structure determination (CCDC868362) conducted on white needles grown from 1:1 benzene:CH<sub>2</sub>Cl<sub>2</sub>.

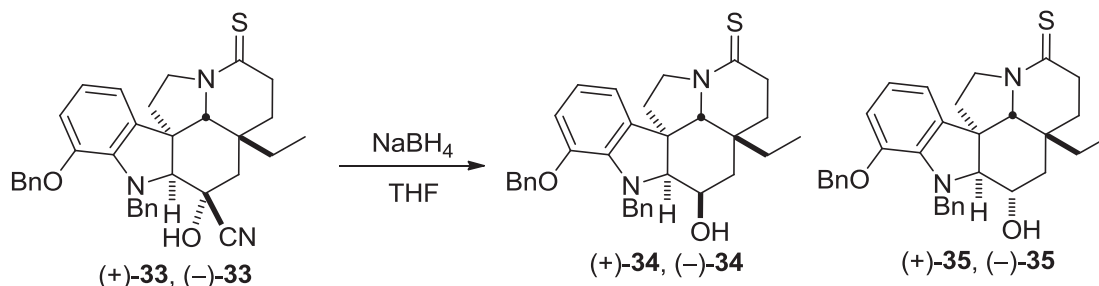

A solution of (+)-**33** (8.0 mg, 0.015 mmol) in anhydrous THF (1.0 mL) was treated with NaBH<sub>4</sub> (2.8 mg, 0.073 mmol) at 23 °C. The reaction mixture was stirred for 18 h, after which it was directly purified by PTLC (5% MeOH/CH<sub>2</sub>Cl<sub>2</sub>) to provide (+)-**34** (5.4 mg, 71%) and (+)-**35** (1.8 mg, 24%) as white solids:

For **34**:  $^1\text{H}$  NMR ( $\text{CDCl}_3$ , 500 MHz)  $\delta$  7.46 (d,  $J = 7.5$  Hz, 2H), 7.33–7.39 (m, 3H), 7.20–7.24 (m, 3H), 7.09 (d,  $J = 4.0$  Hz, 1H), 6.90 (d,  $J = 8.0$  Hz, 1H), 6.86 (t,  $J = 7.5$  Hz, 1H), 6.57 (d,  $J = 7.5$  Hz, 1H), 5.23 (d,  $J = 12$  Hz, 1H), 5.19 (d,  $J = 12$  Hz, 1H), 5.13 (d,  $J = 15$  Hz, 1H), 4.17 (d,  $J = 15$  Hz, 1H), 3.96 (dd,  $J = 14, 9$  Hz, 1H), 3.54–3.58 (m, 1H), 3.45 (dd,  $J = 14, 6.0$  Hz, 1H), 3.43 (s, 1H), 3.39 (d,  $J = 5.5$  Hz, 1H), 2.93 (dt,  $J = 18, 5.0$  Hz, 1H), 2.66 (d,  $J = 9.0$  Hz, 1H), 2.60–2.65 (m, 1H), 1.61–1.70 (m, 2H), 1.44–1.50 (m, 1H), 1.26–1.28 (m, 1H), 1.15 (sept,  $J = 7.0$  Hz, 1H), 1.08 (sept,  $J = 7.0$  Hz, 1H), 0.86 (dd,  $J = 13, 6.5$  Hz, 1H), 0.70 (t,  $J = 7.0$  Hz, 3H);  $^{13}\text{C}$  NMR ( $\text{CDCl}_3$ , 150 MHz)  $\delta$  198.9, 146.7, 140.0, 137.7, 136.6, 135.4, 129.3, 128.6, 128.5, 128.2, 127.8, 127.7, 122.1, 115.4, 113.1, 70.8, 68.3, 66.9, 66.7, 56.1, 55.8, 50.1, 39.3, 38.8, 36.1, 34.9, 33.0, 30.0, 7.5; IR (film)  $\nu_{\text{max}}$  3364, 2931, 2360, 1739, 1592  $\text{cm}^{-1}$ ; ESI-TOF HRMS  $m/z$  525.2576 ( $\text{M}+\text{H}^+$ ,  $\text{C}_{33}\text{H}_{37}\text{N}_2\text{O}_2\text{S}$  requires 525.2570).

(-)-**34**:  $[\alpha]_{\text{D}}^{23} -8.5$  ( $c$  0.90,  $\text{CH}_2\text{Cl}_2$ ).

ent-(+)-**34**:  $[\alpha]_{\text{D}}^{23} +7.4$  ( $c$  0.92,  $\text{CH}_2\text{Cl}_2$ ).

For **35**:  $^1\text{H}$  NMR ( $\text{CDCl}_3$ , 500 MHz)  $\delta$  7.46 (d,  $J = 7.0$  Hz, 2H), 7.27–7.38 (m, 8H), 6.90 (d,  $J = 8.0$  Hz, 1H), 6.85 (t,  $J = 7.5$  Hz, 1H), 6.63 (d,  $J = 7.5$  Hz, 1H), 5.18 (s, 2H), 4.74 (d,  $J = 14$  Hz, 1H), 4.53 (d,  $J = 14$  Hz, 1H), 3.96 (dd,  $J = 14, 9.5$  Hz, 1H), 3.72–3.75 (m, 1H), 3.70 (s, 1H), 3.50–3.52 (m, 1H), 3.03 (dd,  $J = 18, 6.5$  Hz, 1H), 2.85–2.92 (m, 1H), 2.80 (d,  $J = 8.5$  Hz, 1H), 1.55–1.67 (m, 4H), 1.42 (q,  $J = 8.0$  Hz, 2H), 1.20 (t,  $J = 13$  Hz, 1H), 1.03 (sept,  $J = 7.0$  Hz, 1H), 0.73 (t,  $J = 7.5$  Hz, 3H);  $^{13}\text{C}$  NMR ( $\text{CDCl}_3$ , 150 MHz)  $\delta$  197.0, 147.4, 139.9, 138.1, 136.6, 136.4, 129.0, 128.9, 128.6, 128.2, 127.9, 127.7, 121.9, 114.6, 112.7, 71.3, 70.7, 69.9, 67.7, 57.1, 56.3, 50.6, 38.5, 37.6, 36.5, 30.8, 30.1, 29.3, 6.9; IR (film)  $\nu_{\text{max}}$  3265, 2361, 1636  $\text{cm}^{-1}$ ; ESI-TOF HRMS  $m/z$  525.2576 ( $\text{M}+\text{H}^+$ ,  $\text{C}_{33}\text{H}_{37}\text{N}_2\text{O}_2\text{S}$  requires 525.2572).

(-)-**35**:  $[\alpha]_{\text{D}}^{23} -12$  ( $c$  0.11,  $\text{CH}_2\text{Cl}_2$ ).

ent-(+)-**35**:  $[\alpha]_{\text{D}}^{23} +11$  ( $c$  0.92,  $\text{CH}_2\text{Cl}_2$ ).

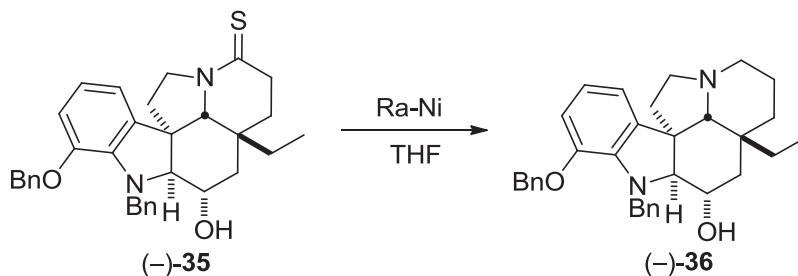

A solution of Raney nickel in  $\text{H}_2\text{O}$  was washed with  $\text{H}_2\text{O}$  (1 mL  $\times$  2), MeOH (1 mL  $\times$  2), and THF (1 mL  $\times$  2) and finally diluted with THF (1 mL). A solution of (-)-**35** (4.2 mg, 0.0080 mmol) in THF (1.0 mL) was treated with the Ra-Ni solution (2 drops) at 23  $^\circ\text{C}$ . The mixture was stirred rapidly for 4 h before being filtered through Celite. The Celite was washed with  $\text{CH}_2\text{Cl}_2$  (10 mL) and the filtrate concentrated under reduced pressure to provide (-)-**36** (3.8 mg, 97%).

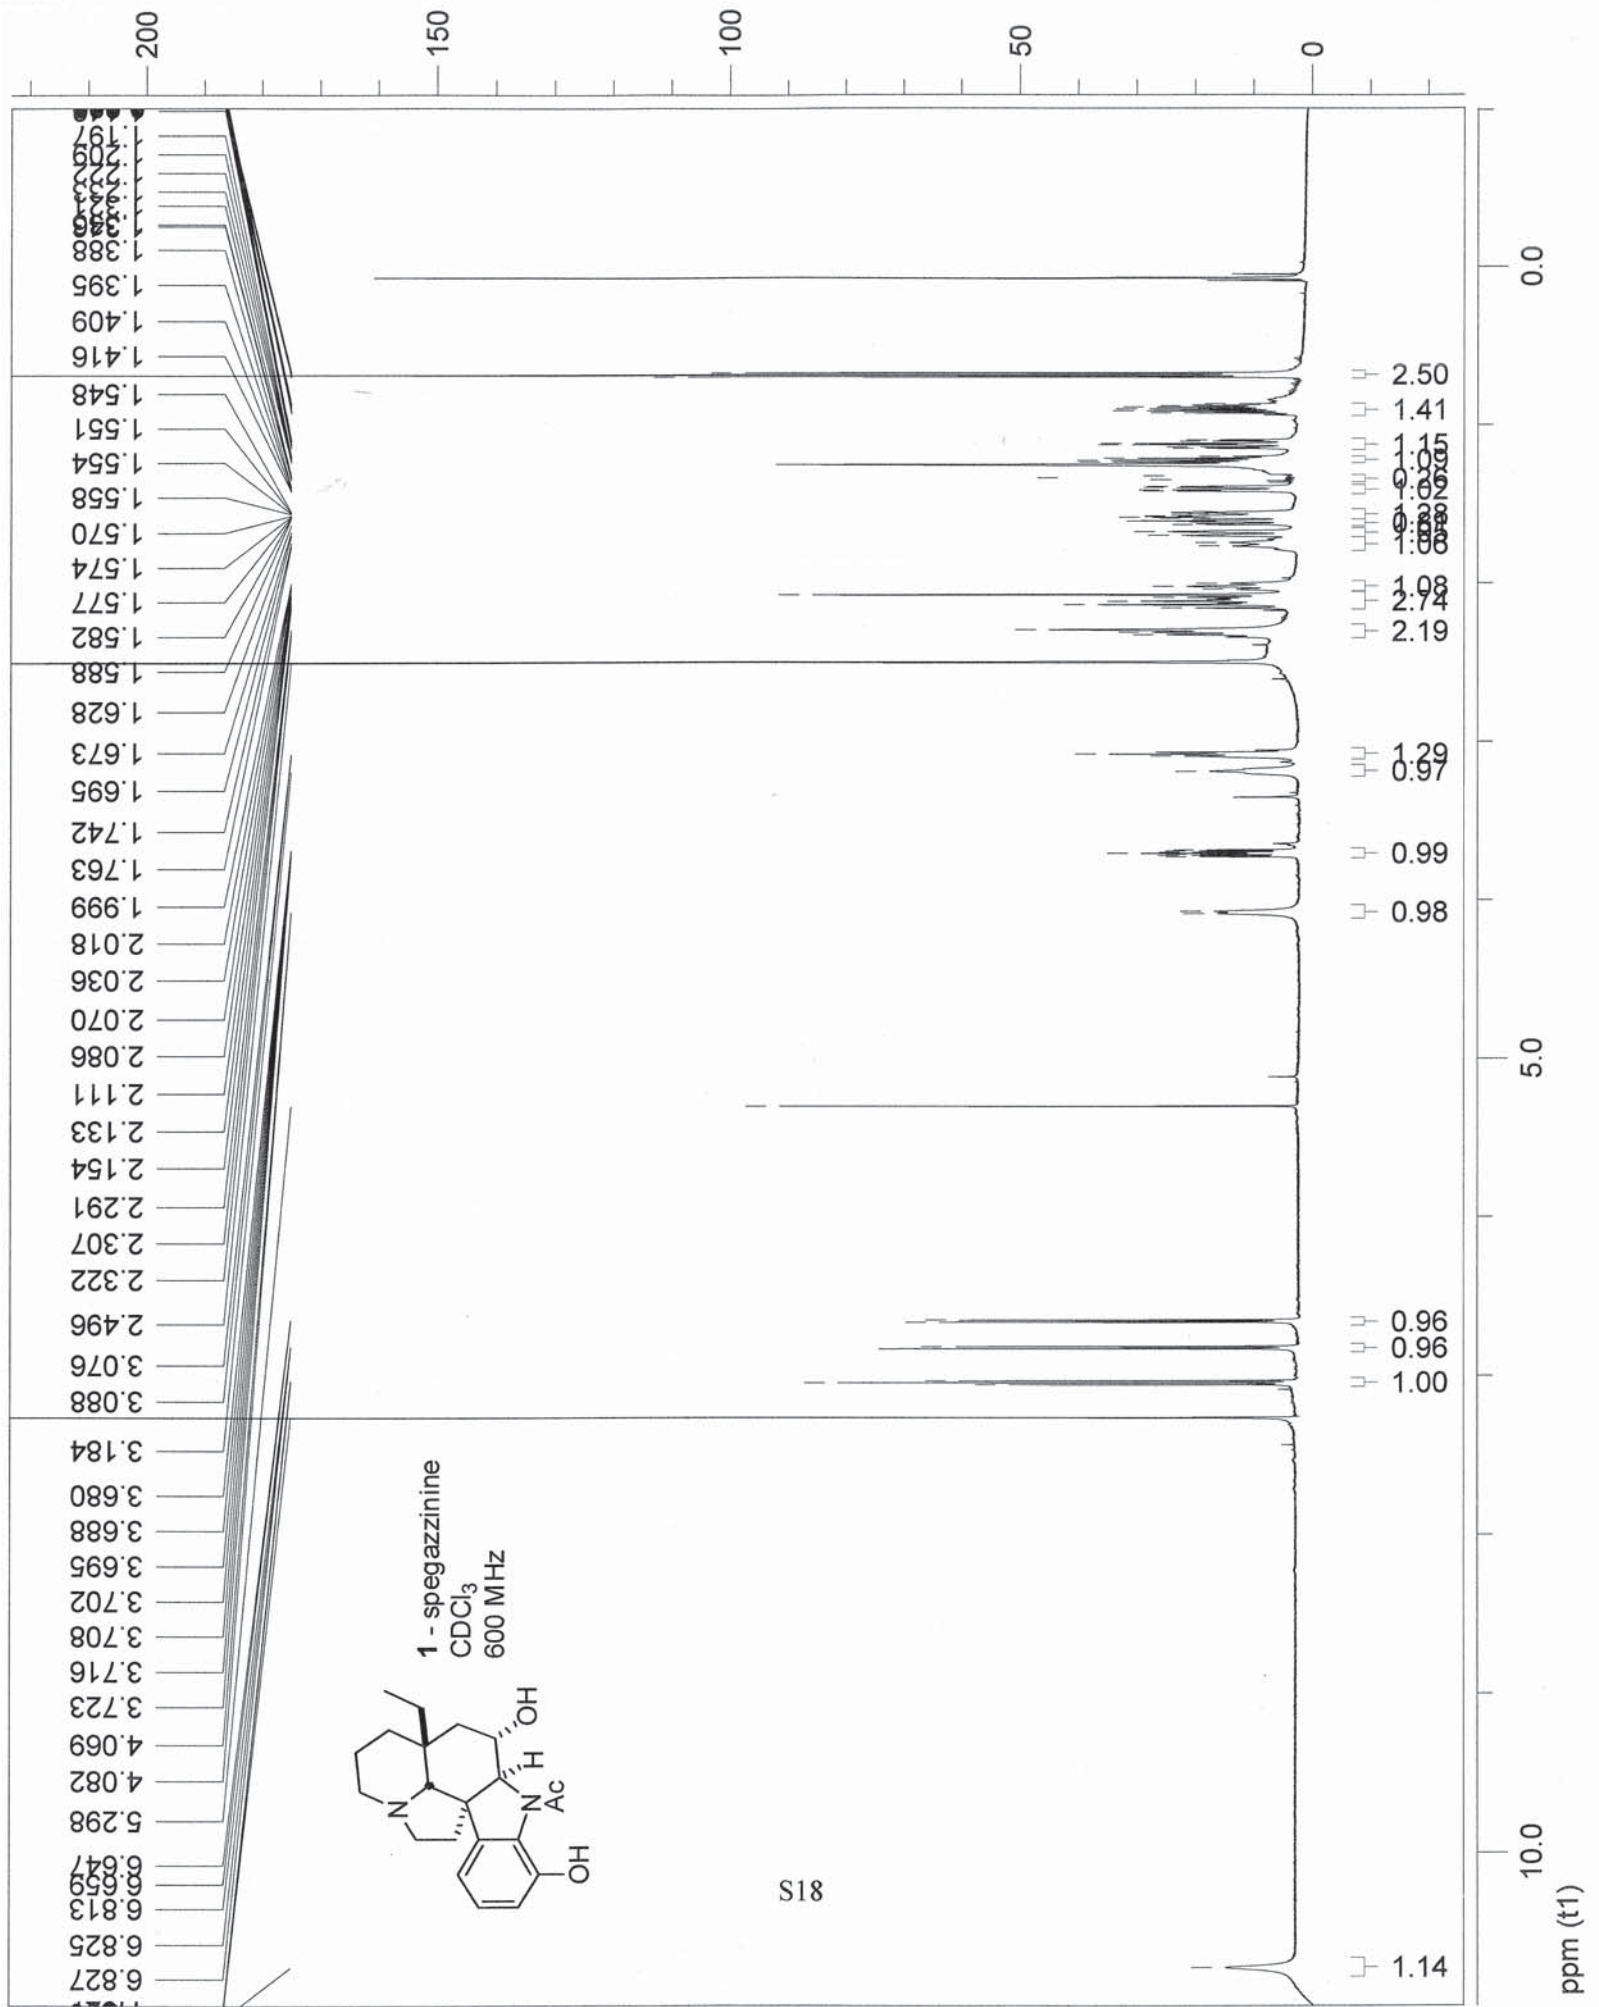

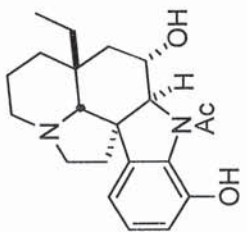

CDCl<sub>3</sub>  
150 MHz

615

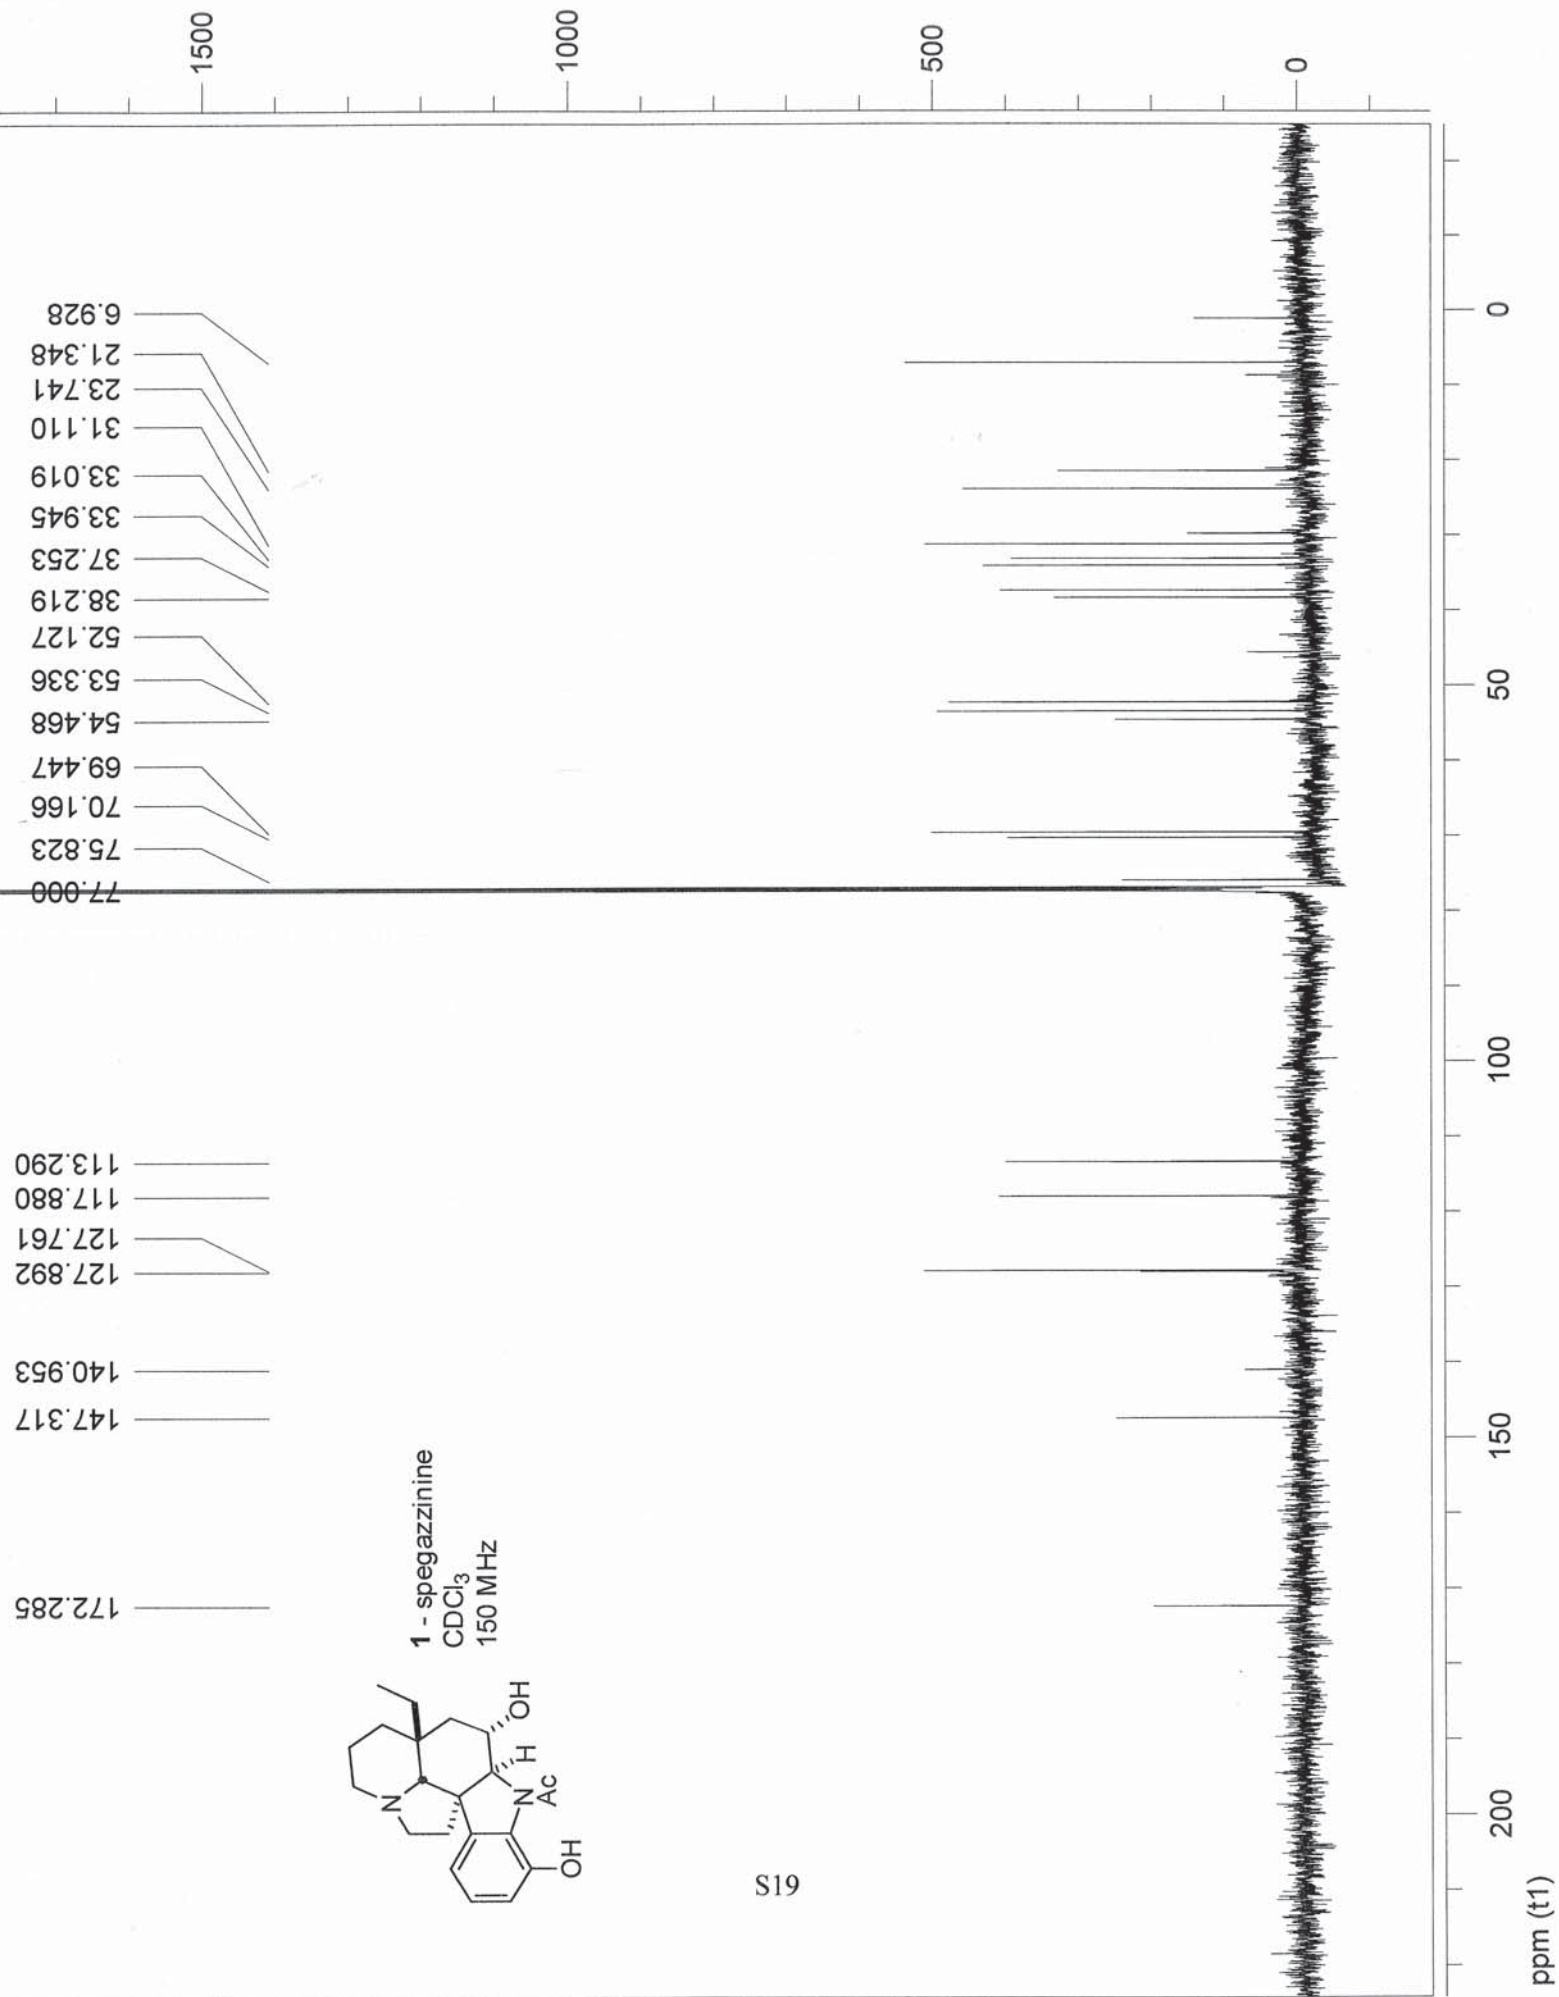







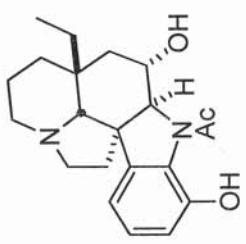

- 77.000
- 75.688
- 70.305
- 69.365
- 54.339
- 53.313
- 52.083
- 38.133
- 37.249
- 33.893
- 32.869
- 31.138
- 23.690
- 21.212
- 6.906

- 172.350
- 147.296
- 140.832
- 127.877
- 127.775
- 117.923
- 113.245

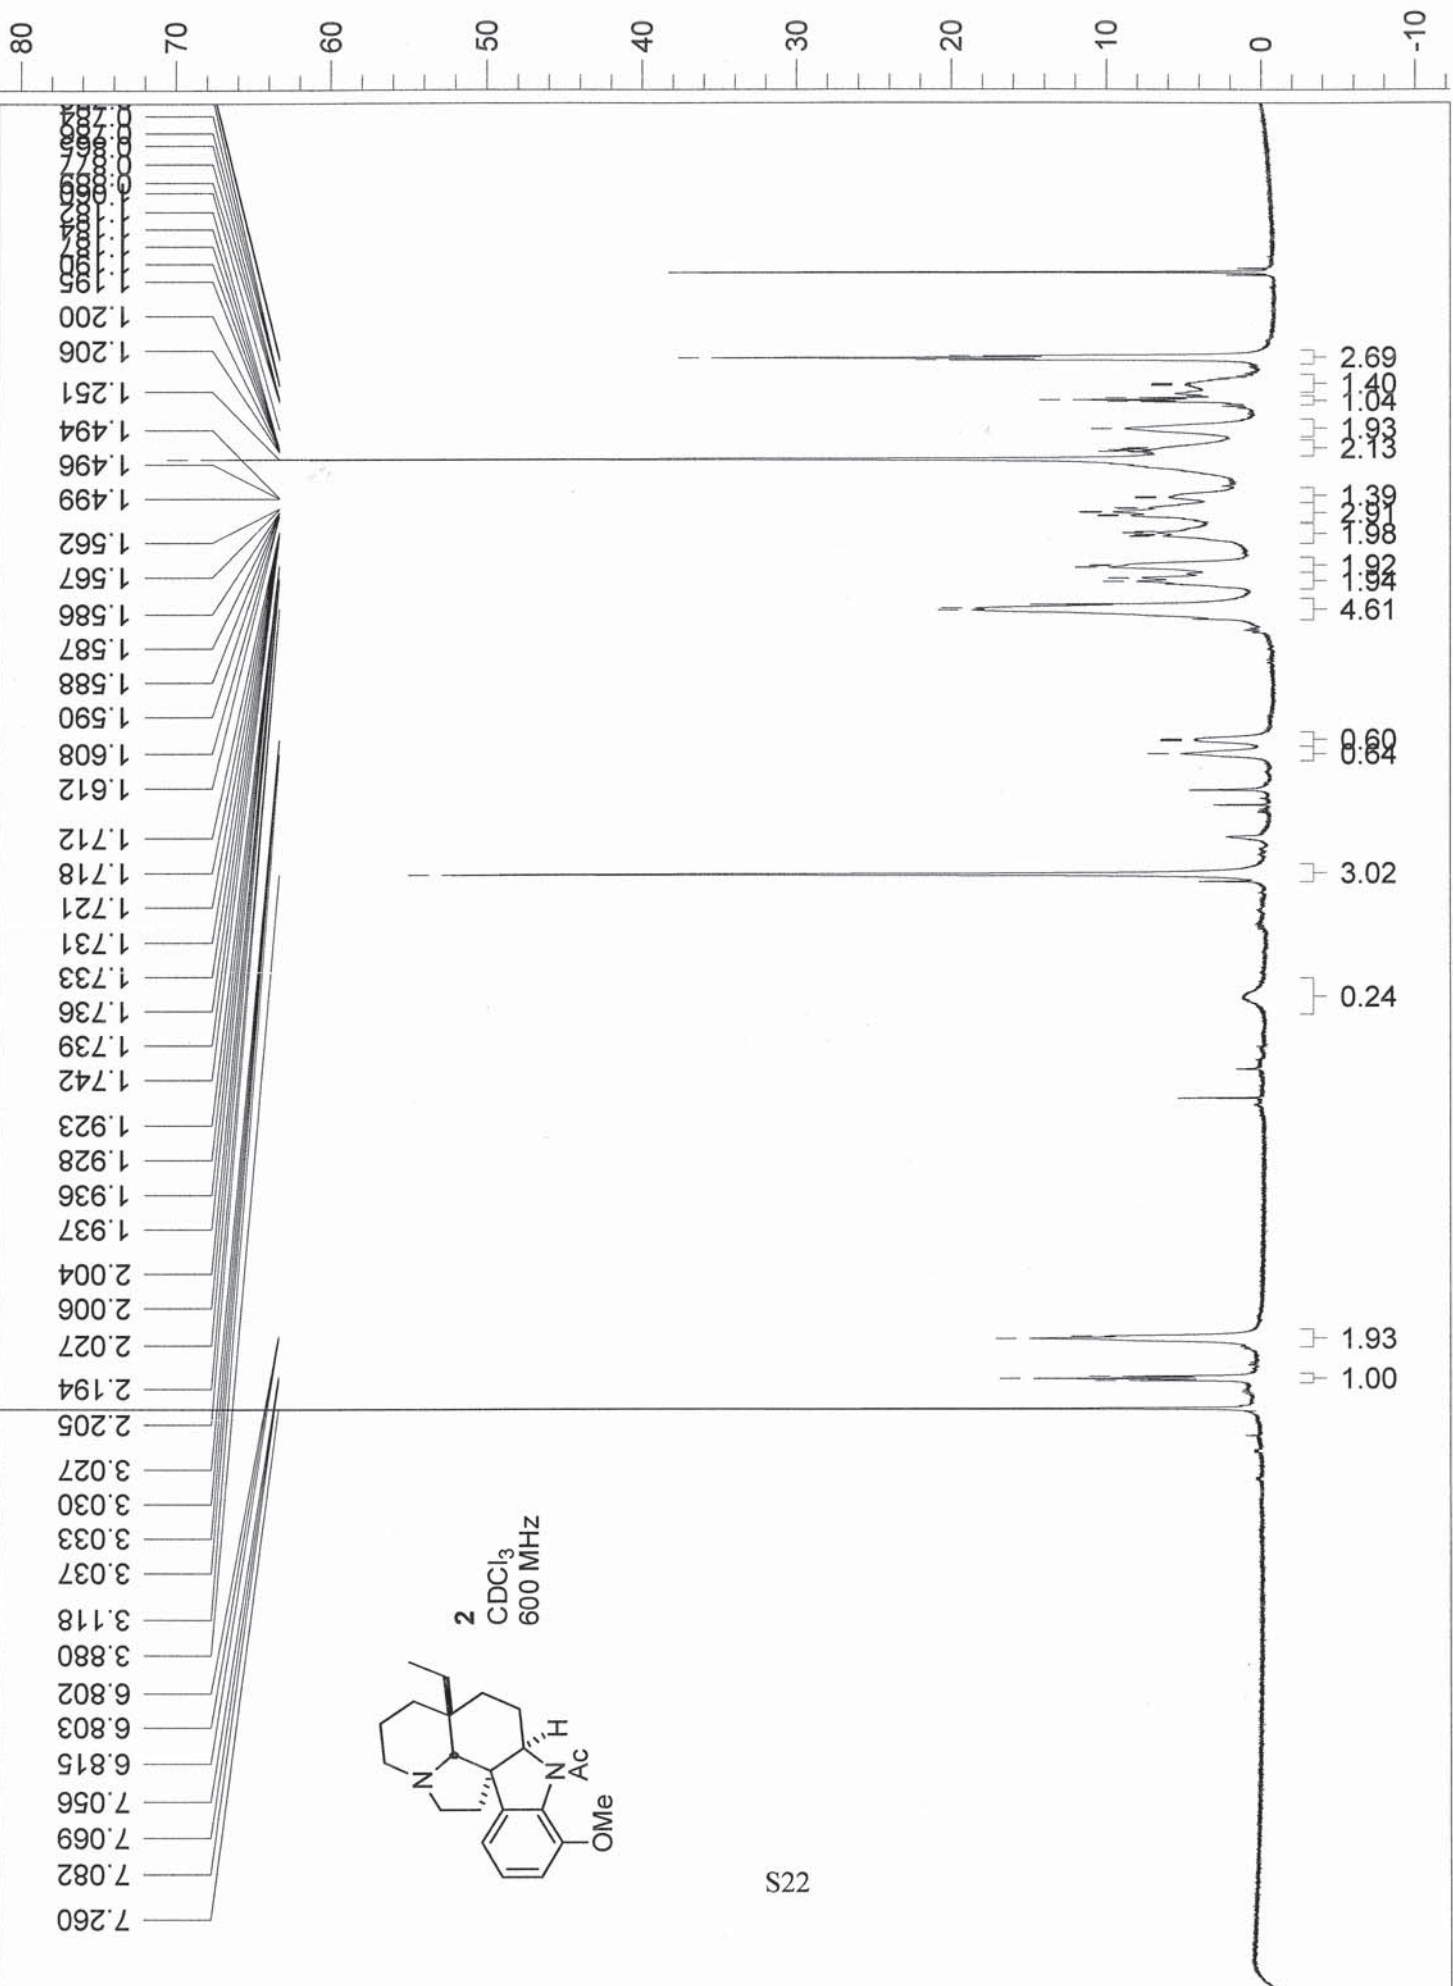

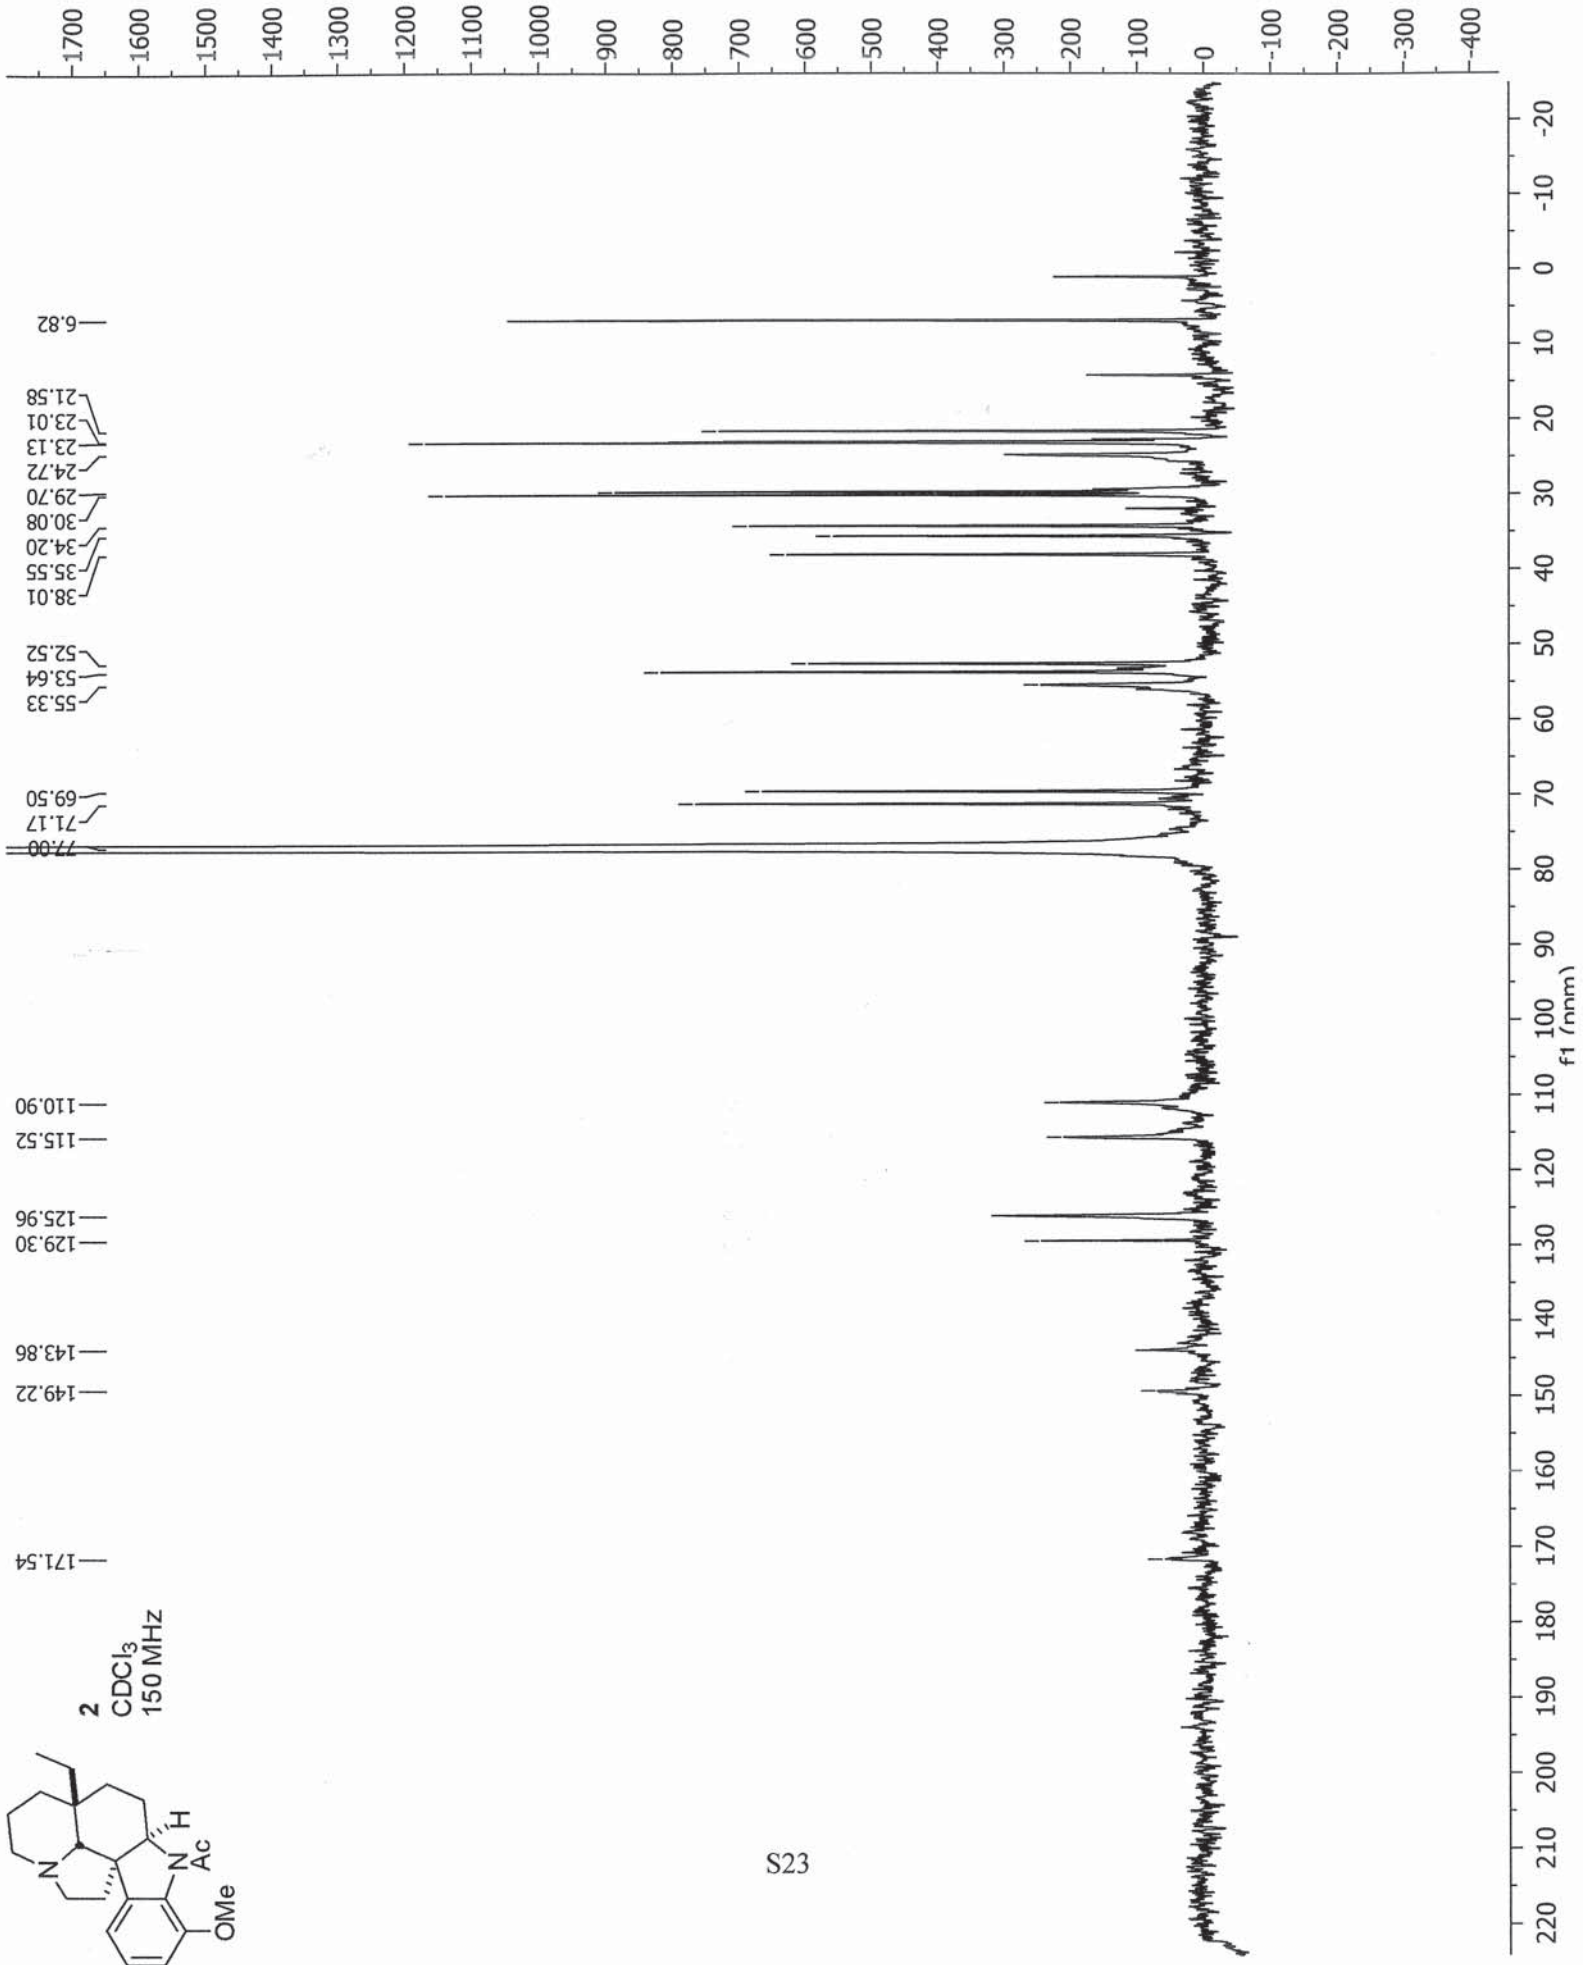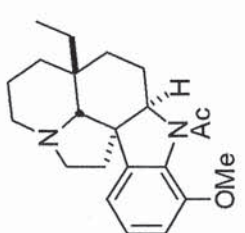

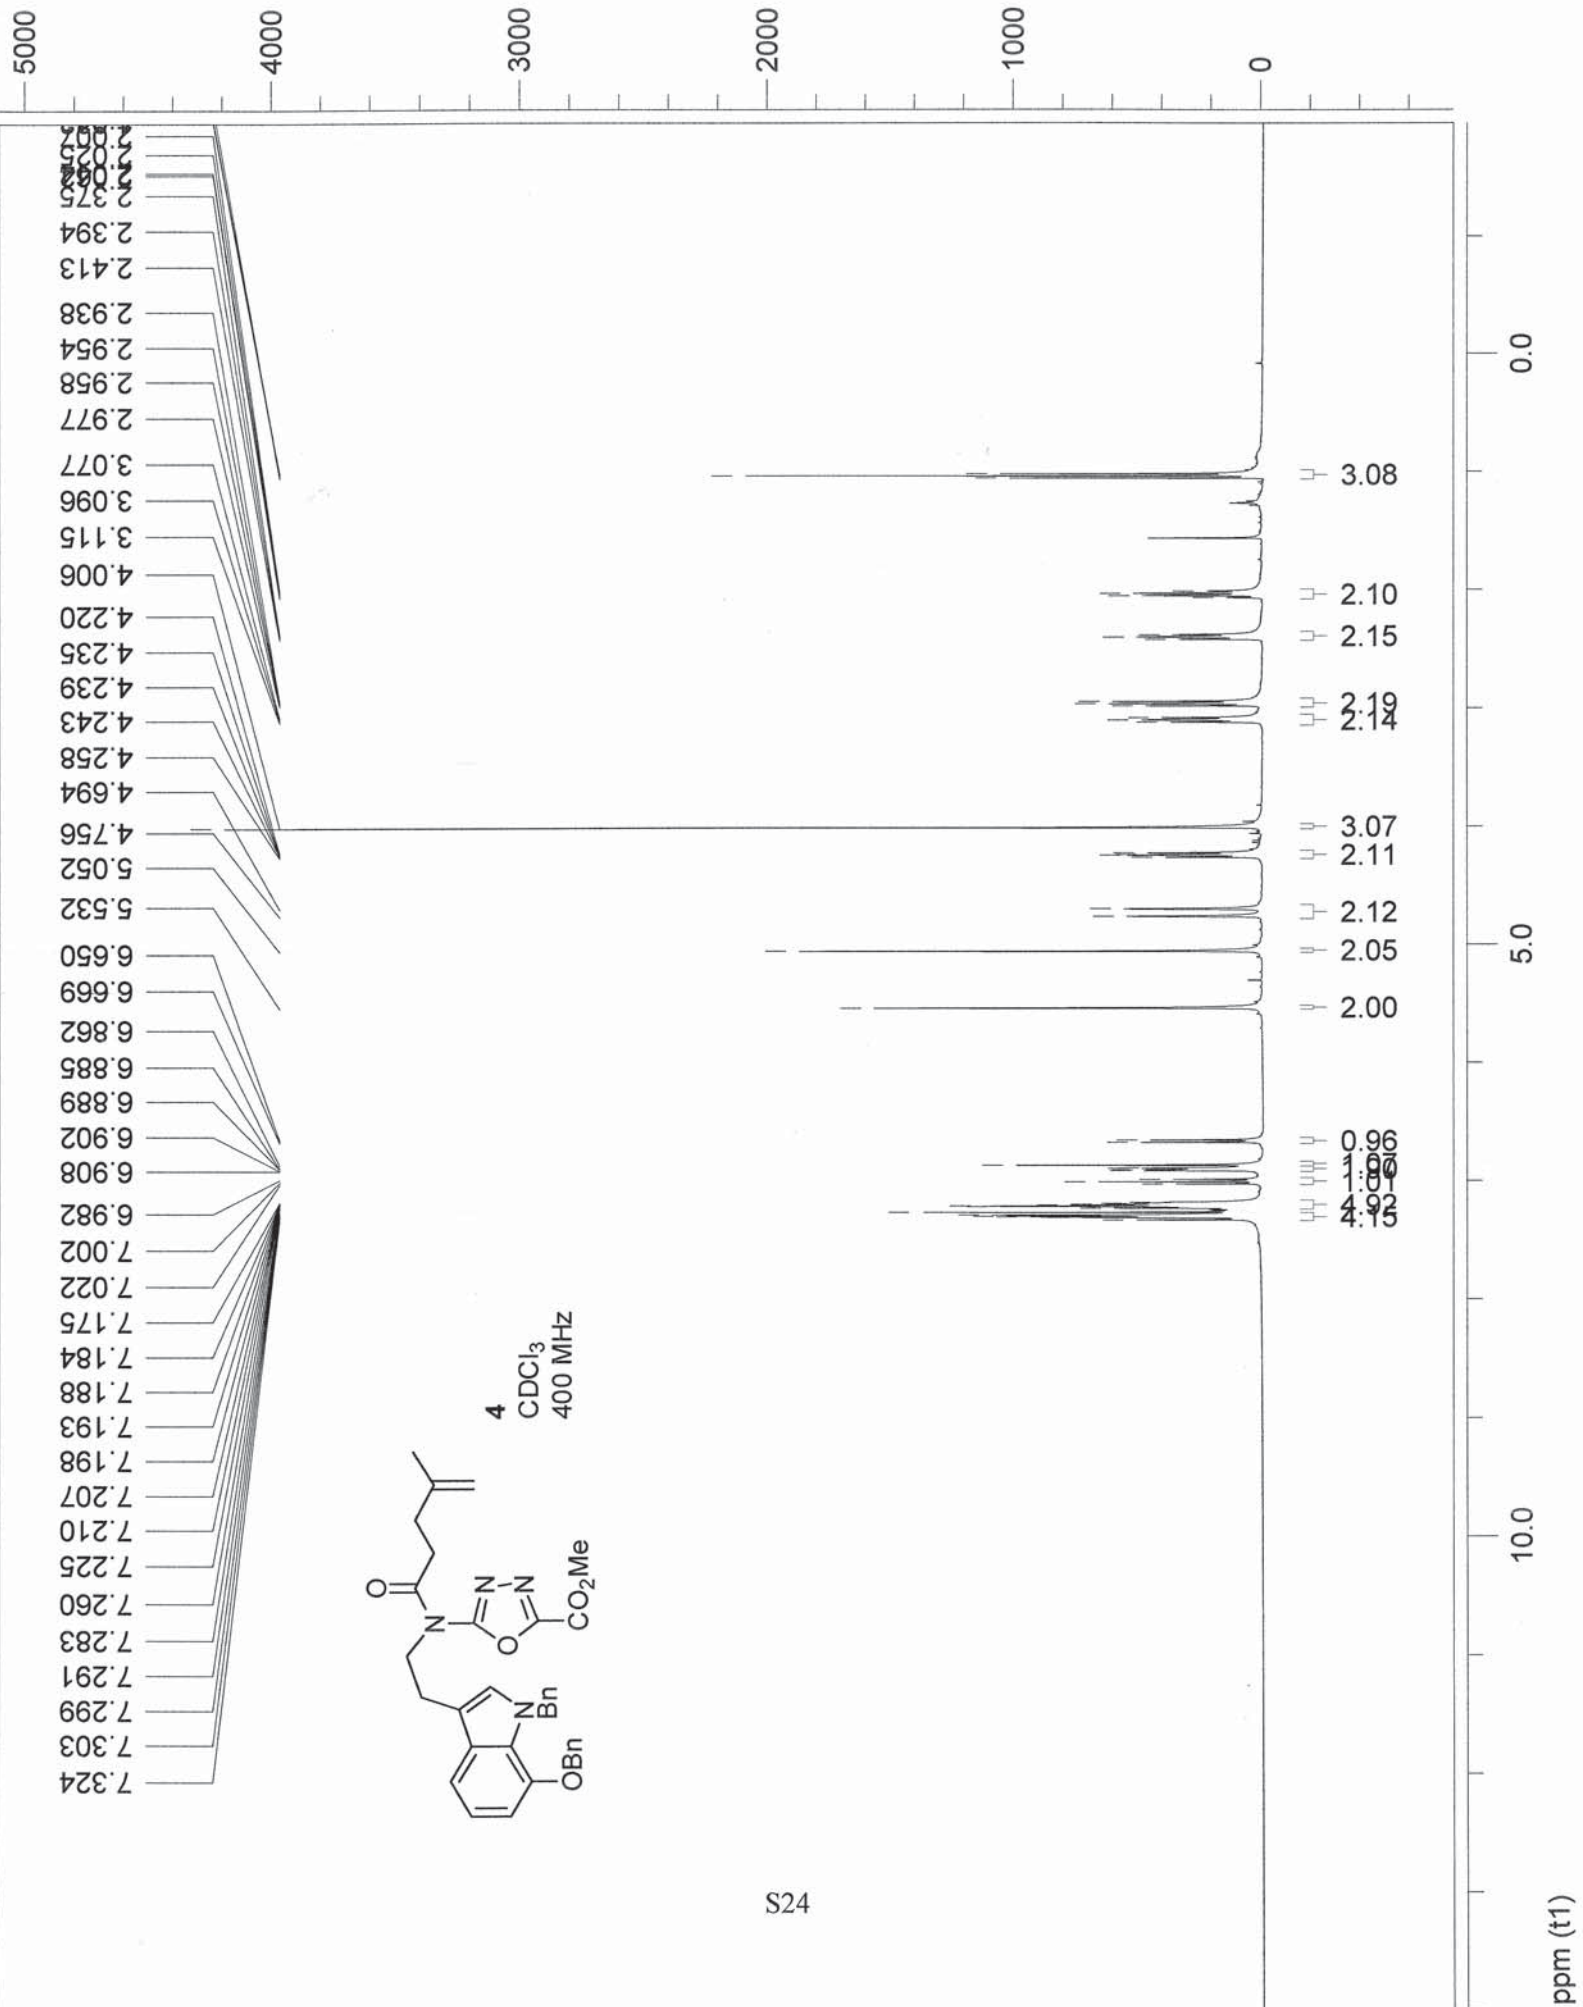



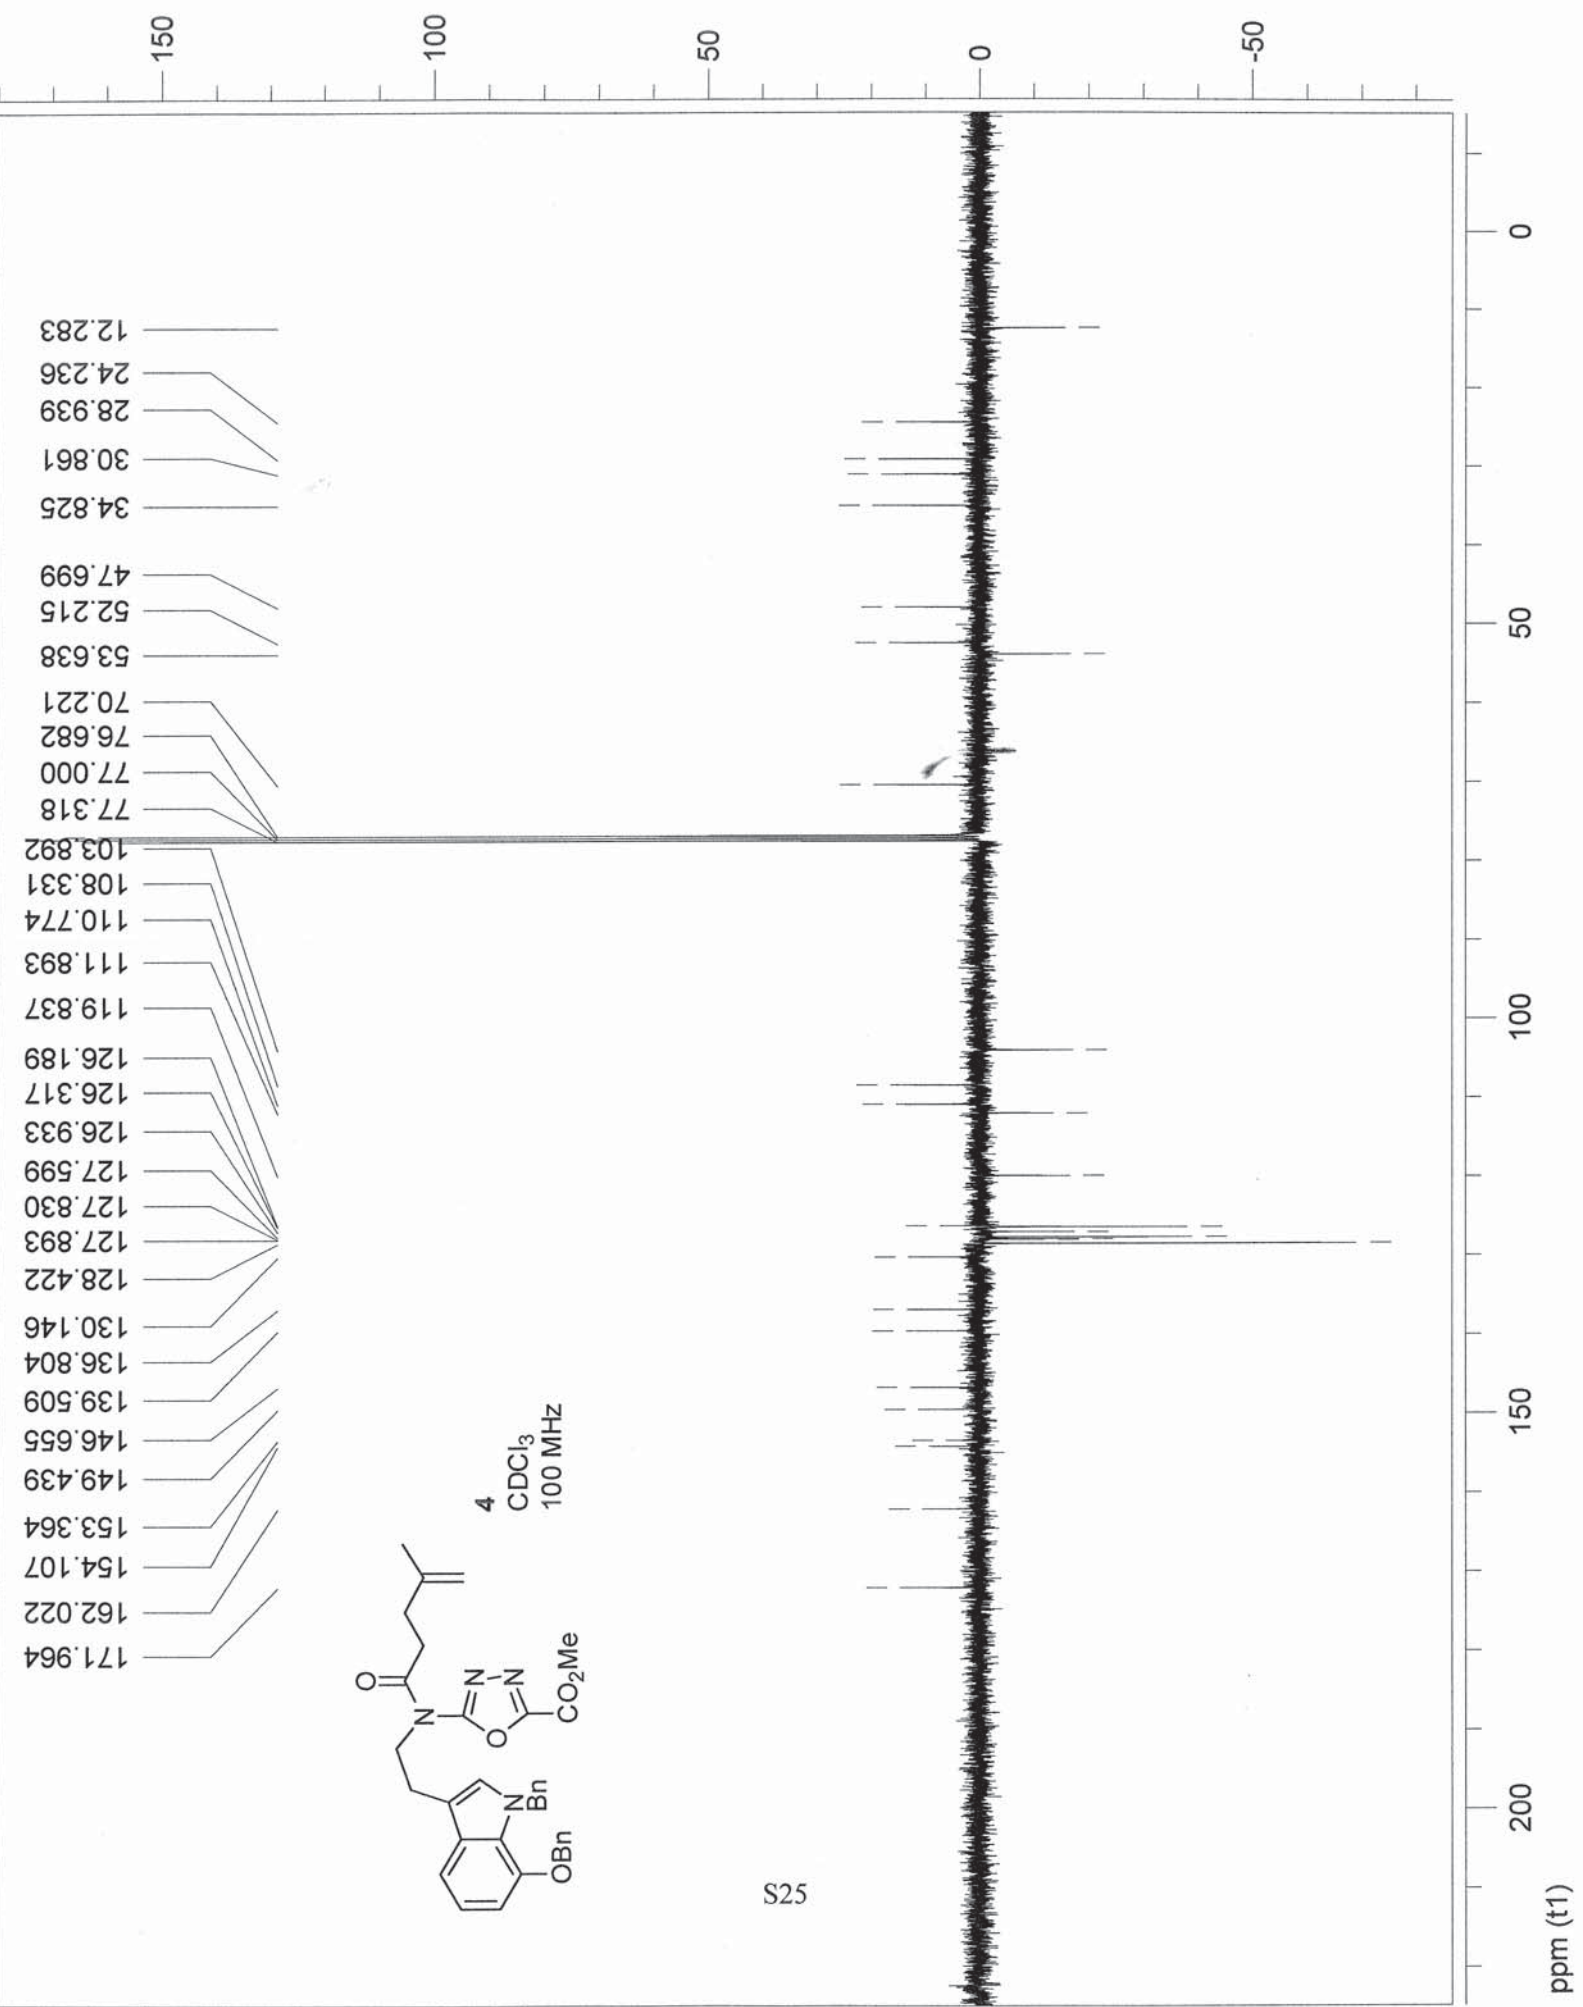





20.0

15.0

10.0

5.0

0.0

9.825  
22.203  
27.751  
29.156  
37.156  
38.533  
43.840  
46.848  
52.539  
53.301  
65.121  
70.630  
79.897  
85.572  
106.842  
114.140  
117.126  
120.302  
126.966  
127.363  
127.918  
128.043  
128.322  
128.498  
131.470  
136.691  
138.608  
140.977  
145.274  
170.404  
171.084

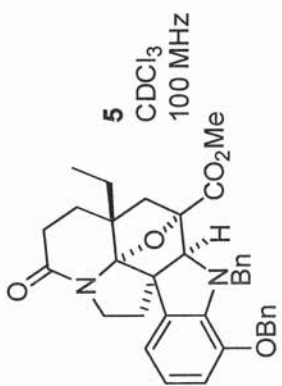

S27

0

50

100

150

200

ppm (t1)

1000

500

0

1.701  
1.704  
3.040  
3.056  
3.073  
3.678  
3.694  
3.709  
3.724  
5.094  
5.566  
5.989  
6.698  
6.717  
6.902  
6.910  
6.920  
6.929  
6.934  
6.978  
6.985  
7.005  
7.025  
7.081  
7.178  
7.199  
7.206  
7.214  
7.221  
7.231  
7.260  
7.294  
7.302  
7.310  
7.908

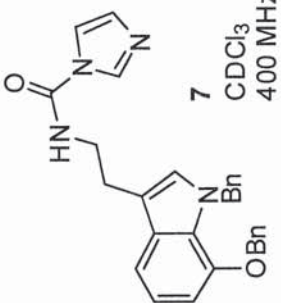

2.08  
2.06  
2.07  
2.07  
1.60  
1.00  
1.00  
1.00  
1.00  
1.60

0.0

5.0

10.0

ppm (t1)

S28

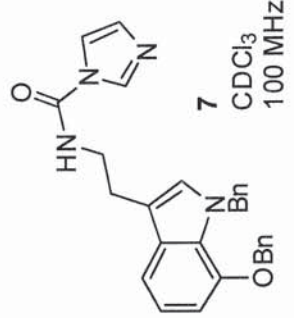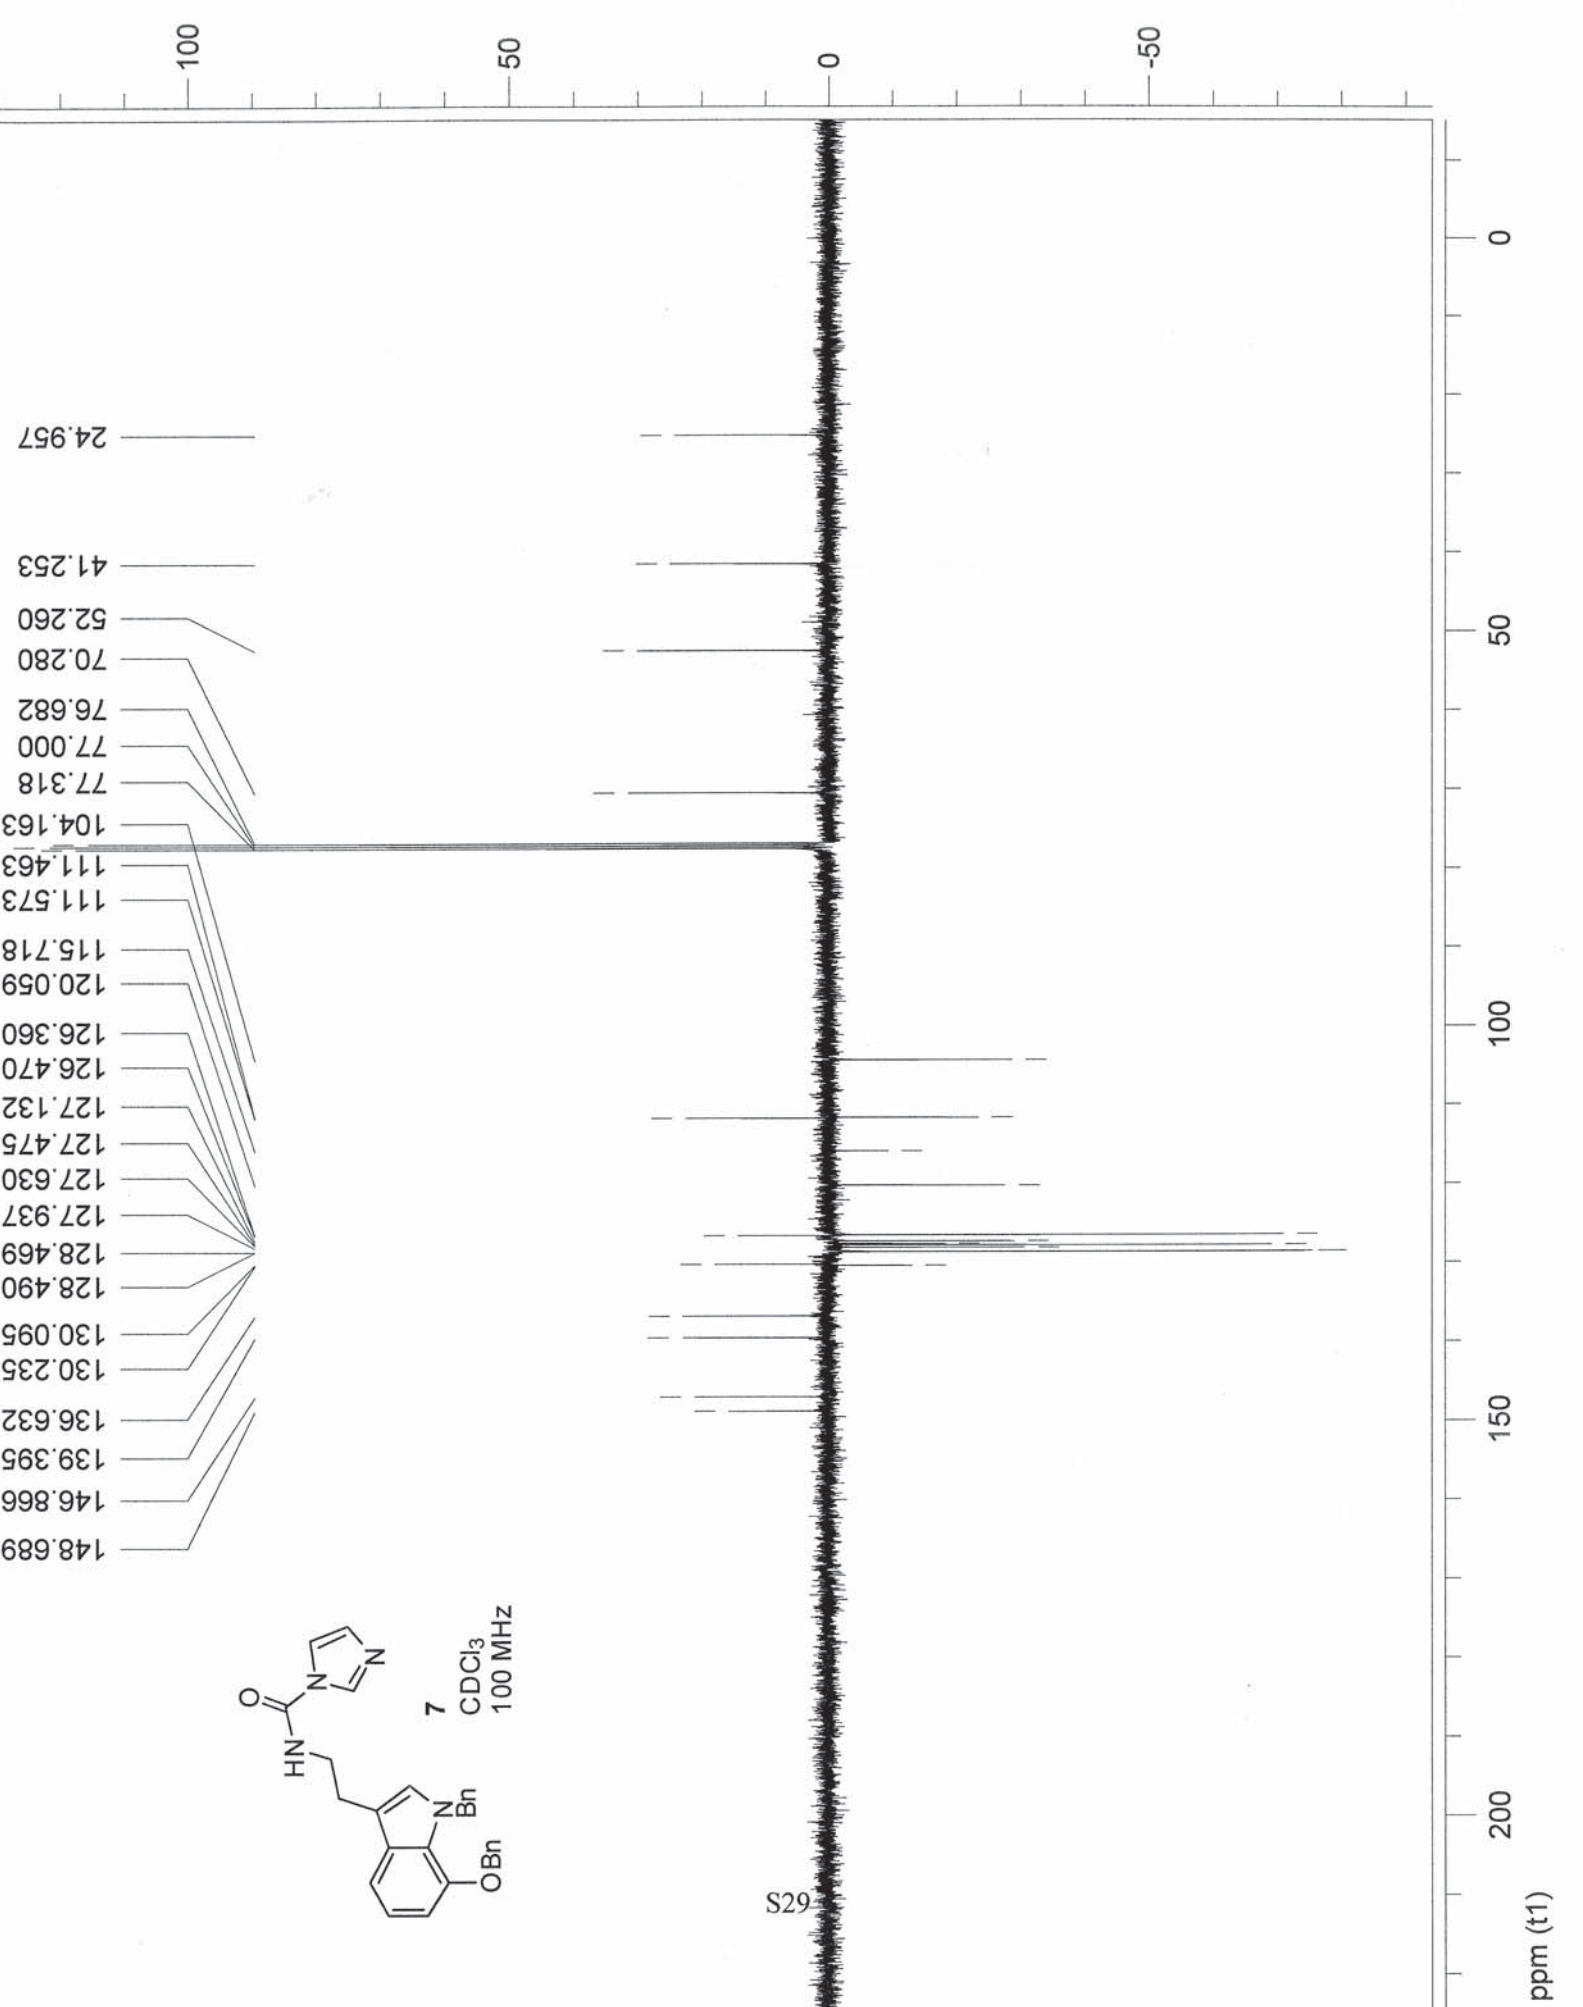

S30

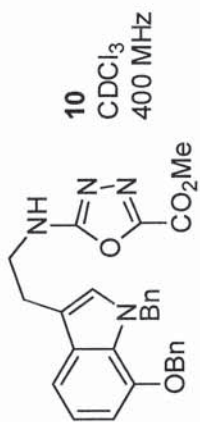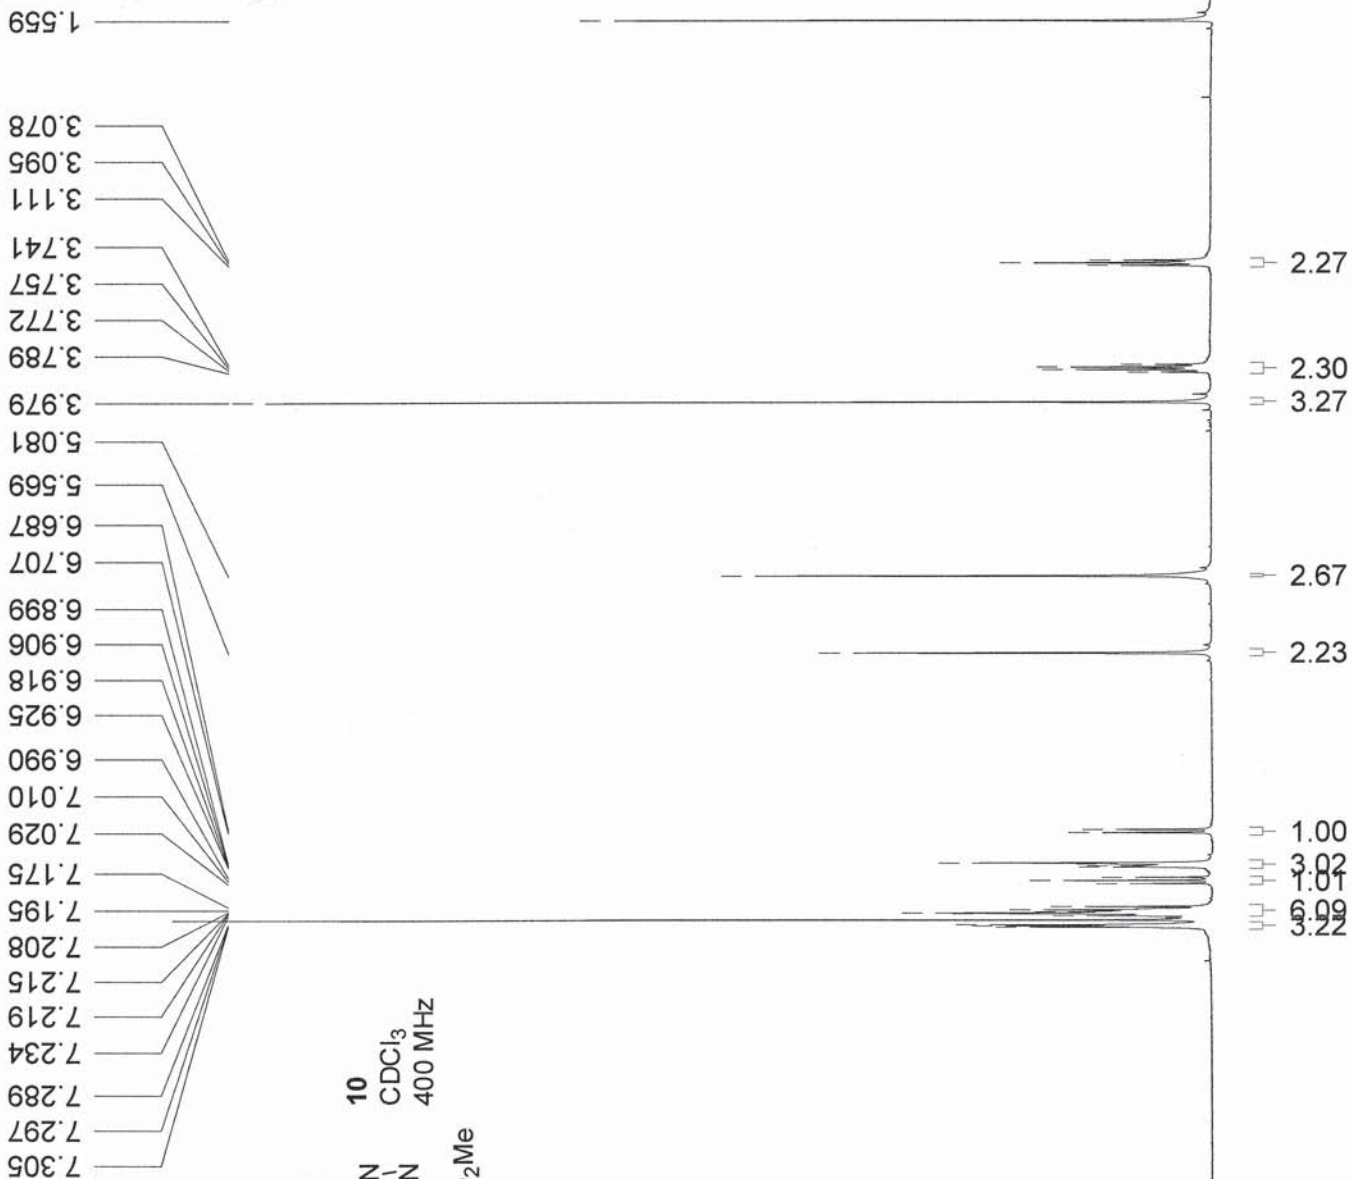

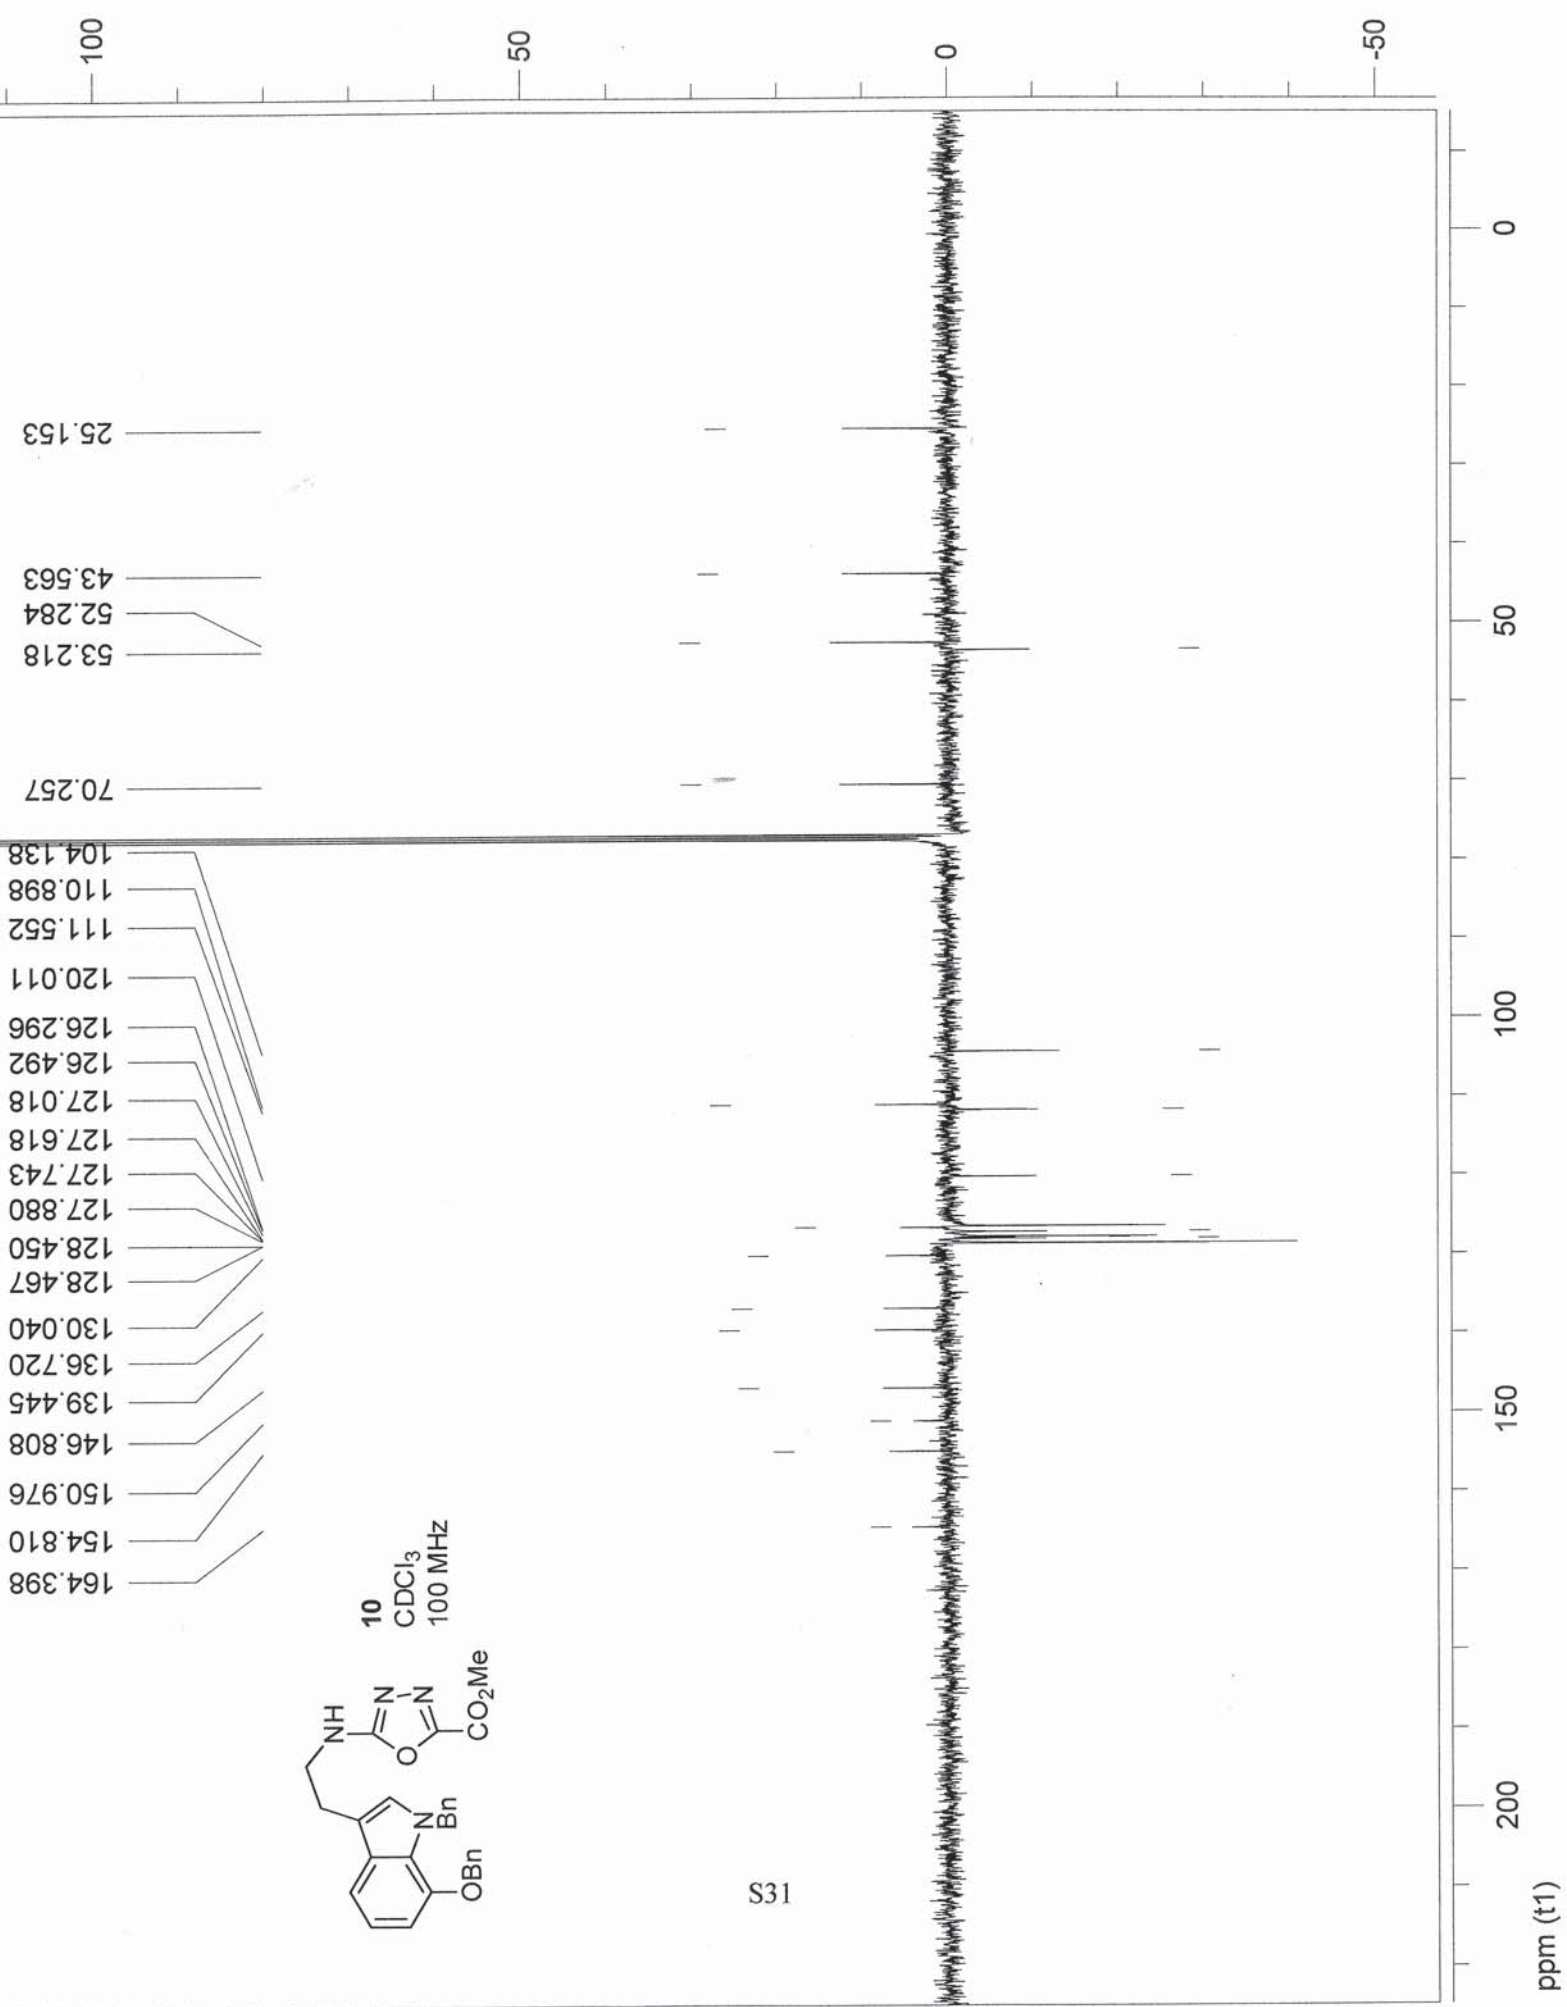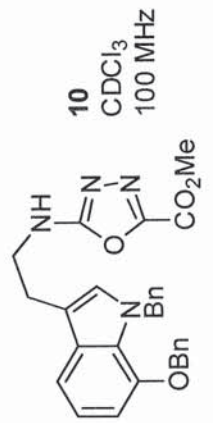







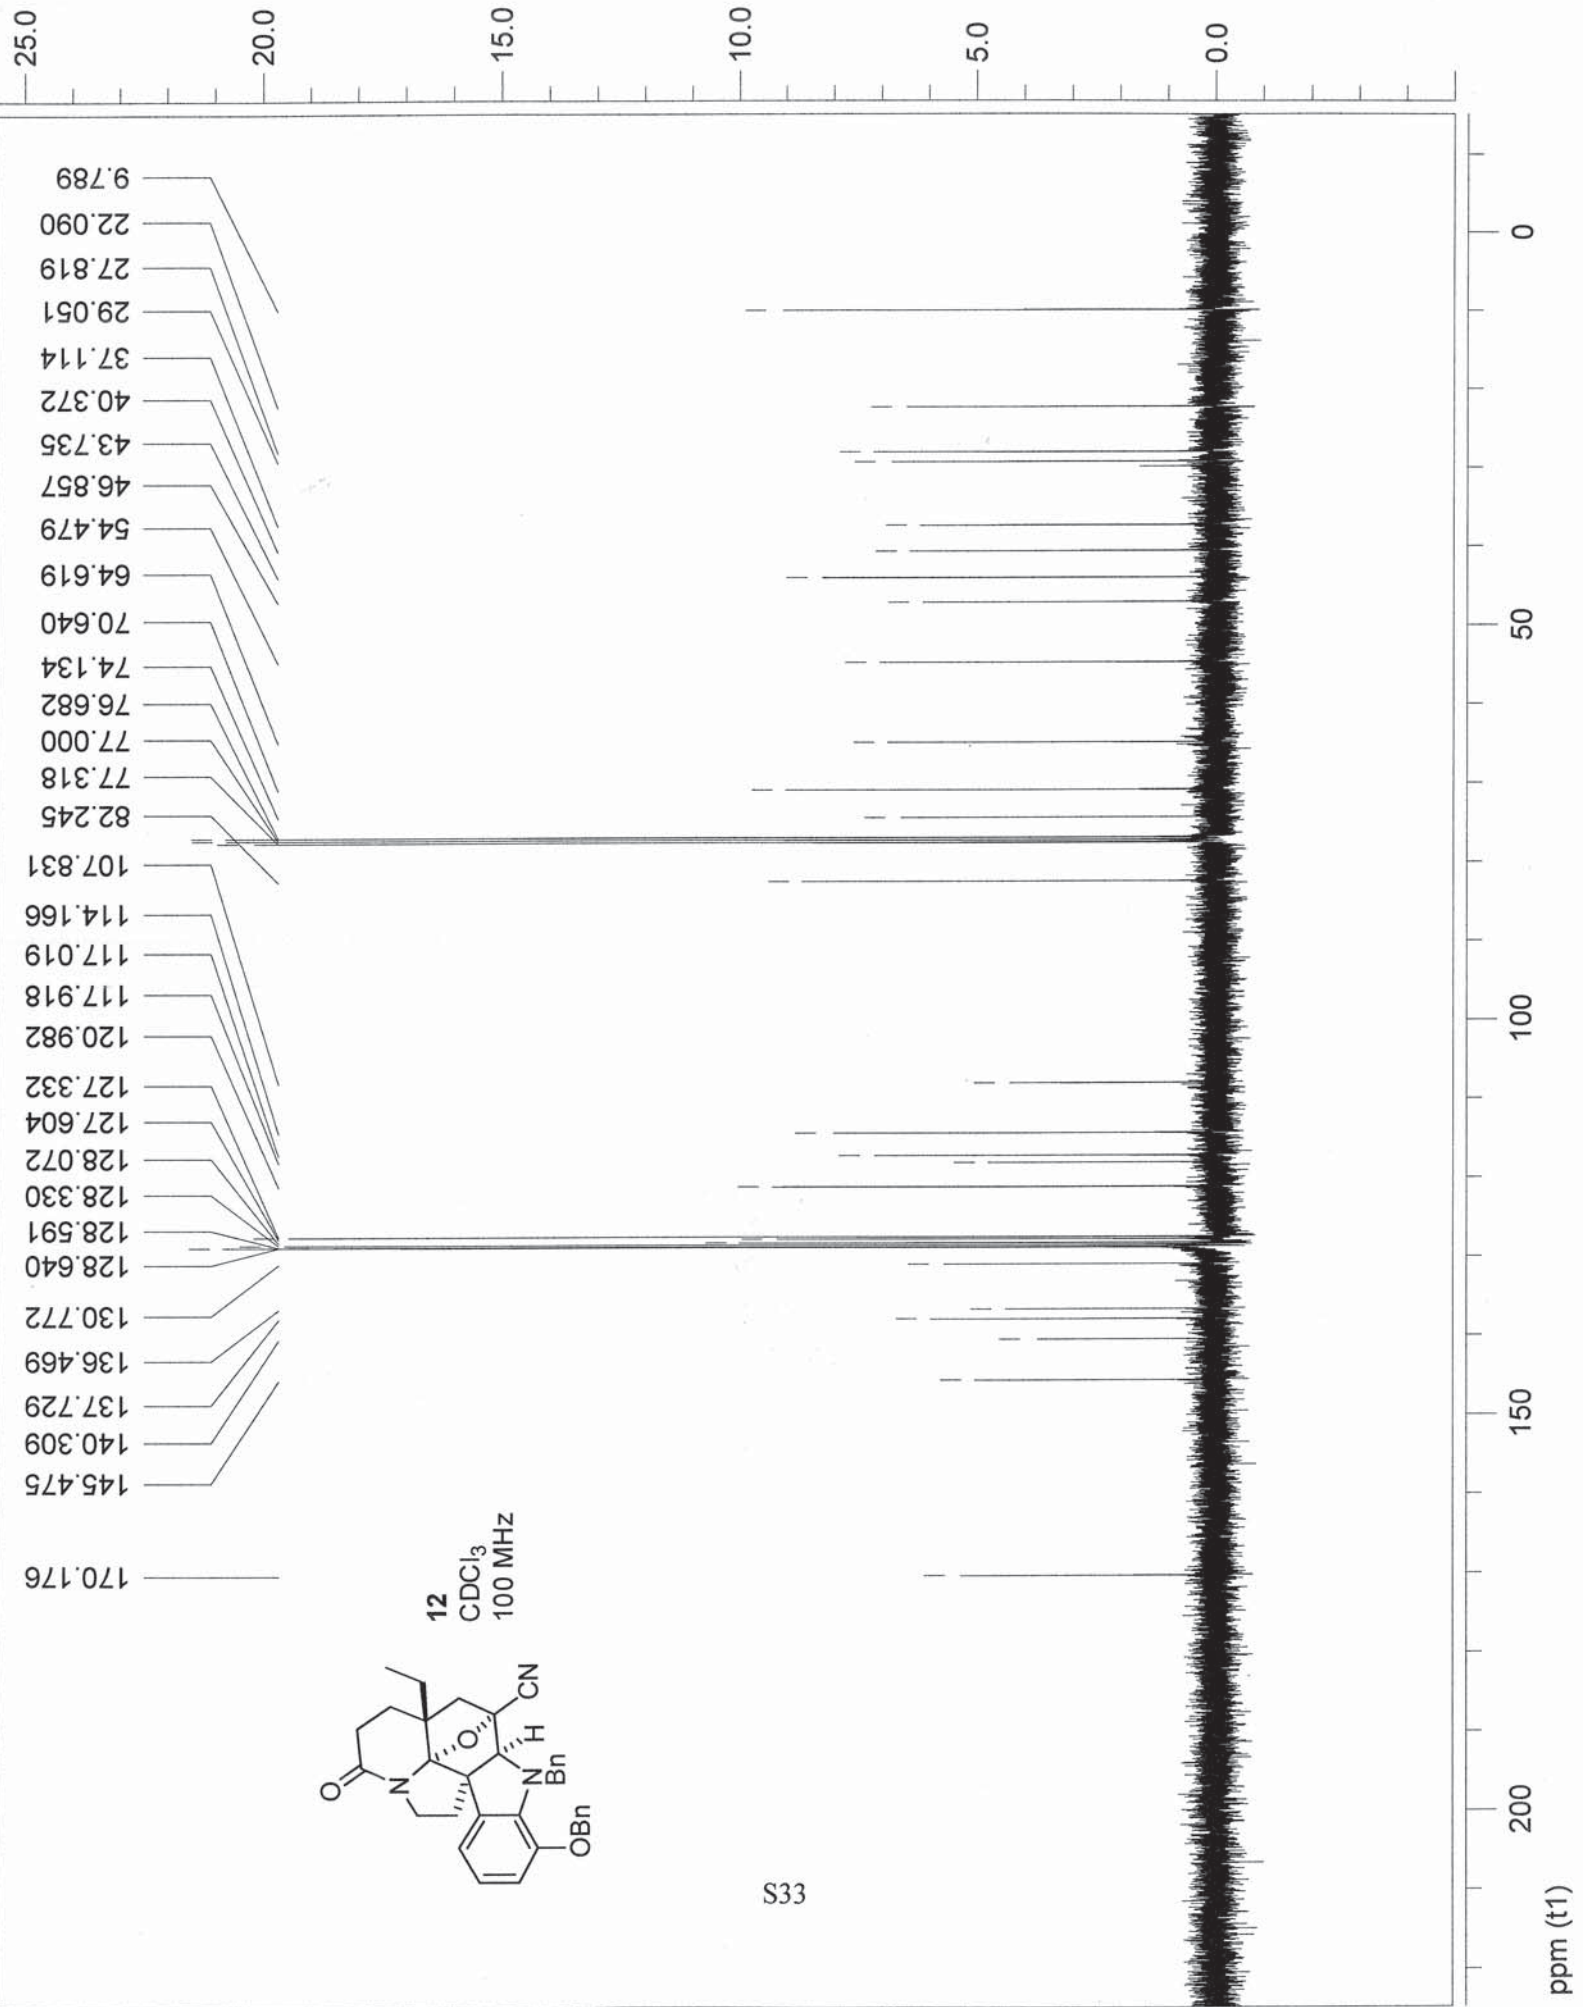

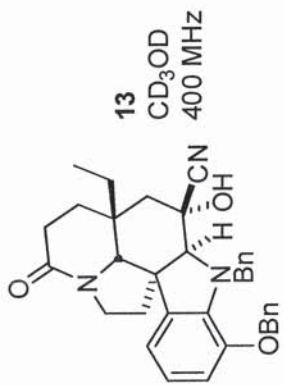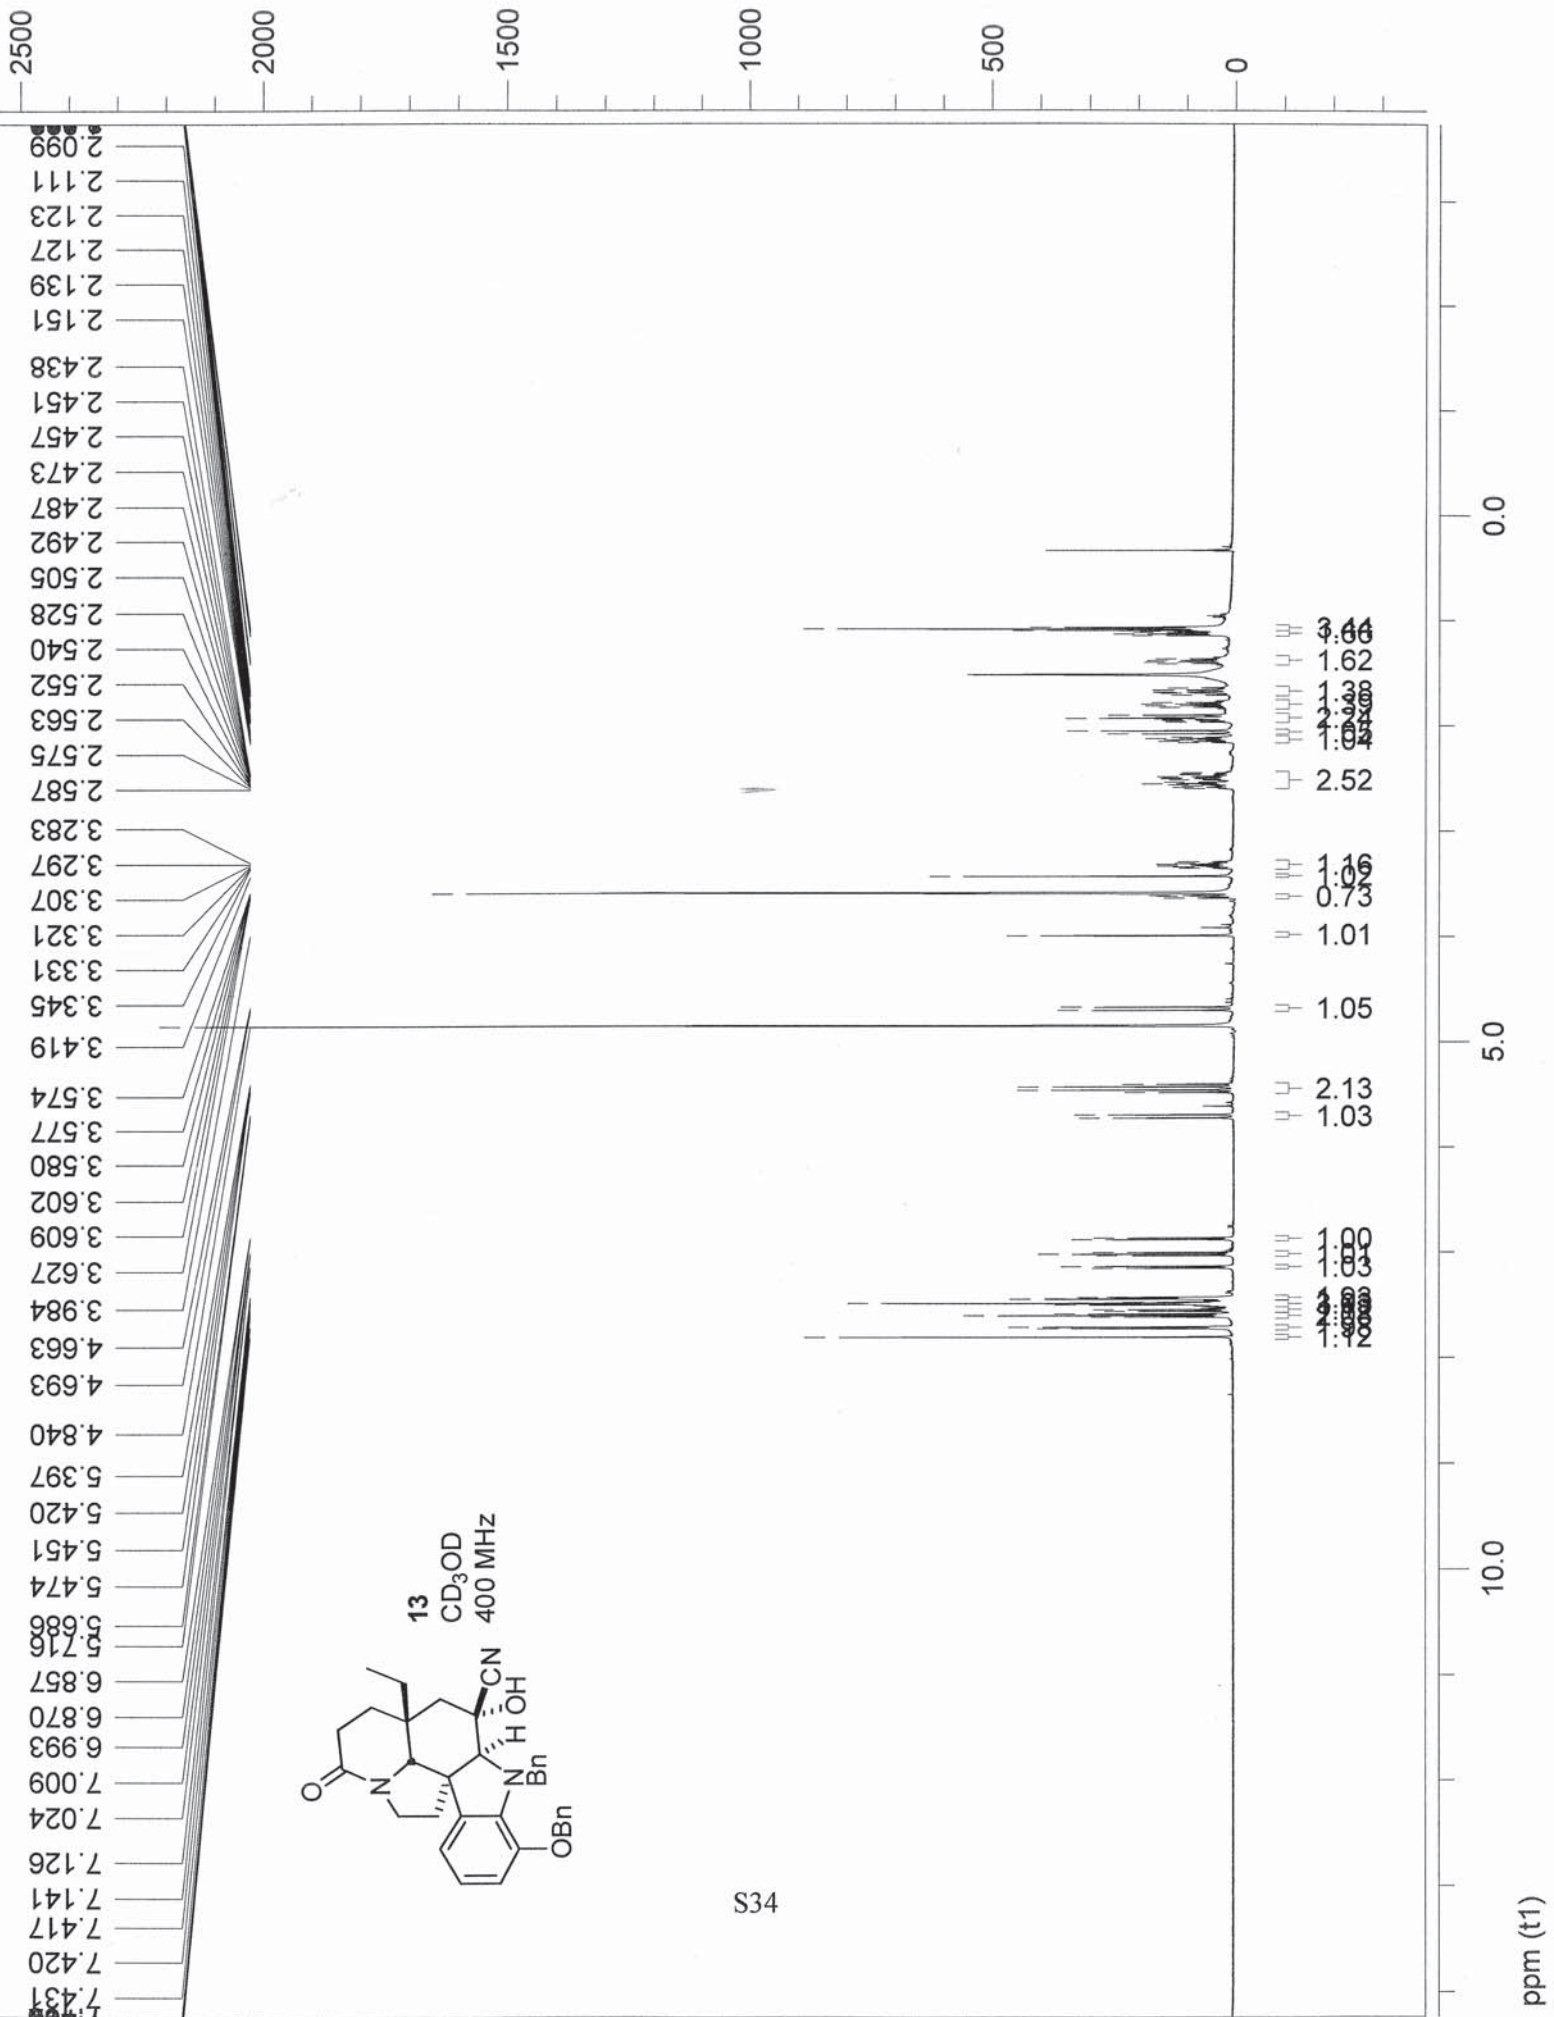

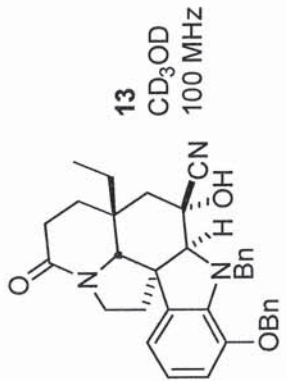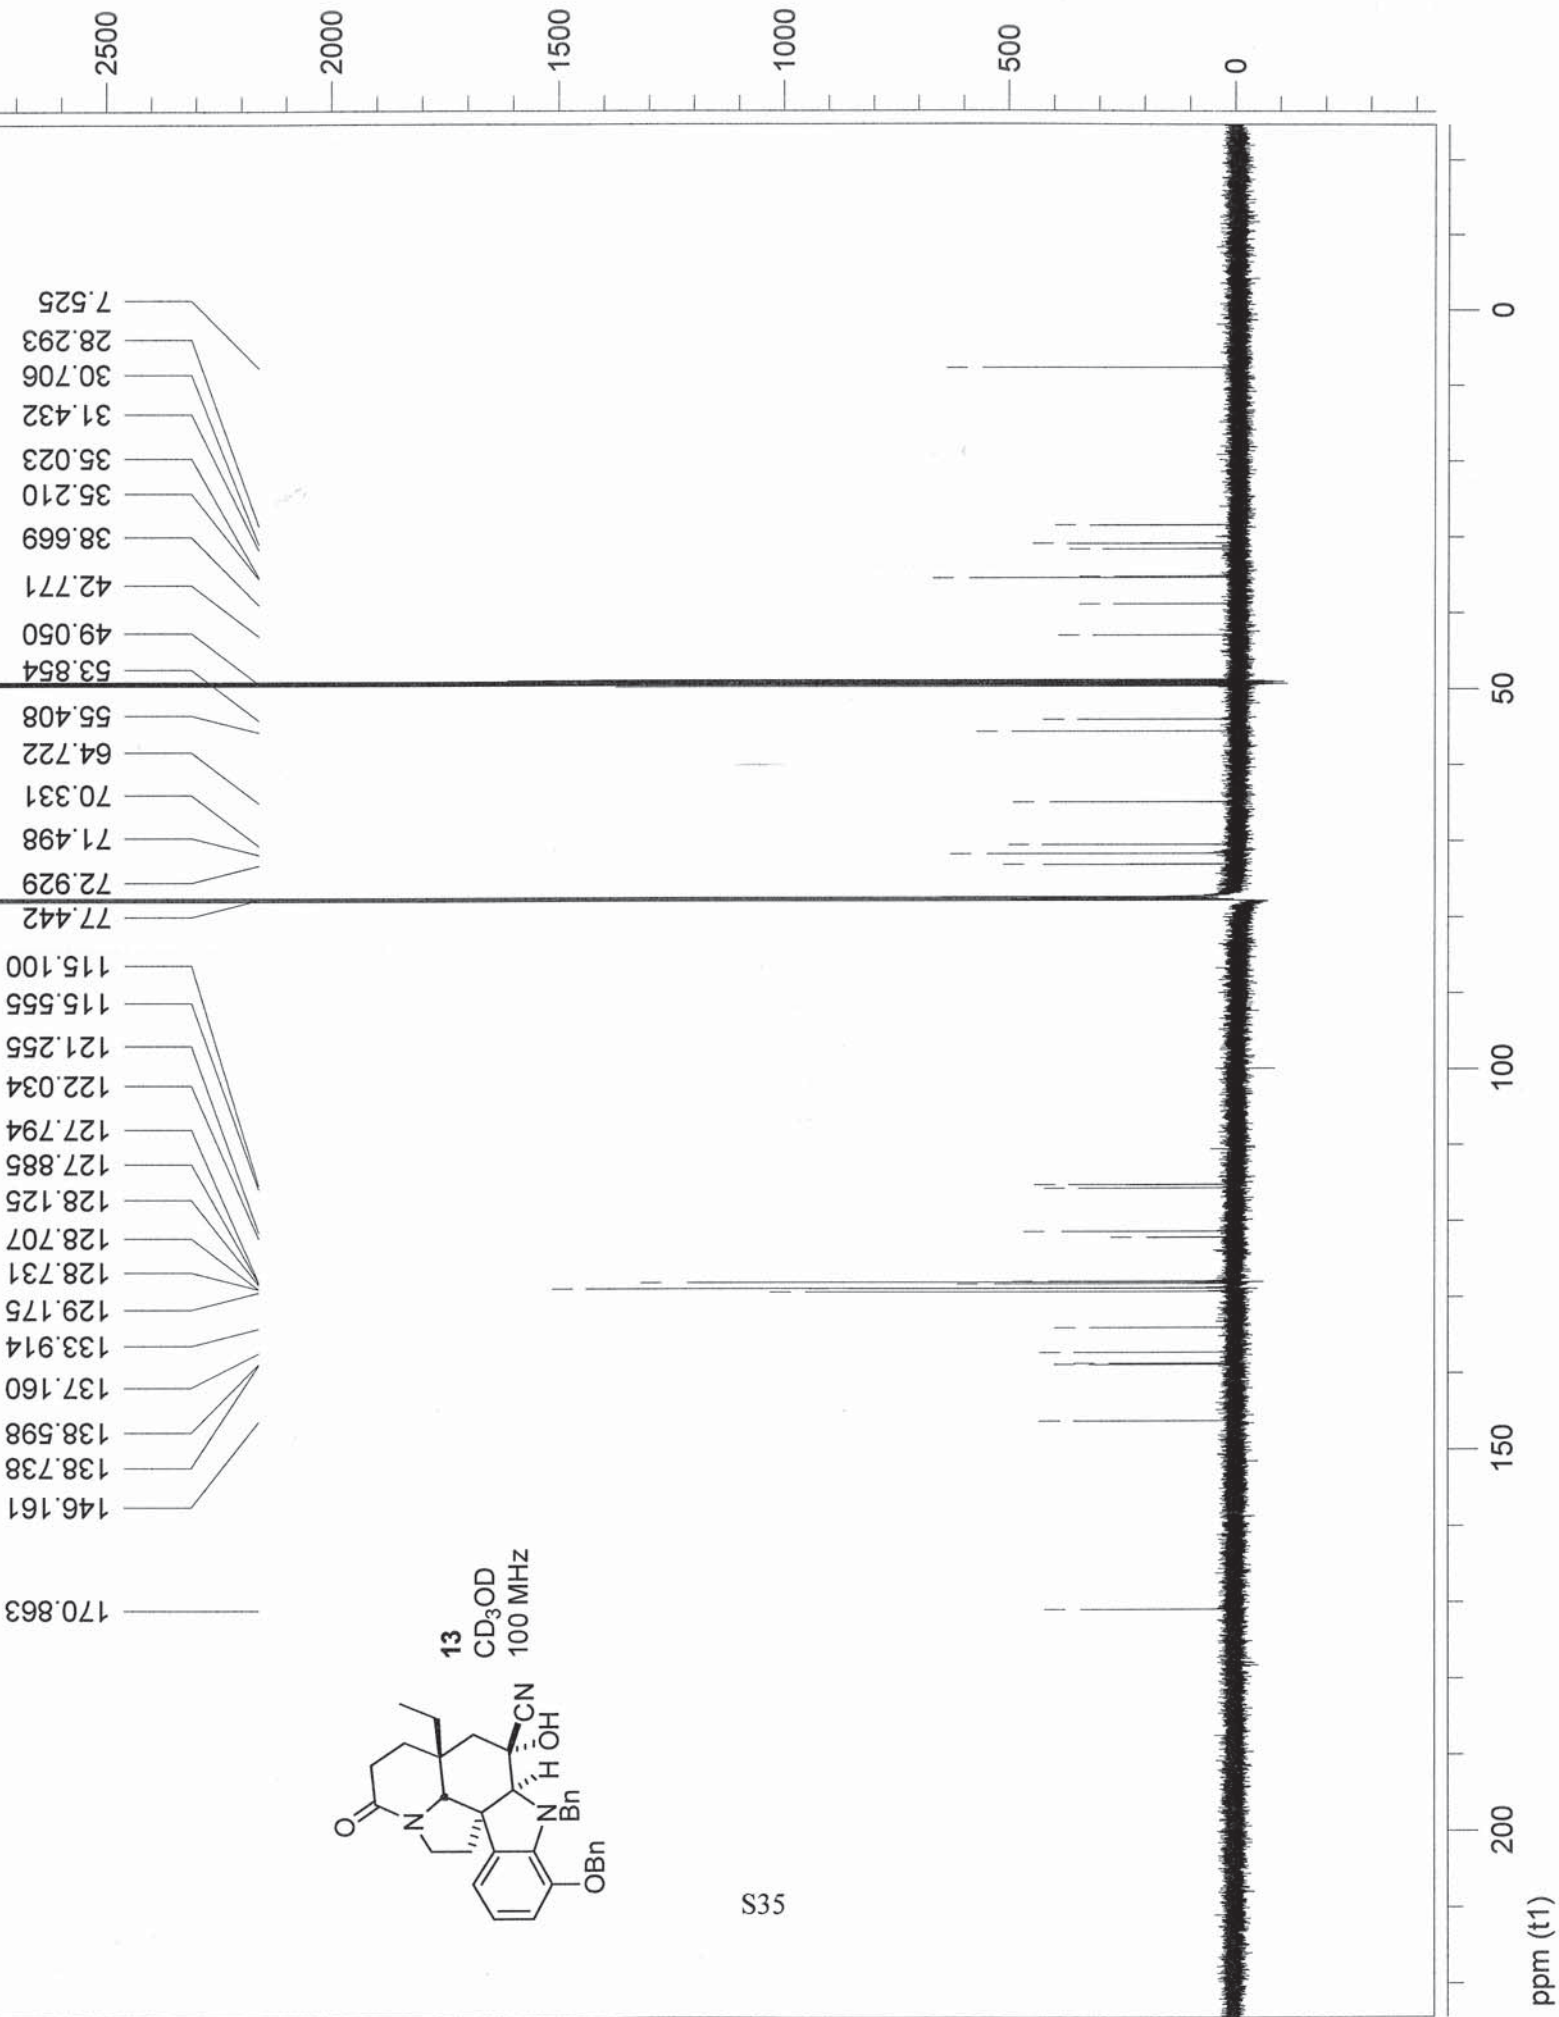

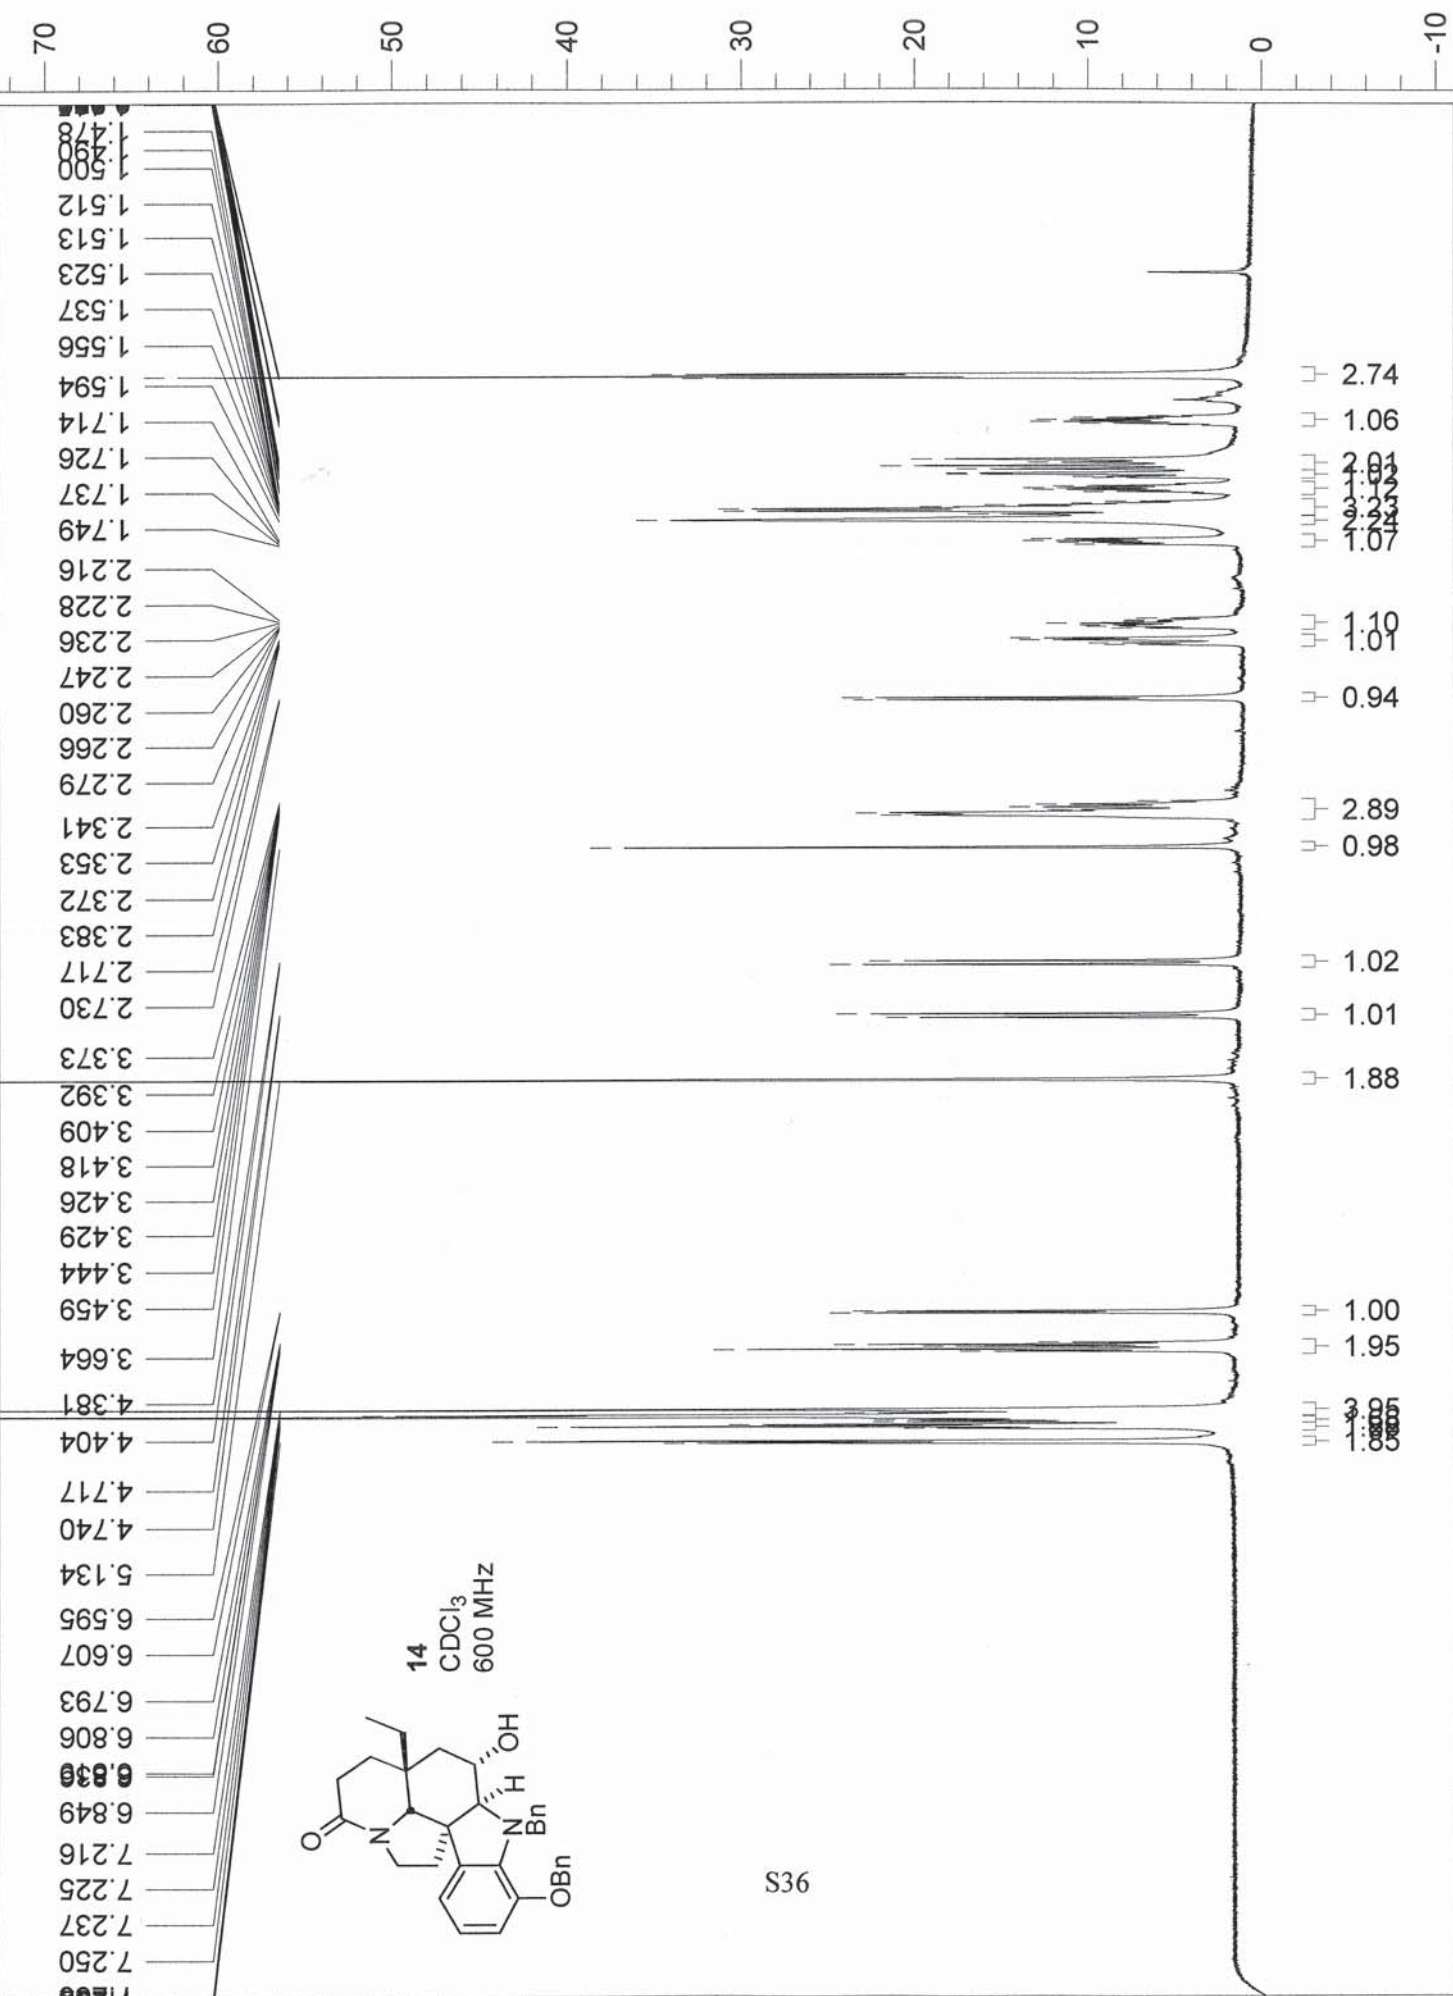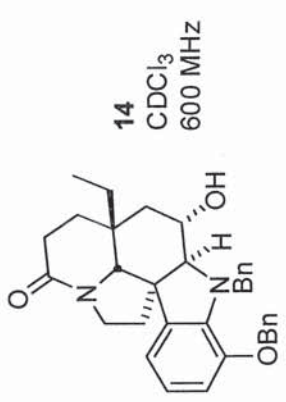

935

ppm (τ)



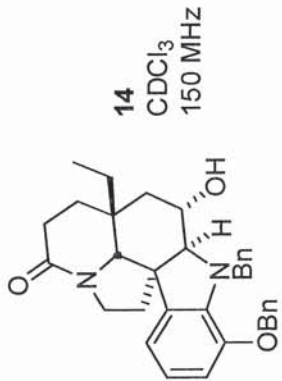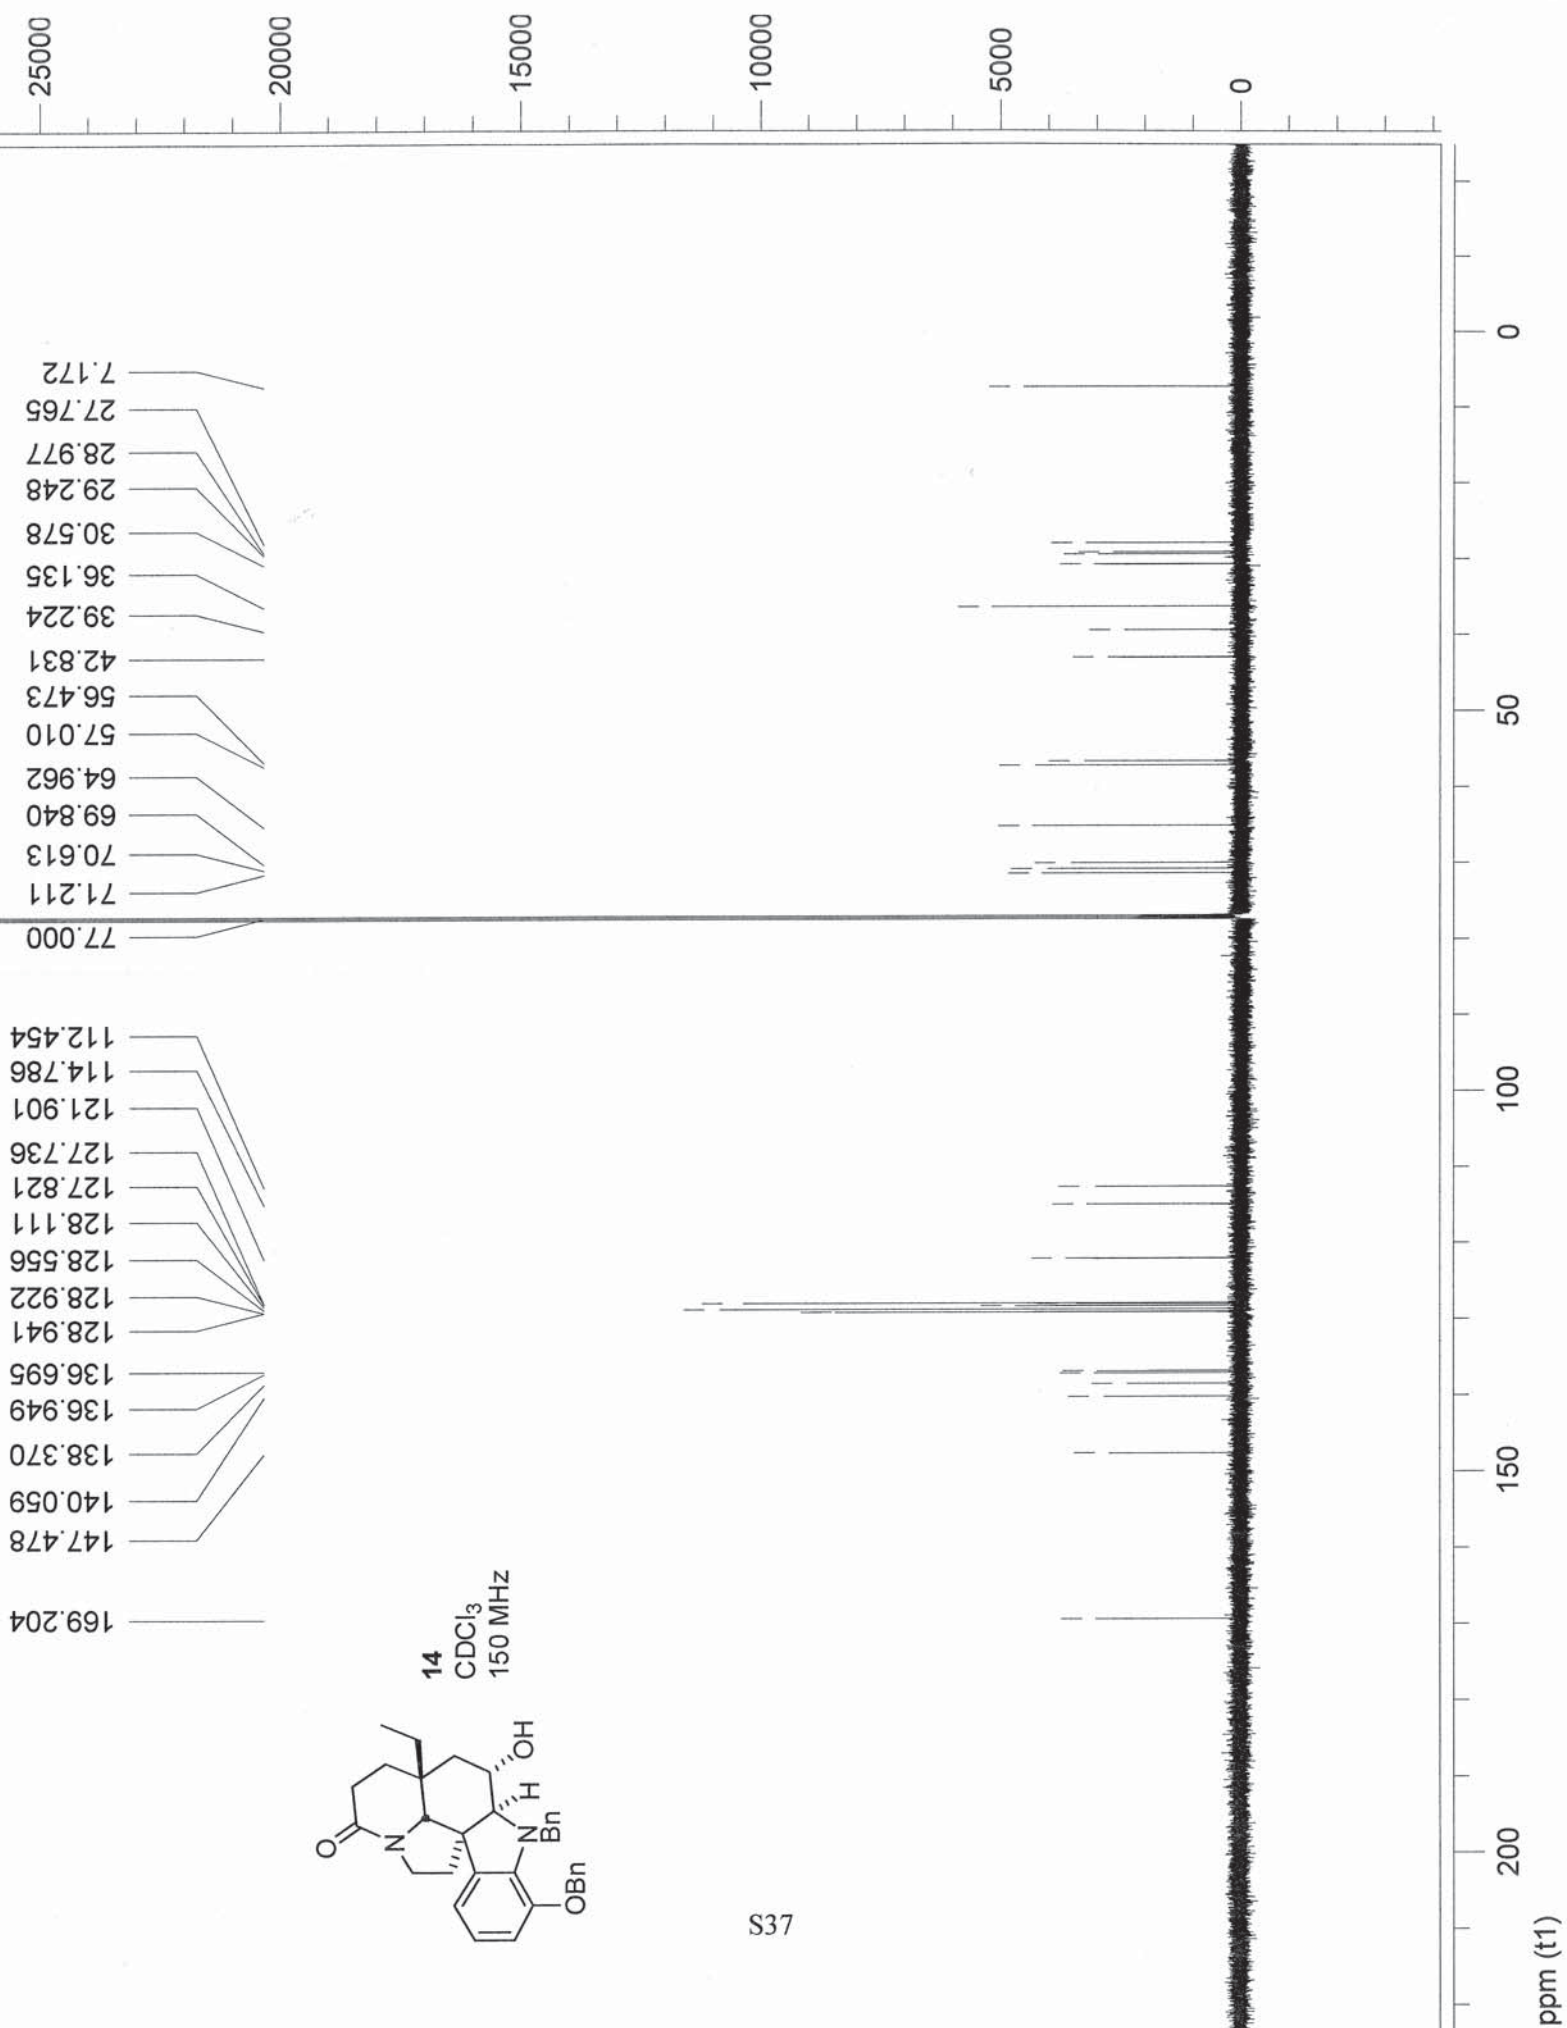

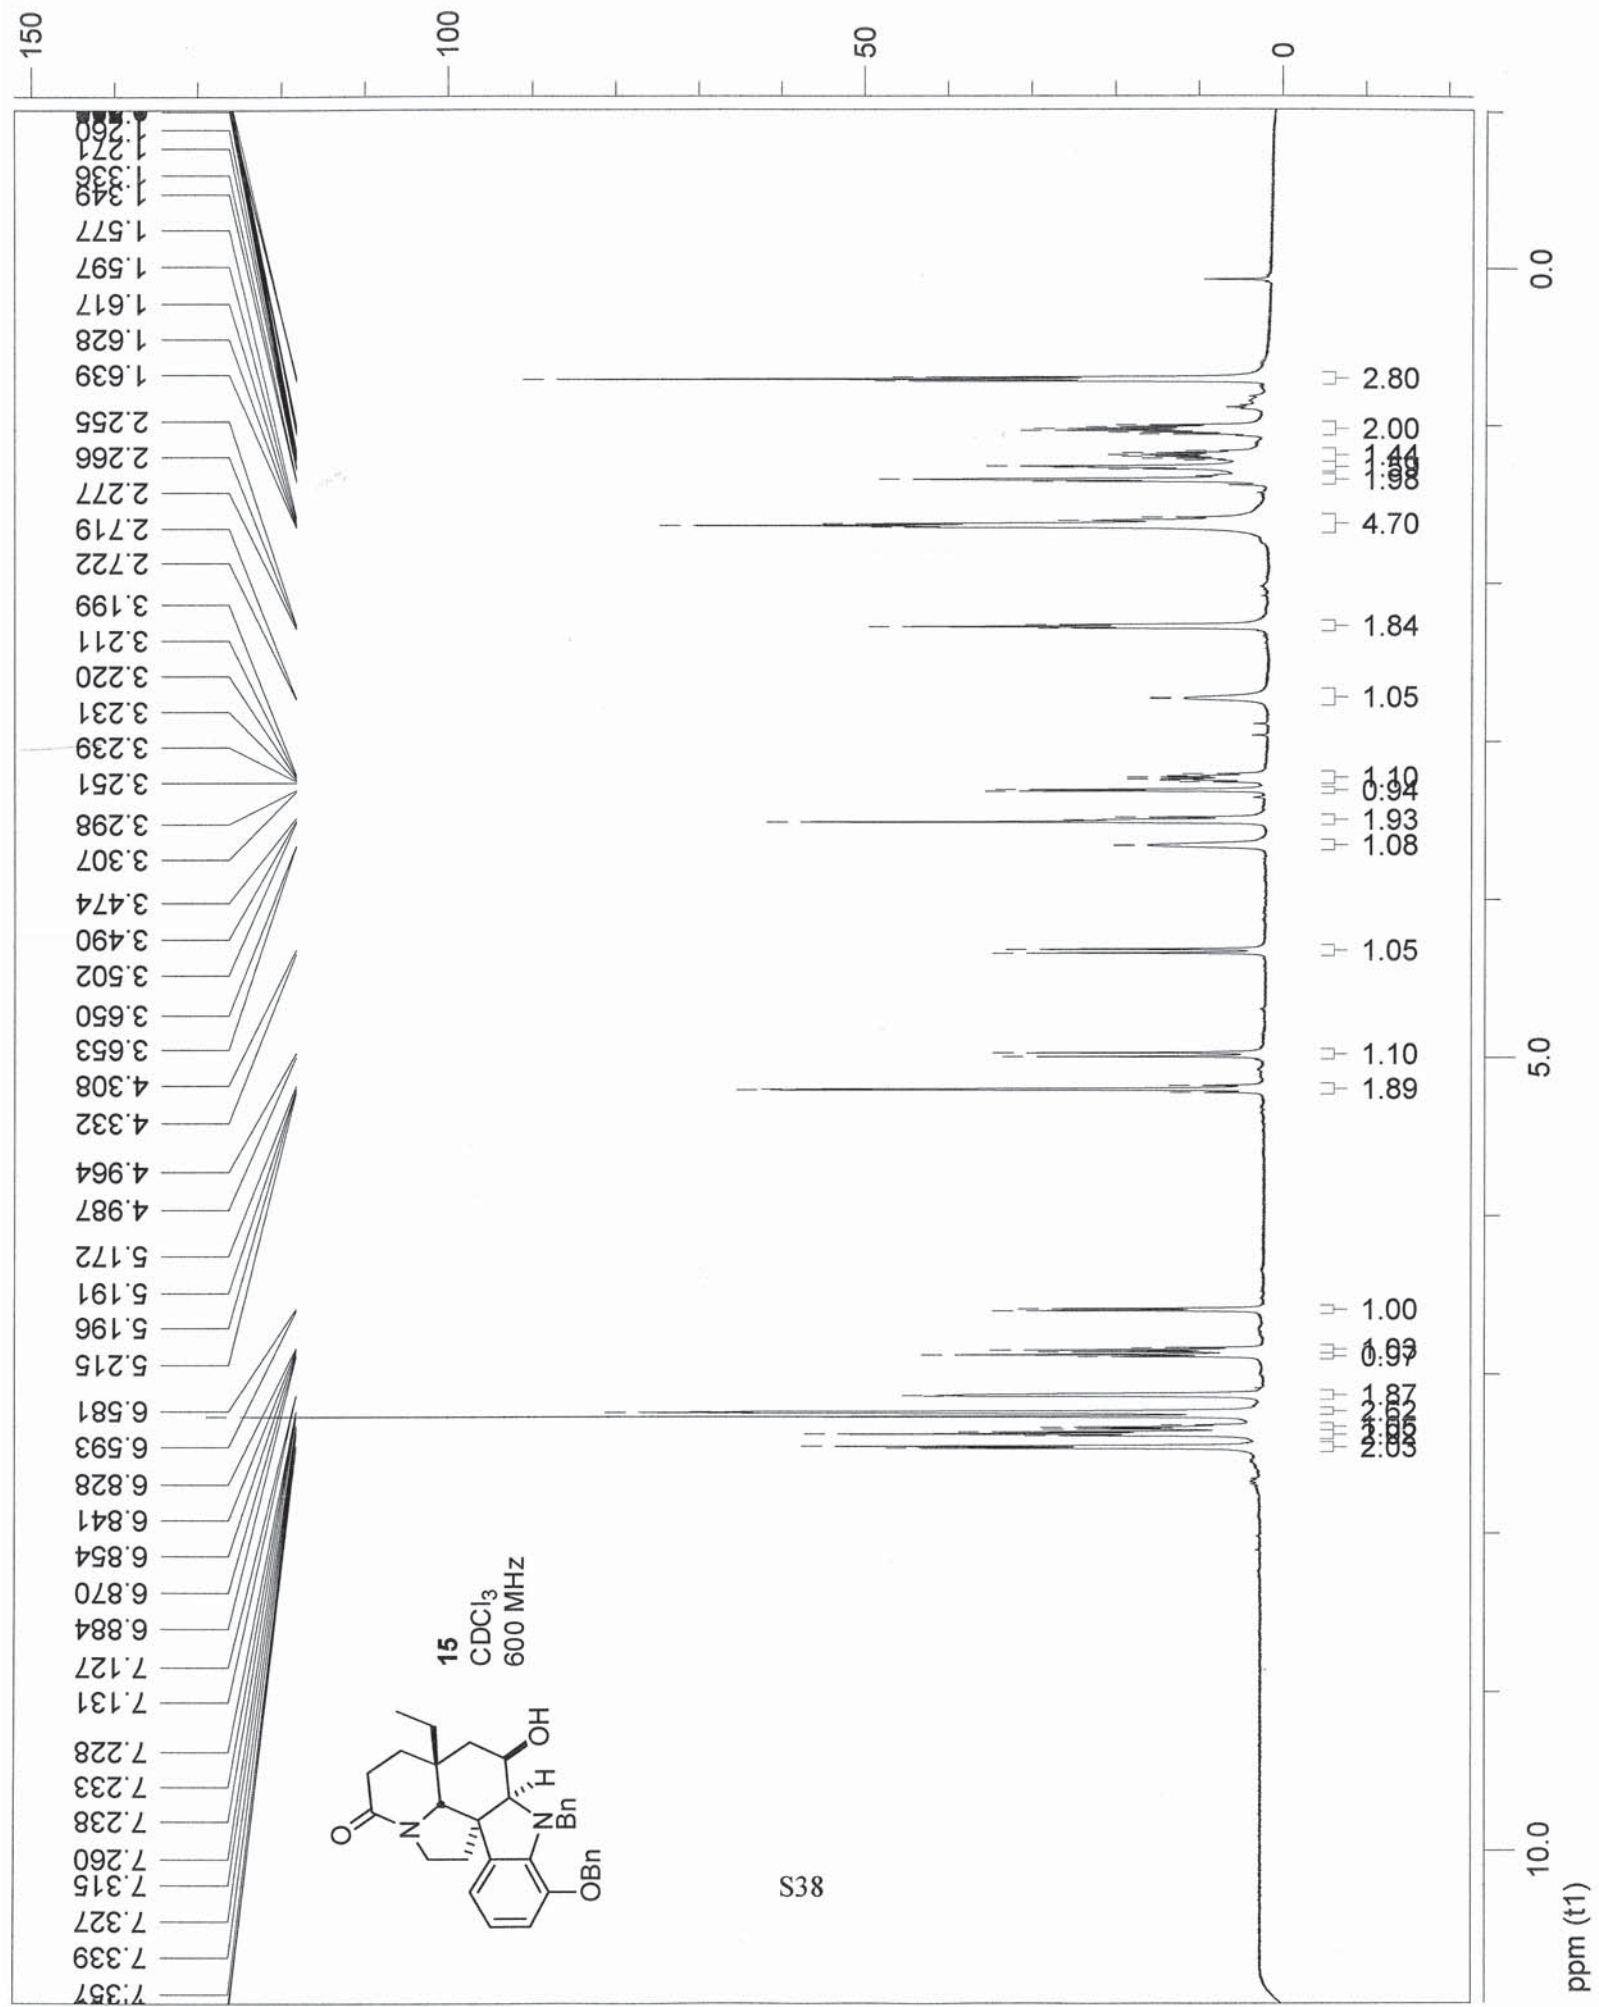



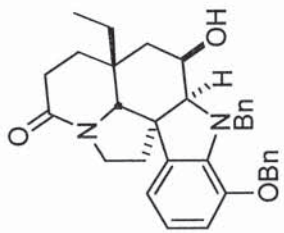

**15**  
CDCl<sub>3</sub>  
150 MHz

635

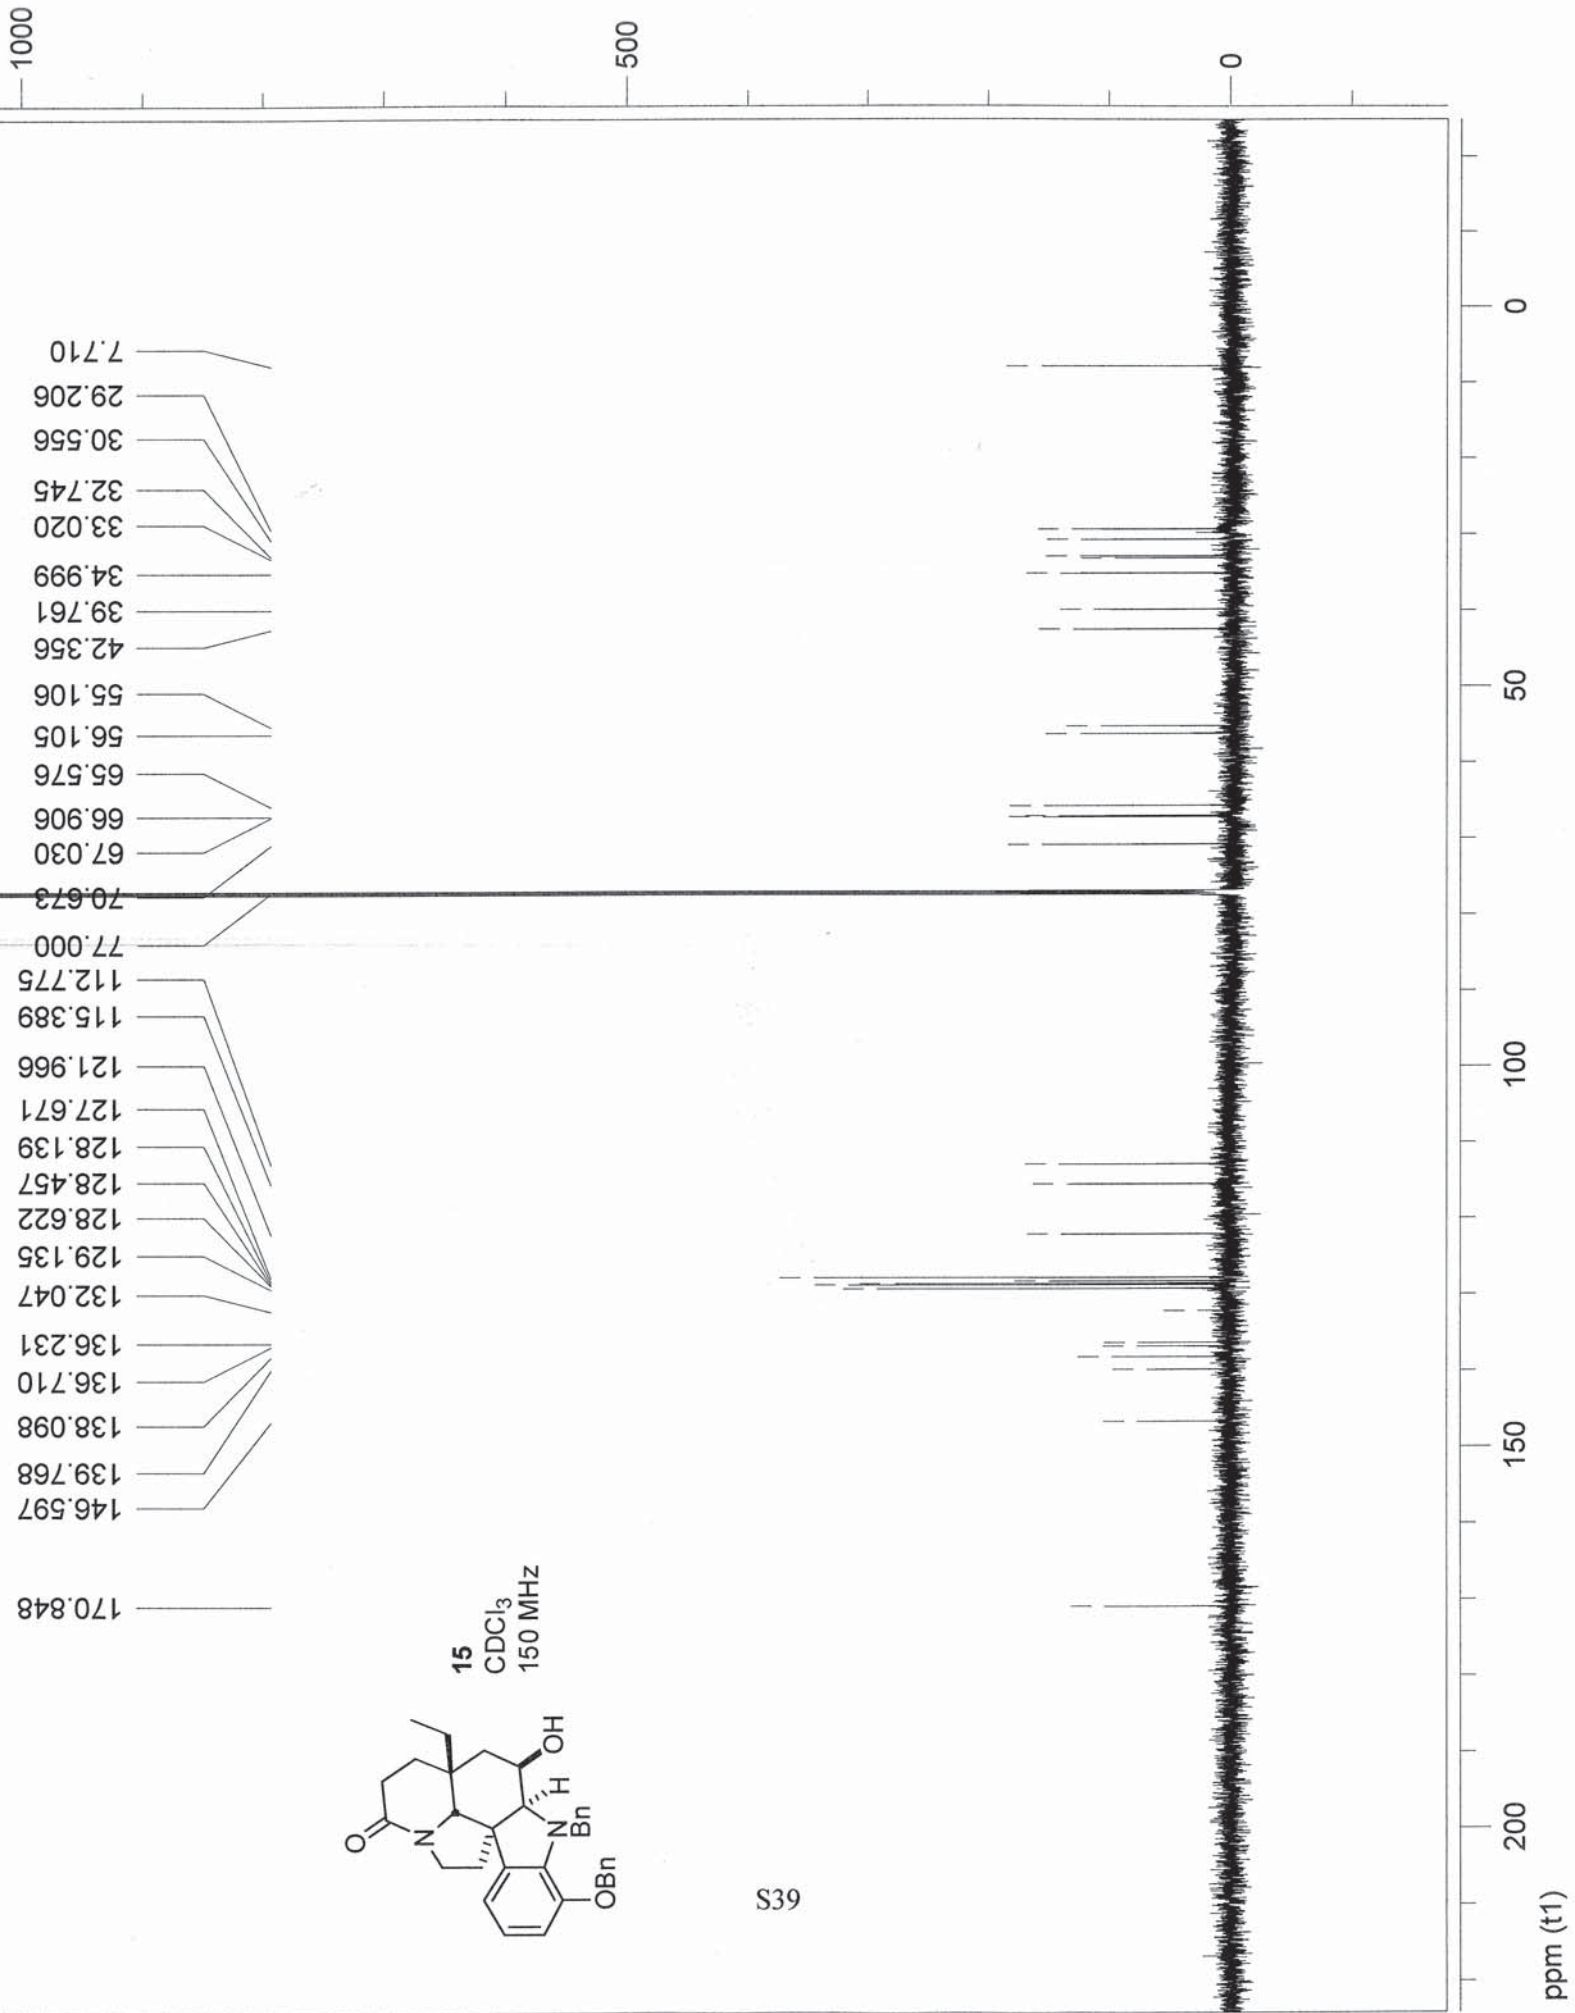





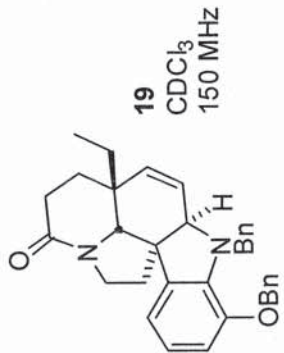

S42

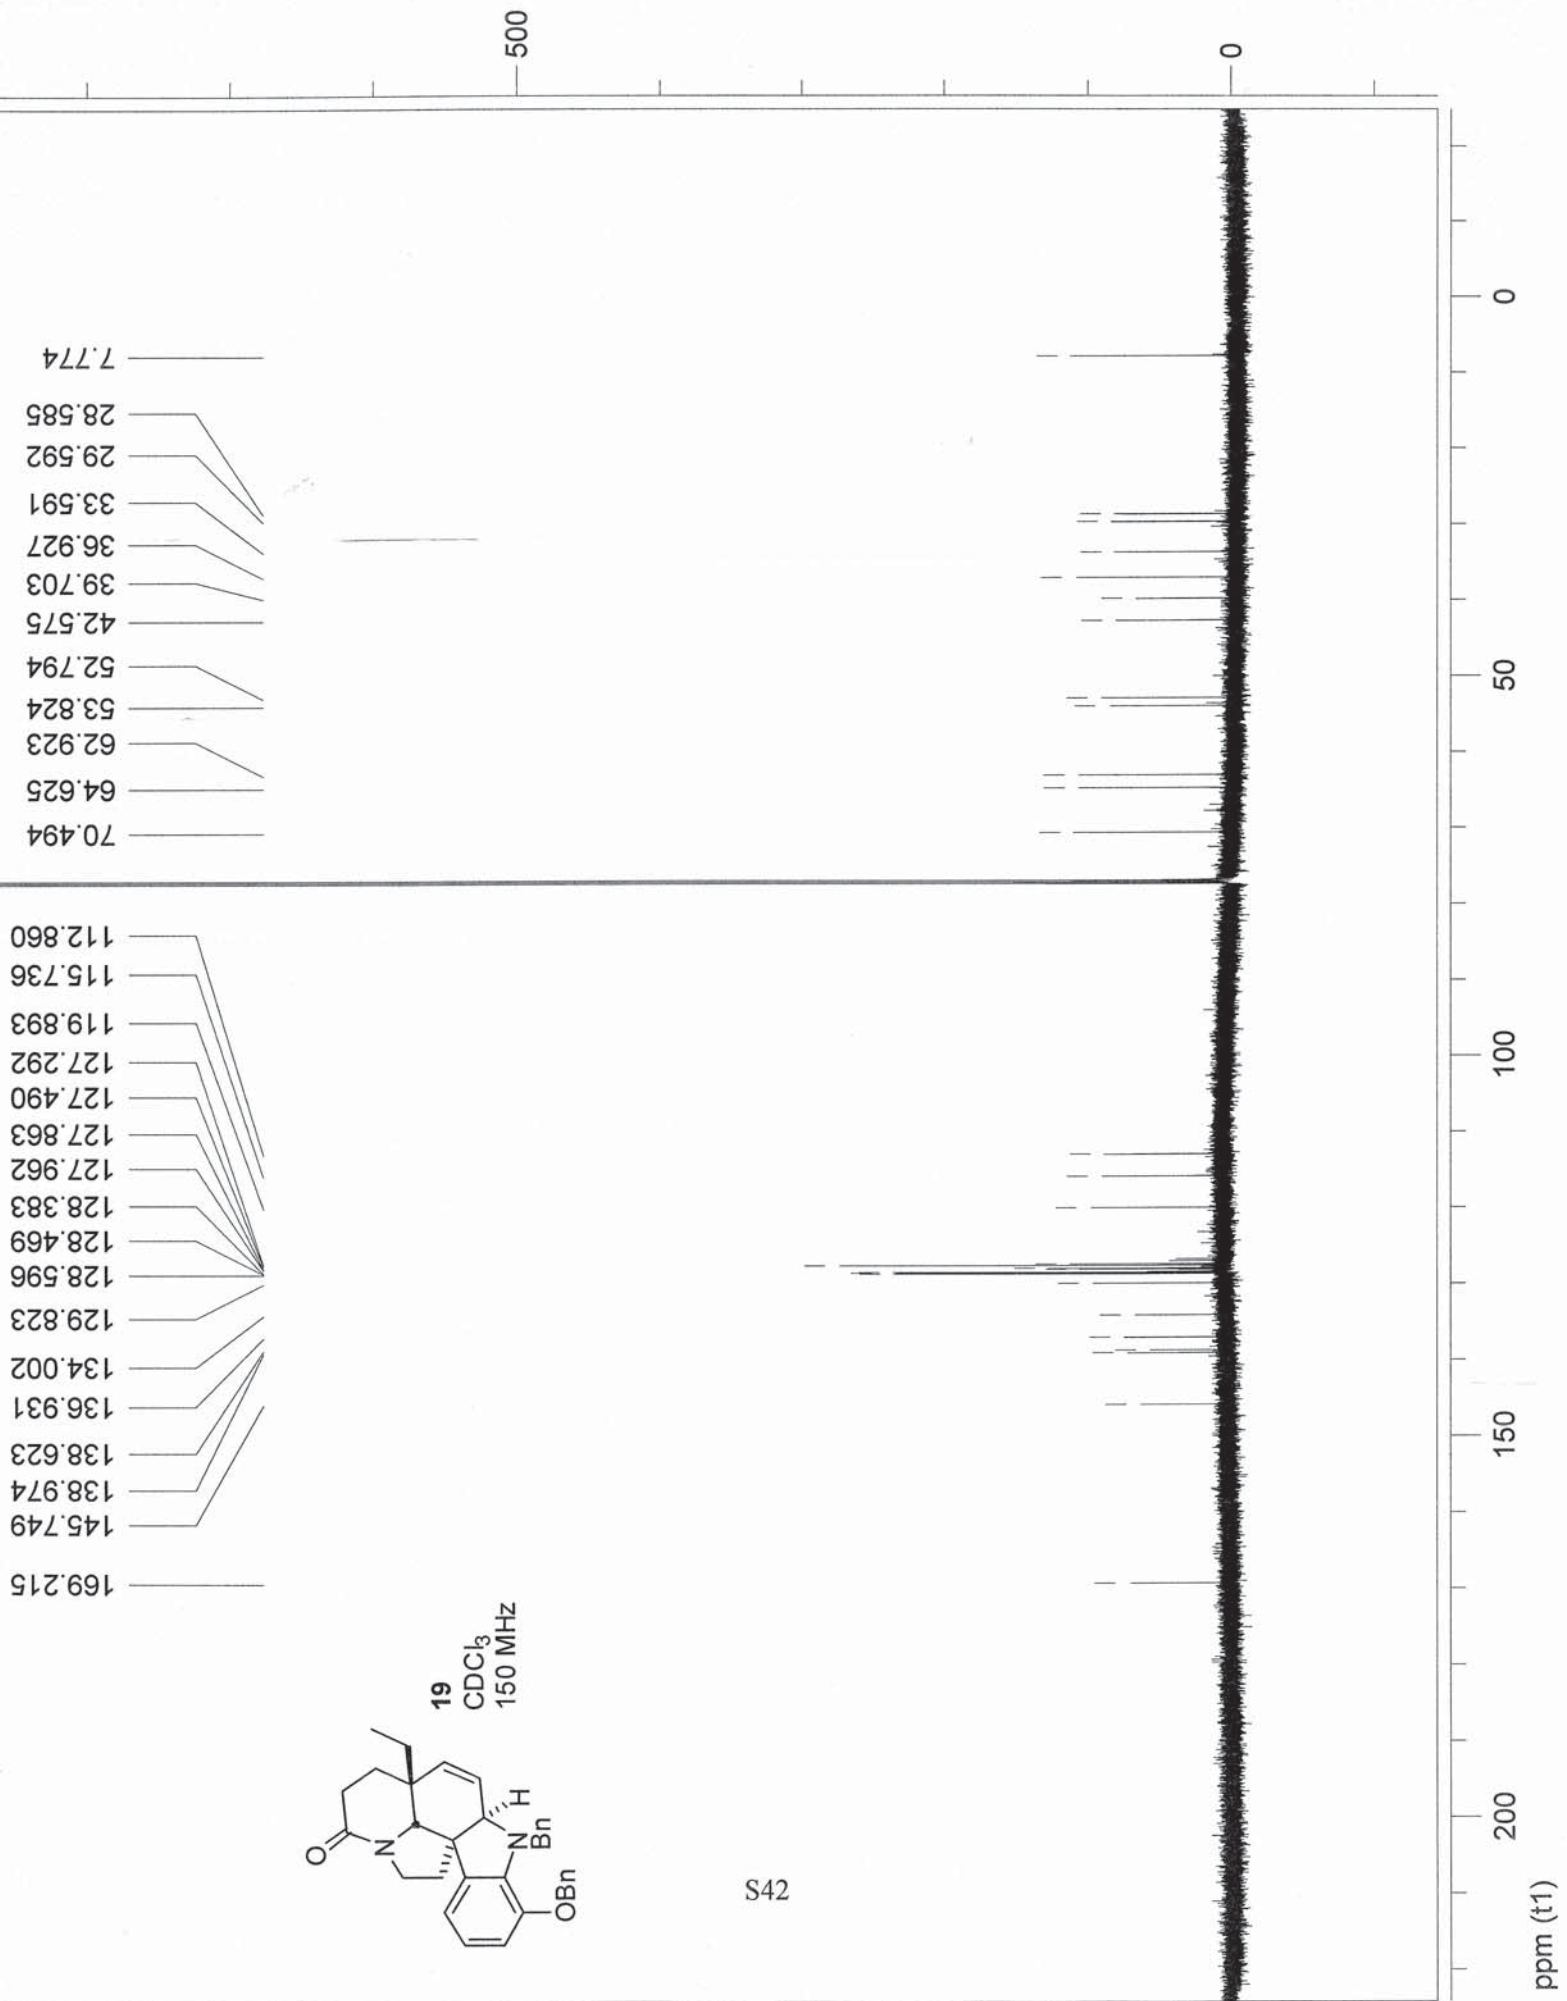



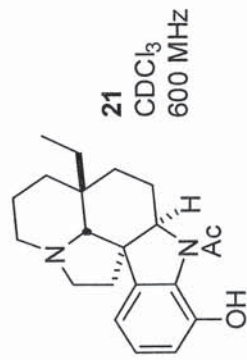

S43

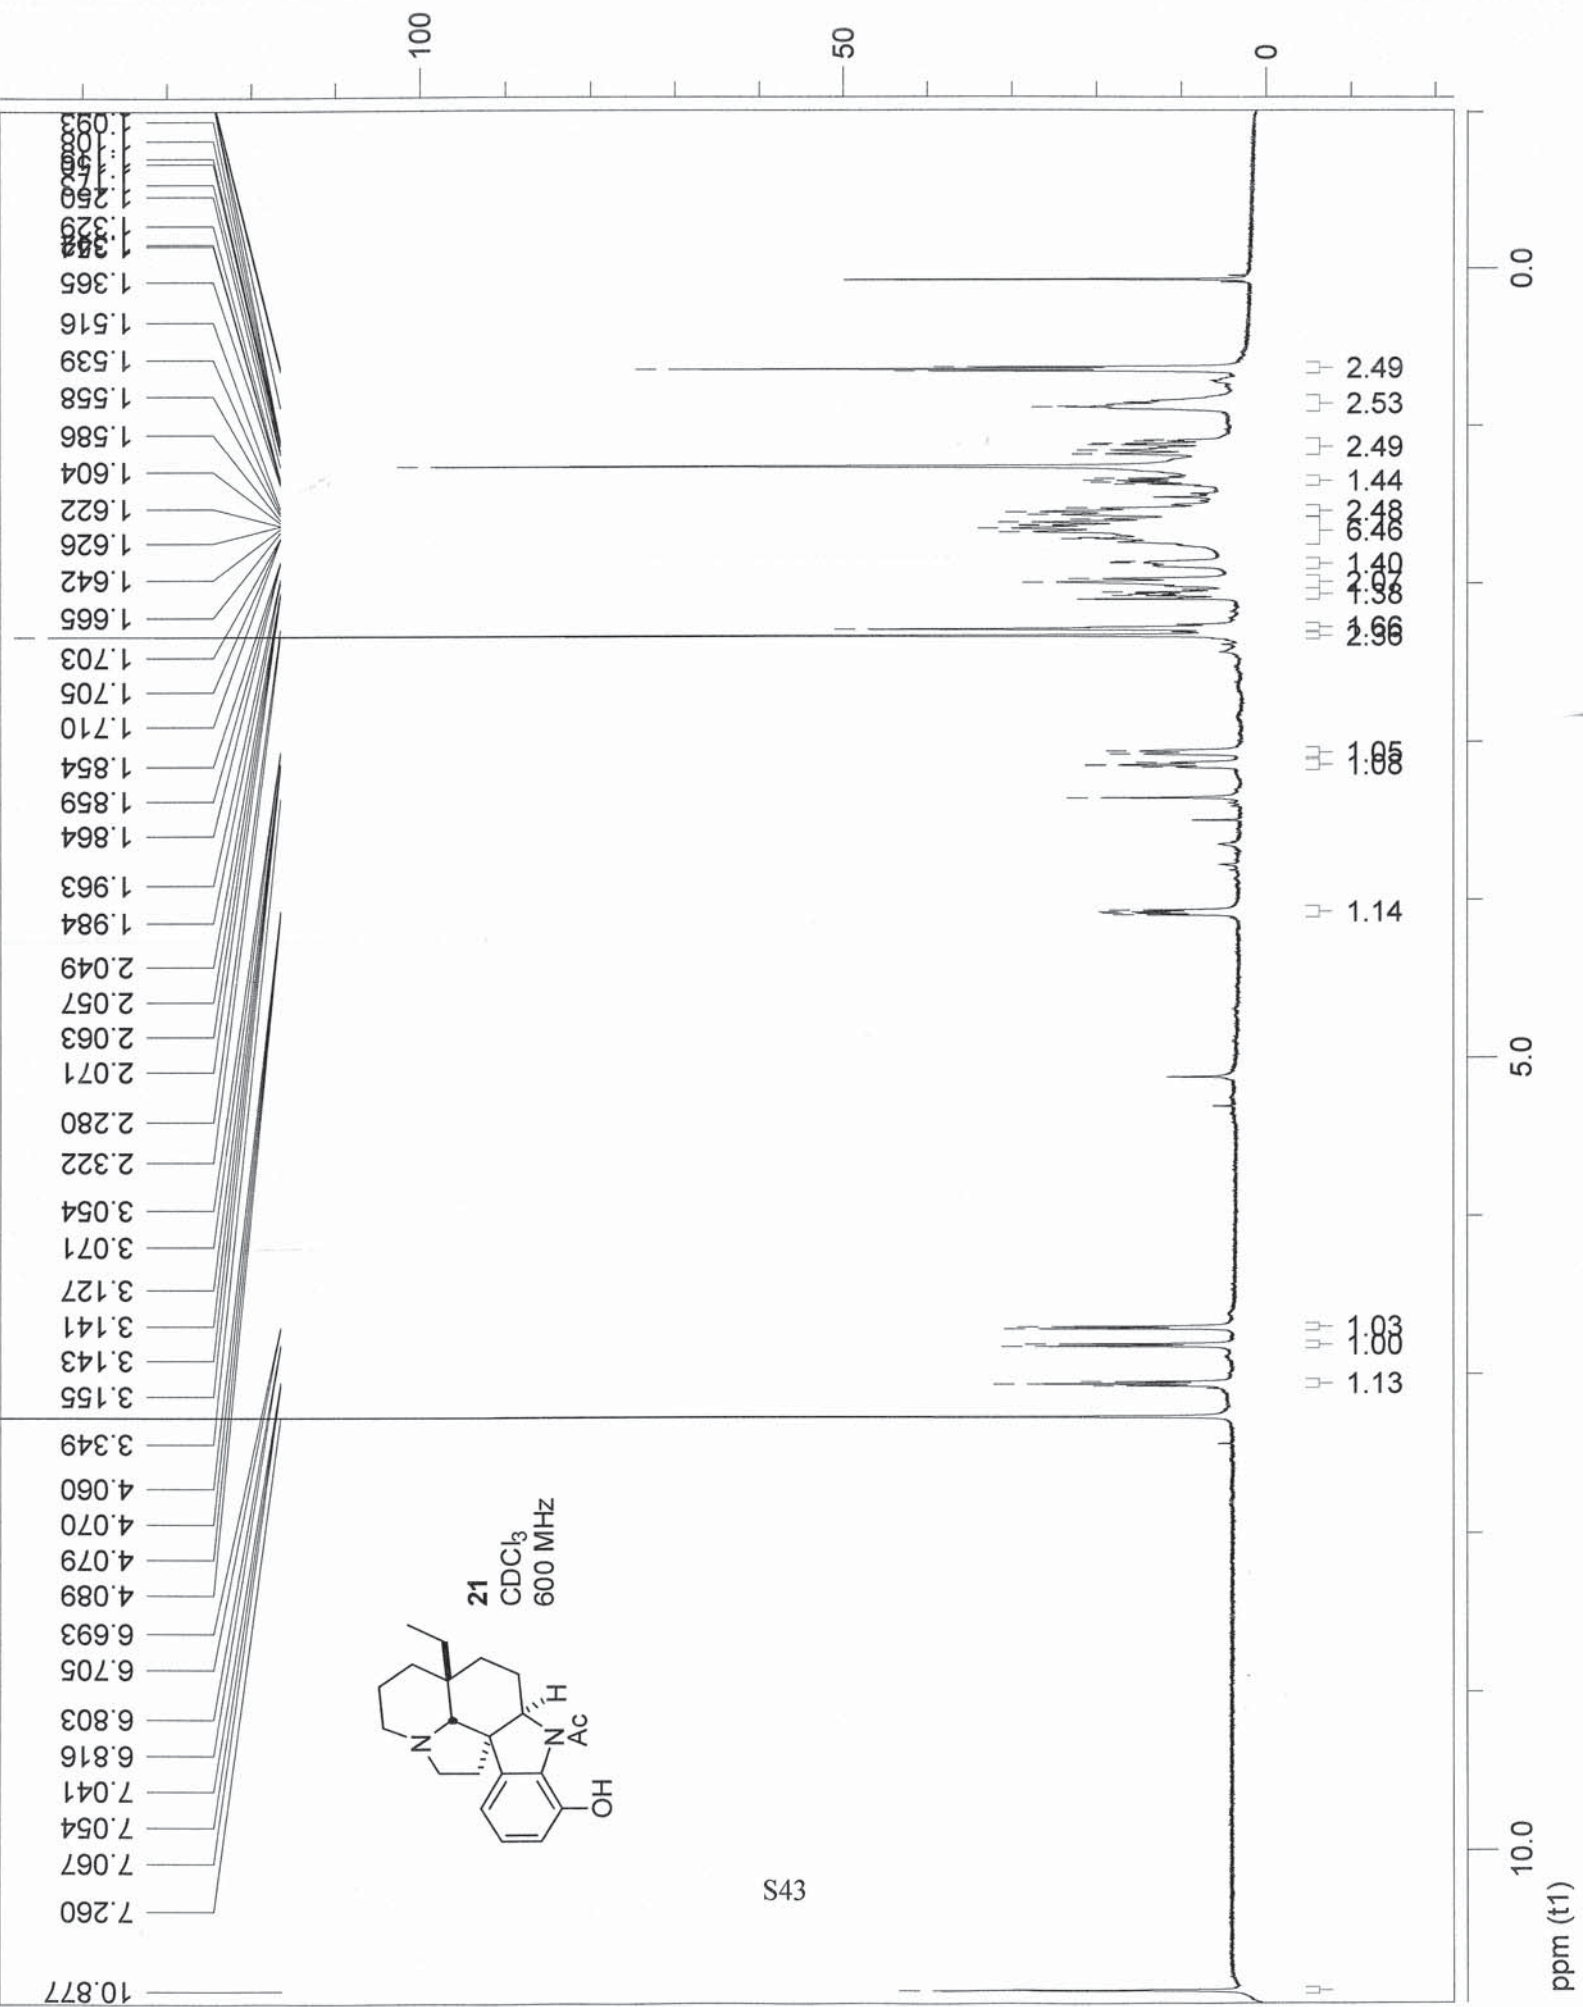



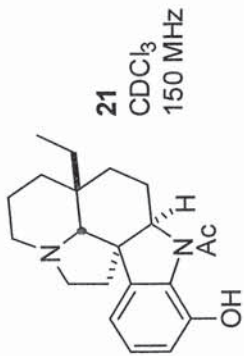

6.759  
 21.469  
 22.733  
 25.038  
 29.693  
 30.076  
 33.975  
 35.503  
 39.108  
 52.542  
 52.765  
 53.712  
 69.682  
 70.853  
 77.000

113.482  
 117.547  
 126.879  
 127.785  
 141.219  
 147.188  
 169.227

S44

ppm (t1)

200

150

100

50

0

0

500

1000

1500

2000

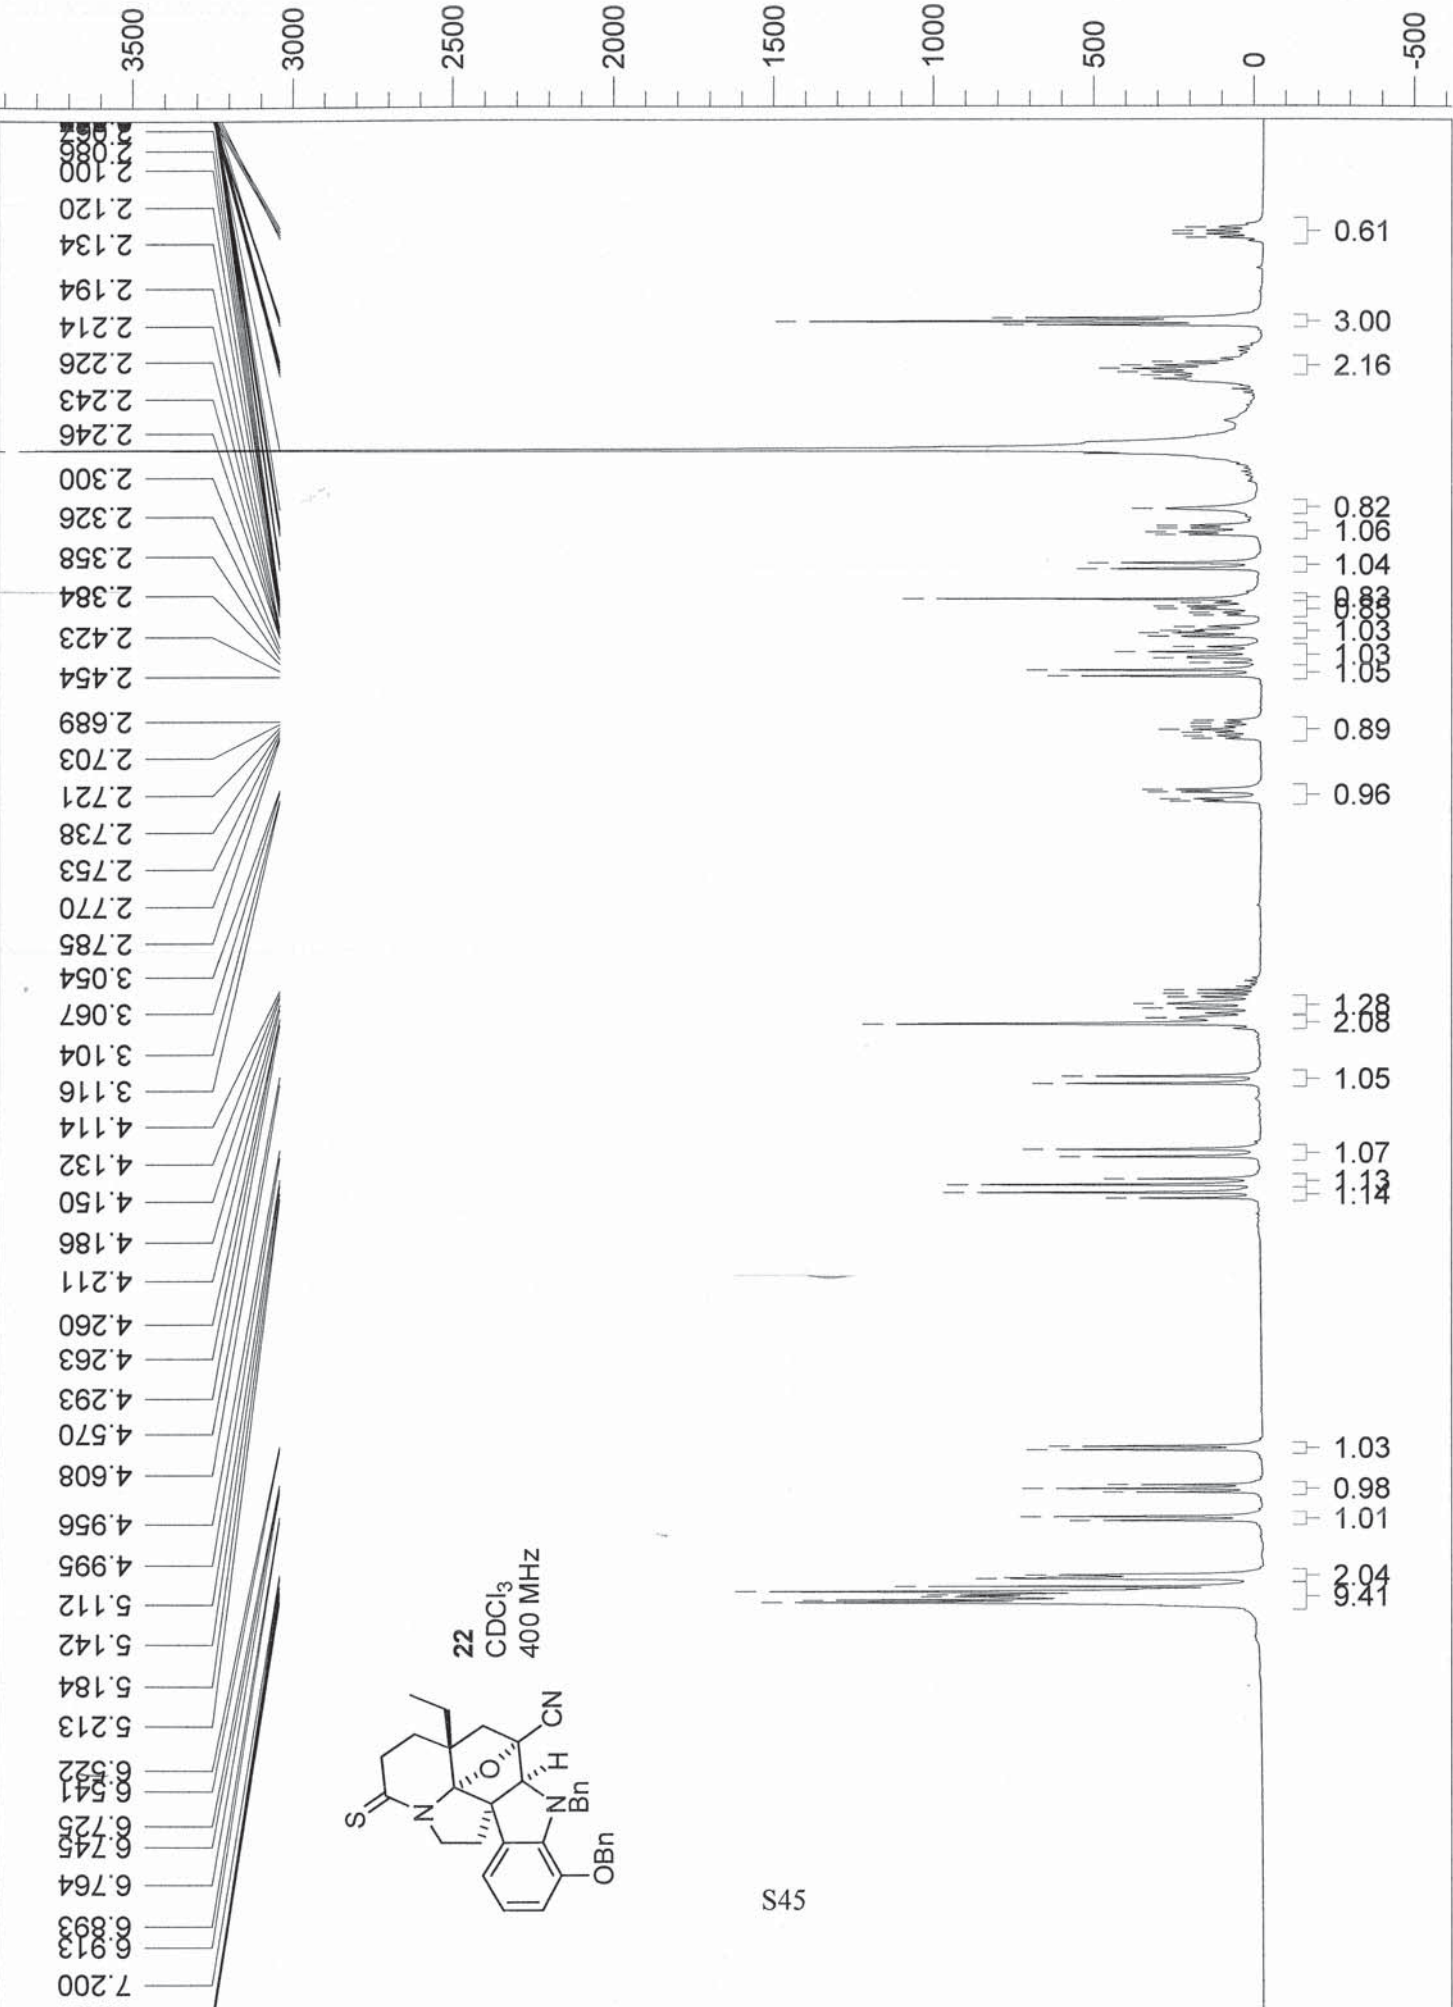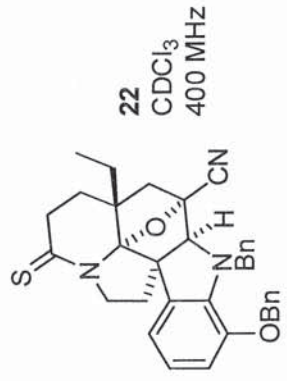

S45

0.0

5.0

ppm ( $\tau$ )

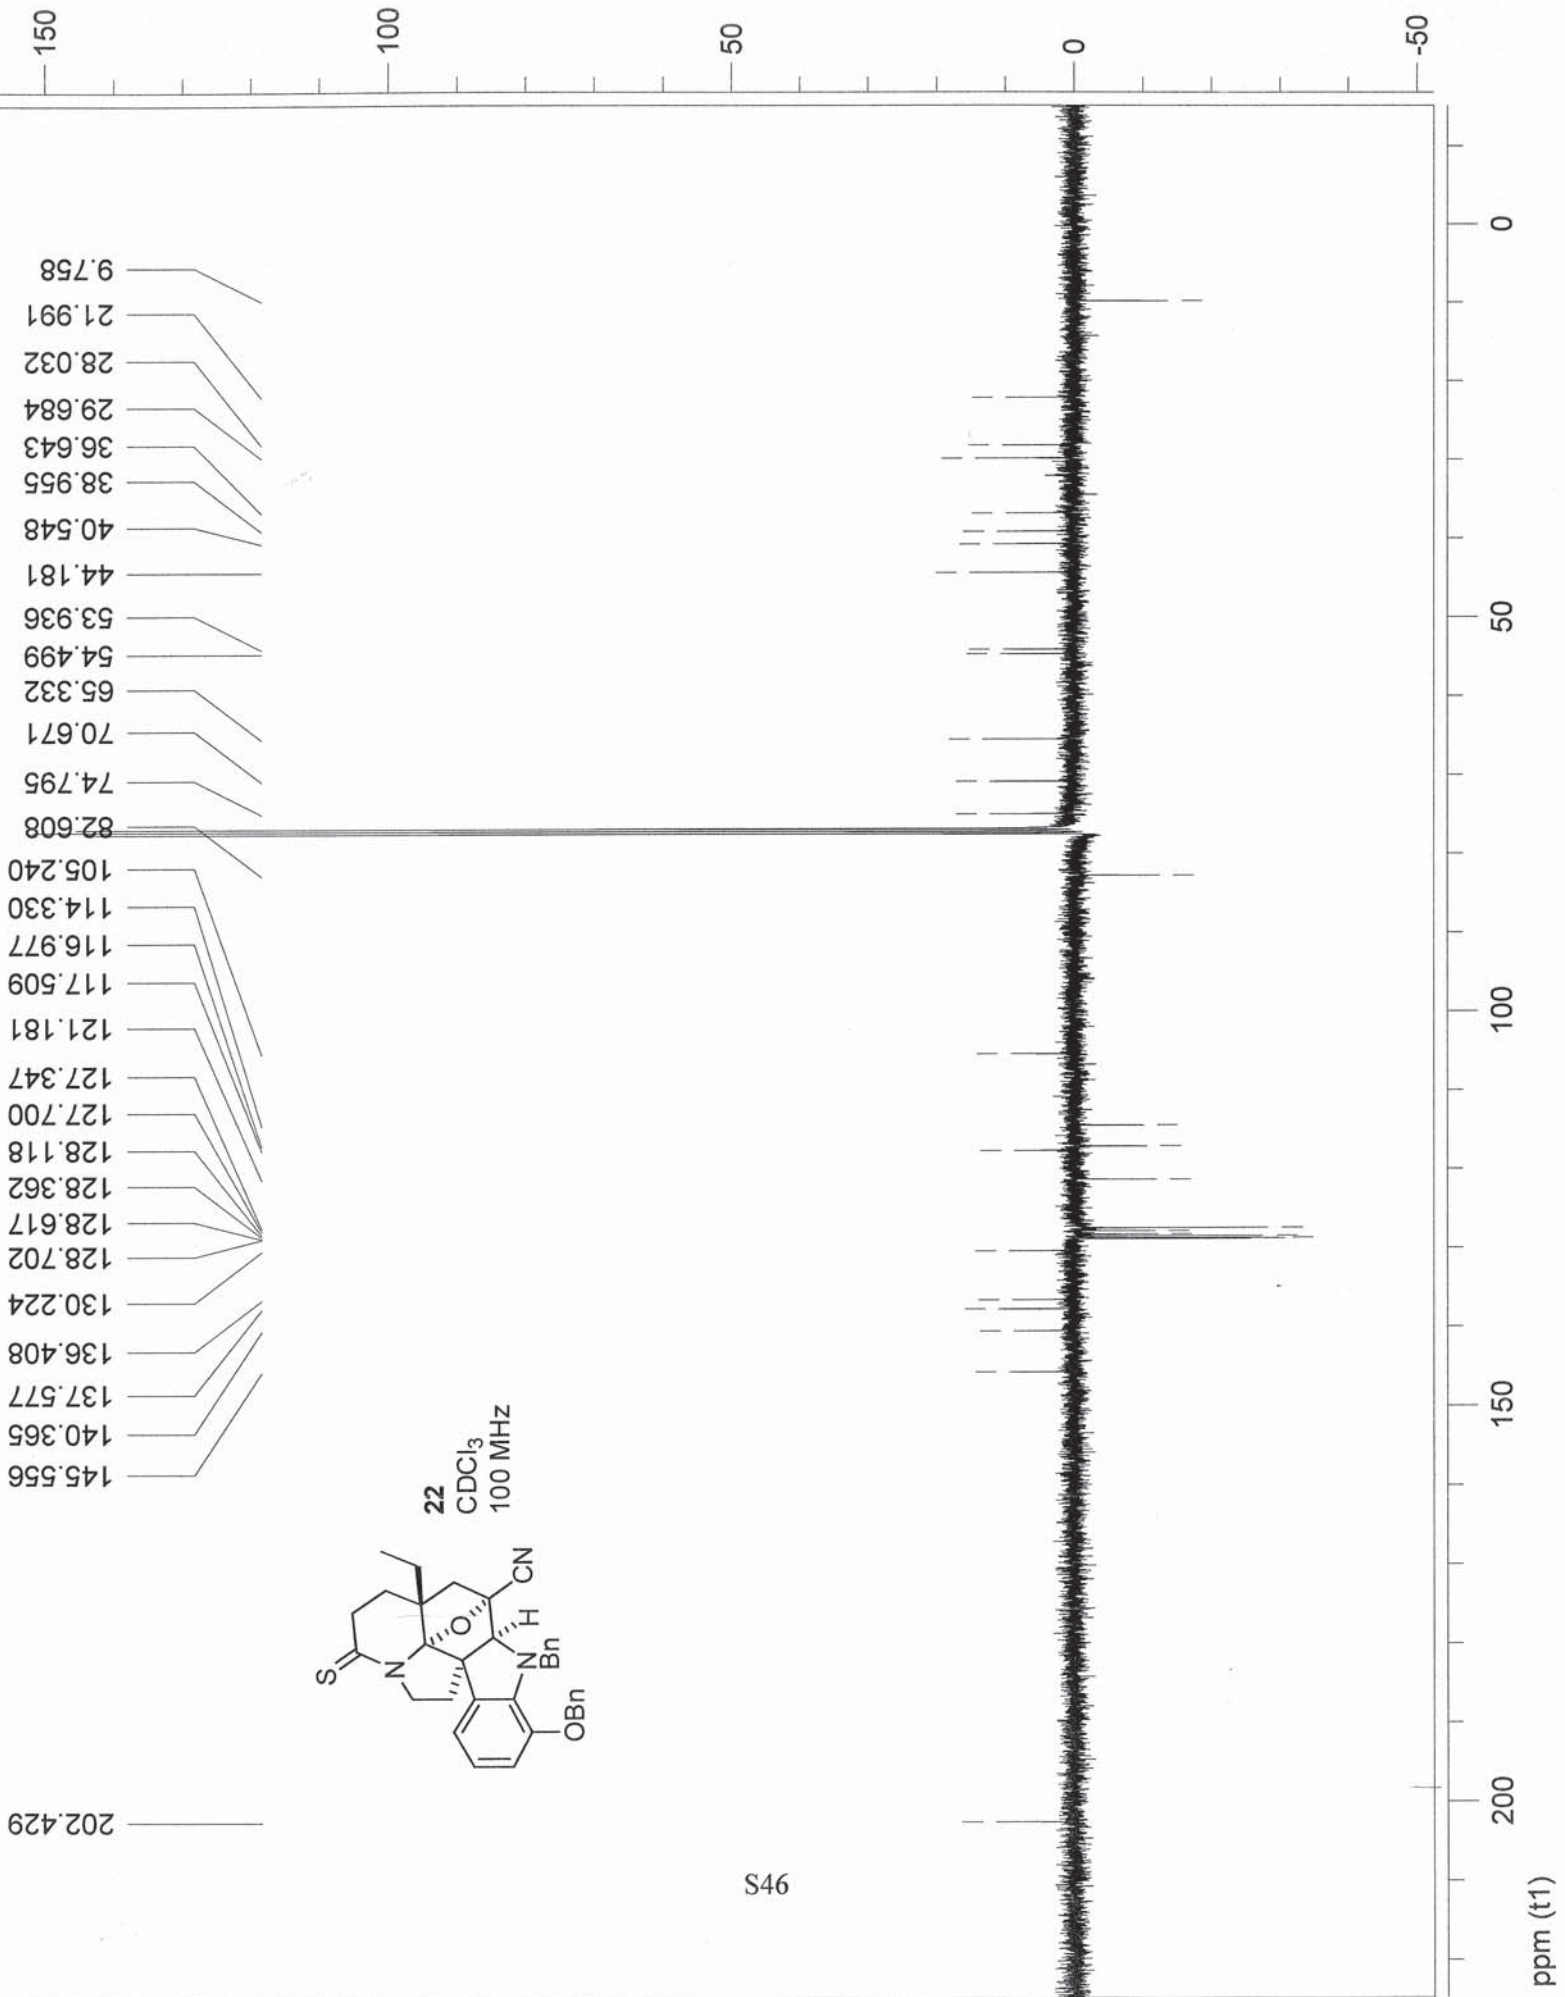

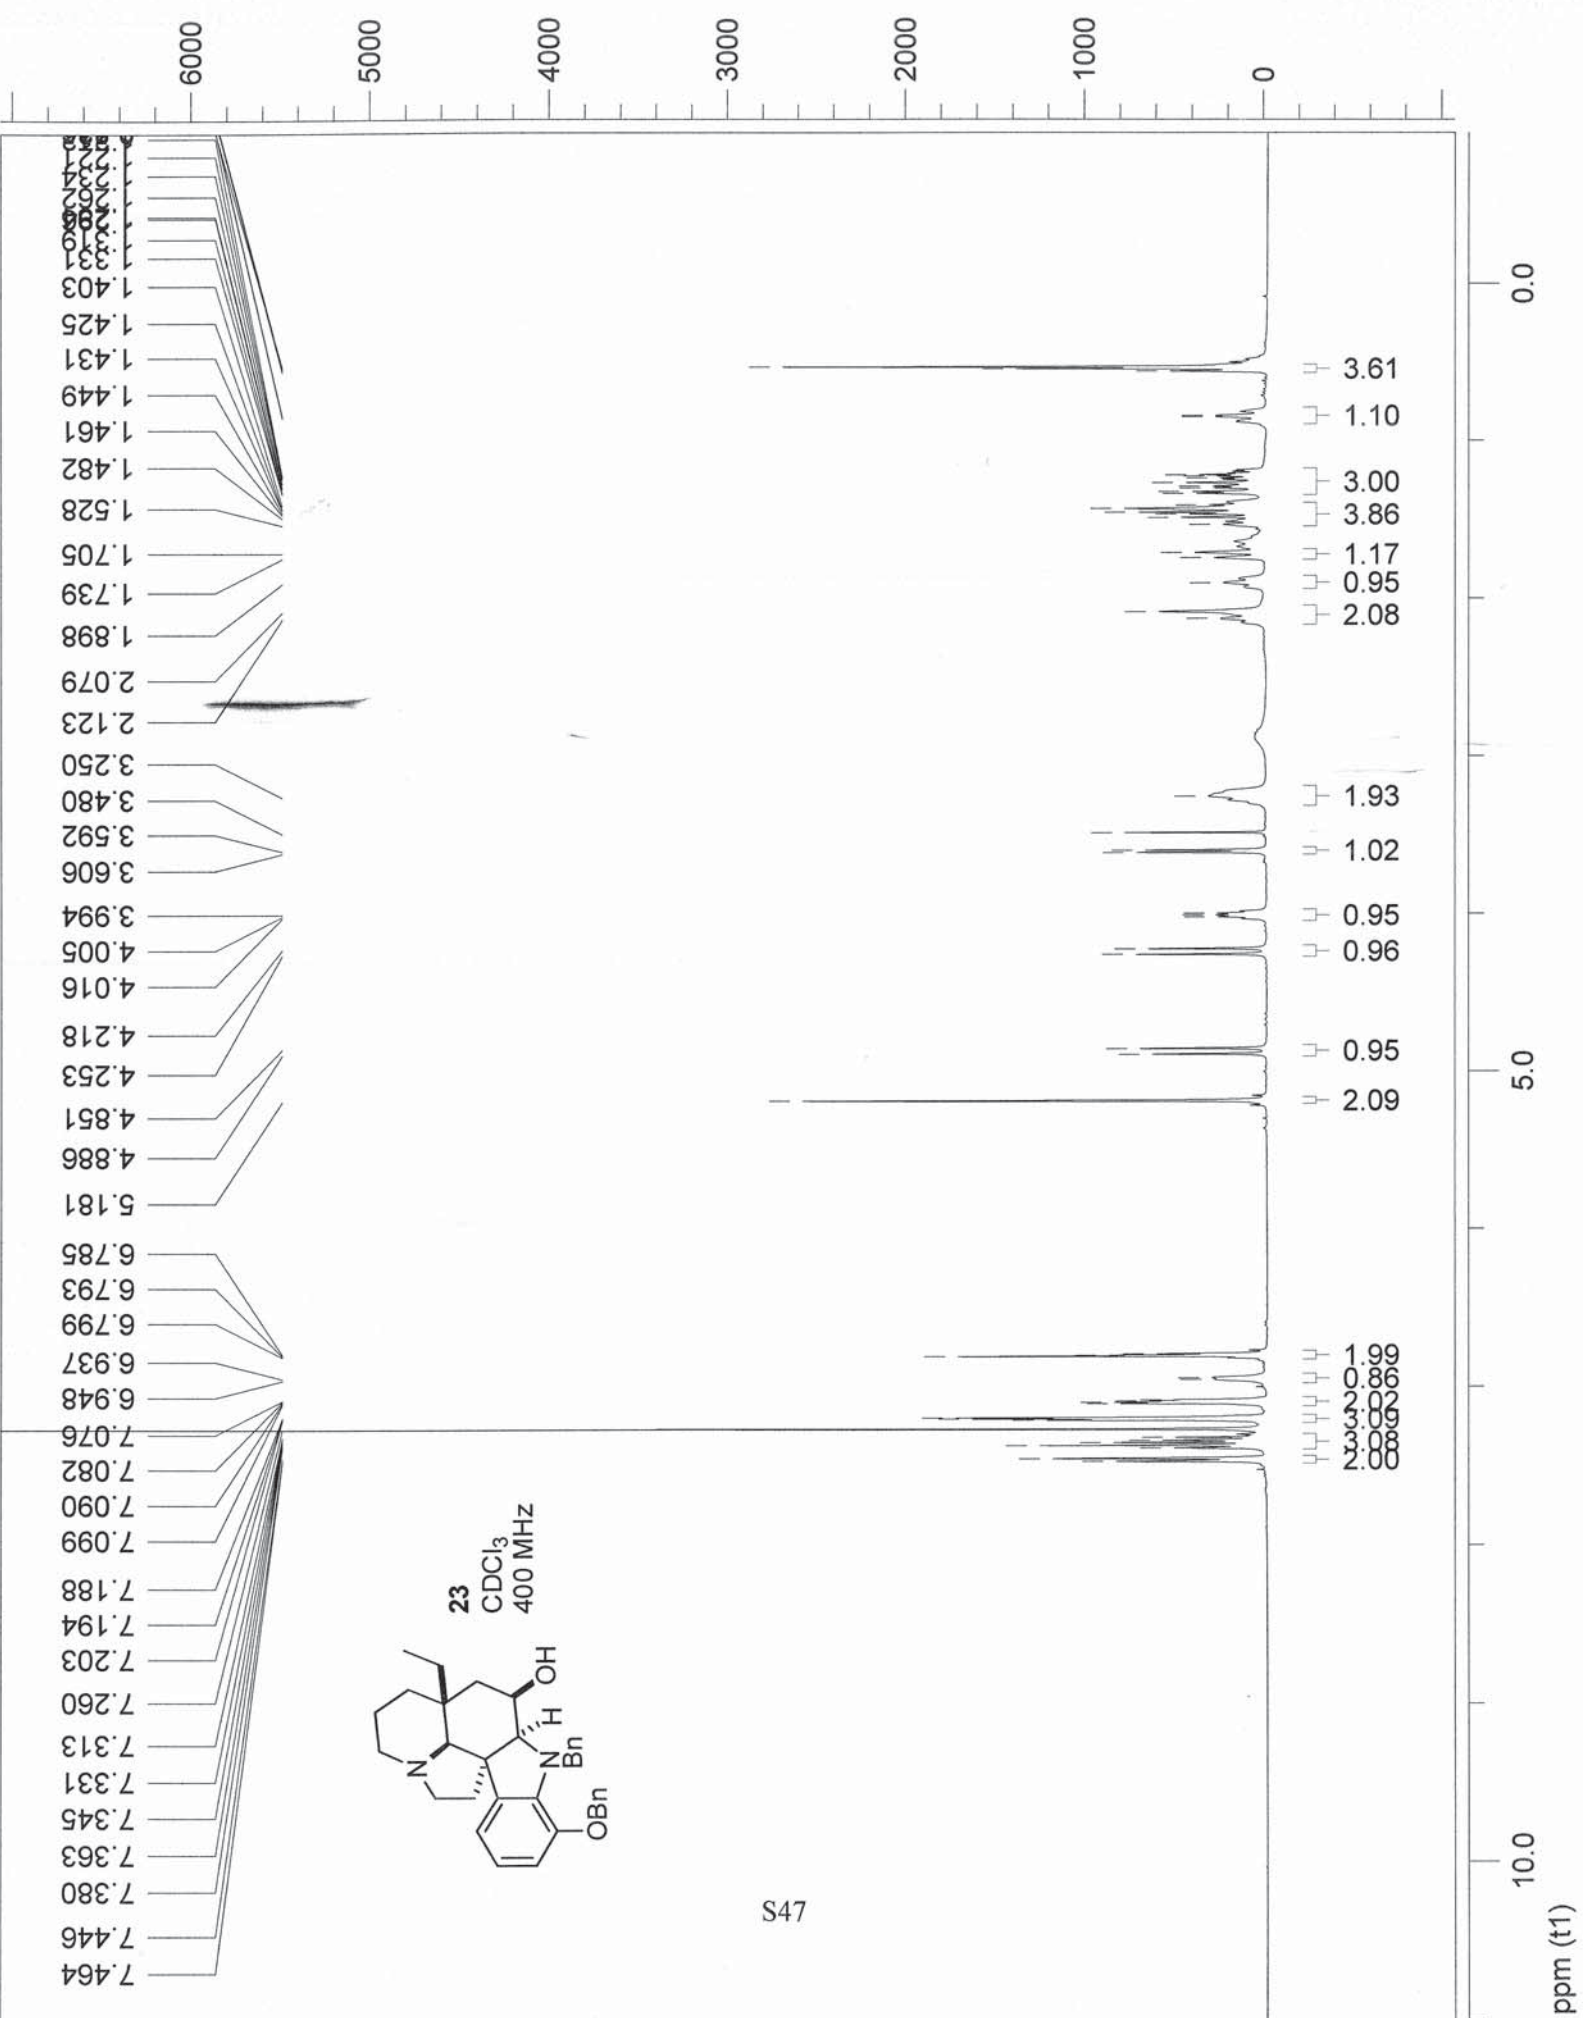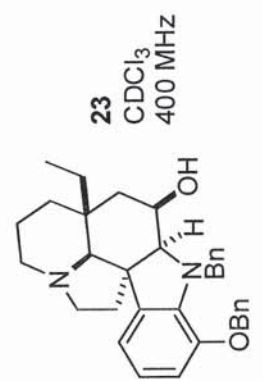



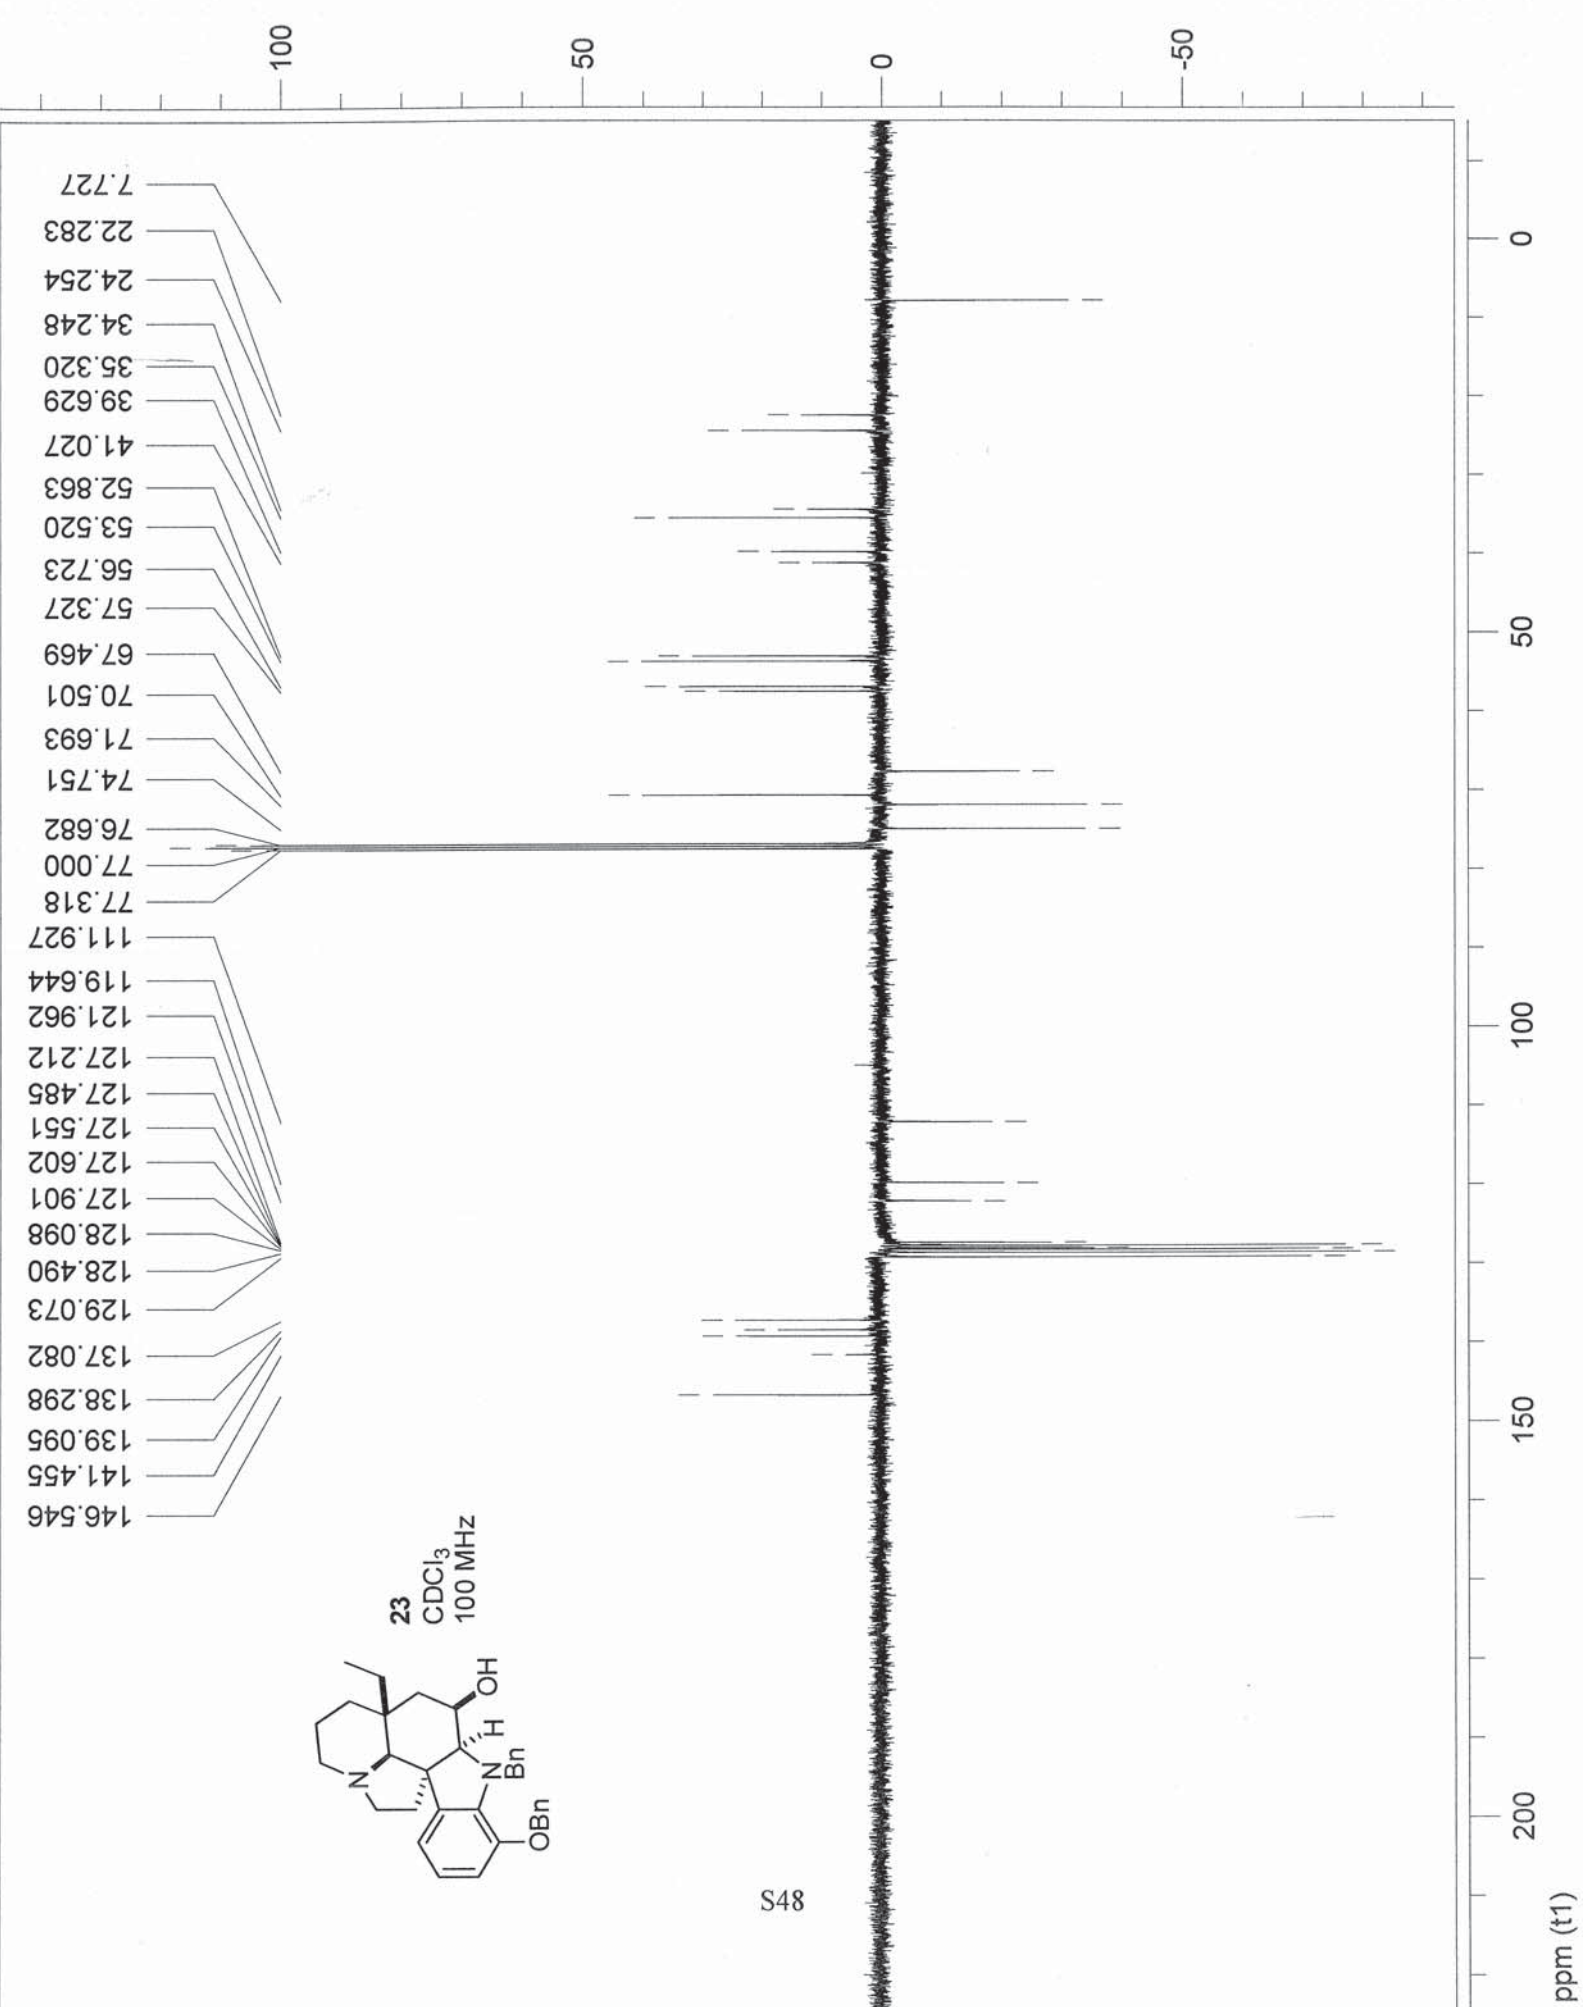



ppm (t1)

10.0

5.0

0.0

24  
CDCl<sub>3</sub>  
600 MHz

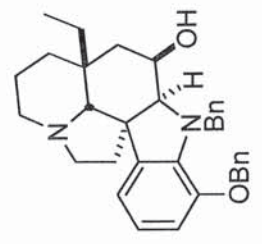

648

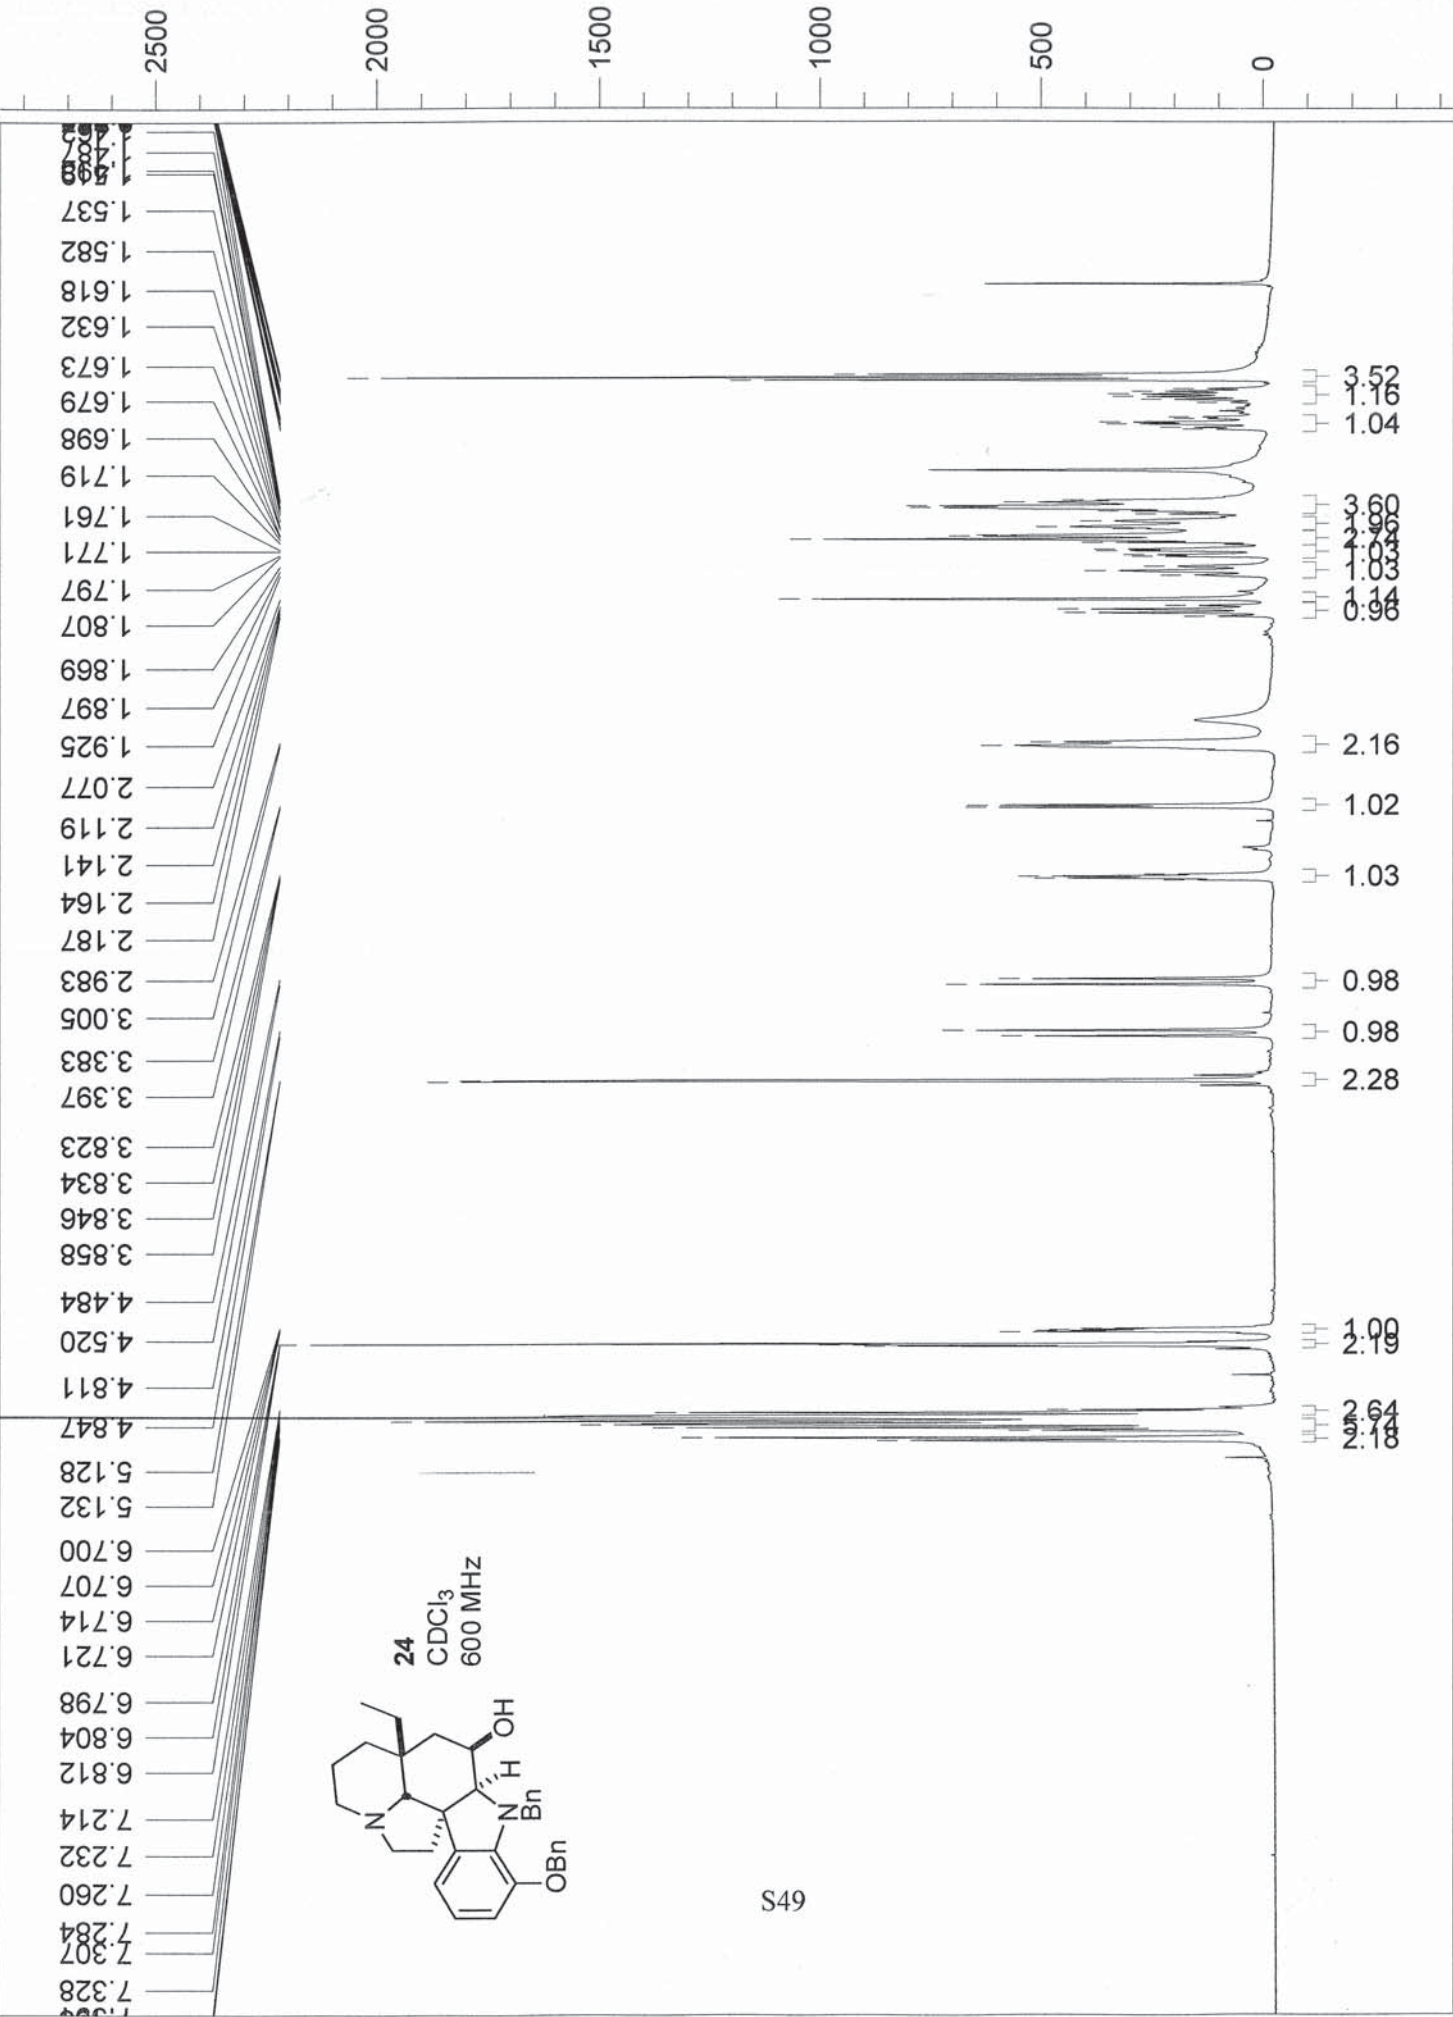

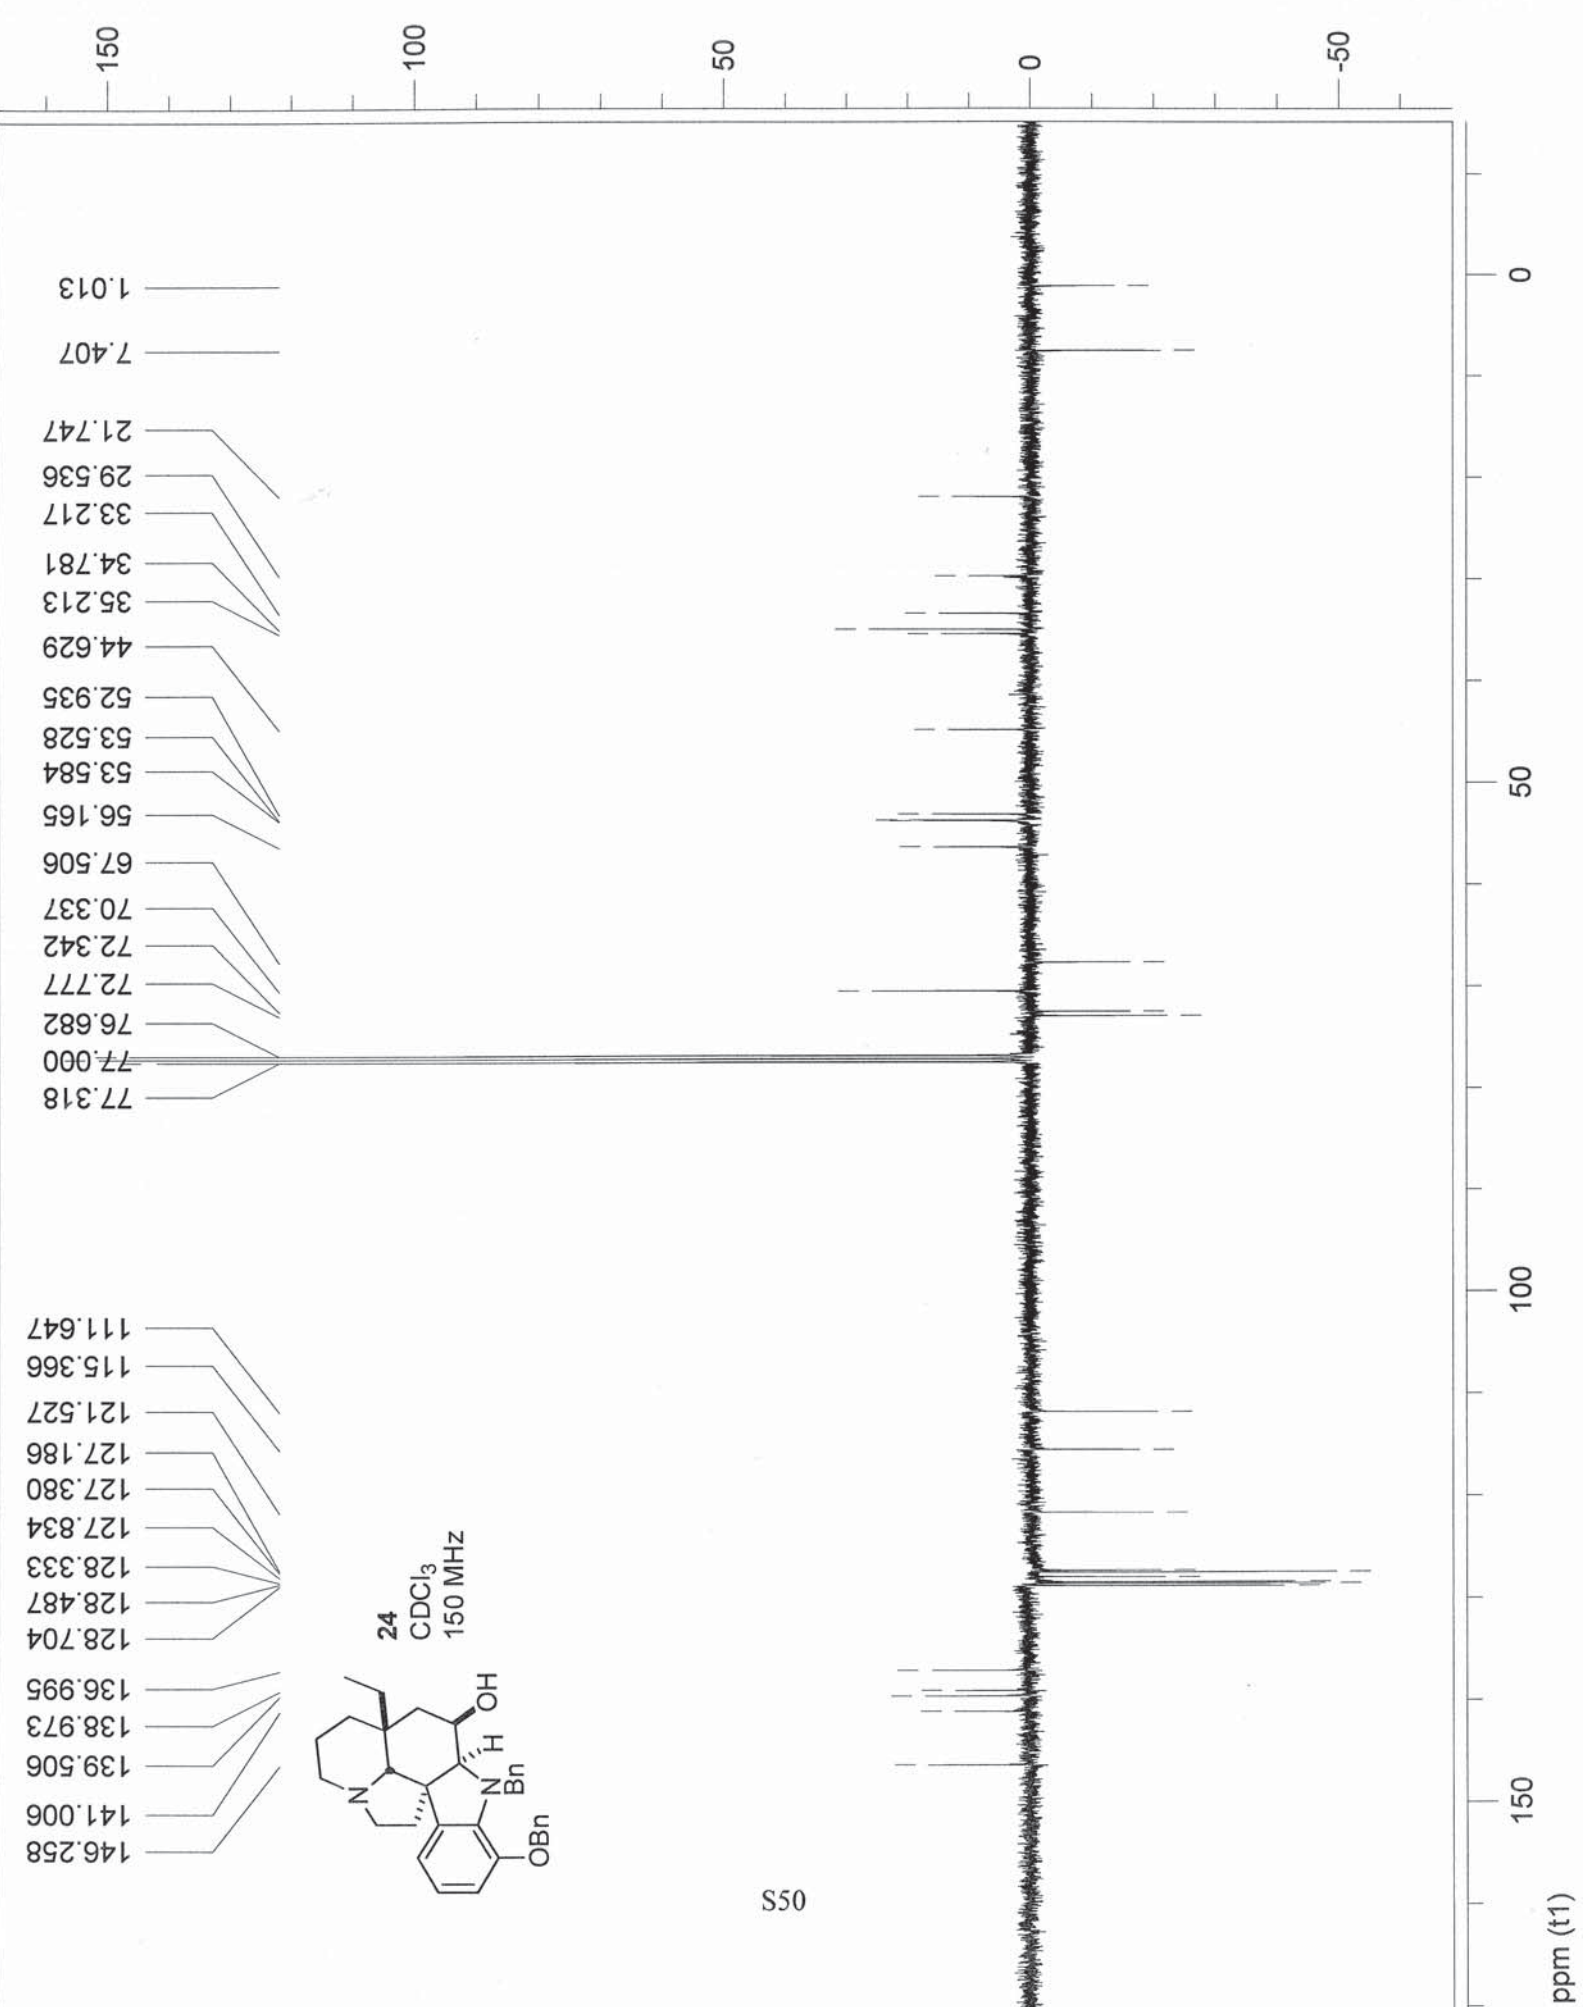

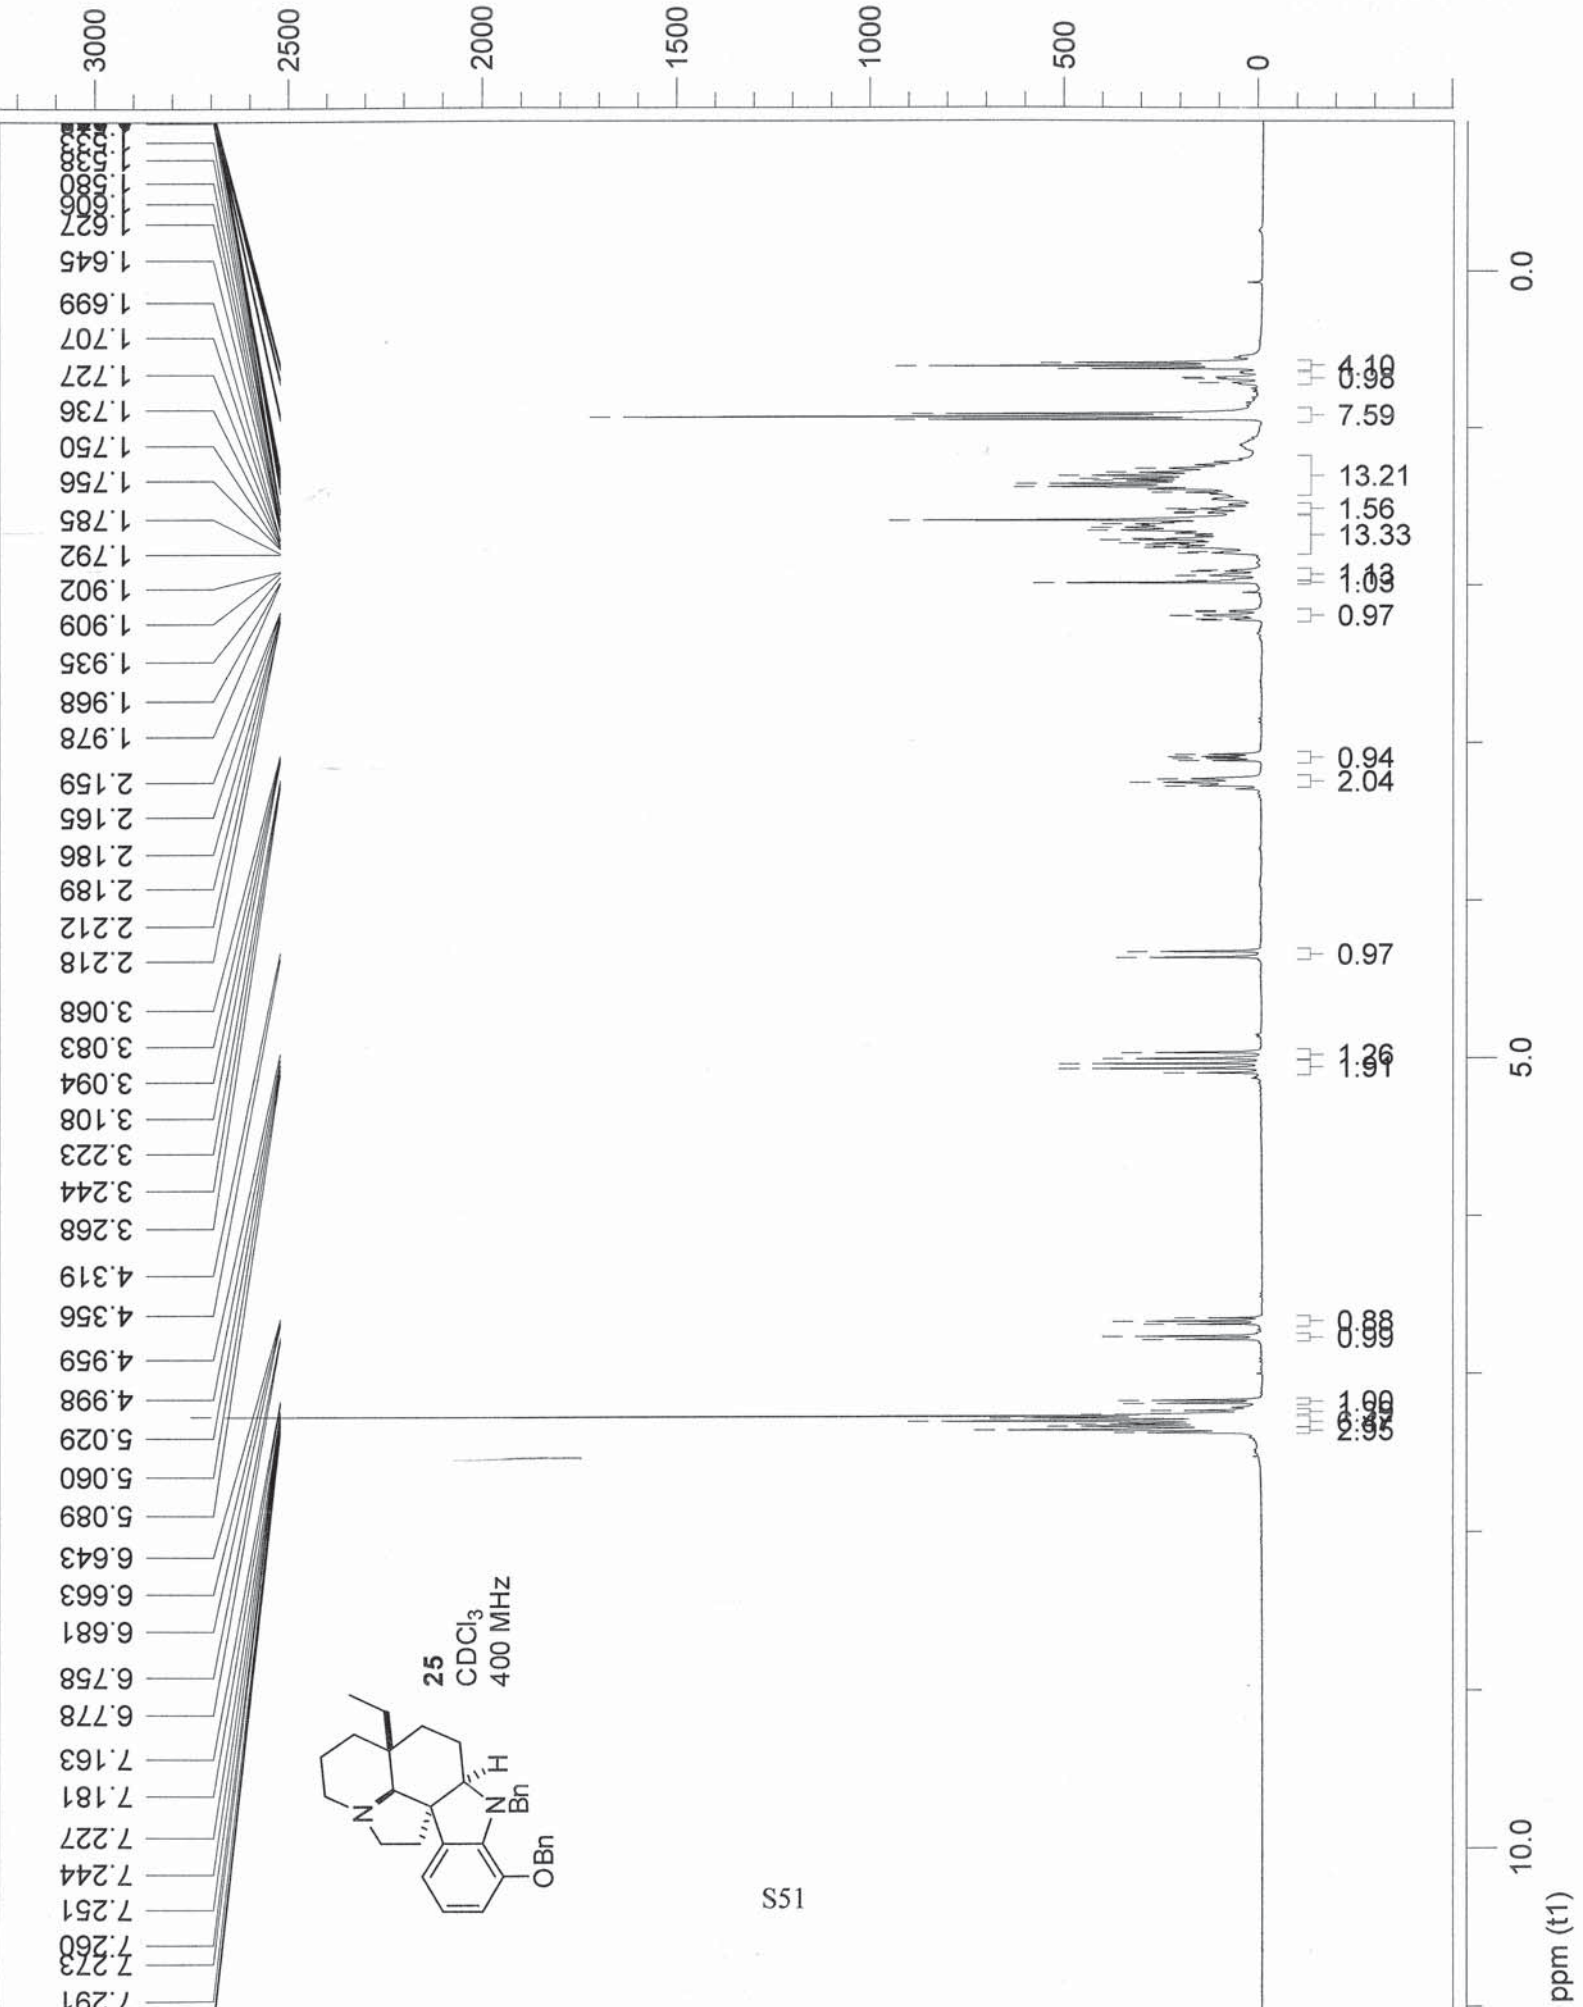

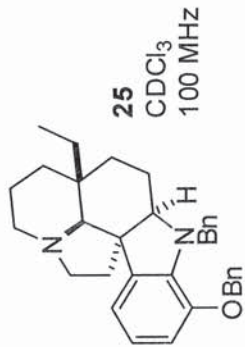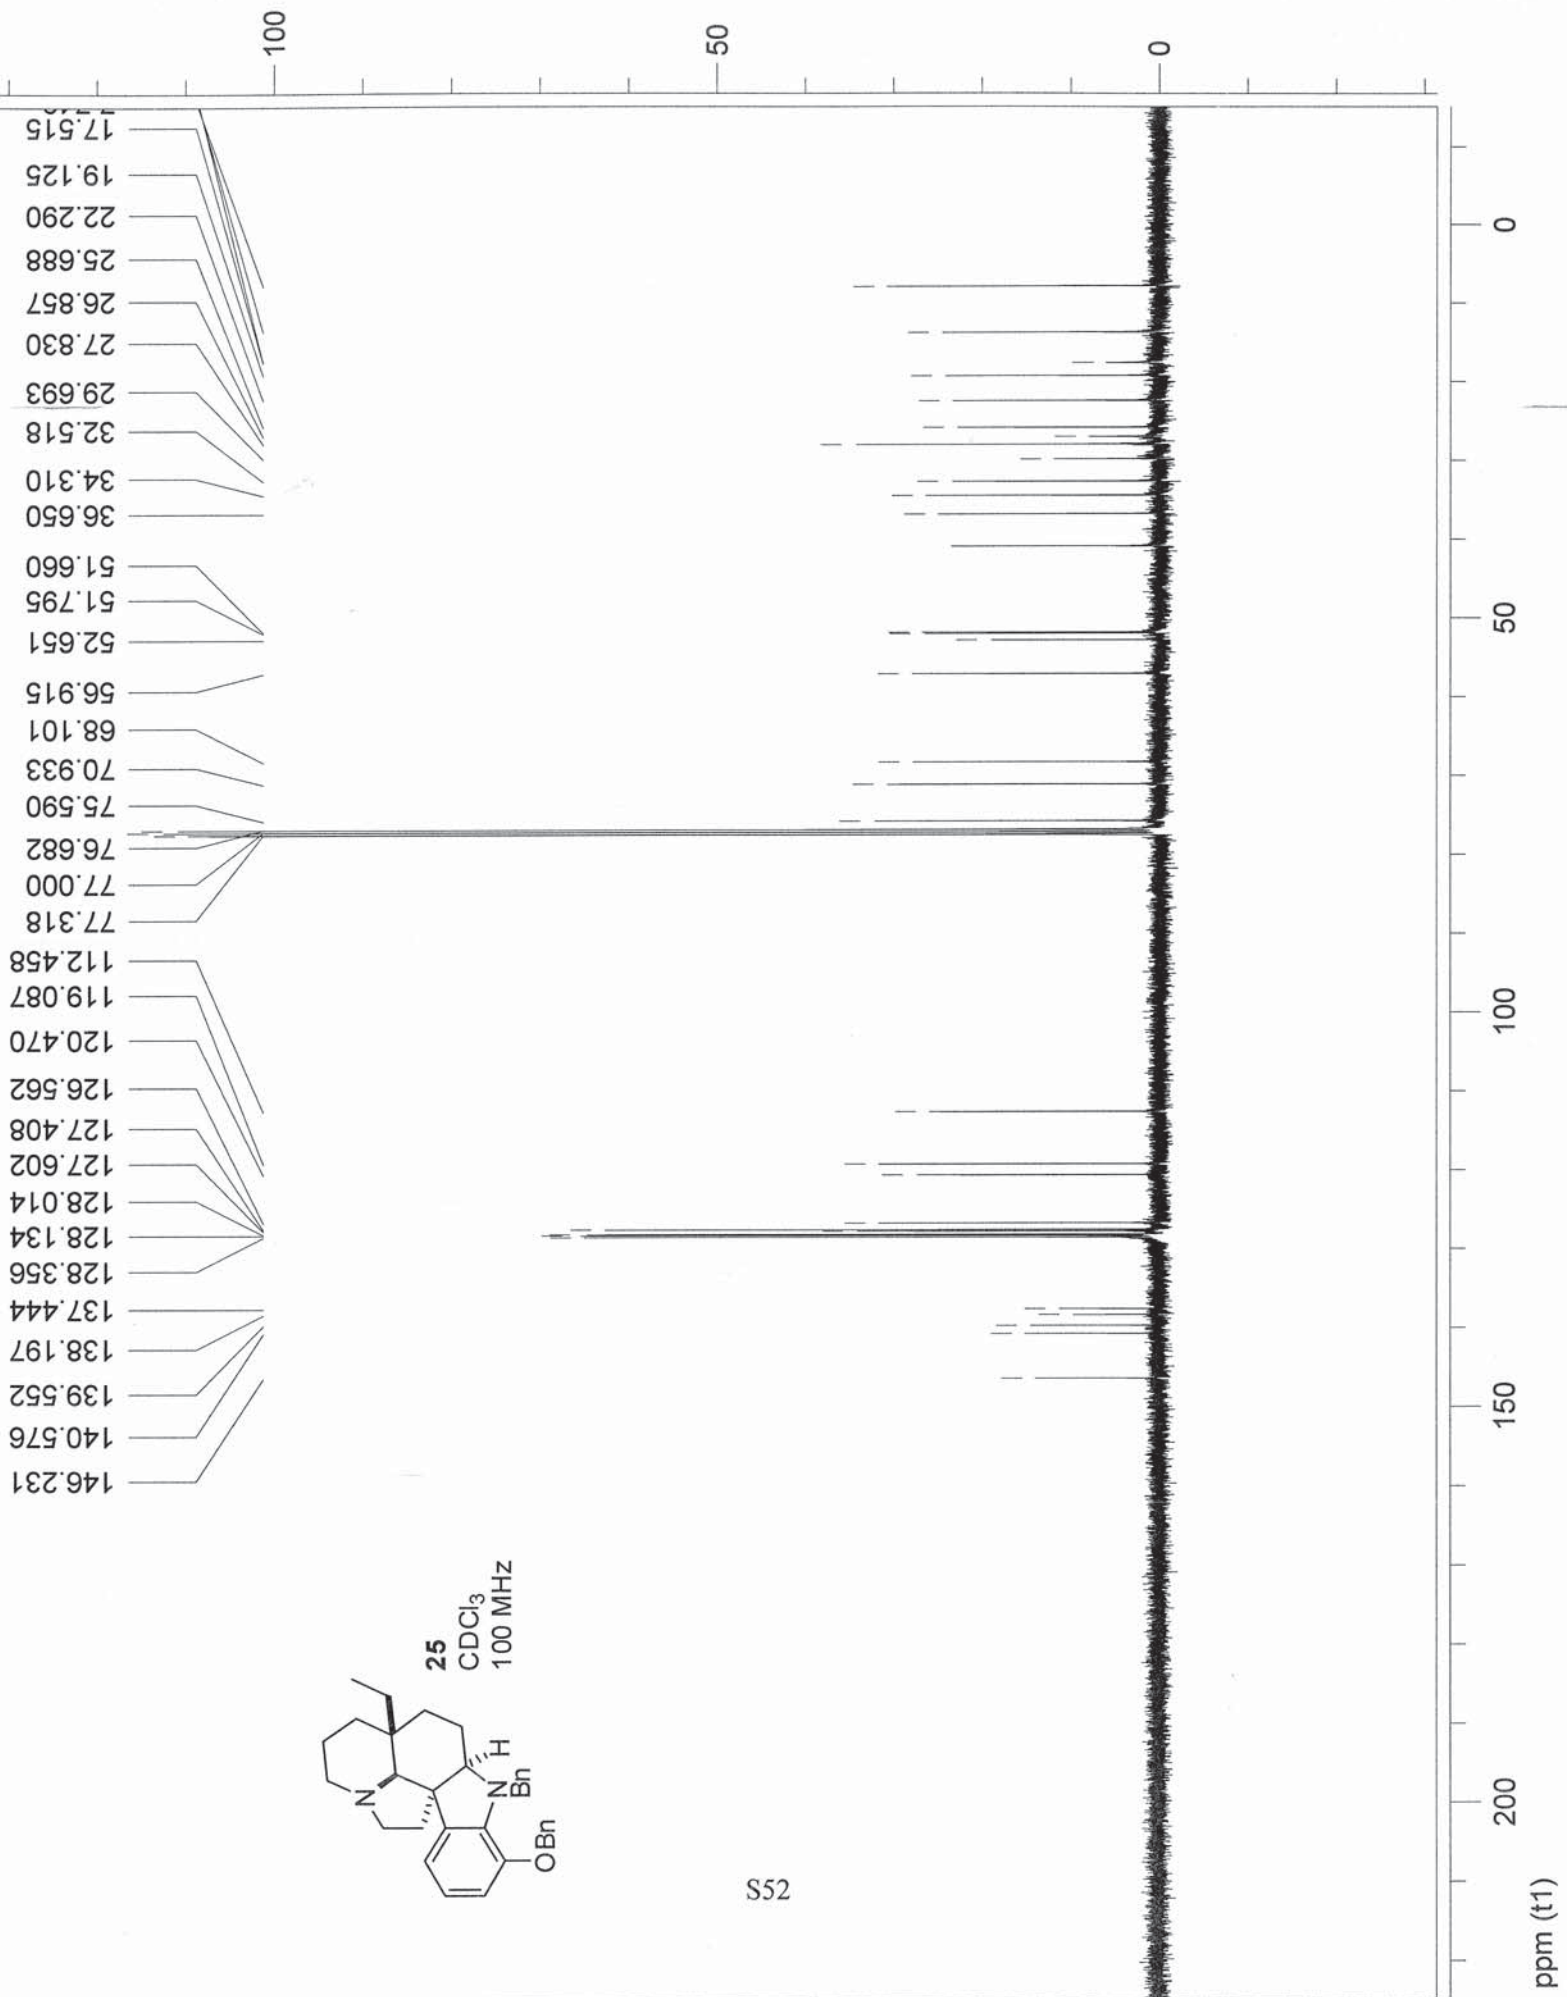



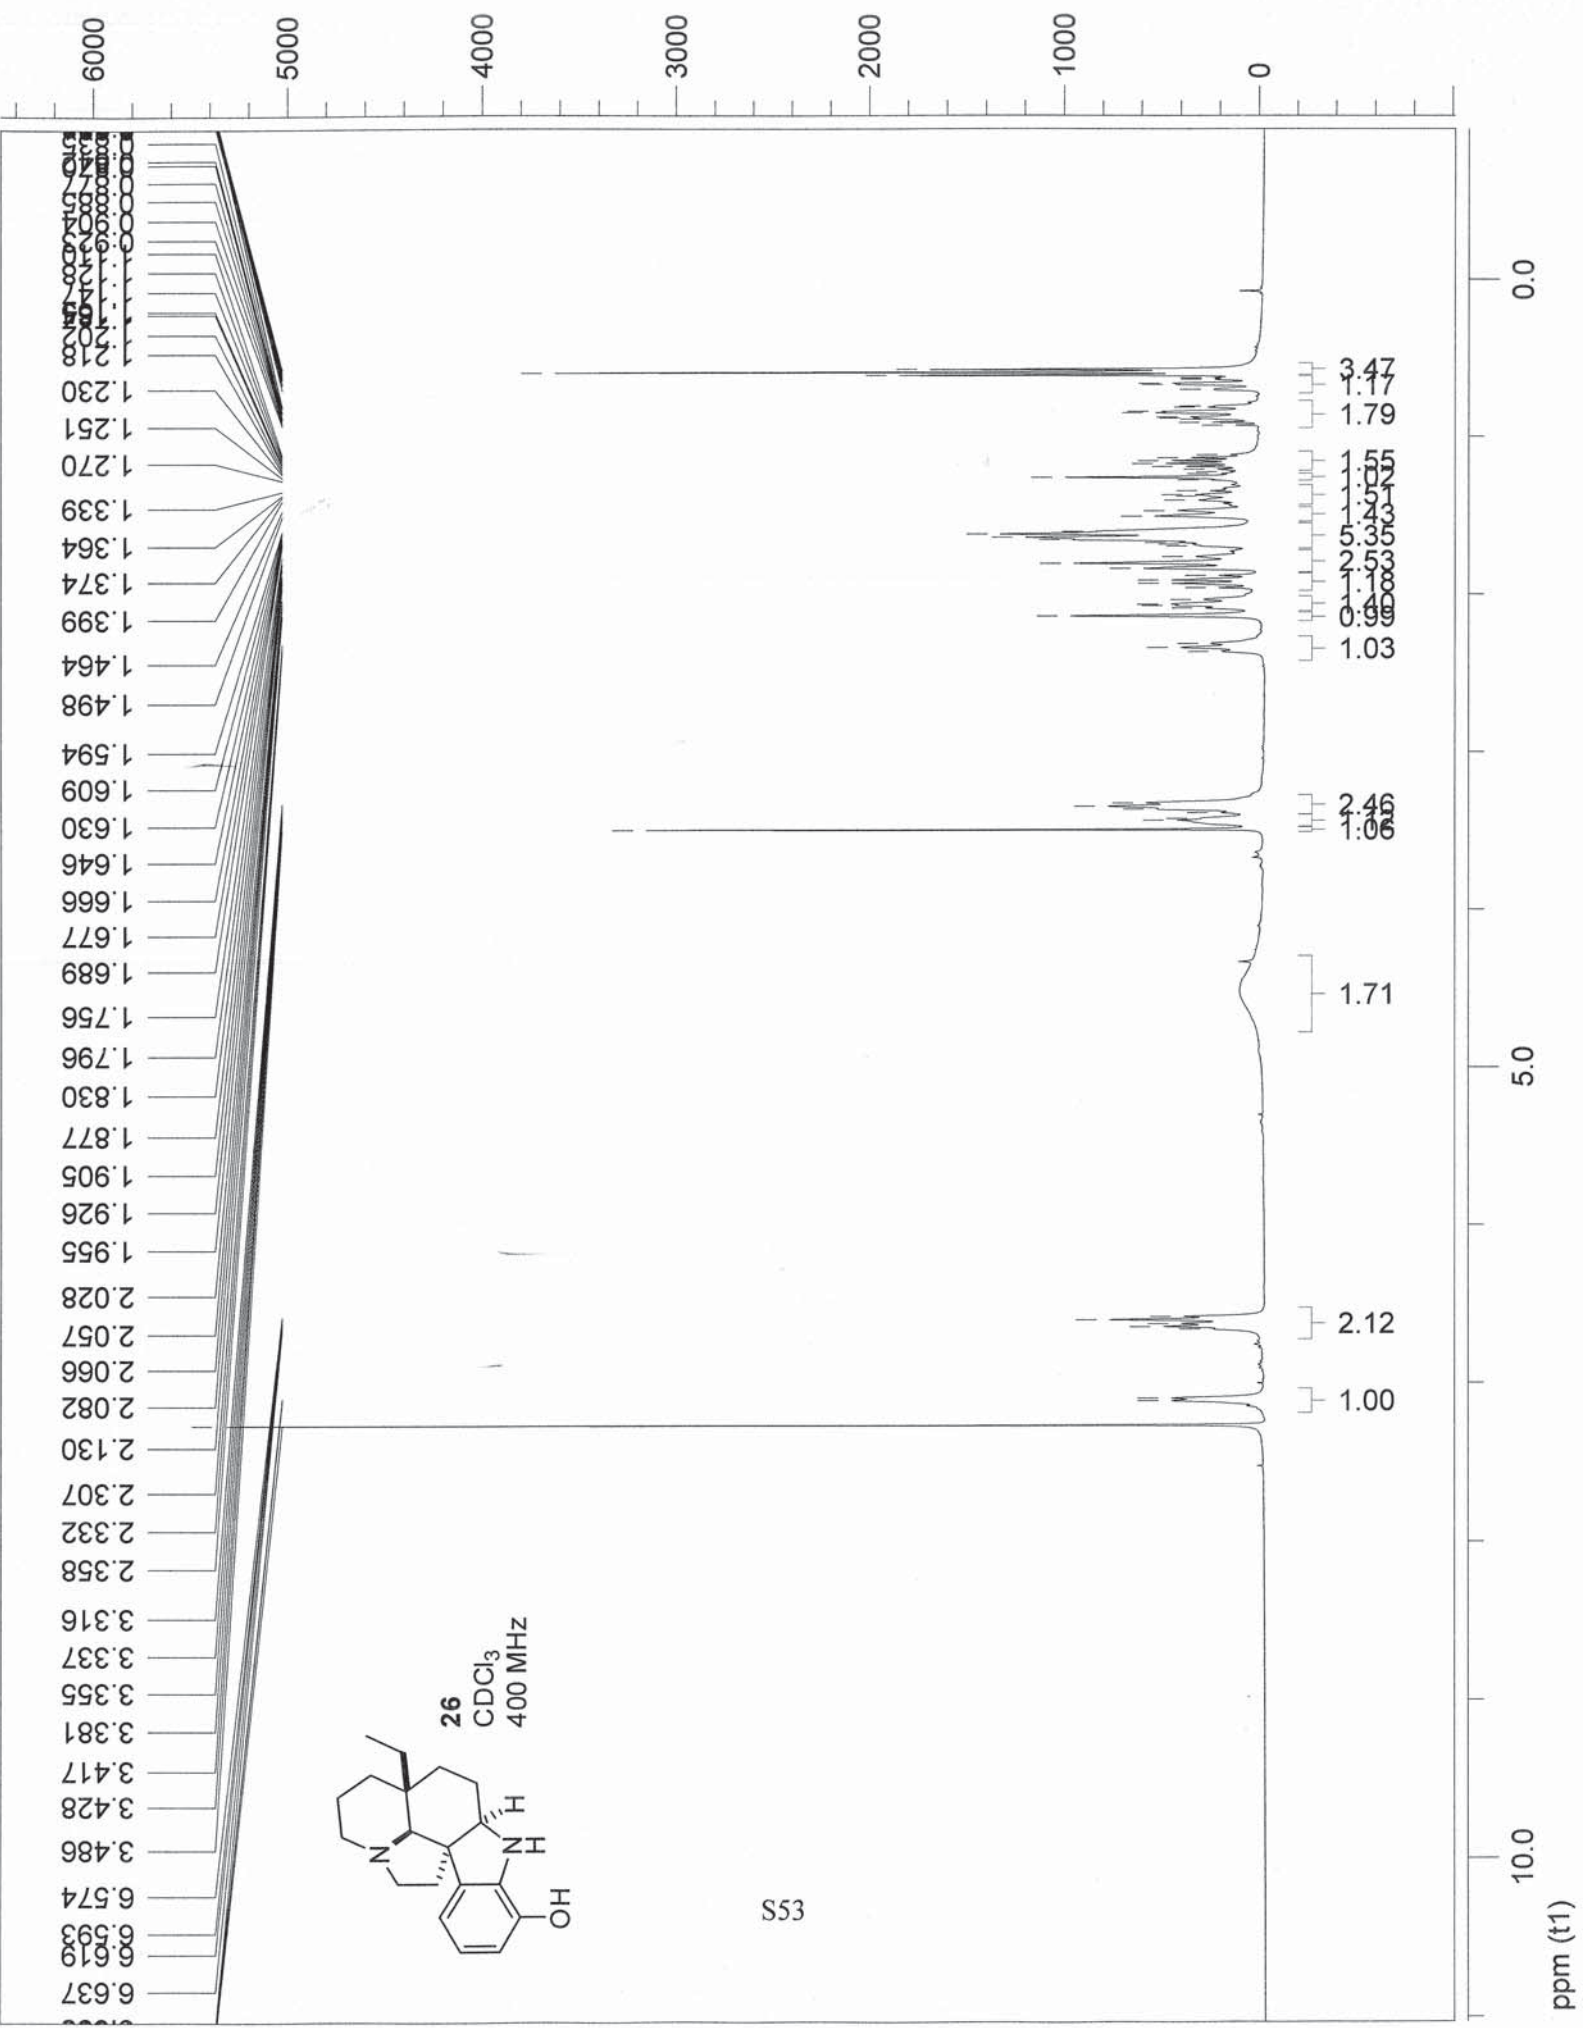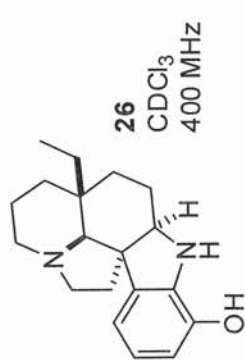

S53





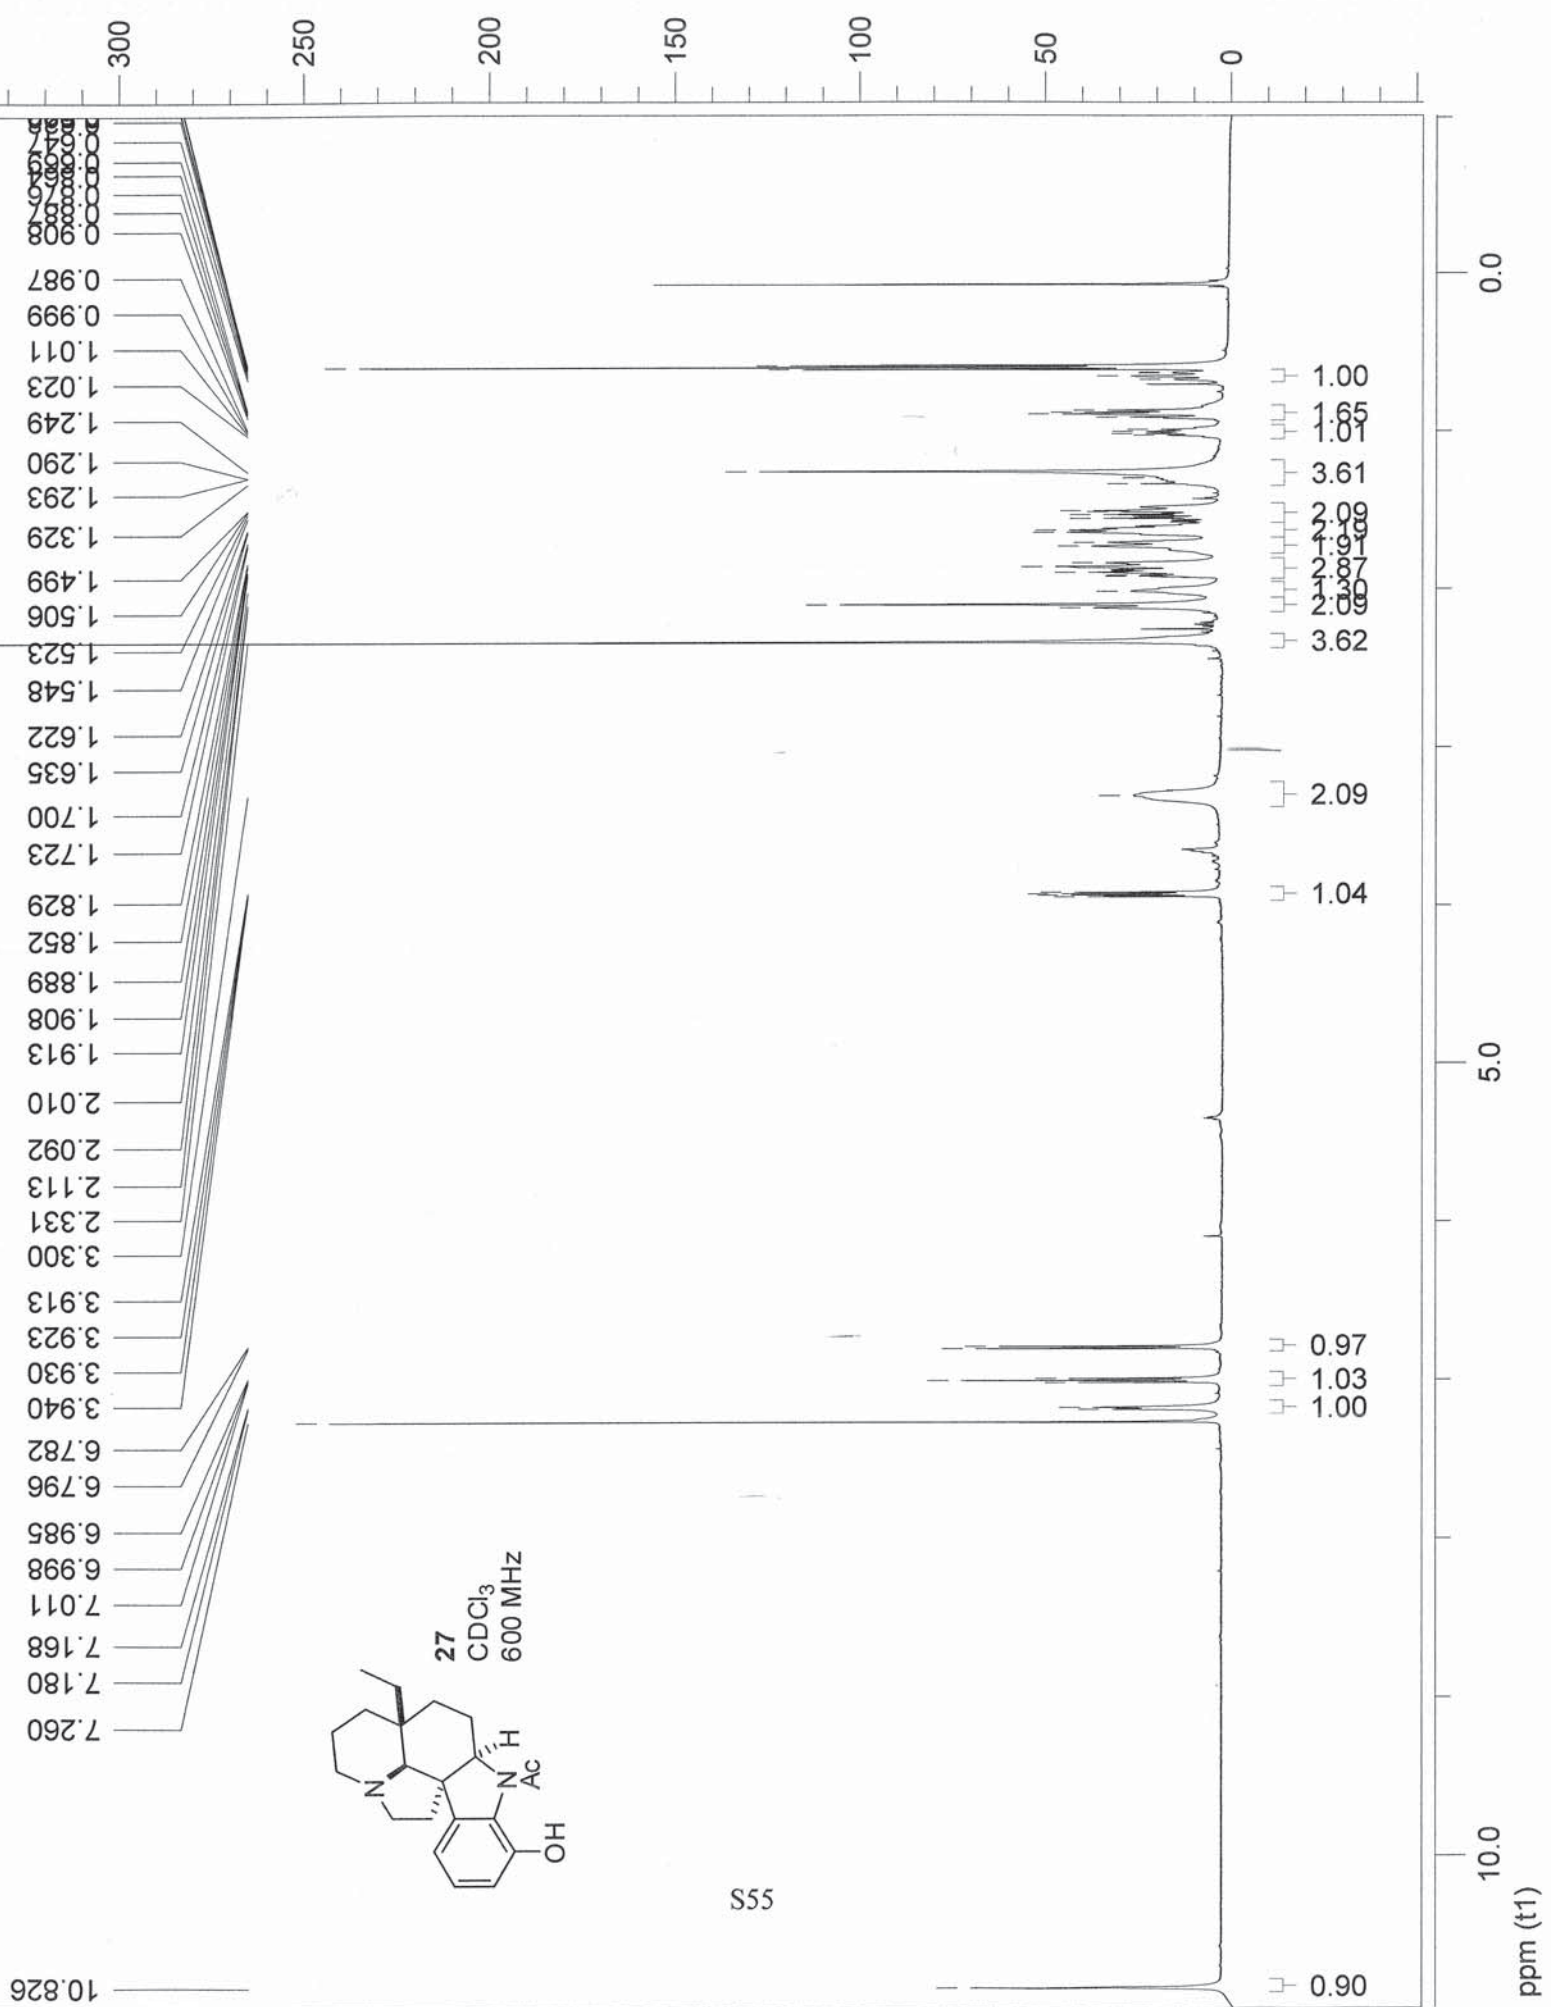

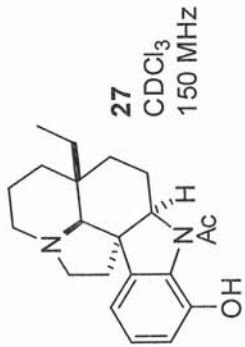

75.440  
 69.020  
 56.689  
 51.426  
 51.348  
 39.602  
 36.621  
 34.053  
 32.427  
 26.357  
 22.821  
 21.957  
 19.277  
 7.740

168.213  
 147.007  
 140.541  
 127.286  
 126.337  
 117.891  
 117.213

955

ppm (t1)

200

150

100

50

0

0

1000

2000

3000

4000

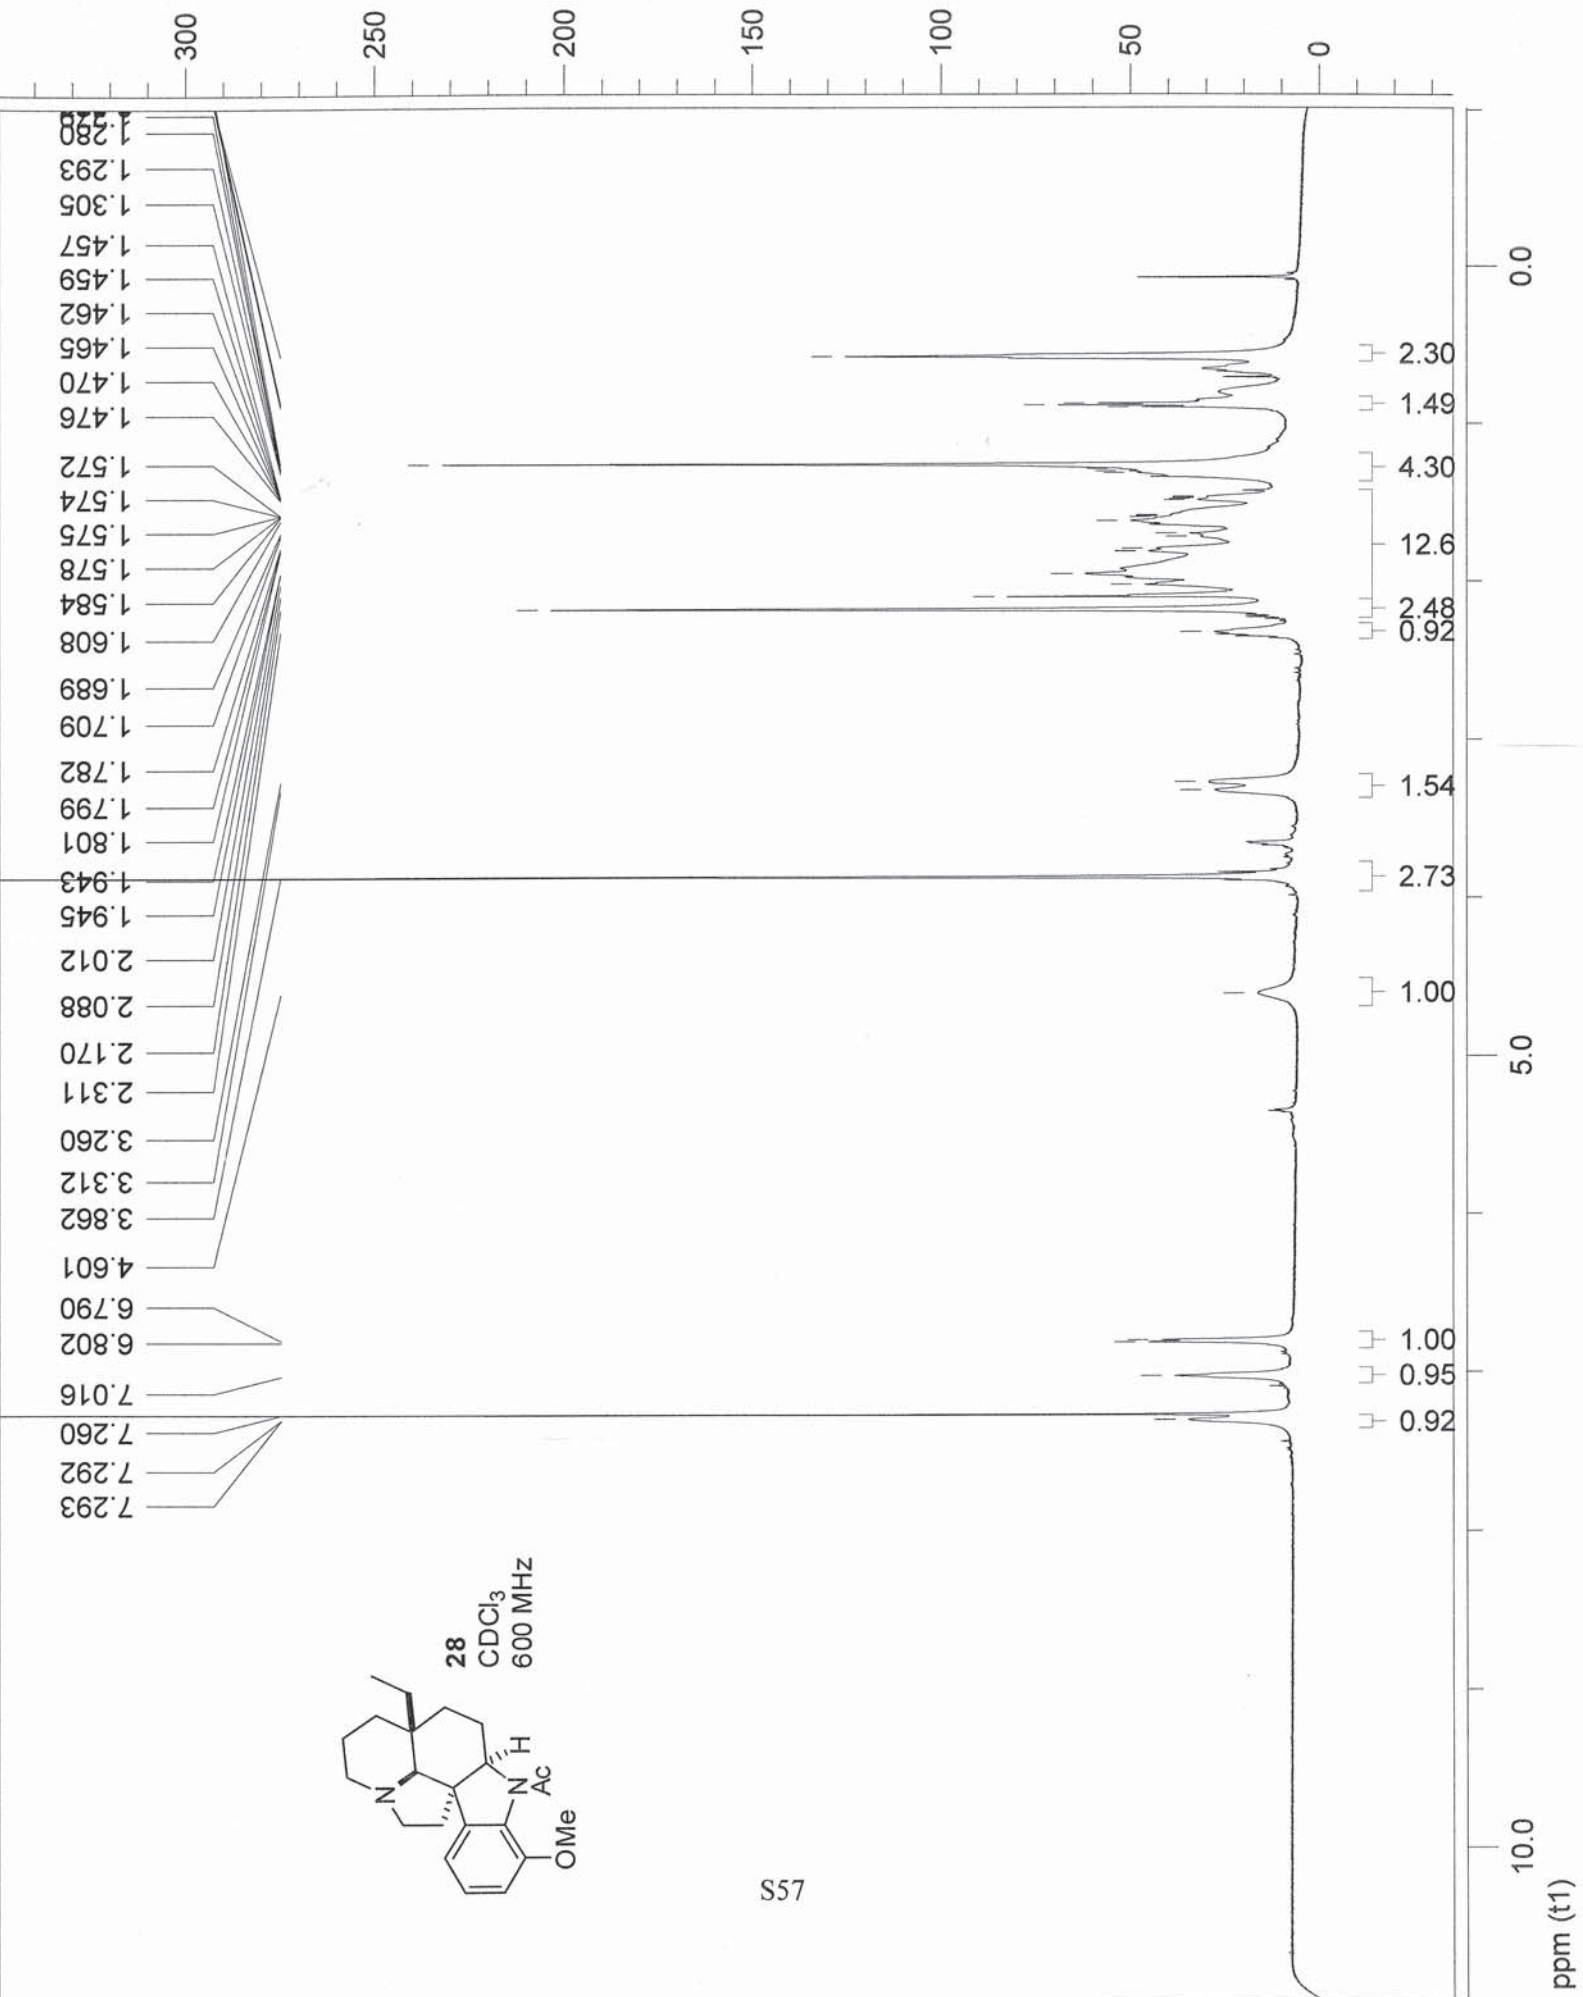

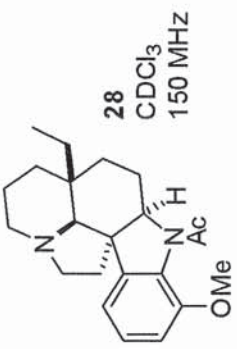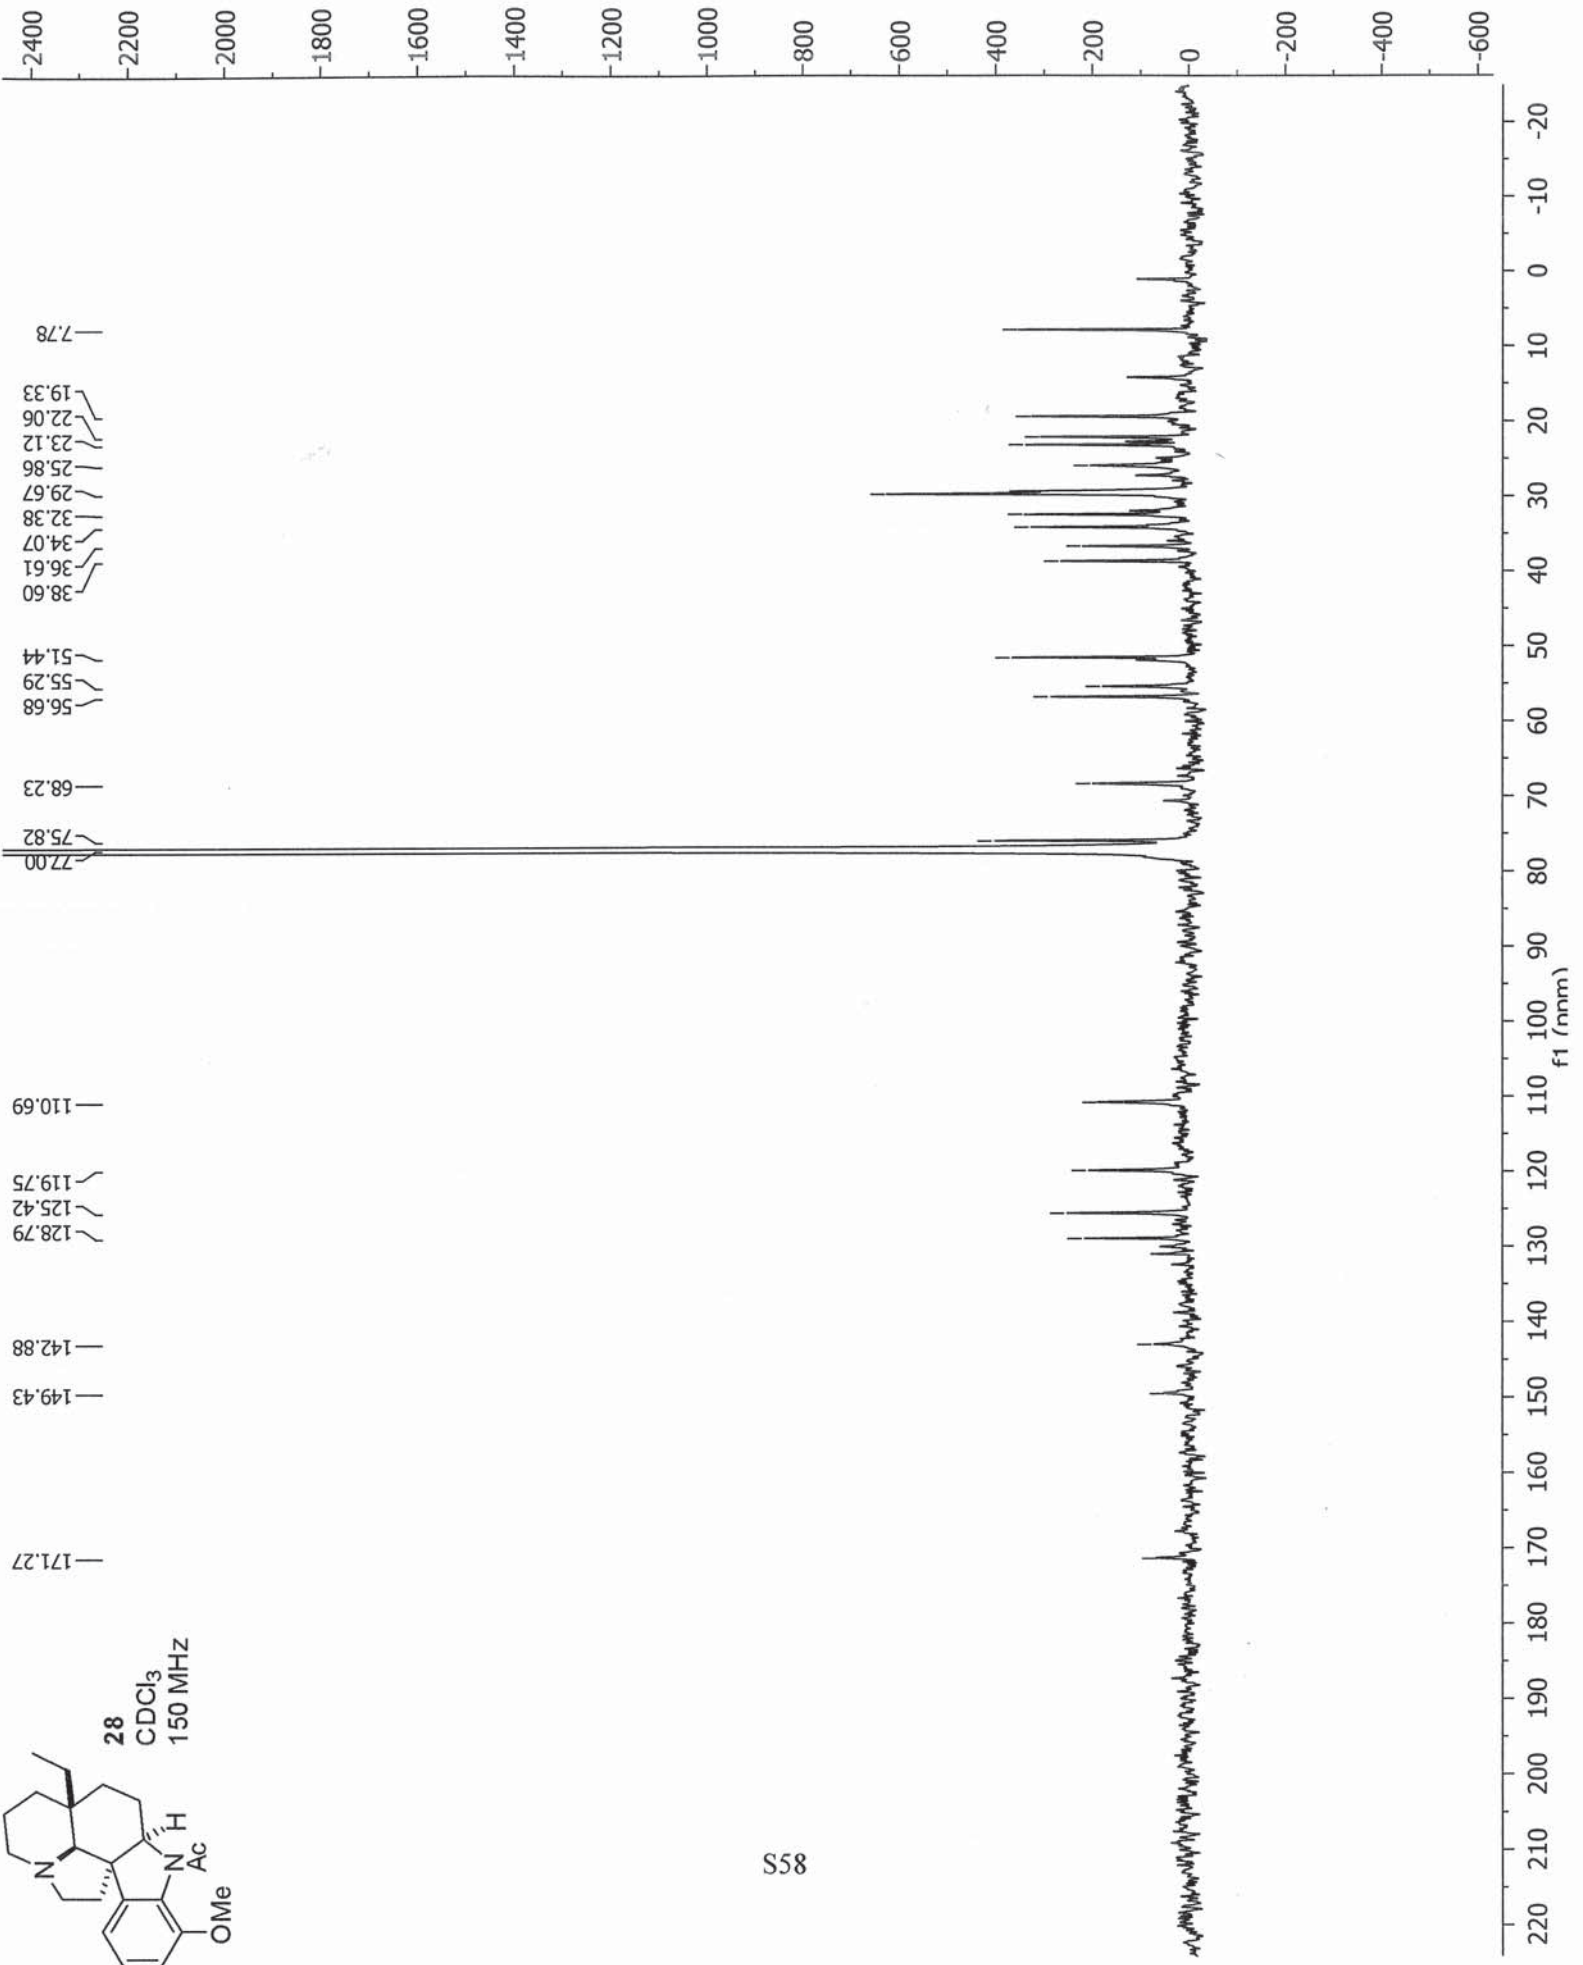





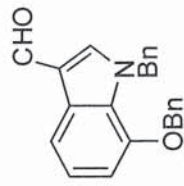

31  
CDCl<sub>3</sub>  
100 MHz

- 184.606
- 146.507
- 139.321
- 137.479
- 136.218
- 128.710
- 128.529
- 128.119
- 127.870
- 127.773
- 127.605
- 126.955
- 126.533
- 123.743
- 118.396
- 114.629
- 106.177
- 77.000
- 70.434
- 53.468

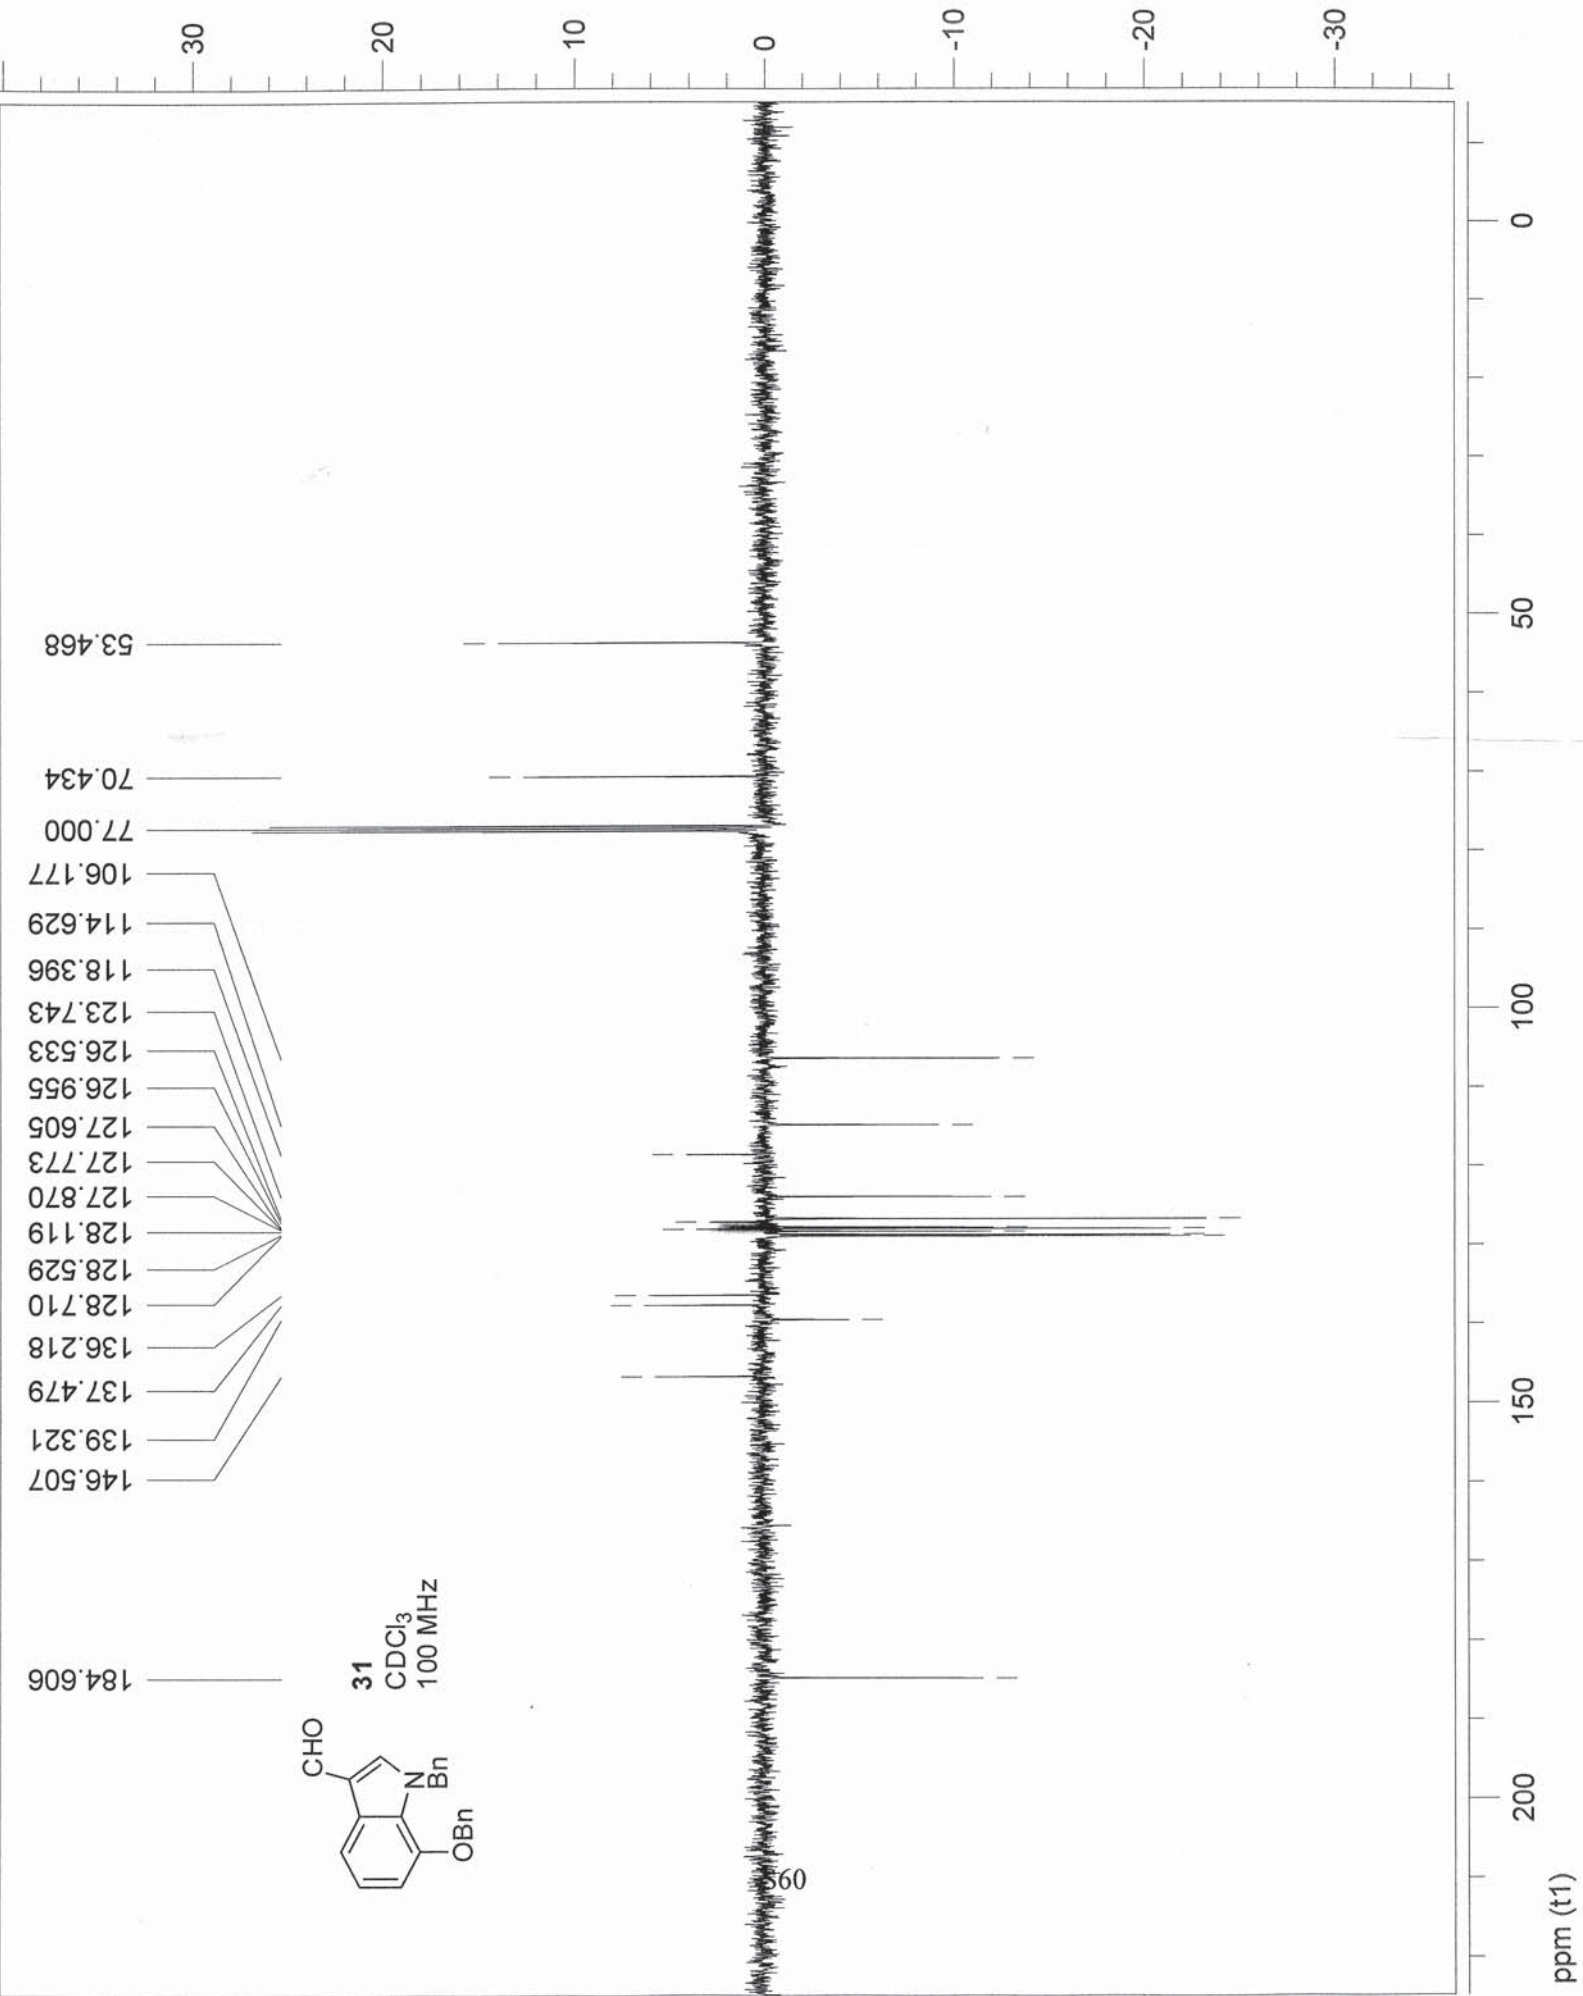

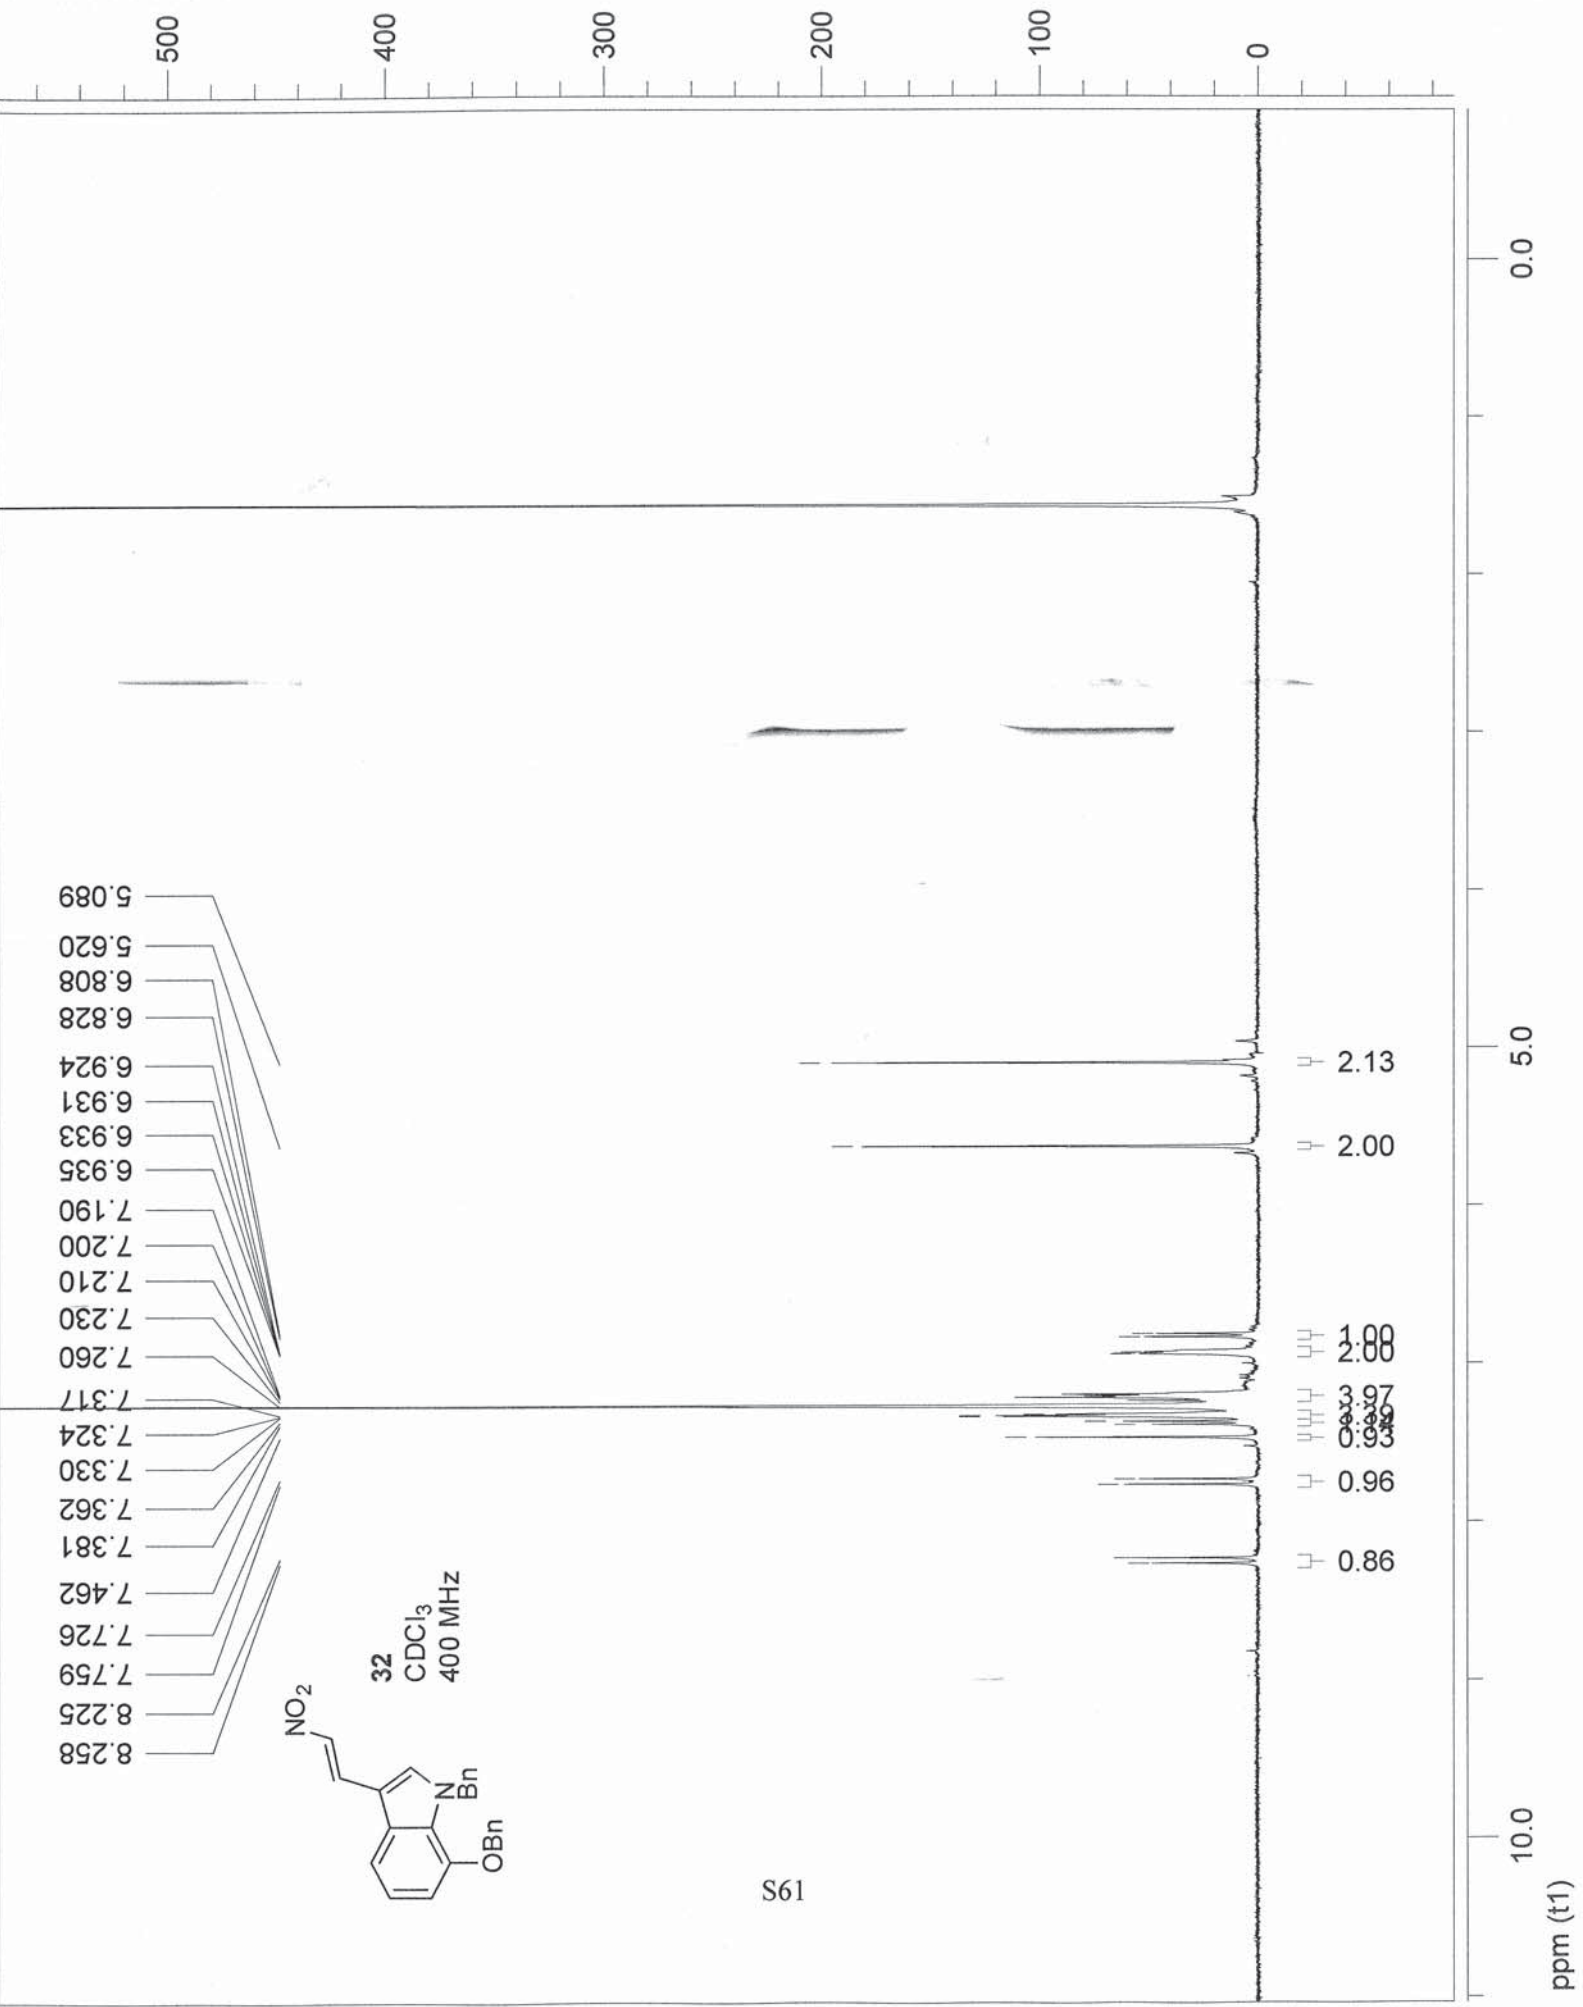

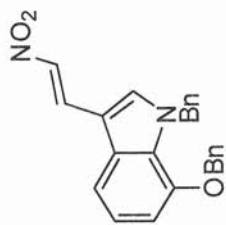

32  
CDCl<sub>3</sub>  
100 MHz

- 147.301
- 137.714
- 136.945
- 136.277
- 133.496
- 132.471
- 128.976
- 128.811
- 128.811
- 128.441
- 128.416
- 128.019
- 127.880
- 127.688
- 126.684
- 123.604
- 113.474
- 108.811
- 106.336

70.754  
53.637

50

0

0

50

100

150

200

ppm (t1)



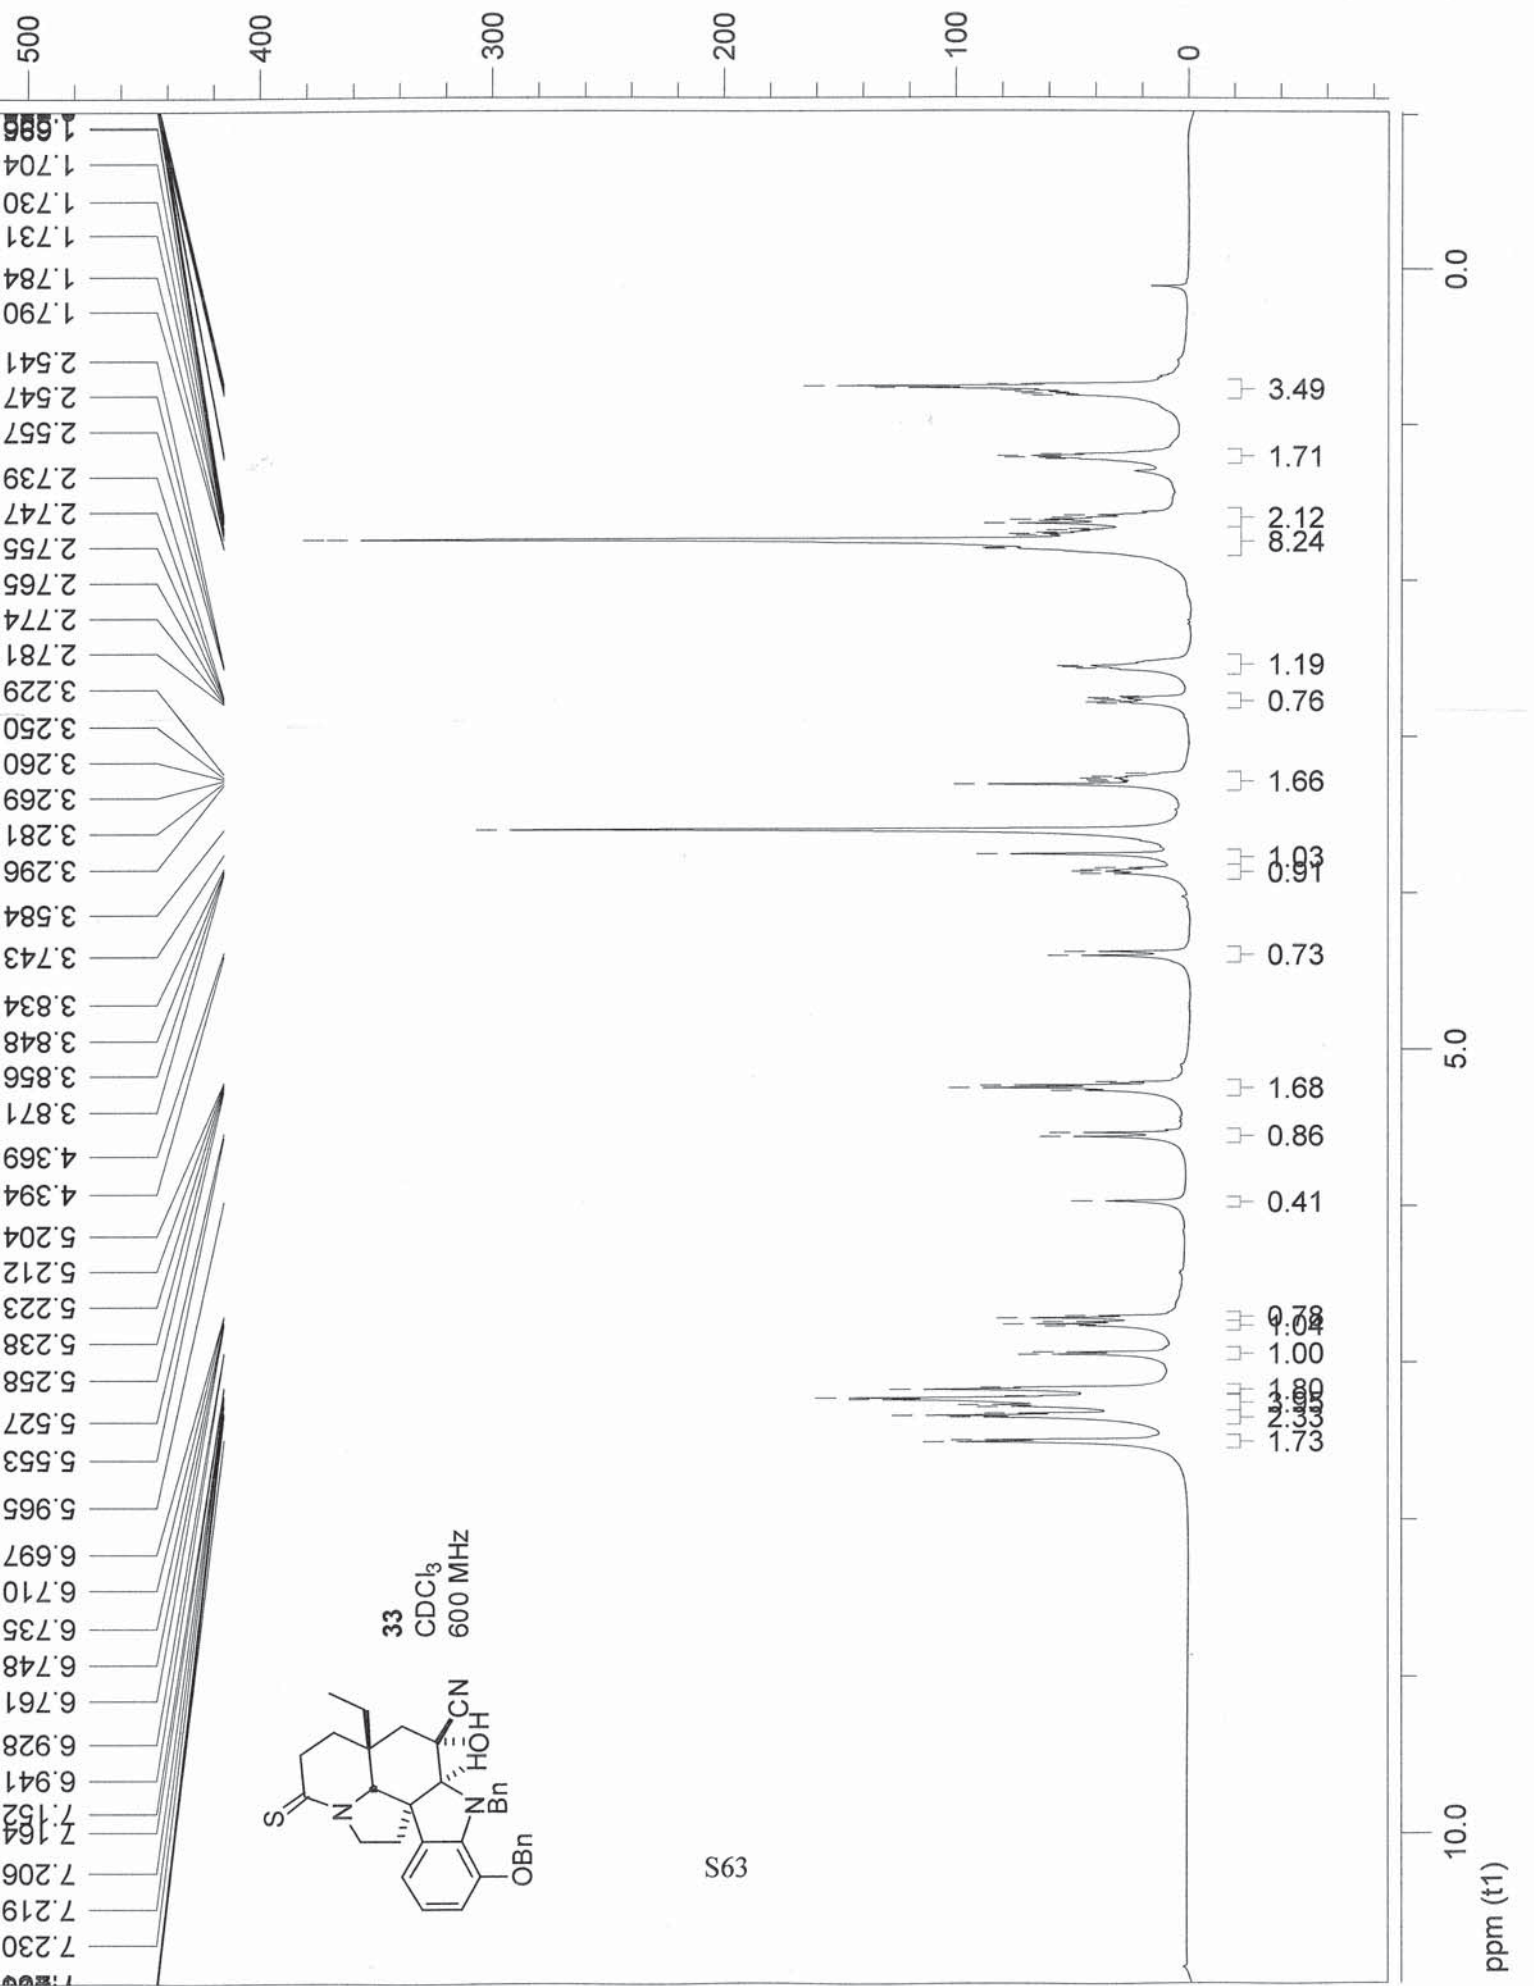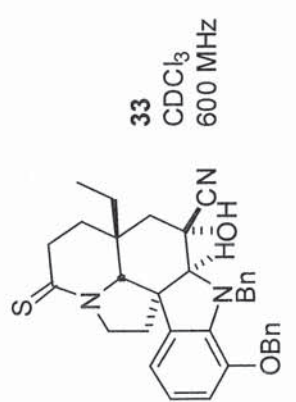

S93

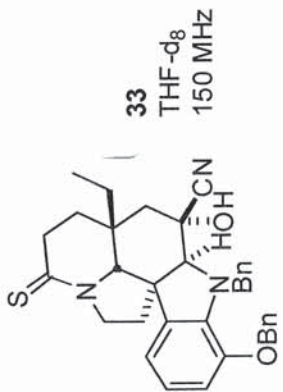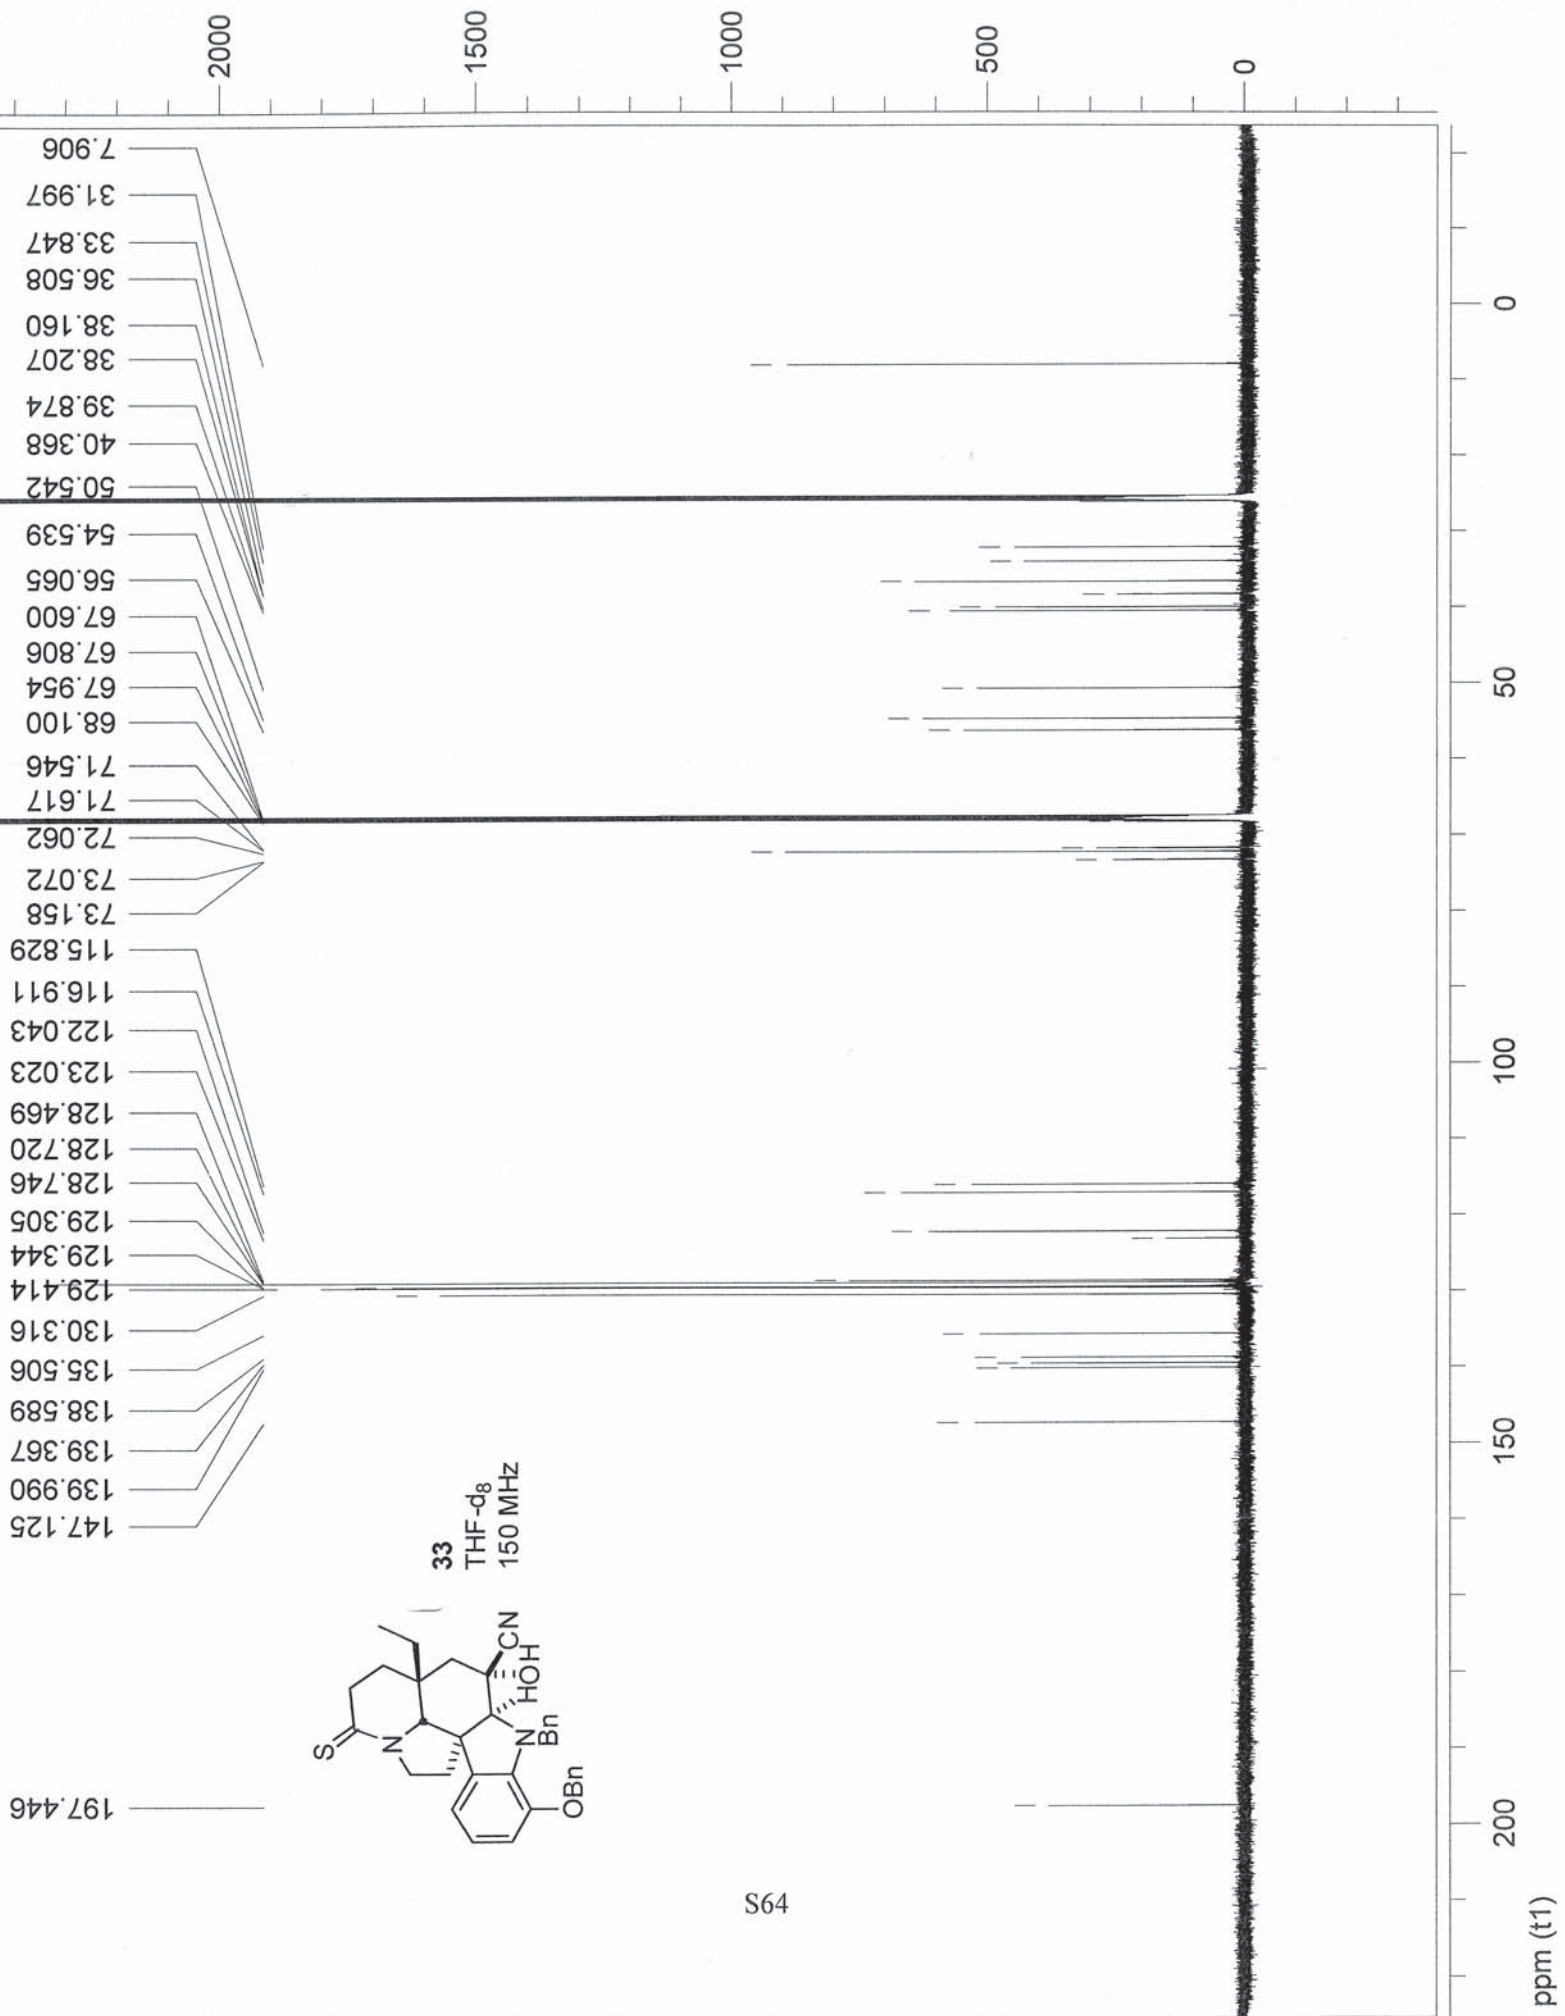

300

250

200

150

100

50

0

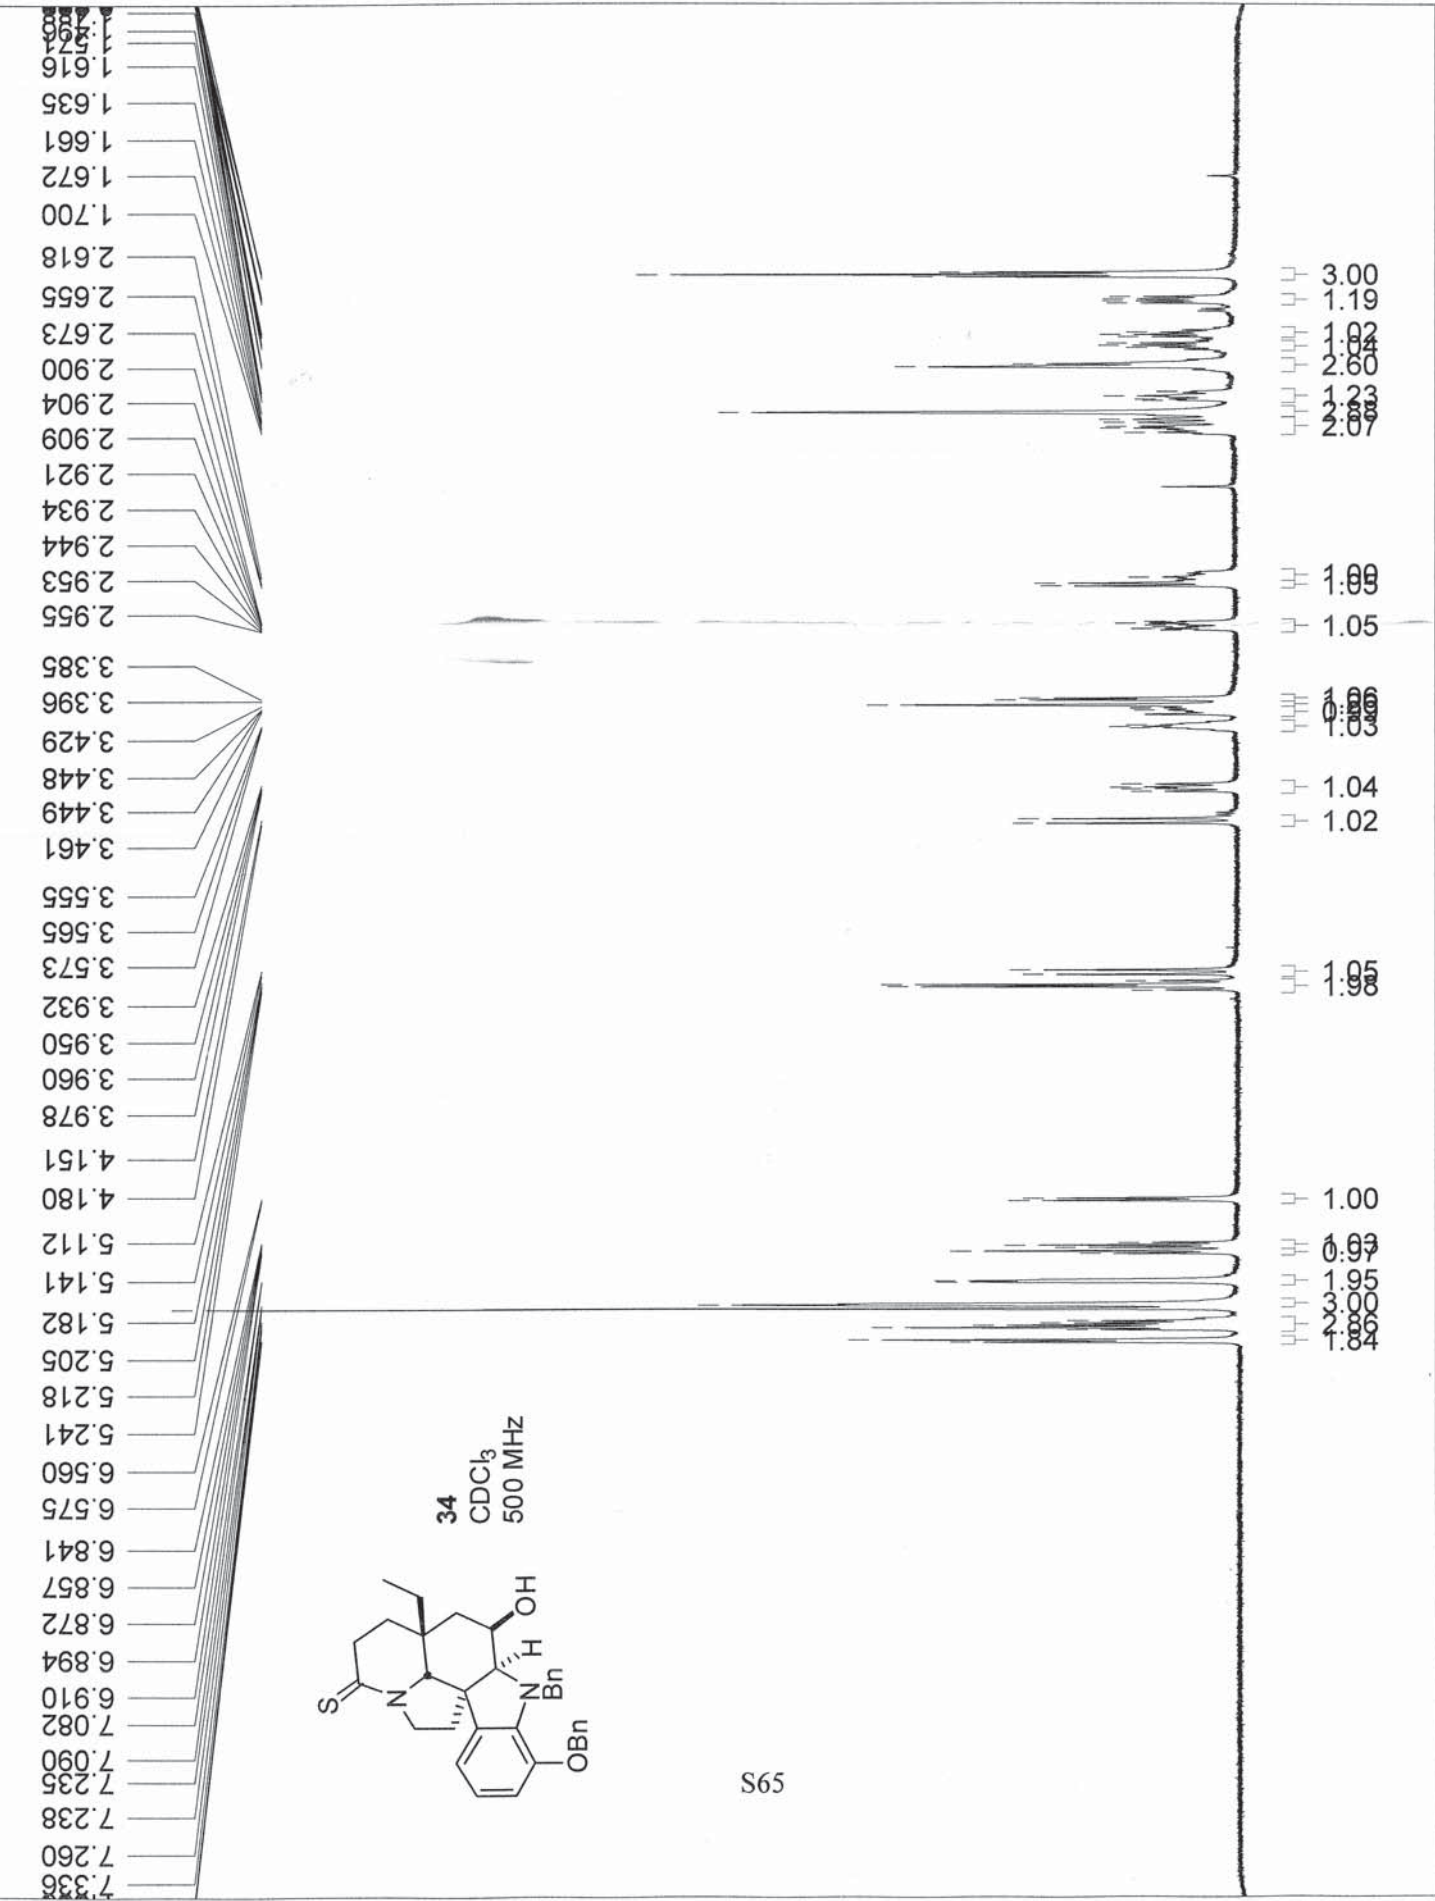

0.0

5.0

10.0

ppm (tau)

S95

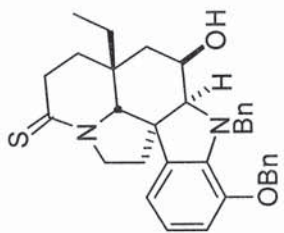

- 198.875
- 146.688
- 140.041
- 137.748
- 136.611
- 135.400
- 129.277
- 128.641
- 128.476
- 128.207
- 127.750
- 127.735
- 122.126
- 115.421
- 113.111
- 70.781
- 68.288
- 66.942
- 66.703
- 56.079
- 55.829
- 50.096
- 39.303
- 38.825
- 36.076
- 34.939
- 32.977
- 30.038
- 7.527

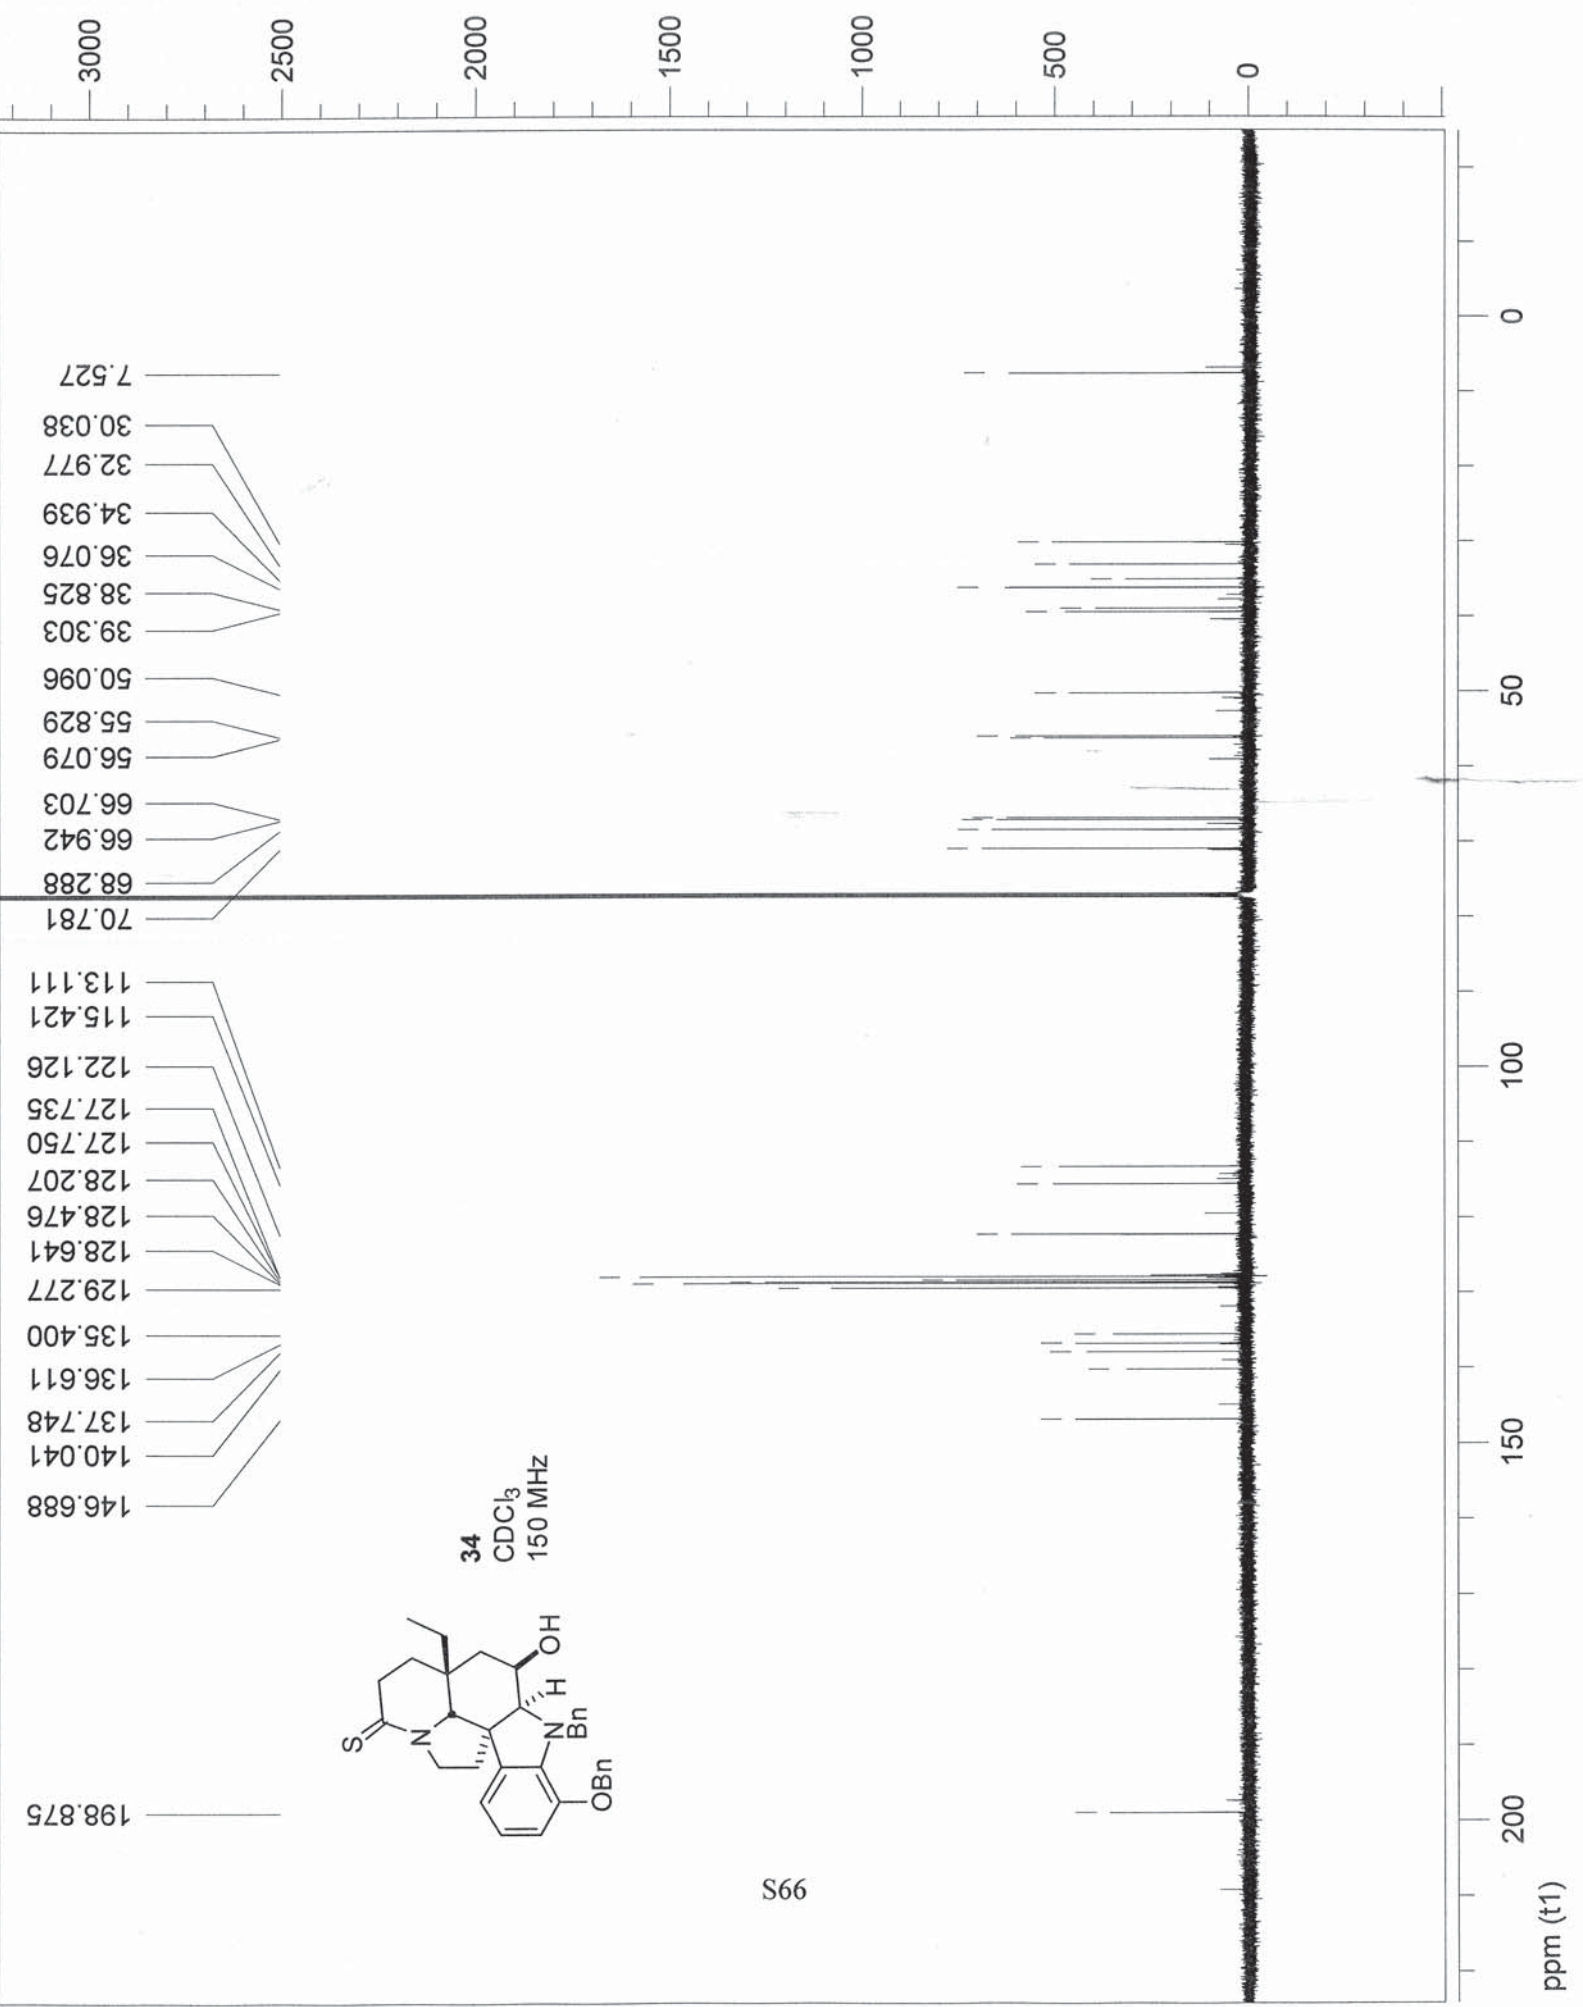



800 700 600 500 400 300 200 100 0 -100

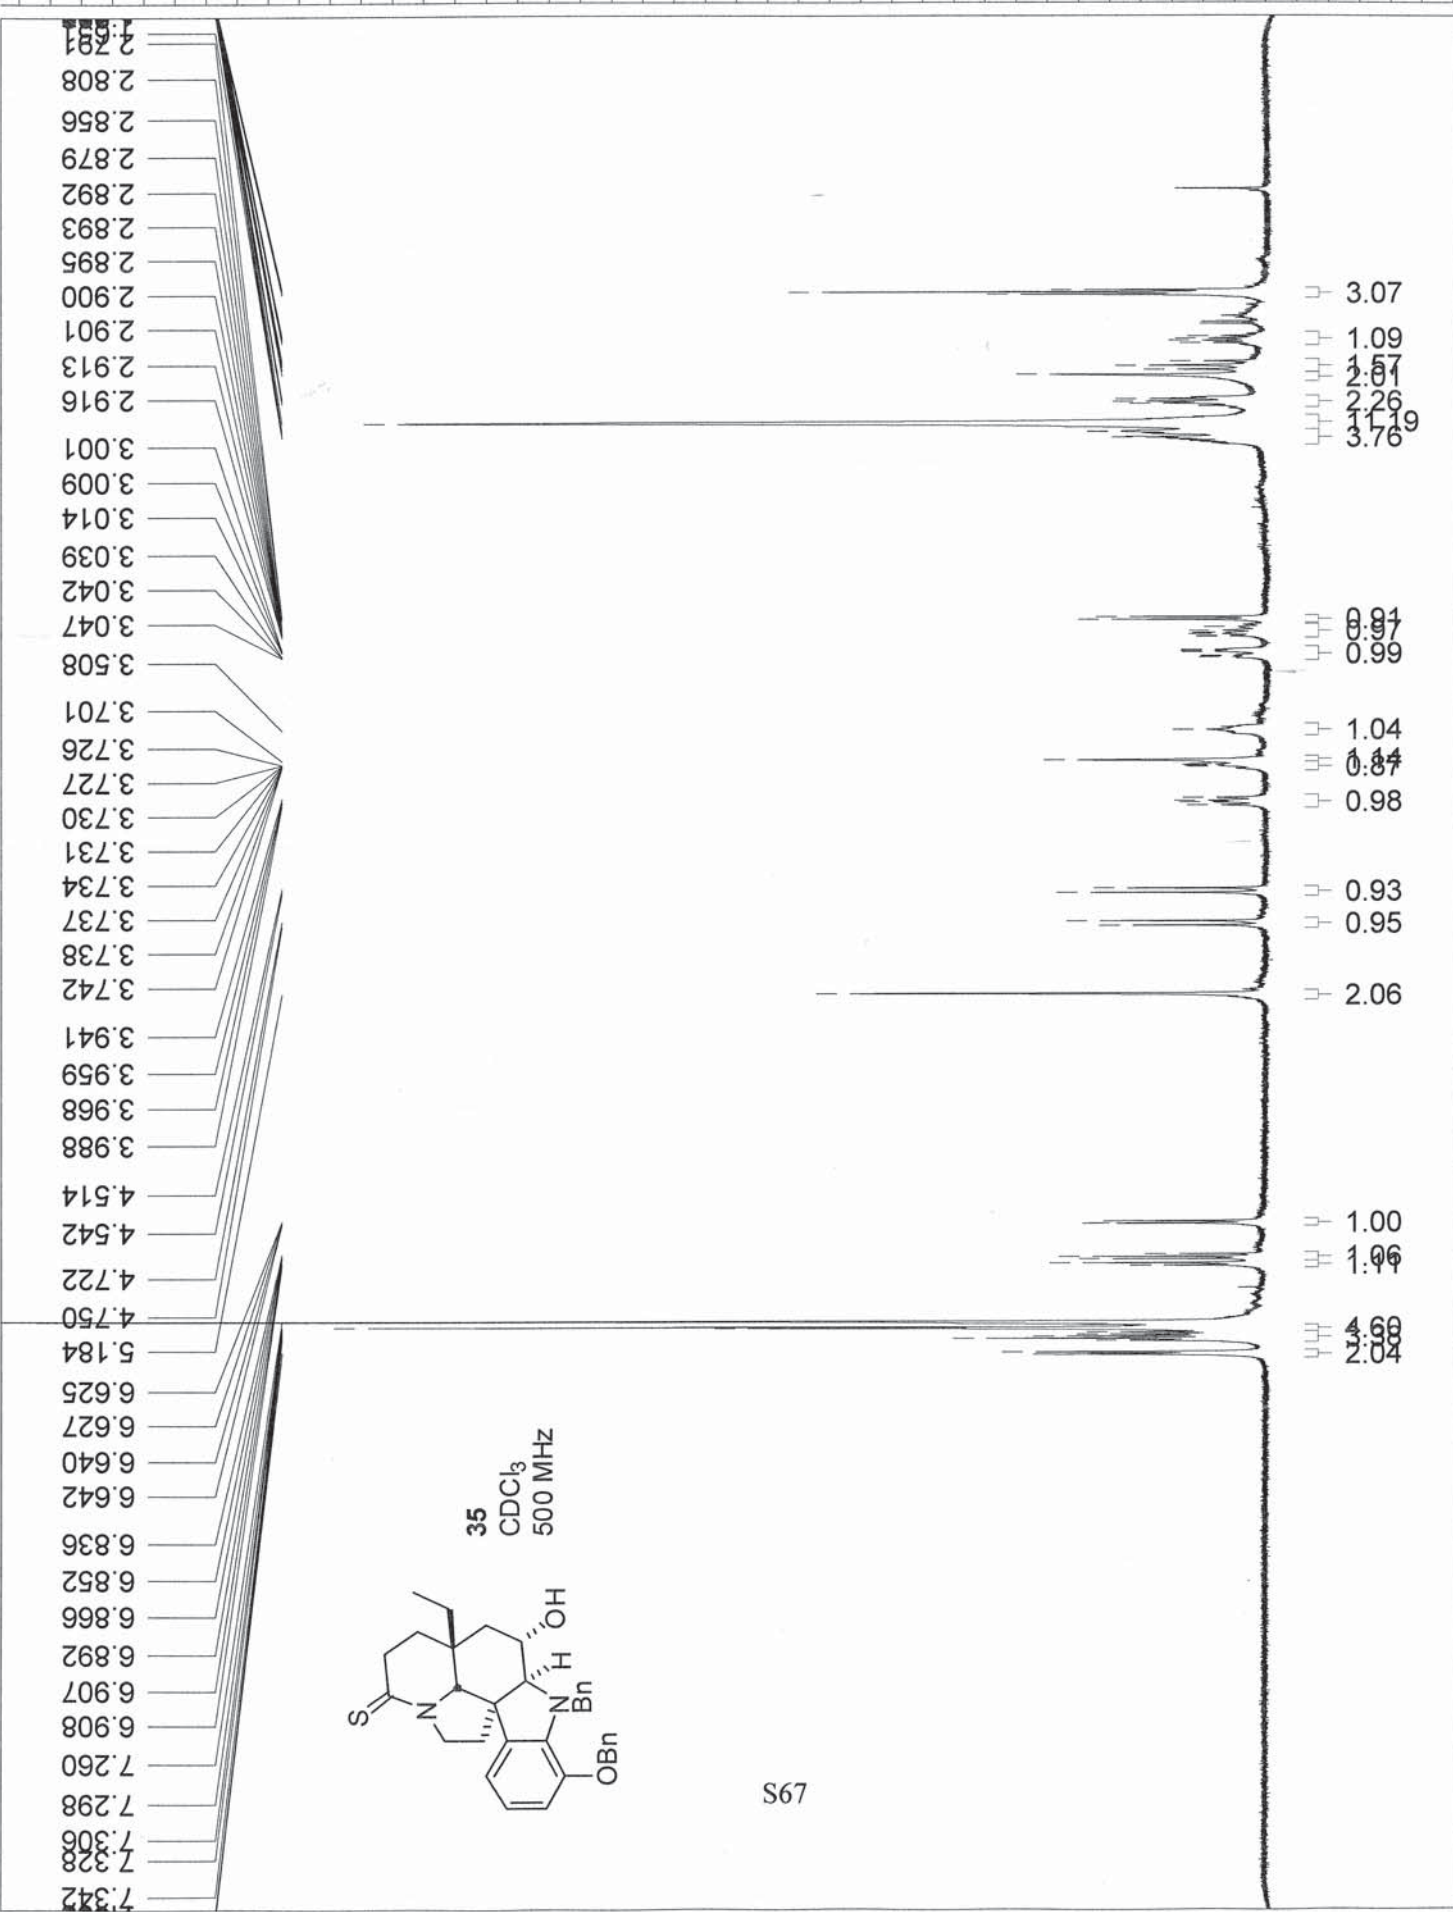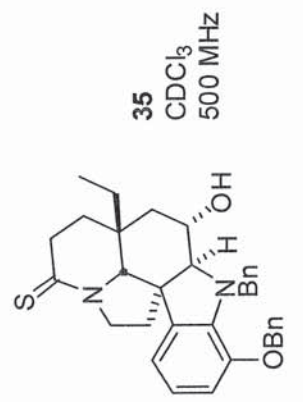

S67

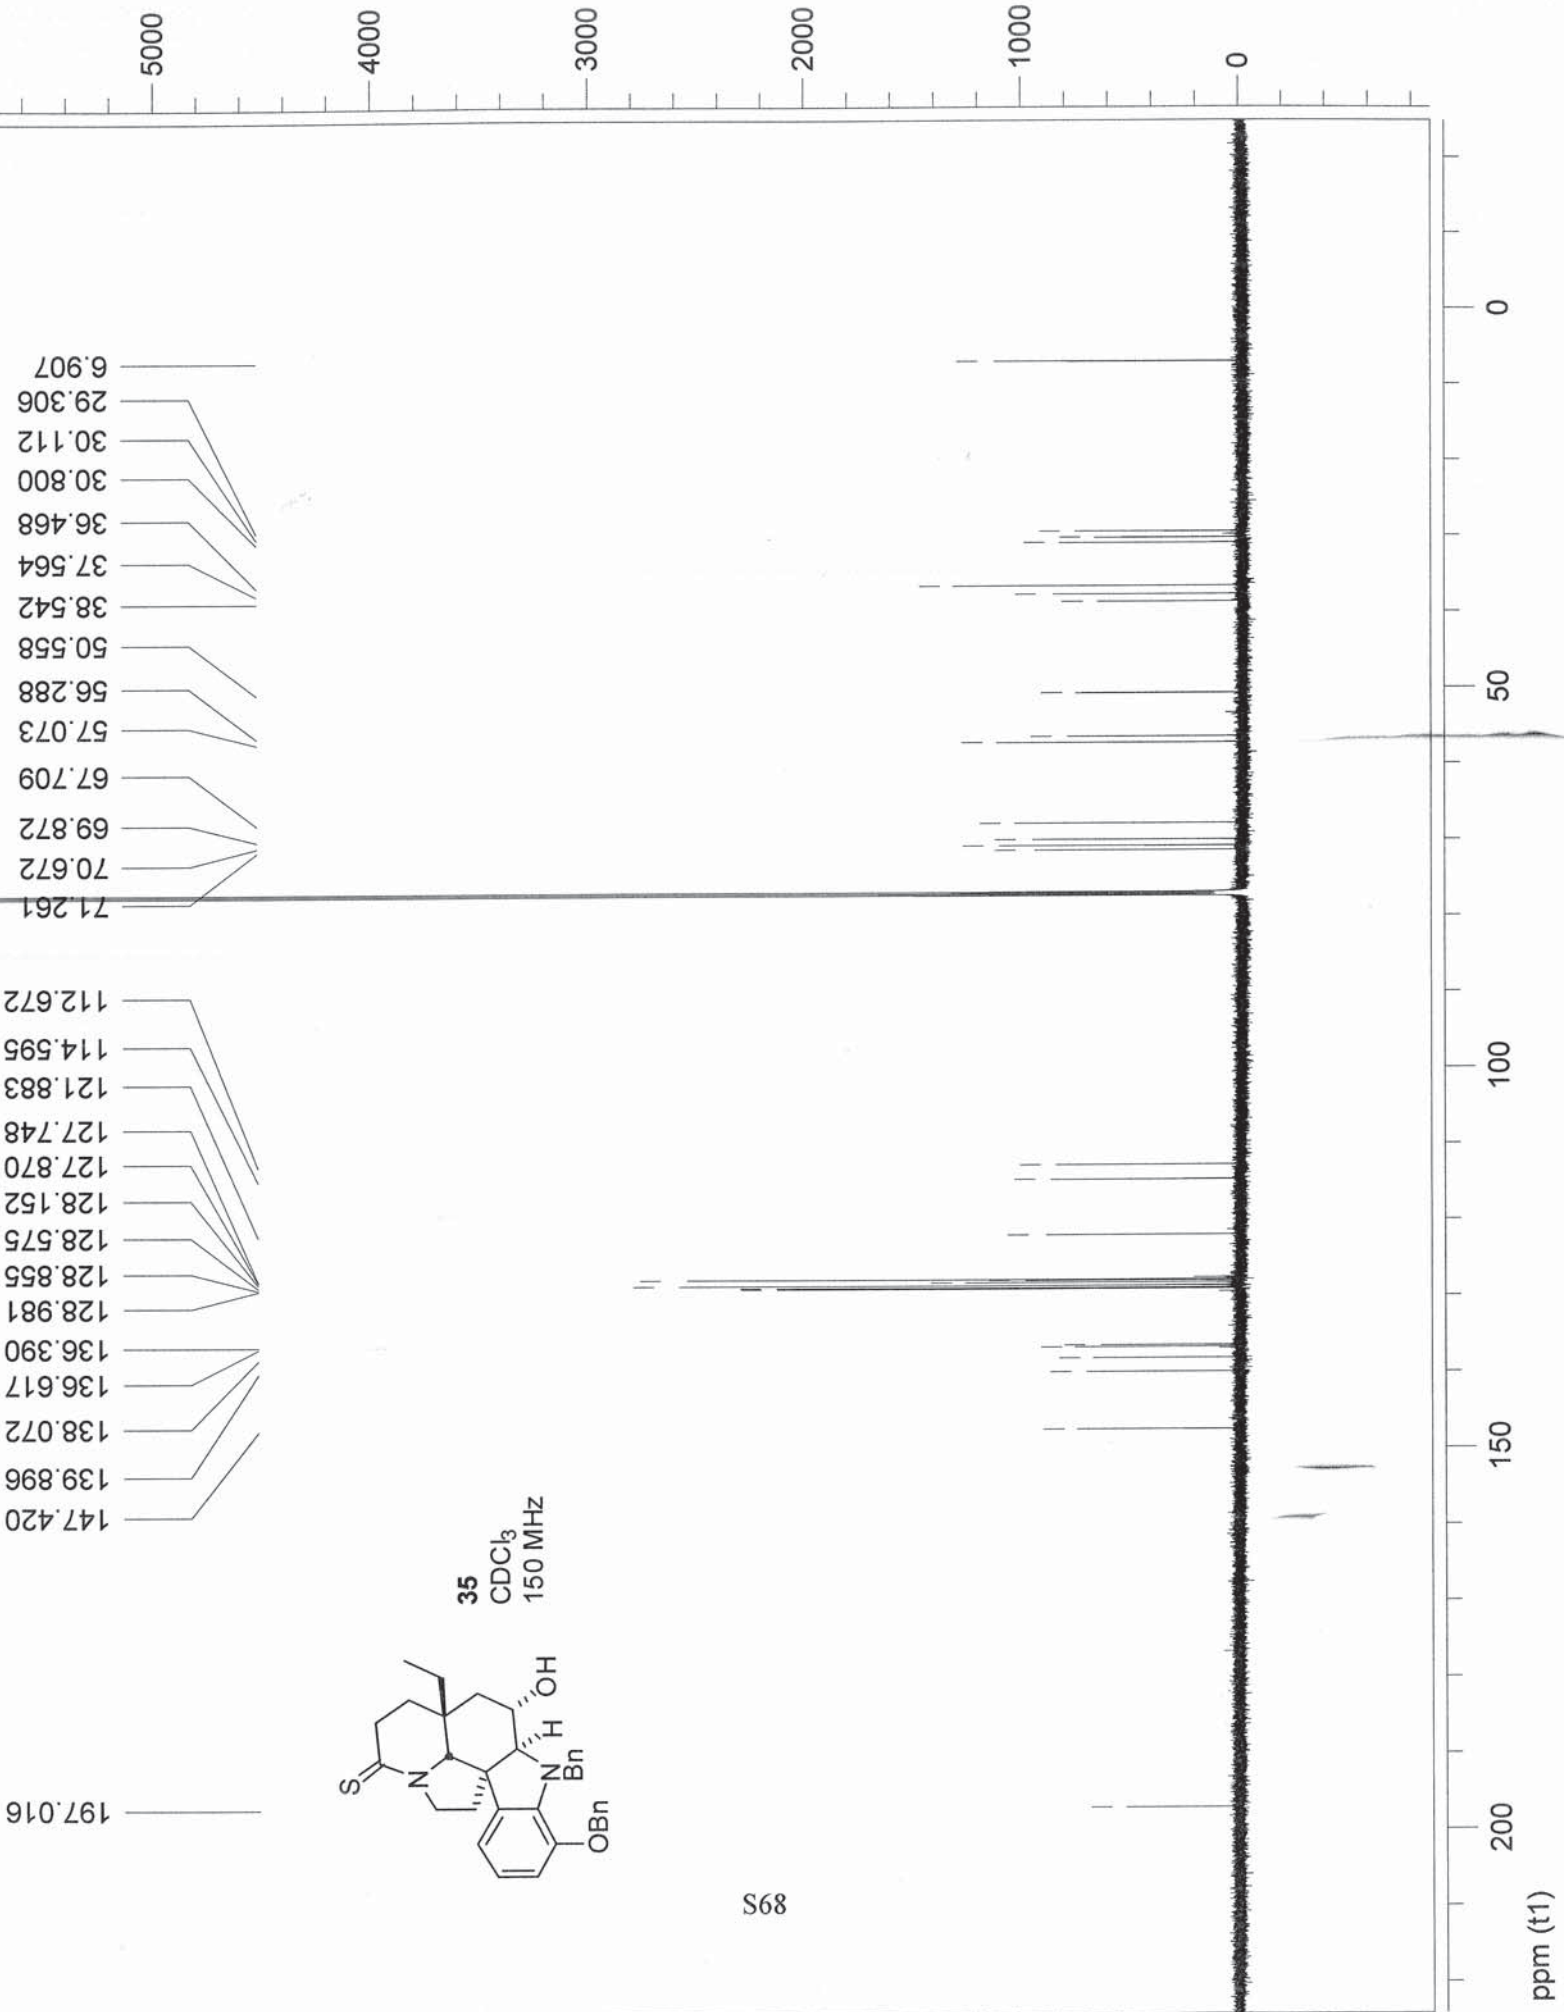

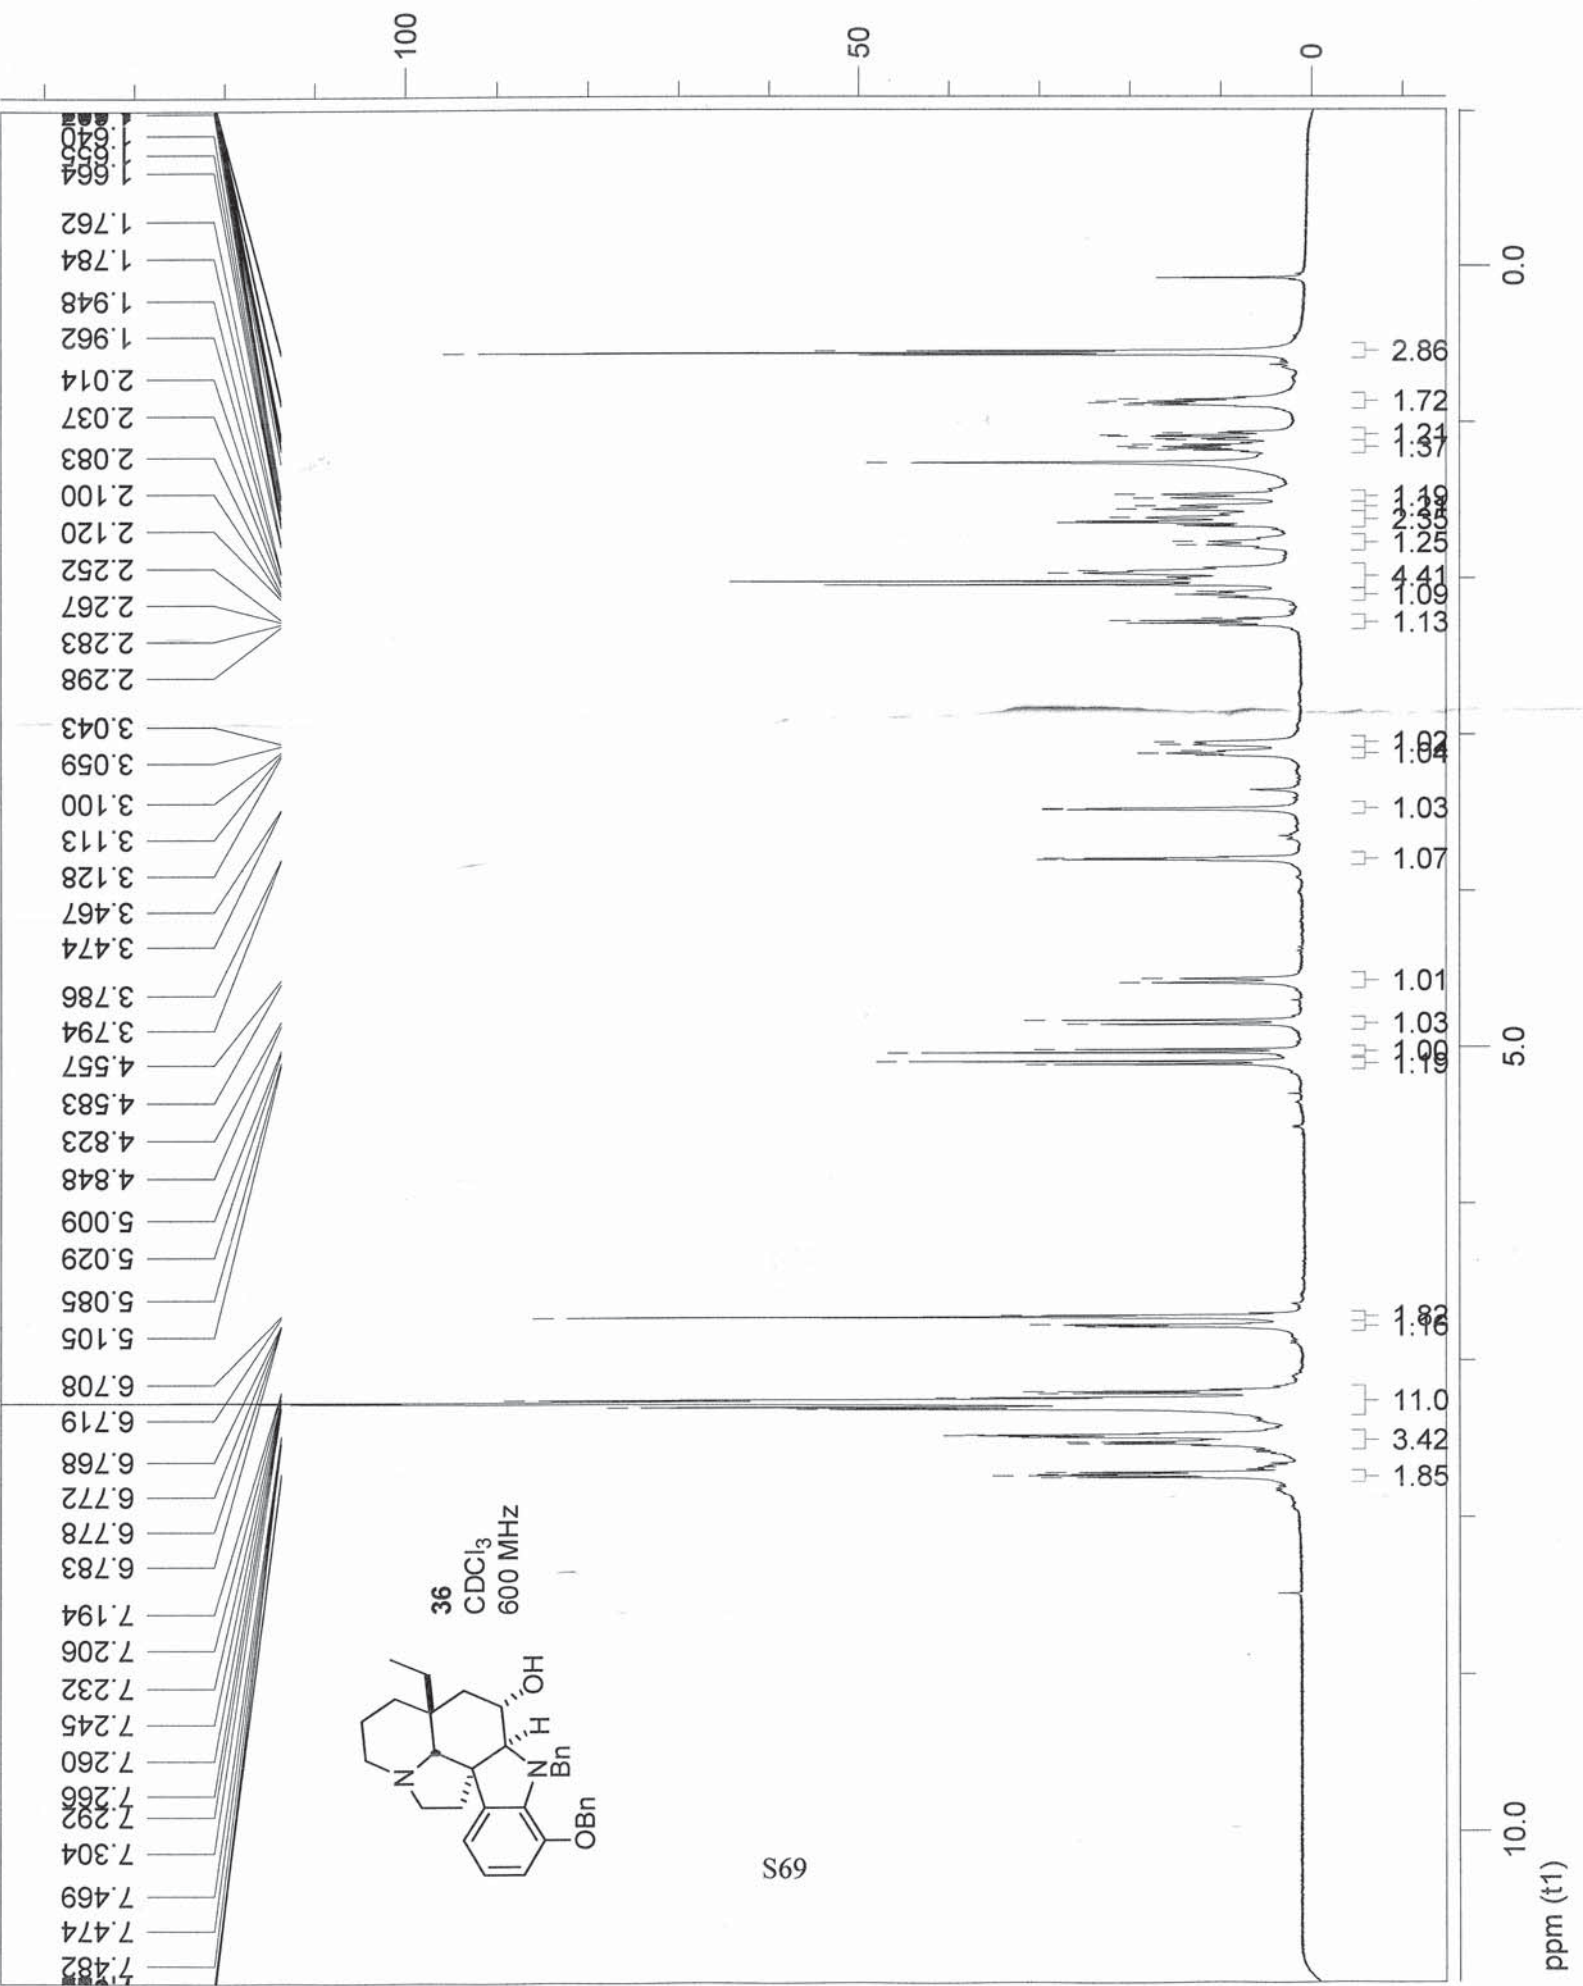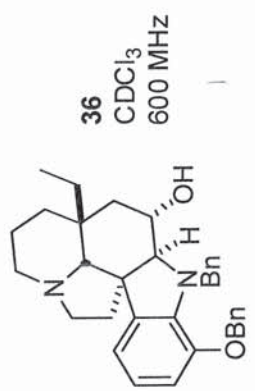

69S

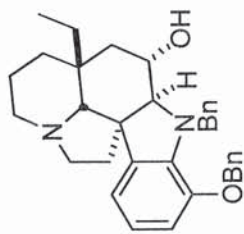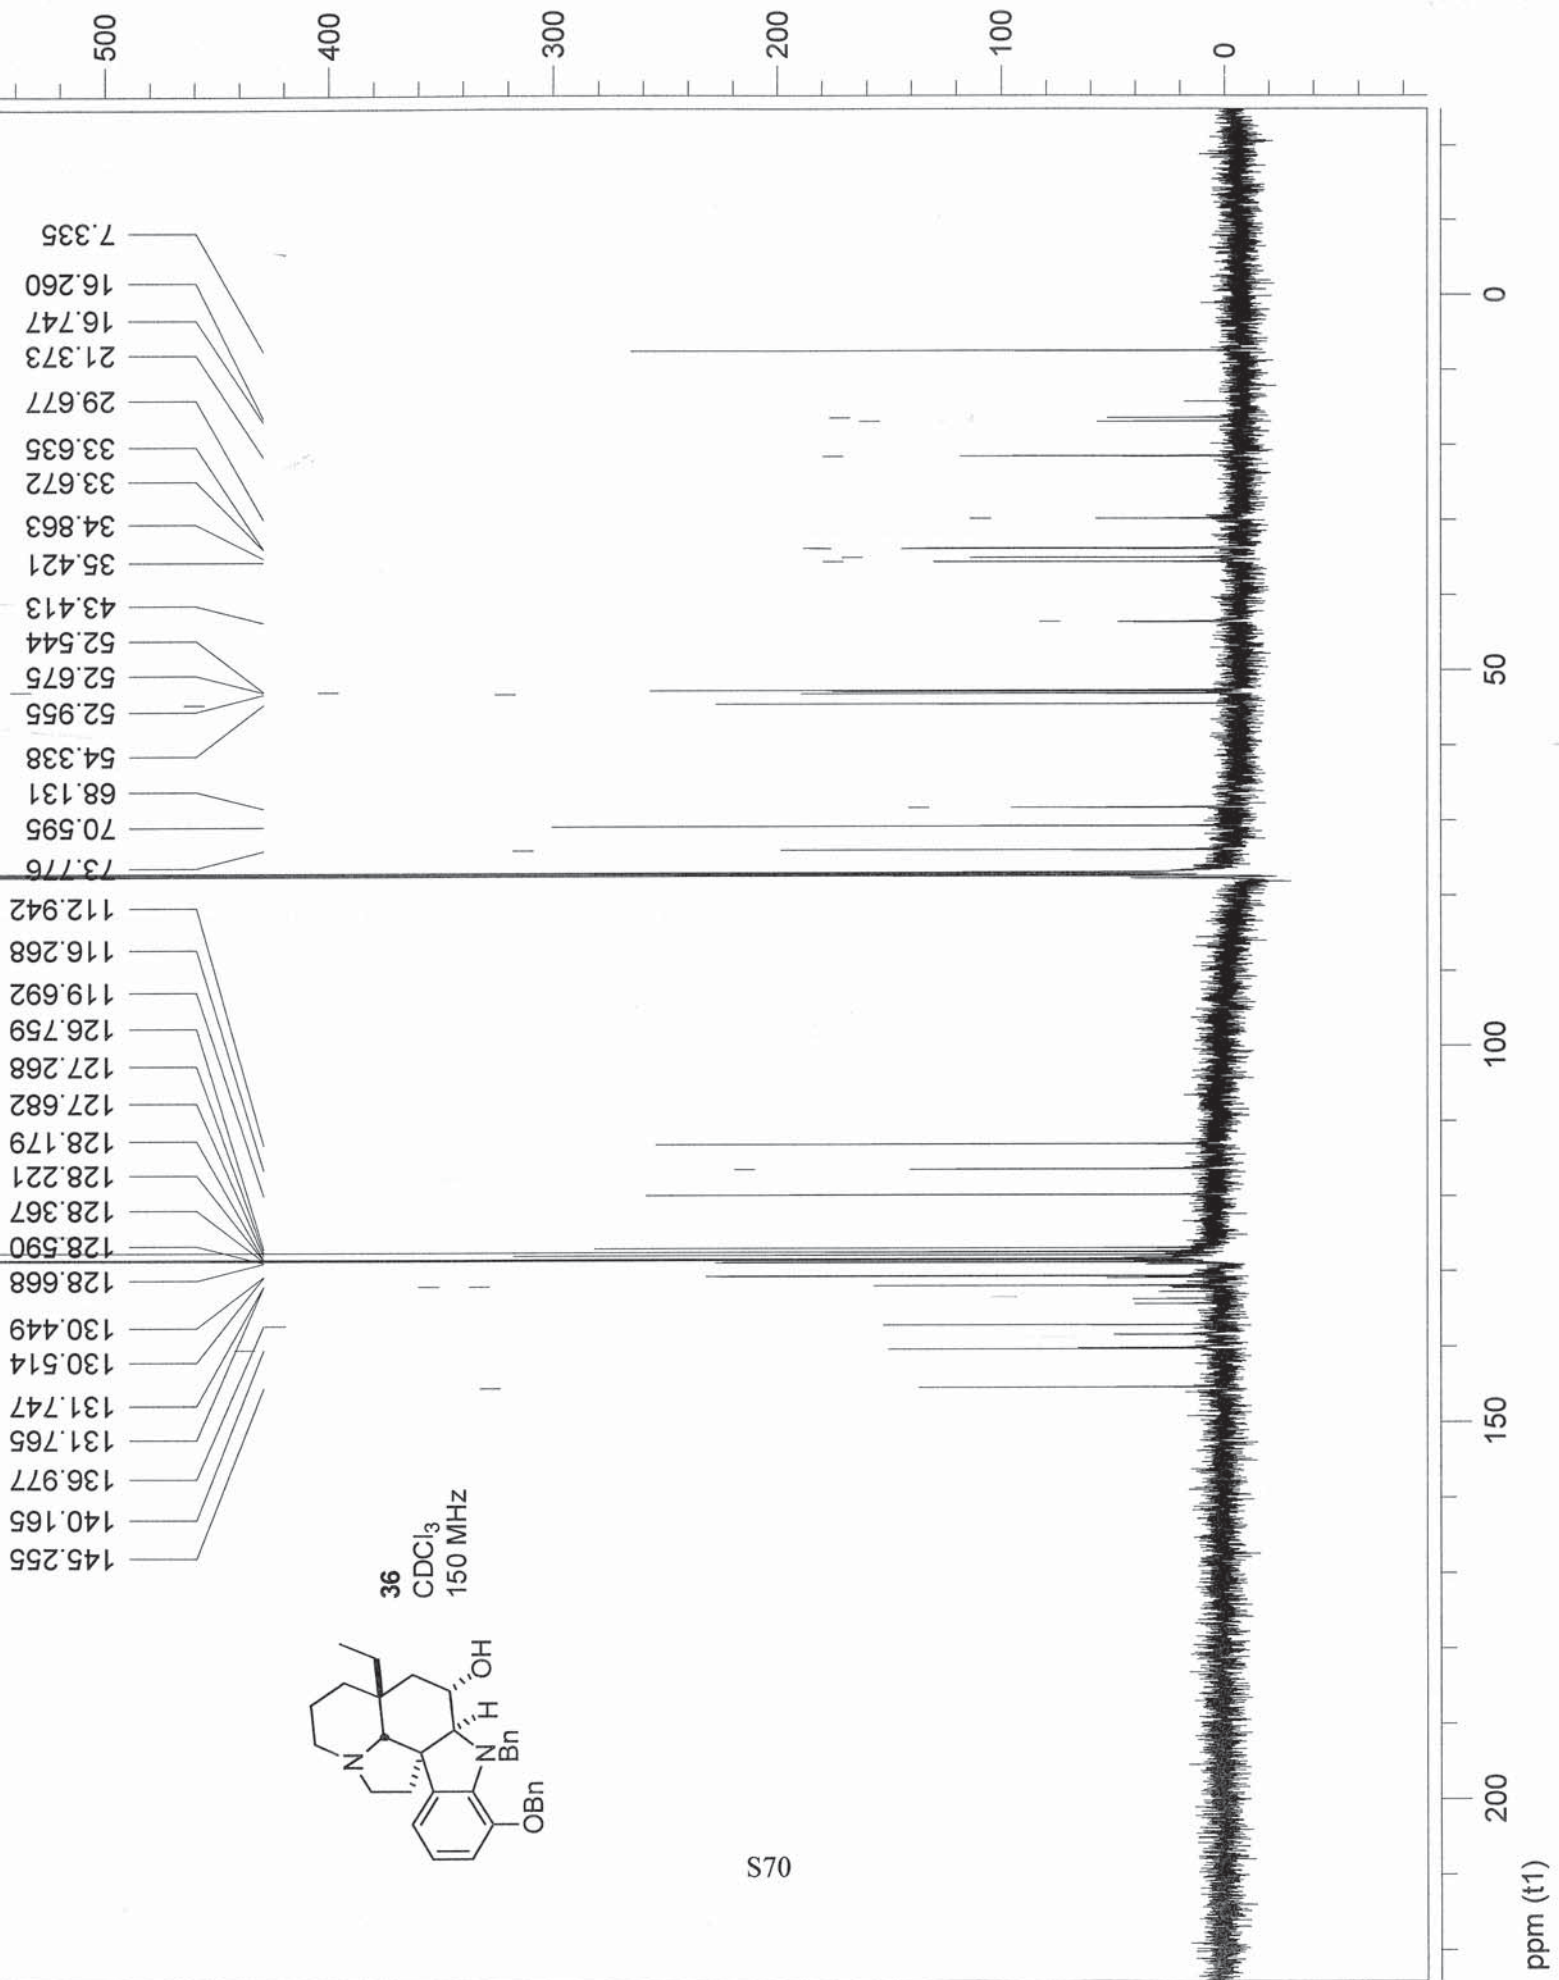



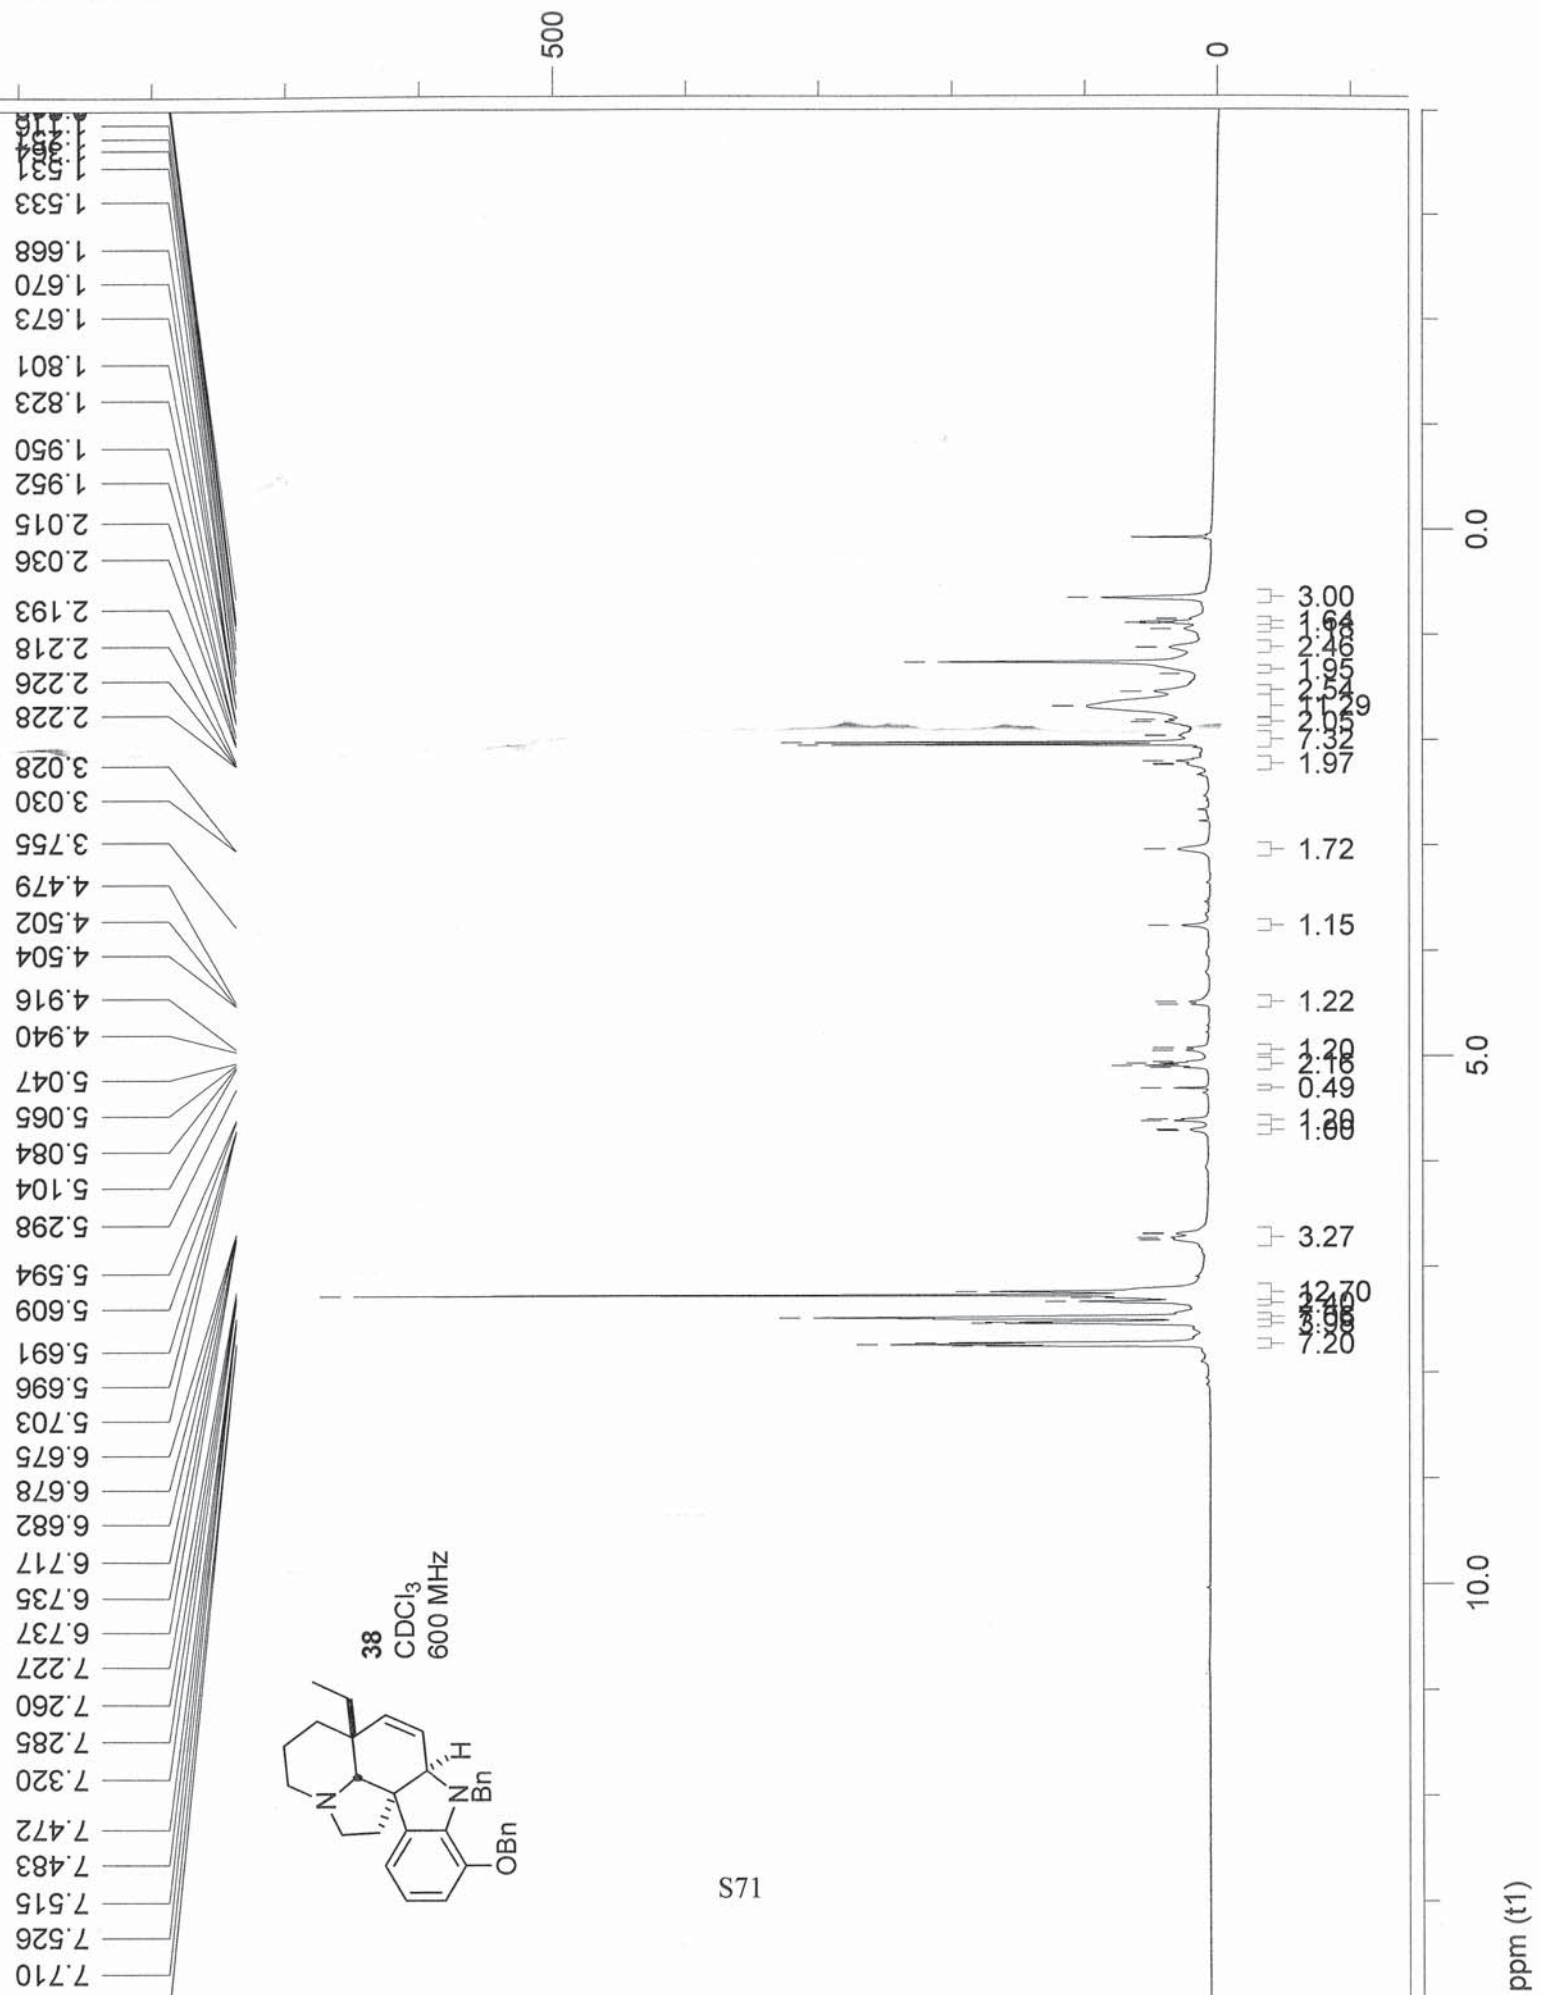

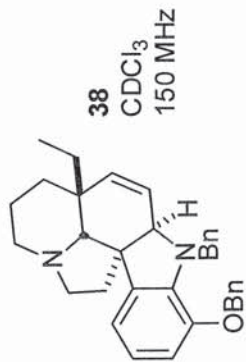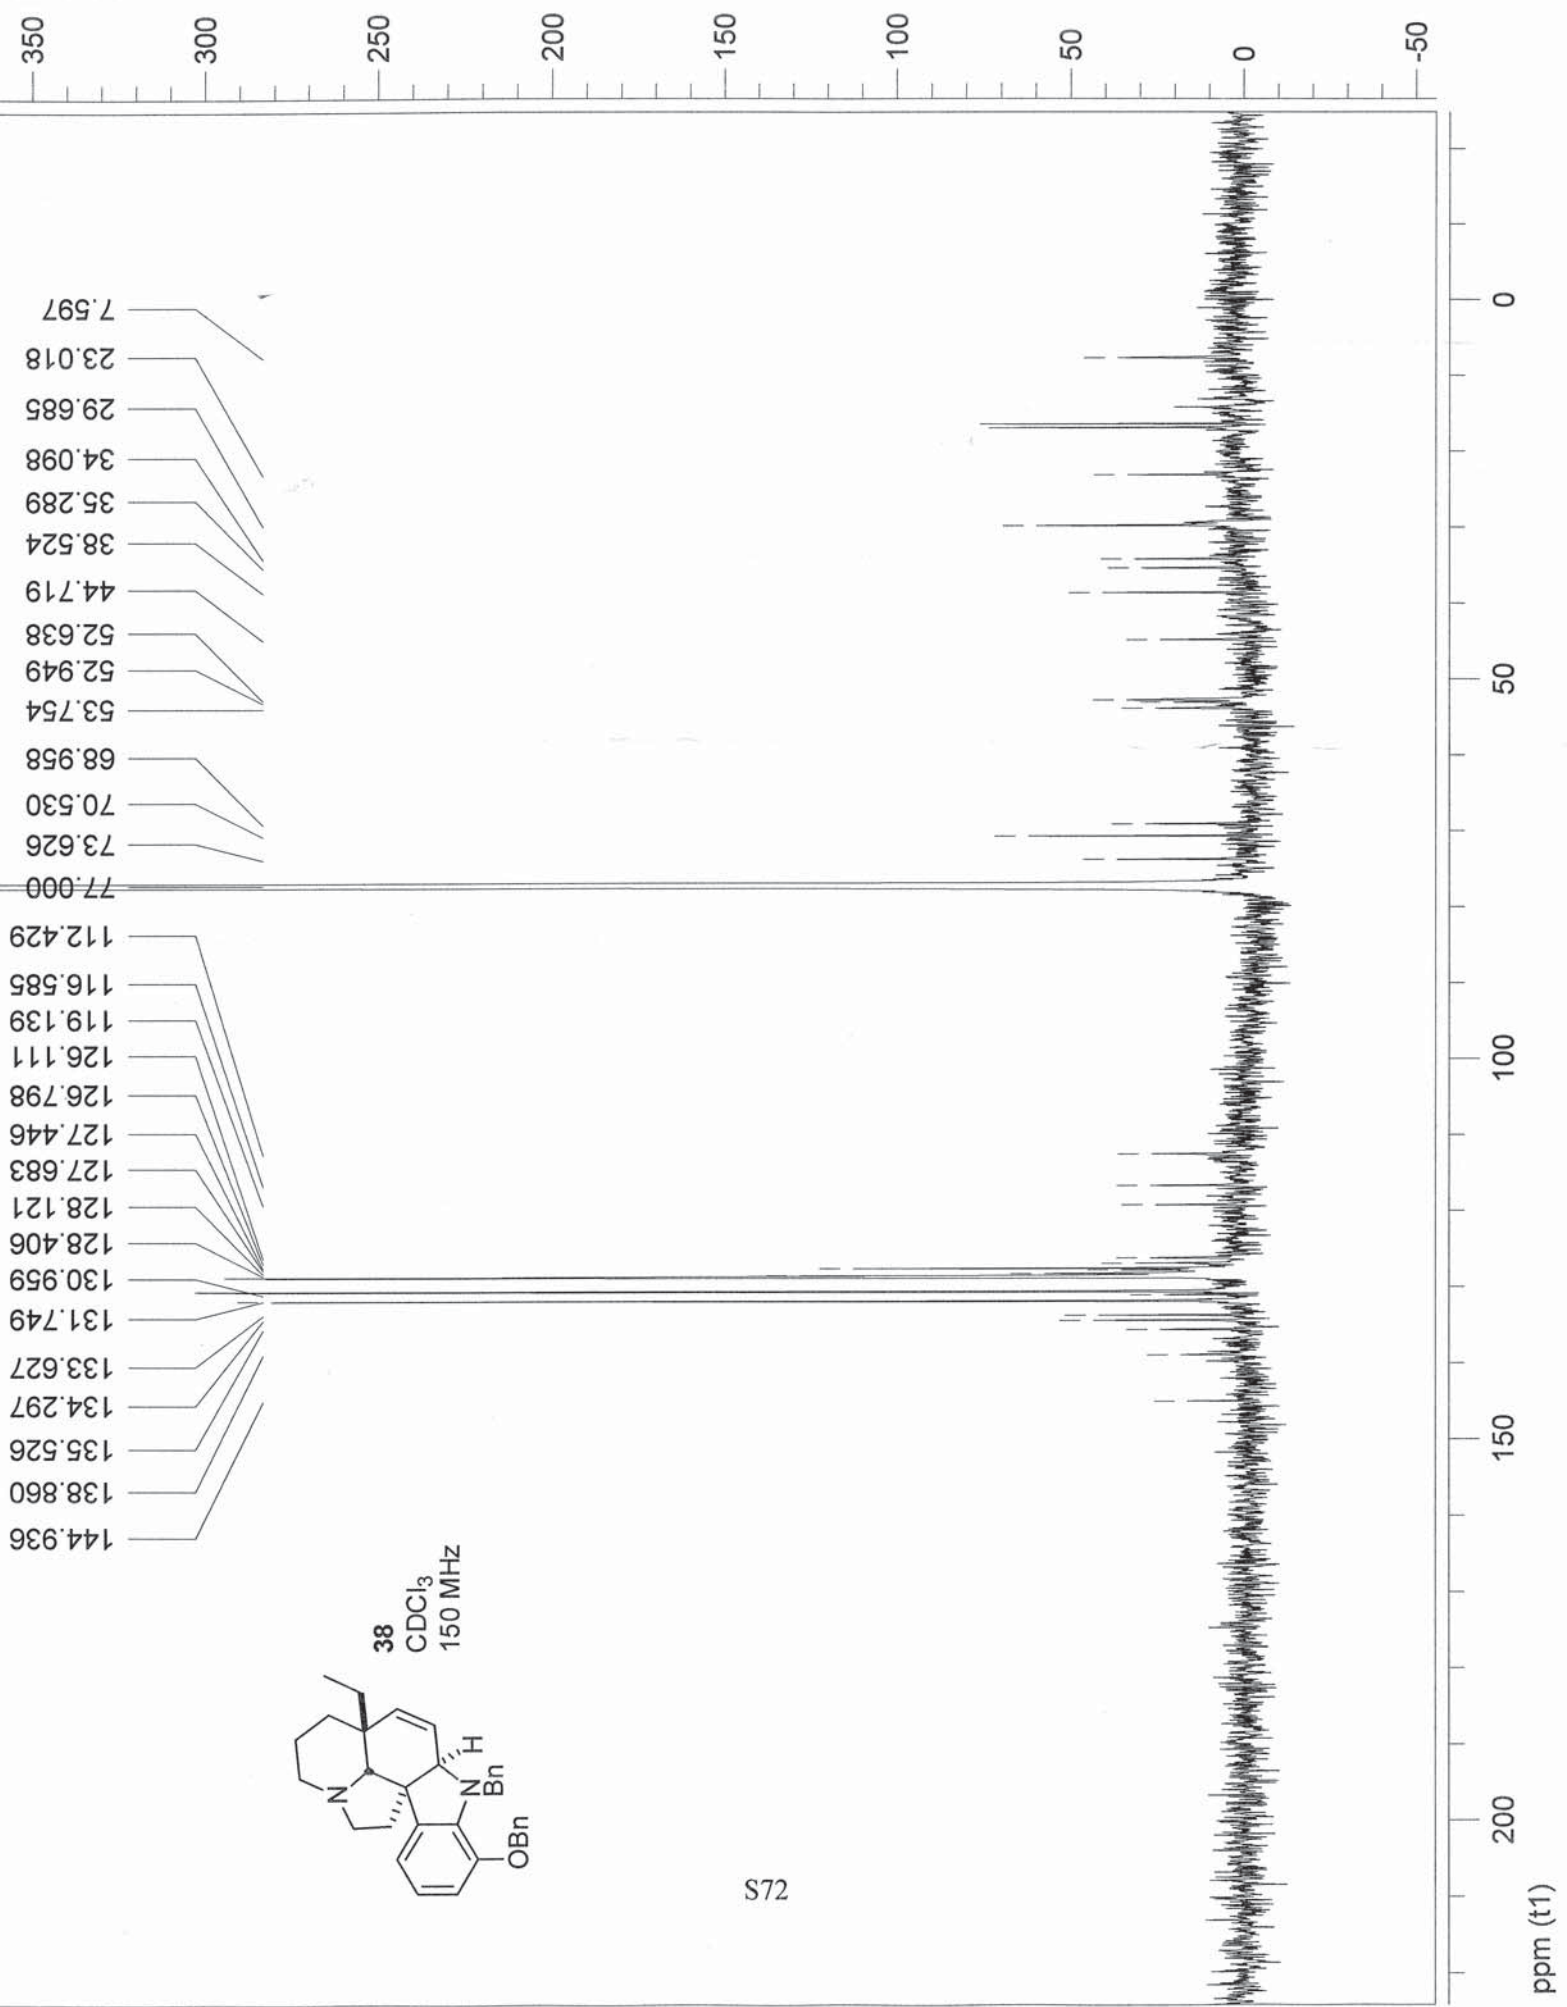

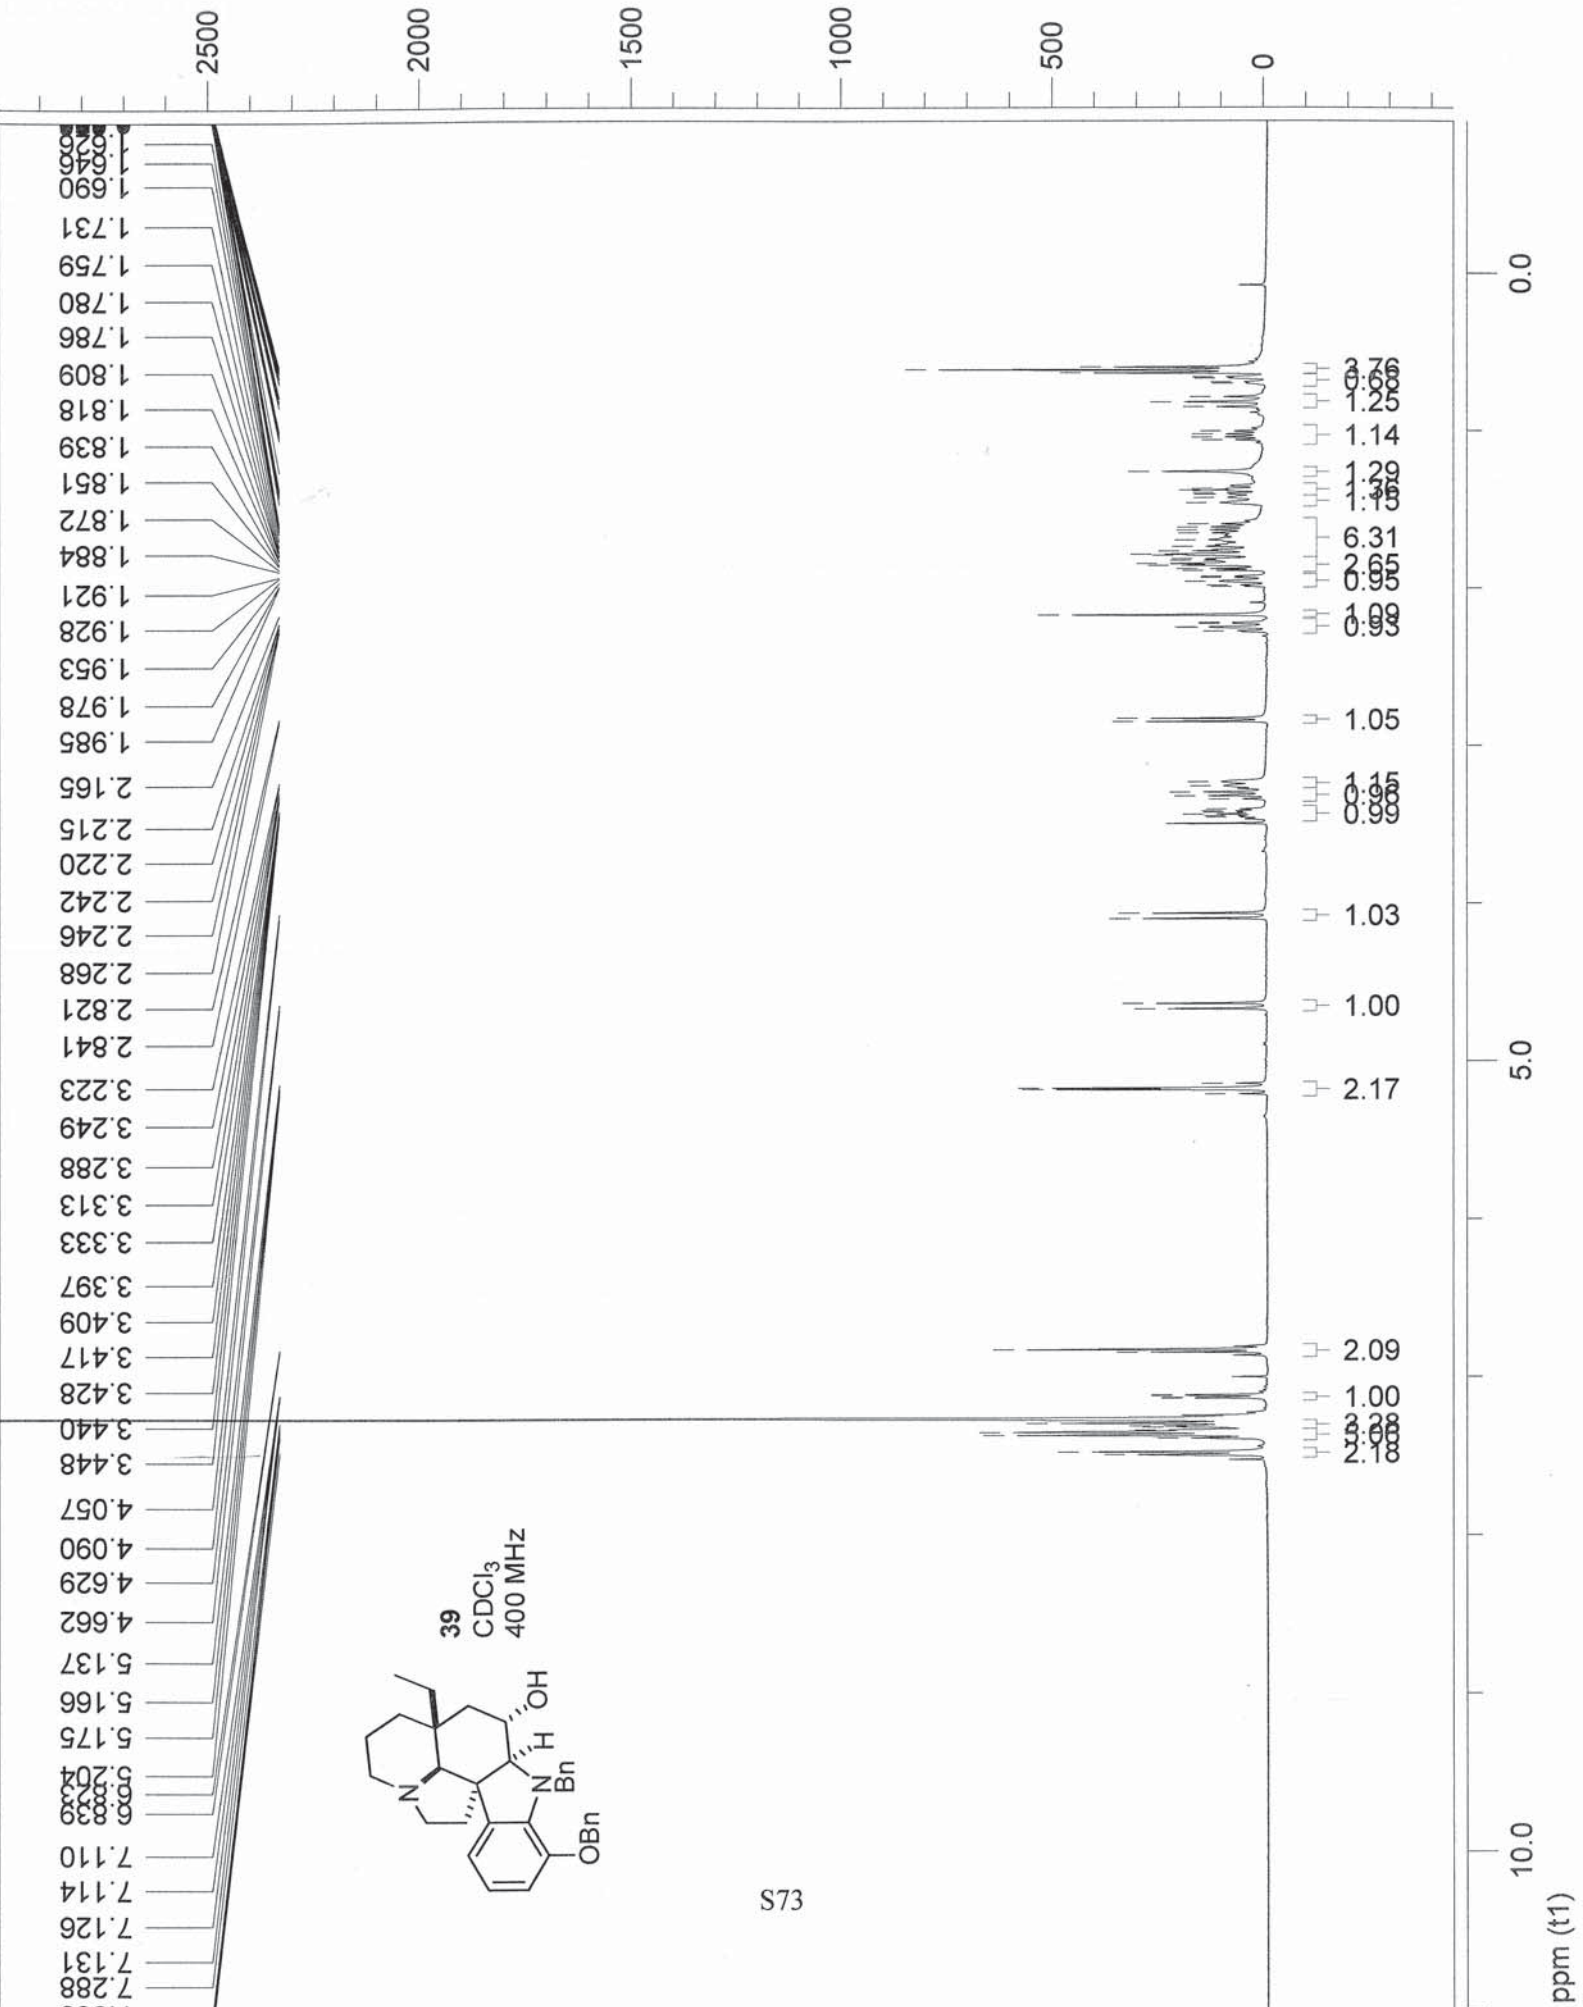

S73

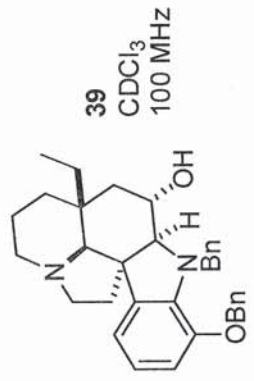

- 148.505
- 142.154
- 140.499
- 138.839
- 137.157
- 129.060
- 128.678
- 128.473
- 127.901
- 127.587
- 127.487
- 122.398
- 119.387
- 111.400
- 77.000
- 76.051
- 75.939
- 71.791
- 70.410
- 56.775
- 56.281
- 54.429
- 52.075
- 41.199
- 39.343
- 36.267
- 34.230
- 21.931
- 19.962
- 7.757

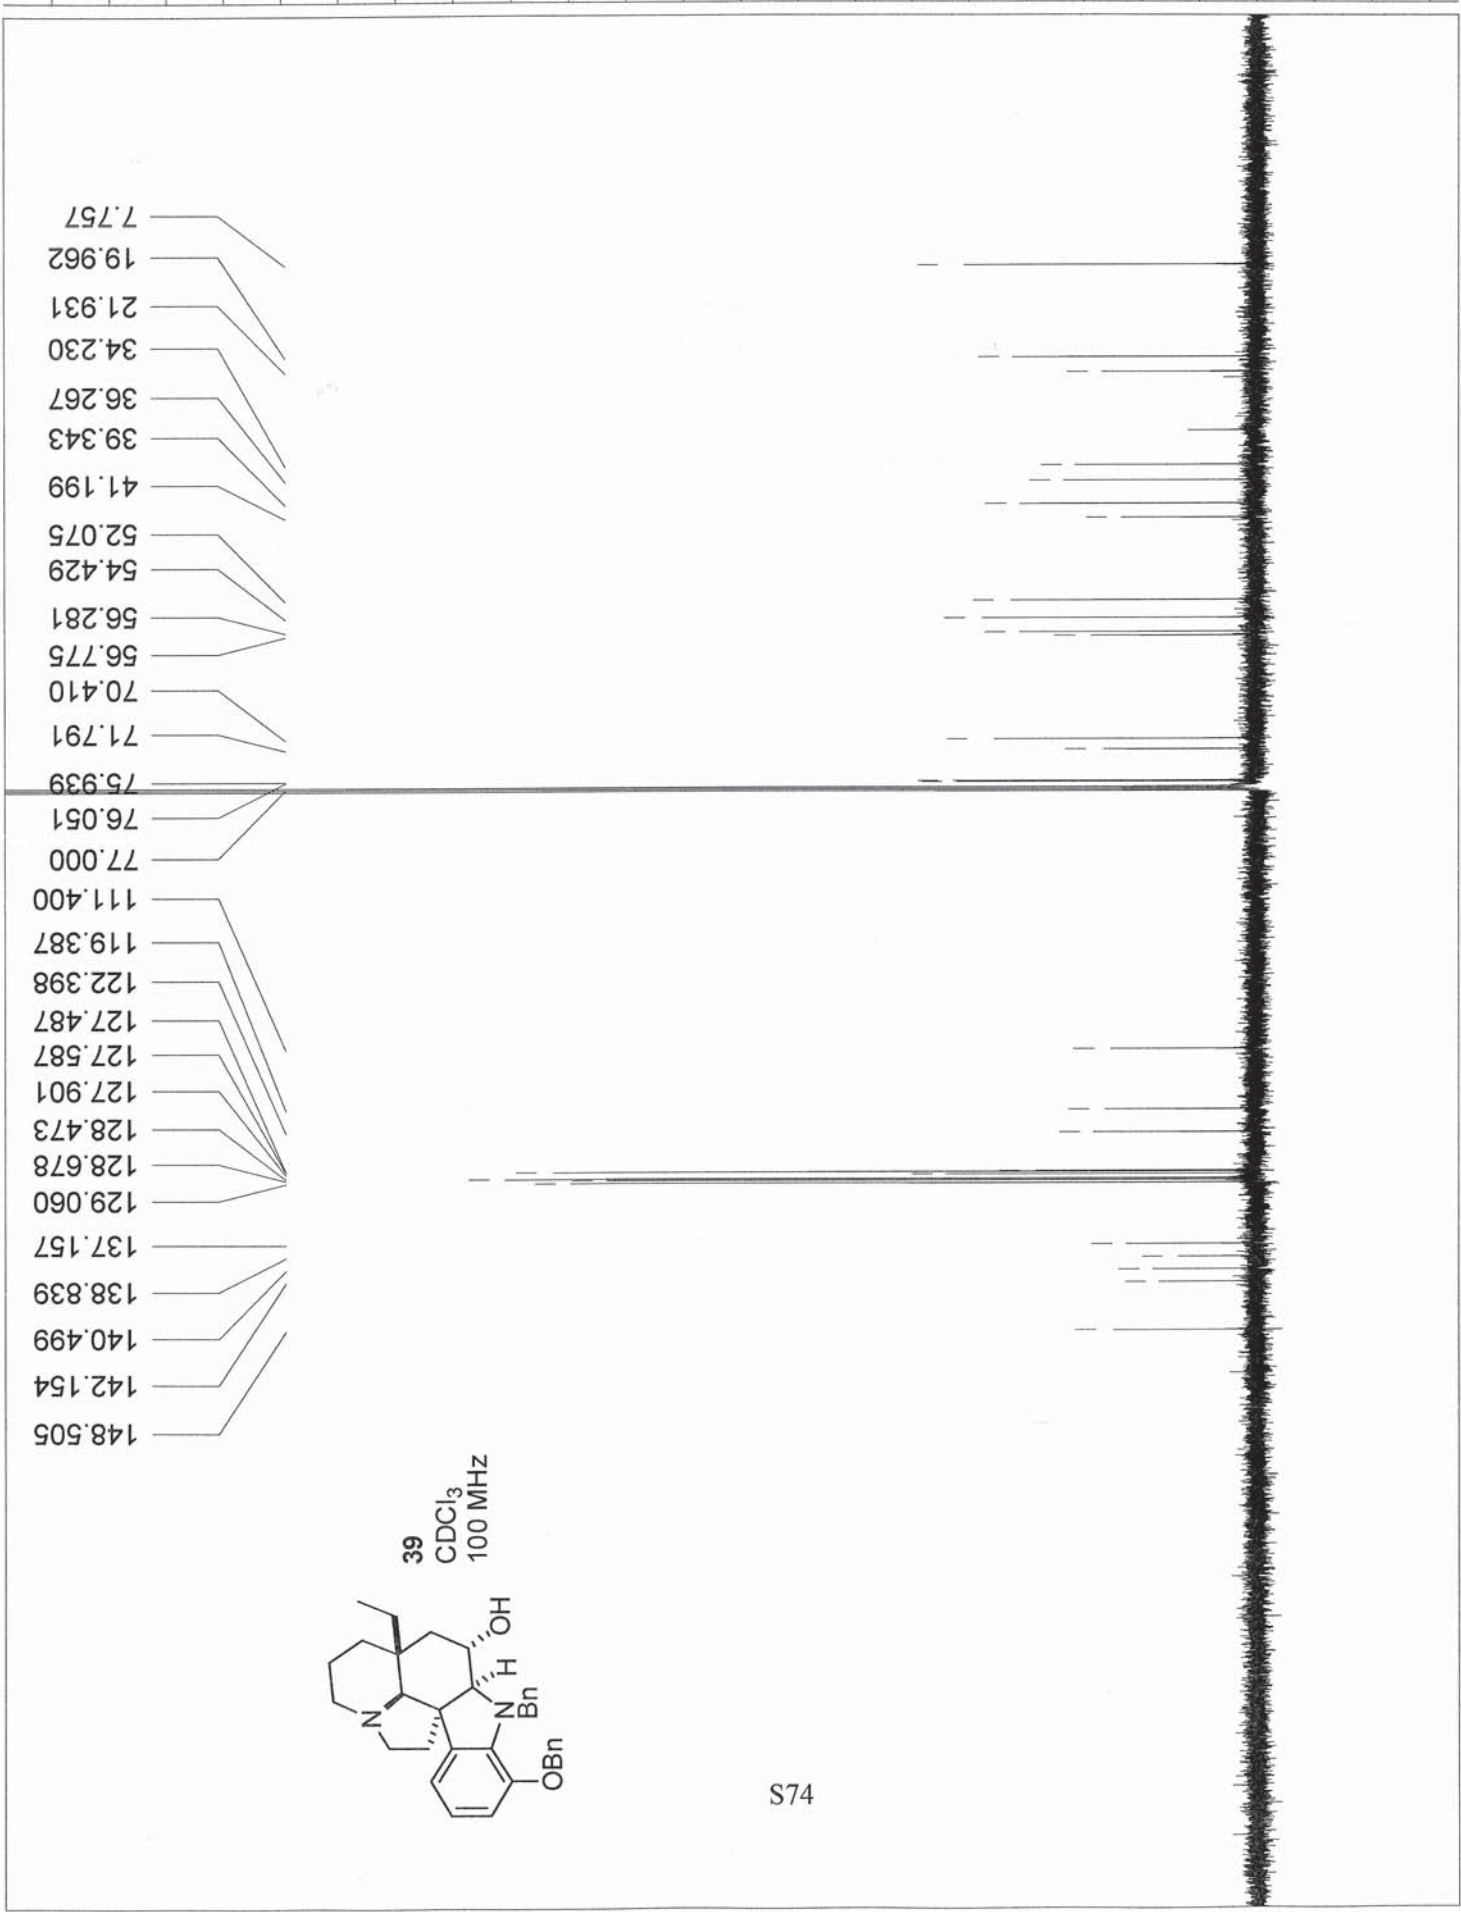



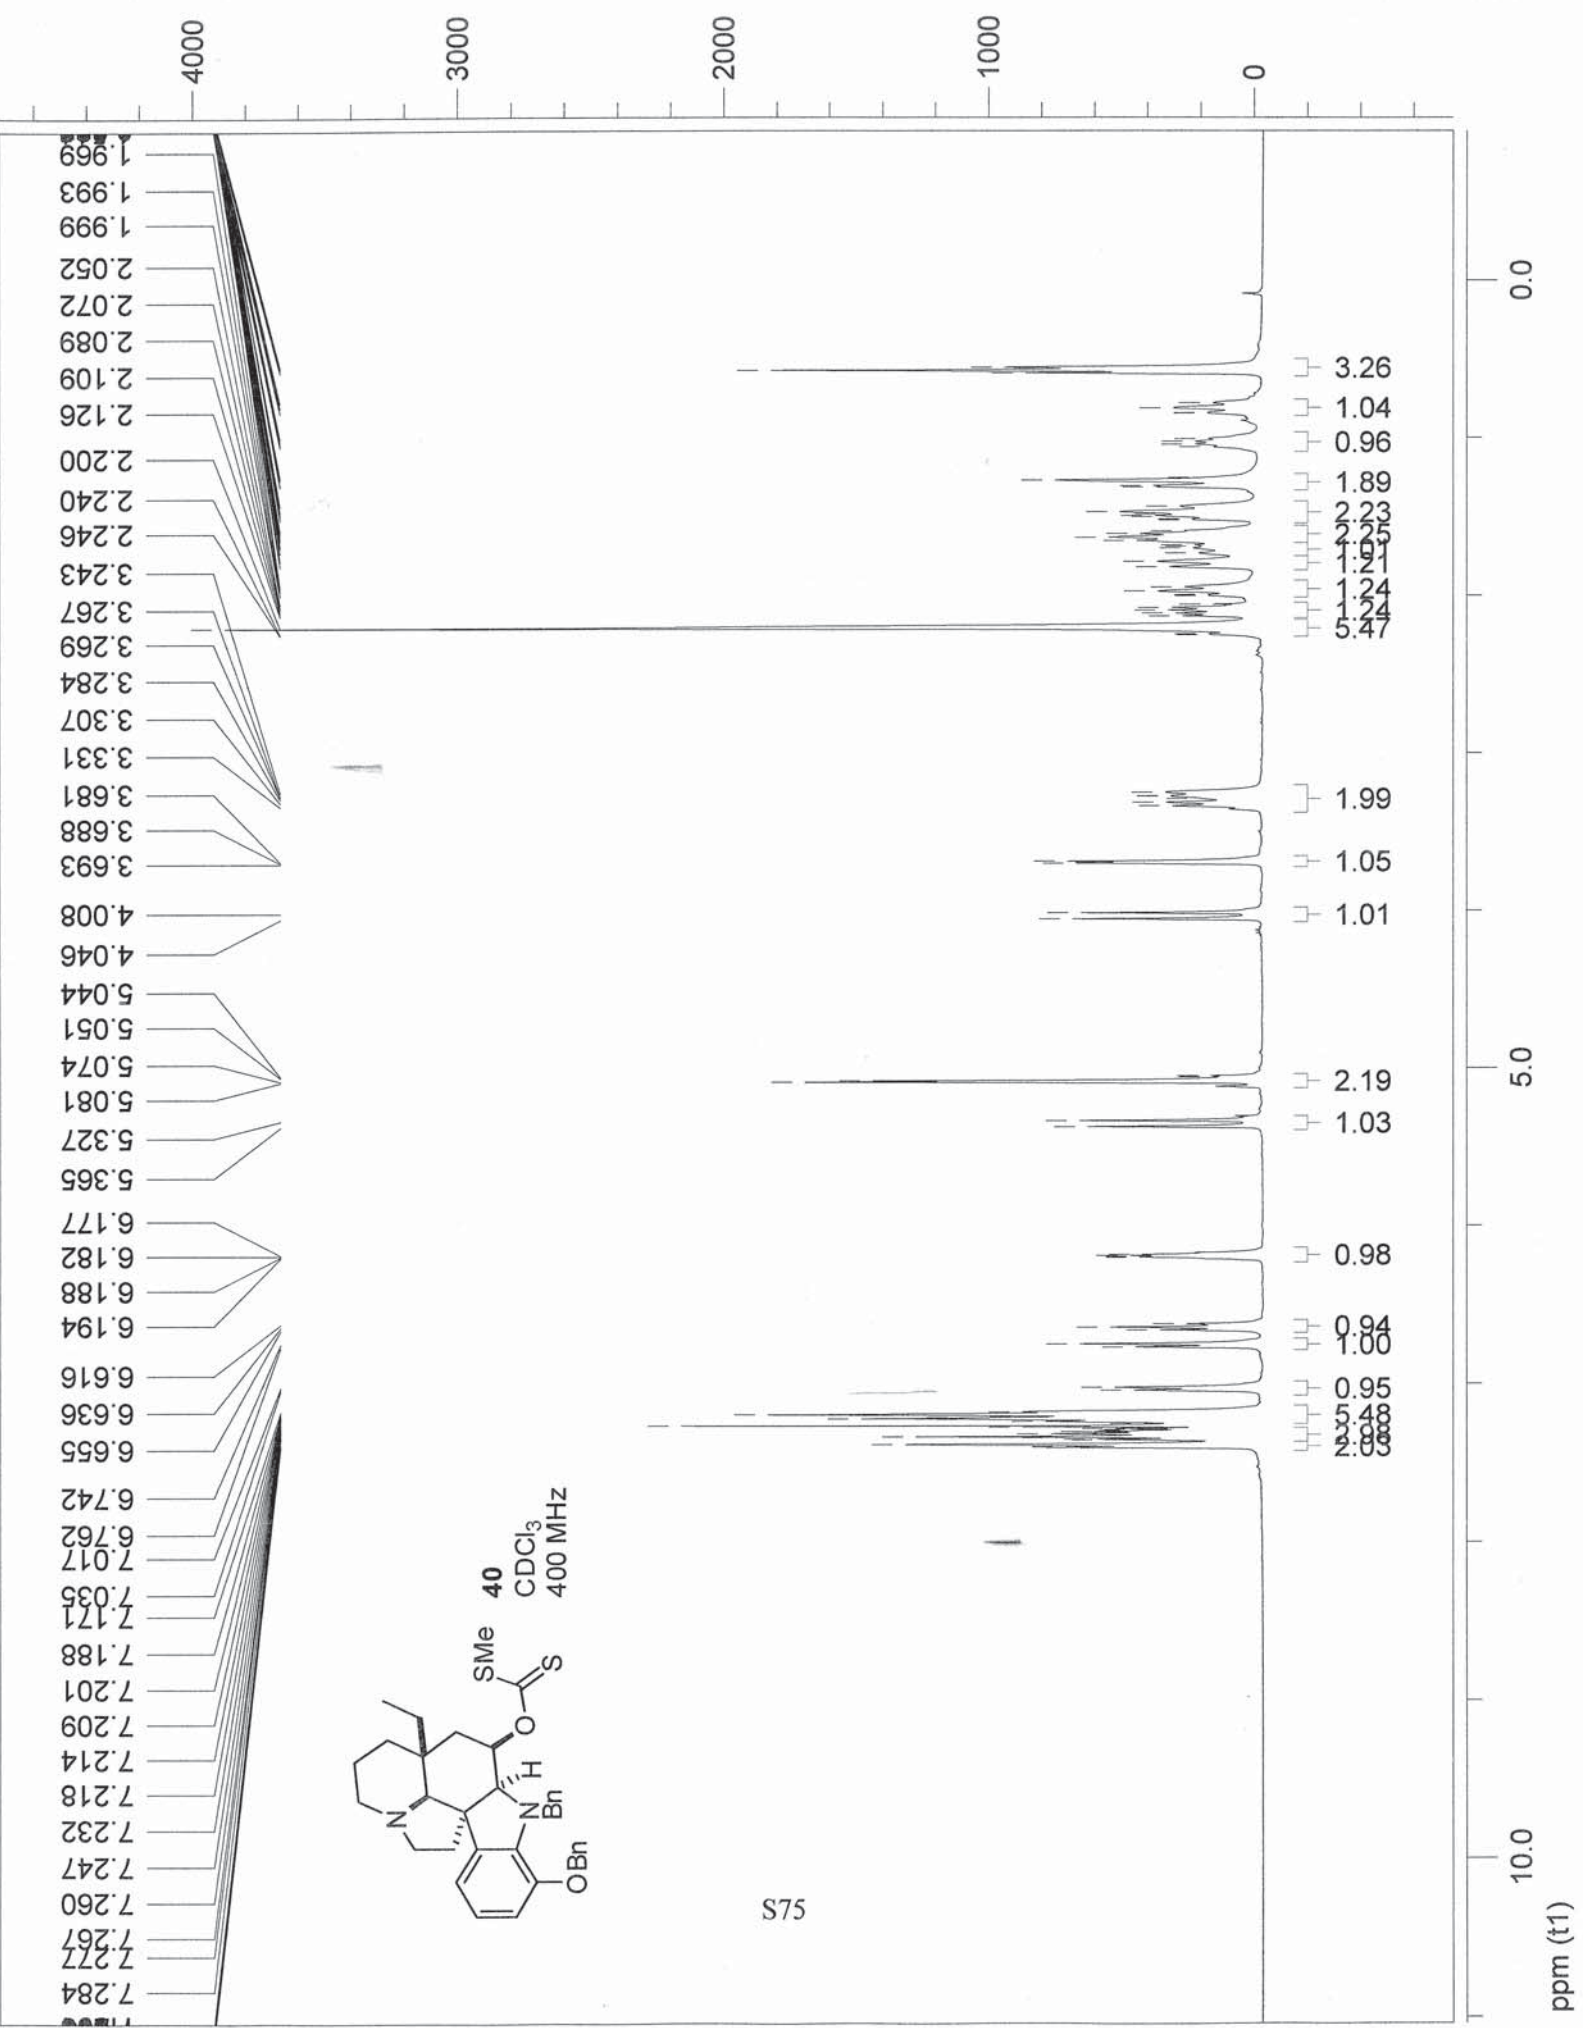



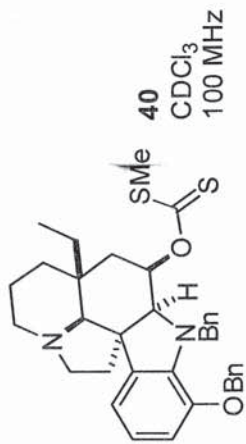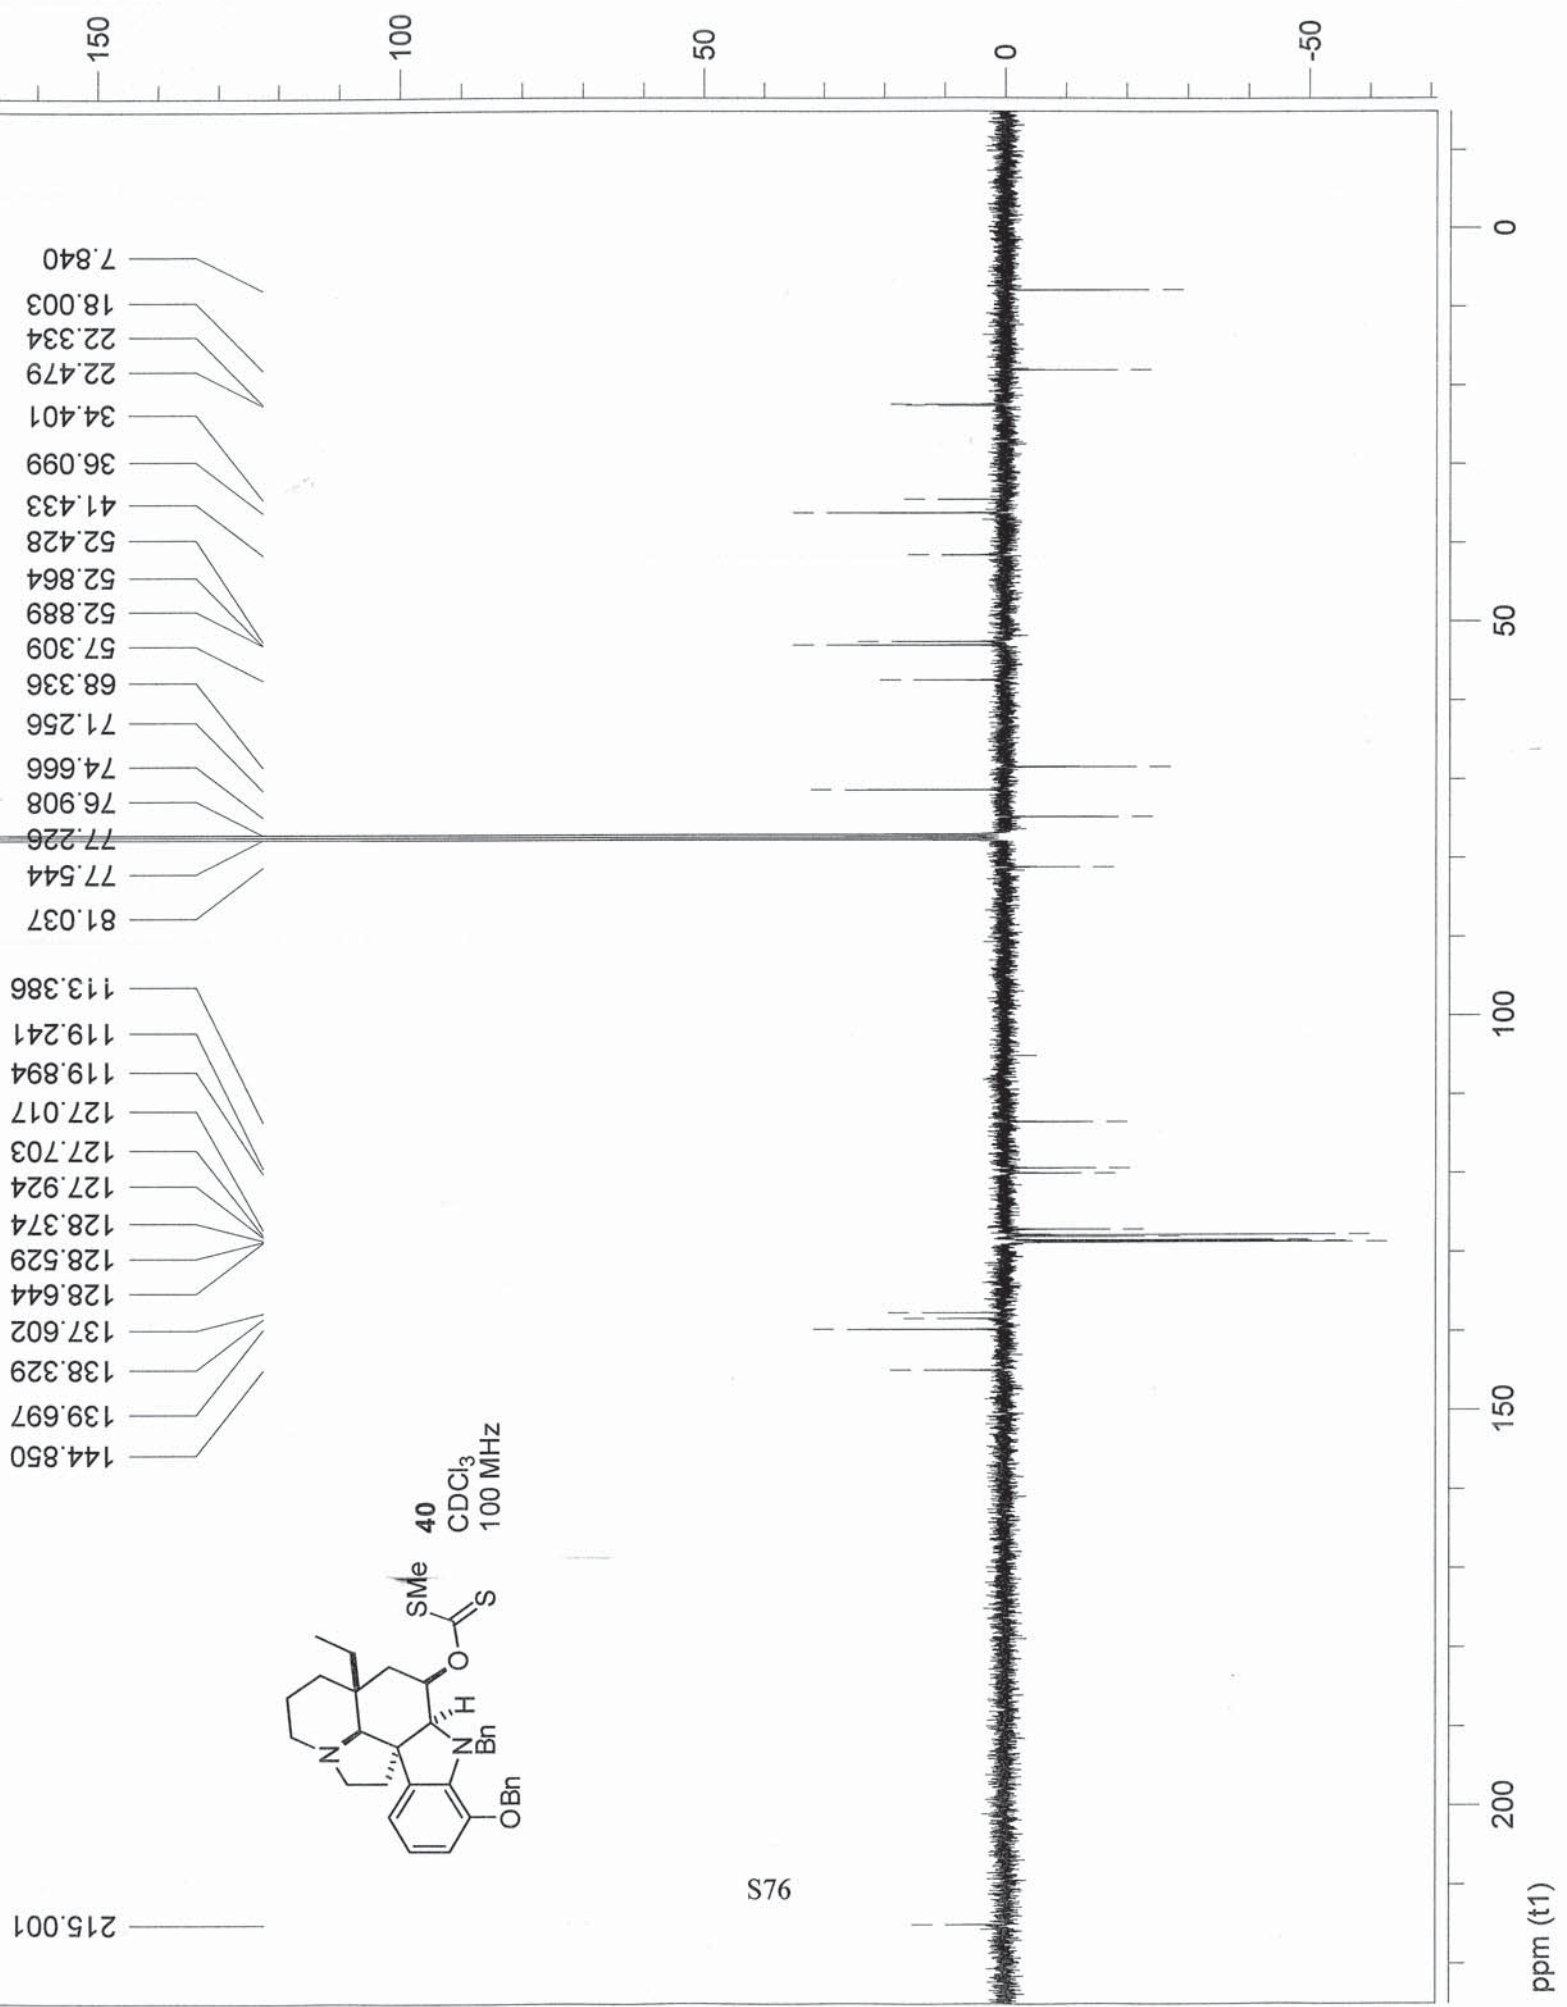

Supplement: NIHMS369009-supplement-1_si_001.pdf [file NIHMS369009-supplement-1_si_001.pdf]
